# Supplementary material for: Carbopalladation of C–C σ-bonds enabled by strained boronate complexes
Source: Springer Nature journal article supplement (doi:10.1038/s41557-018-0181-x), 2018-11-27
Supplement: 41557_2018_181_MOESM12_ESM.cif [file 41557_2018_181_MOESM12_ESM.cif]

data_tb34a
_audit_creation_date               2018-08-15
_audit_creation_method
;
Olex2 1.2
(compiled 2018.05.29 svn.r3508 for OlexSys, GUI svn.r5506)
;
_shelx_SHELXL_version_number       '2017/1'
_audit_contact_author_address      ?
_audit_contact_author_email        ?
_audit_contact_author_name         ''
_audit_contact_author_phone        ?
_publ_contact_author_id_orcid      ?
_publ_section_references
;
Dolomanov, O.V., Bourhis, L.J., Gildea, R.J, Howard, J.A.K. & Puschmann, H.
 (2009), J. Appl. Cryst. 42, 339-341.

Palatinus, L. & Chapuis, G. (2007). J. Appl. Cryst., 40, 786-790;
Palatinus, L. & van der Lee, A. (2008). J. Appl. Cryst. 41, 975-984;
Palatinus, L., Prathapa, S. J. & van Smaalen, S. (2012). J. Appl. Cryst. 45,
 575-580.

Sheldrick, G.M. (2015). Acta Cryst. C71, 3-8.
;
_chemical_name_common              ?
_chemical_name_systematic          ?
_chemical_formula_moiety           'C11 H12 O S'
_chemical_formula_sum              'C11 H12 O S'
_chemical_formula_weight           192.27
_chemical_melting_point            ?
loop_
  _atom_type_symbol
  _atom_type_description
  _atom_type_scat_dispersion_real
  _atom_type_scat_dispersion_imag
  _atom_type_scat_source
 'C' 'C' 0.0033 0.0016 'International Tables Vol C Tables 4.2.6.8 and 6.1.1.4'
 'H' 'H' 0.0000 0.0000 'International Tables Vol C Tables 4.2.6.8 and 6.1.1.4'
 'O' 'O' 0.0106 0.0060 'International Tables Vol C Tables 4.2.6.8 and 6.1.1.4'
 'S' 'S' 0.1246 0.1234 'International Tables Vol C Tables 4.2.6.8 and 6.1.1.4'

_shelx_space_group_comment
;
The symmetry employed for this shelxl refinement is uniquely defined
by the following loop, which should always be used as a source of
symmetry information in preference to the above space-group names.
They are only intended as comments.
;
_space_group_crystal_system        'monoclinic'
_space_group_IT_number             14
_space_group_name_H-M_alt          'P 1 21/c 1'
_space_group_name_Hall             '-P 2ybc'
loop_
  _space_group_symop_operation_xyz
 'x, y, z'
 '-x, y+1/2, -z+1/2'
 '-x, -y, -z'
 'x, -y-1/2, z-1/2'

_cell_length_a                     6.2461(2)
_cell_length_b                     6.9103(2)
_cell_length_c                     22.7041(6)
_cell_angle_alpha                  90
_cell_angle_beta                   94.1036(16)
_cell_angle_gamma                  90
_cell_volume                       977.45(5)
_cell_formula_units_Z              4
_cell_measurement_reflns_used      7273
_cell_measurement_temperature      100(2)
_cell_measurement_theta_max        27.10
_cell_measurement_theta_min        3.08
_shelx_estimated_absorpt_T_max     ?
_shelx_estimated_absorpt_T_min     ?
_exptl_absorpt_coefficient_mu      0.286
_exptl_absorpt_correction_T_max    0.7455
_exptl_absorpt_correction_T_min    0.5136
_exptl_absorpt_correction_type     multi-scan
_exptl_absorpt_process_details    
 'SADABS-2014/5 (Bruker,2014/5) was used for absorption correction. wR2(int) was 0.0825 before and 0.0490 after correction. The Ratio of minimum to maximum transmission is 0.6889. The \l/2 correction factor is Not present.'
_exptl_absorpt_special_details     ?
_exptl_crystal_colour              colourless
_exptl_crystal_colour_primary      colourless
_exptl_crystal_density_diffrn      1.307
_exptl_crystal_density_meas        ?
_exptl_crystal_density_method      ?
_exptl_crystal_description         block
_exptl_crystal_F_000               408
_exptl_crystal_size_max            0.412
_exptl_crystal_size_mid            0.254
_exptl_crystal_size_min            0.137
_exptl_transmission_factor_max     ?
_exptl_transmission_factor_min     ?
_diffrn_reflns_av_R_equivalents    0.0368
_diffrn_reflns_av_unetI/netI       0.0202
_diffrn_reflns_Laue_measured_fraction_full  1.000
_diffrn_reflns_Laue_measured_fraction_max  1.000
_diffrn_reflns_limit_h_max         8
_diffrn_reflns_limit_h_min         -8
_diffrn_reflns_limit_k_max         8
_diffrn_reflns_limit_k_min         -8
_diffrn_reflns_limit_l_max         28
_diffrn_reflns_limit_l_min         -29
_diffrn_reflns_number              15603
_diffrn_reflns_point_group_measured_fraction_full  1.000
_diffrn_reflns_point_group_measured_fraction_max  1.000
_diffrn_reflns_theta_full          25.242
_diffrn_reflns_theta_max           27.100
_diffrn_reflns_theta_min           1.798
_diffrn_ambient_temperature        100(2)
_diffrn_detector                   'Bruker area detector'
_diffrn_detector_area_resol_mean   ?
_diffrn_detector_type              'CCD area detector'
_diffrn_measured_fraction_theta_full  1.000
_diffrn_measured_fraction_theta_max  1.000
_diffrn_measurement_device         'Bruker Apex II kappa CCD area detector'
_diffrn_measurement_device_type    'Bruker APEX-II CCD'
_diffrn_measurement_method         '\f and \w scans'
_diffrn_radiation_monochromator    graphite
_diffrn_radiation_type             MoK\a
_diffrn_radiation_wavelength       0.71073
_diffrn_source                     'fine-focus sealed tube'
_diffrn_standards_number           0
_reflns_Friedel_coverage           0.000
_reflns_Friedel_fraction_full      .
_reflns_Friedel_fraction_max       .
_reflns_number_gt                  1953
_reflns_number_total               2139
_reflns_special_details
;
 Reflections were merged by SHELXL according to the crystal
 class for the calculation of statistics and refinement.
 
 _reflns_Friedel_fraction is defined as the number of unique
 Friedel pairs measured divided by the number that would be
 possible theoretically, ignoring centric projections and
 systematic absences.
;
_reflns_threshold_expression       'I > 2\s(I)'
_computing_cell_refinement         'SAINT v8.37A (Bruker, 2015)'
_computing_data_collection         'Bruker Apex suite'
_computing_data_reduction          'SAINT v8.37A (Bruker, 2015)'
_computing_molecular_graphics      'Olex2 (Dolomanov et al., 2009)'
_computing_publication_material    'Olex2 (Dolomanov et al., 2009)'
_computing_structure_refinement    'ShelXL (Sheldrick, 2015)'
_computing_structure_solution
;
Superflip (Palatinus & Chapuis, 2007;Palatinus & van der Lee, 2008;
Palatinus et al., 2012)
;
_refine_diff_density_max           0.337
_refine_diff_density_min           -0.288
_refine_diff_density_rms           0.050
_refine_ls_extinction_coef         .
_refine_ls_extinction_method       none
_refine_ls_goodness_of_fit_ref     1.050
_refine_ls_hydrogen_treatment      constr
_refine_ls_matrix_type             full
_refine_ls_number_parameters       119
_refine_ls_number_reflns           2139
_refine_ls_number_restraints       0
_refine_ls_R_factor_all            0.0341
_refine_ls_R_factor_gt             0.0305
_refine_ls_restrained_S_all        1.050
_refine_ls_shift/su_max            0.001
_refine_ls_shift/su_mean           0.000
_refine_ls_structure_factor_coef   Fsqd
_refine_ls_weighting_details      
 'w=1/[\s^2^(Fo^2^)+(0.0413P)^2^+0.5551P] where P=(Fo^2^+2Fc^2^)/3'
_refine_ls_weighting_scheme        calc
_refine_ls_wR_factor_gt            0.0816
_refine_ls_wR_factor_ref           0.0839
_refine_special_details            ?
_olex2_refinement_description
;
1. Fixed Uiso
 At 1.2 times of:
  All C(H) groups, All C(H,H) groups
 At 1.5 times of:
  All C(H,H,H) groups
2.a Ternary CH refined with riding coordinates:
 C10(H10)
2.b Secondary CH2 refined with riding coordinates:
 C9(H9A,H9B), C11(H11A,H11B)
2.c Aromatic/amide H refined with riding coordinates:
 C2(H2), C3(H3), C5(H5), C6(H6)
2.d Idealised Me refined as rotating group:
 C7(H7A,H7B,H7C)
;
_atom_sites_solution_hydrogens     geom
_atom_sites_solution_primary       iterative
_atom_sites_solution_secondary     ?
loop_
  _atom_site_label
  _atom_site_type_symbol
  _atom_site_fract_x
  _atom_site_fract_y
  _atom_site_fract_z
  _atom_site_U_iso_or_equiv
  _atom_site_adp_type
  _atom_site_occupancy
  _atom_site_site_symmetry_order
  _atom_site_calc_flag
  _atom_site_refinement_flags_posn
  _atom_site_refinement_flags_adp
  _atom_site_refinement_flags_occupancy
  _atom_site_disorder_assembly
  _atom_site_disorder_group
 S1 S 0.03160(5) 0.57262(5) 0.42077(2) 0.01537(11) Uani 1 1 d . . . . .
 O1 O -0.20791(15) 0.59091(15) 0.41497(4) 0.0218(2) Uani 1 1 d . . . . .
 C1 C 0.1157(2) 0.58444(18) 0.34694(6) 0.0149(3) Uani 1 1 d . . . . .
 C2 C -0.0306(2) 0.64573(19) 0.30202(6) 0.0163(3) Uani 1 1 d . . . . .
 H2 H -0.169141 0.680626 0.310285 0.020 Uiso 1 1 calc R . . . .
 C3 C 0.0314(2) 0.65449(19) 0.24462(6) 0.0178(3) Uani 1 1 d . . . . .
 H3 H -0.066129 0.696914 0.214512 0.021 Uiso 1 1 calc R . . . .
 C4 C 0.2376(2) 0.60080(19) 0.23131(6) 0.0179(3) Uani 1 1 d . . . . .
 C5 C 0.3808(2) 0.5371(2) 0.27725(6) 0.0193(3) Uani 1 1 d . . . . .
 H5 H 0.518417 0.499465 0.268951 0.023 Uiso 1 1 calc R . . . .
 C6 C 0.3224(2) 0.5288(2) 0.33508(6) 0.0183(3) Uani 1 1 d . . . . .
 H6 H 0.419590 0.486705 0.365326 0.022 Uiso 1 1 calc R . . . .
 C7 C 0.3015(3) 0.6088(2) 0.16861(6) 0.0246(3) Uani 1 1 d . . . . .
 H7A H 0.248480 0.495978 0.147643 0.037 Uiso 1 1 calc GR . . . .
 H7B H 0.455157 0.612837 0.168631 0.037 Uiso 1 1 calc GR . . . .
 H7C H 0.241685 0.722649 0.149623 0.037 Uiso 1 1 calc GR . . . .
 C8 C 0.1402(2) 0.7922(2) 0.44677(6) 0.0173(3) Uani 1 1 d . . . . .
 C9 C 0.2199(2) 0.9677(2) 0.41582(7) 0.0230(3) Uani 1 1 d . . . . .
 H9A H 0.223013 0.962174 0.373204 0.028 Uiso 1 1 calc R . . . .
 H9B H 0.185904 1.093791 0.431437 0.028 Uiso 1 1 calc R . . . .
 C10 C 0.3747(2) 0.8442(2) 0.45175(6) 0.0211(3) Uani 1 1 d . . . . .
 H10 H 0.497982 0.770491 0.439486 0.025 Uiso 1 1 calc R . . . .
 C11 C 0.2574(2) 0.8257(2) 0.50636(6) 0.0230(3) Uani 1 1 d . . . . .
 H11A H 0.225757 0.943490 0.527300 0.028 Uiso 1 1 calc R . . . .
 H11B H 0.288358 0.713896 0.531353 0.028 Uiso 1 1 calc R . . . .

loop_
  _atom_site_aniso_label
  _atom_site_aniso_U_11
  _atom_site_aniso_U_22
  _atom_site_aniso_U_33
  _atom_site_aniso_U_23
  _atom_site_aniso_U_13
  _atom_site_aniso_U_12
 S1 0.01231(18) 0.01726(18) 0.01678(18) -0.00027(12) 0.00271(12) -0.00154(11)
 O1 0.0113(5) 0.0300(6) 0.0245(5) -0.0013(4) 0.0040(4) -0.0029(4)
 C1 0.0135(6) 0.0144(6) 0.0169(6) -0.0024(5) 0.0023(5) -0.0013(5)
 C2 0.0129(6) 0.0151(6) 0.0211(6) -0.0014(5) 0.0015(5) 0.0009(5)
 C3 0.0185(7) 0.0158(6) 0.0188(6) 0.0005(5) -0.0009(5) 0.0002(5)
 C4 0.0203(7) 0.0145(6) 0.0196(6) -0.0026(5) 0.0051(5) -0.0045(5)
 C5 0.0126(6) 0.0217(7) 0.0243(7) -0.0055(5) 0.0046(5) -0.0014(5)
 C6 0.0137(6) 0.0206(7) 0.0205(6) -0.0032(5) -0.0009(5) 0.0014(5)
 C7 0.0277(8) 0.0251(8) 0.0219(7) -0.0013(6) 0.0083(6) -0.0046(6)
 C8 0.0147(6) 0.0194(7) 0.0183(6) -0.0031(5) 0.0051(5) -0.0029(5)
 C9 0.0247(7) 0.0194(7) 0.0255(7) -0.0012(6) 0.0069(6) -0.0046(6)
 C10 0.0157(7) 0.0245(7) 0.0235(7) -0.0049(6) 0.0051(5) -0.0056(5)
 C11 0.0215(7) 0.0284(8) 0.0194(7) -0.0055(6) 0.0040(5) -0.0055(6)

_geom_special_details
;
 All esds (except the esd in the dihedral angle between two l.s. planes)
 are estimated using the full covariance matrix.  The cell esds are taken
 into account individually in the estimation of esds in distances, angles
 and torsion angles; correlations between esds in cell parameters are only
 used when they are defined by crystal symmetry.  An approximate (isotropic)
 treatment of cell esds is used for estimating esds involving l.s. planes.
;
loop_
  _geom_bond_atom_site_label_1
  _geom_bond_atom_site_label_2
  _geom_bond_distance
  _geom_bond_site_symmetry_2
  _geom_bond_publ_flag
 S1 O1 1.4977(10) . ?
 S1 C1 1.7941(14) . ?
 S1 C8 1.7473(14) . ?
 C1 C2 1.3864(18) . ?
 C1 C6 1.3915(19) . ?
 C2 H2 0.9300 . ?
 C2 C3 1.3875(19) . ?
 C3 H3 0.9300 . ?
 C3 C4 1.3936(19) . ?
 C4 C5 1.396(2) . ?
 C4 C7 1.5067(19) . ?
 C5 H5 0.9300 . ?
 C5 C6 1.3890(19) . ?
 C6 H6 0.9300 . ?
 C7 H7A 0.9600 . ?
 C7 H7B 0.9600 . ?
 C7 H7C 0.9600 . ?
 C8 C9 1.5042(19) . ?
 C8 C10 1.5045(18) . ?
 C8 C11 1.5092(19) . ?
 C9 H9A 0.9700 . ?
 C9 H9B 0.9700 . ?
 C9 C10 1.489(2) . ?
 C10 H10 0.9800 . ?
 C10 C11 1.4901(19) . ?
 C11 H11A 0.9700 . ?
 C11 H11B 0.9700 . ?

loop_
  _geom_angle_atom_site_label_1
  _geom_angle_atom_site_label_2
  _geom_angle_atom_site_label_3
  _geom_angle
  _geom_angle_site_symmetry_1
  _geom_angle_site_symmetry_3
  _geom_angle_publ_flag
 O1 S1 C1 105.75(6) . . ?
 O1 S1 C8 108.52(6) . . ?
 C8 S1 C1 98.25(6) . . ?
 C2 C1 S1 118.65(10) . . ?
 C2 C1 C6 120.94(12) . . ?
 C6 C1 S1 120.40(10) . . ?
 C1 C2 H2 120.3 . . ?
 C1 C2 C3 119.37(12) . . ?
 C3 C2 H2 120.3 . . ?
 C2 C3 H3 119.4 . . ?
 C2 C3 C4 121.11(12) . . ?
 C4 C3 H3 119.4 . . ?
 C3 C4 C5 118.34(12) . . ?
 C3 C4 C7 120.44(13) . . ?
 C5 C4 C7 121.22(13) . . ?
 C4 C5 H5 119.3 . . ?
 C6 C5 C4 121.44(13) . . ?
 C6 C5 H5 119.3 . . ?
 C1 C6 H6 120.6 . . ?
 C5 C6 C1 118.79(12) . . ?
 C5 C6 H6 120.6 . . ?
 C4 C7 H7A 109.5 . . ?
 C4 C7 H7B 109.5 . . ?
 C4 C7 H7C 109.5 . . ?
 H7A C7 H7B 109.5 . . ?
 H7A C7 H7C 109.5 . . ?
 H7B C7 H7C 109.5 . . ?
 C9 C8 S1 132.51(10) . . ?
 C9 C8 C10 59.31(9) . . ?
 C9 C8 C11 98.01(11) . . ?
 C10 C8 S1 125.81(10) . . ?
 C10 C8 C11 59.27(9) . . ?
 C11 C8 S1 126.01(11) . . ?
 C8 C9 H9A 117.7 . . ?
 C8 C9 H9B 117.7 . . ?
 H9A C9 H9B 114.9 . . ?
 C10 C9 C8 60.35(9) . . ?
 C10 C9 H9A 117.7 . . ?
 C10 C9 H9B 117.7 . . ?
 C8 C10 H10 129.4 . . ?
 C9 C10 C8 60.34(9) . . ?
 C9 C10 H10 129.4 . . ?
 C9 C10 C11 99.56(12) . . ?
 C11 C10 C8 60.52(9) . . ?
 C11 C10 H10 129.4 . . ?
 C8 C11 H11A 117.8 . . ?
 C8 C11 H11B 117.7 . . ?
 C10 C11 C8 60.21(9) . . ?
 C10 C11 H11A 117.8 . . ?
 C10 C11 H11B 117.8 . . ?
 H11A C11 H11B 114.9 . . ?

loop_
  _geom_torsion_atom_site_label_1
  _geom_torsion_atom_site_label_2
  _geom_torsion_atom_site_label_3
  _geom_torsion_atom_site_label_4
  _geom_torsion
  _geom_torsion_site_symmetry_1
  _geom_torsion_site_symmetry_2
  _geom_torsion_site_symmetry_3
  _geom_torsion_site_symmetry_4
  _geom_torsion_publ_flag
 S1 C1 C2 C3 -179.58(10) . . . . ?
 S1 C1 C6 C5 179.05(10) . . . . ?
 S1 C8 C9 C10 -112.27(14) . . . . ?
 S1 C8 C10 C9 122.73(13) . . . . ?
 S1 C8 C10 C11 -114.49(14) . . . . ?
 S1 C8 C11 C10 114.17(13) . . . . ?
 O1 S1 C1 C2 13.10(12) . . . . ?
 O1 S1 C1 C6 -165.43(11) . . . . ?
 O1 S1 C8 C9 -93.11(14) . . . . ?
 O1 S1 C8 C10 -172.02(11) . . . . ?
 O1 S1 C8 C11 112.73(12) . . . . ?
 C1 S1 C8 C9 16.64(15) . . . . ?
 C1 S1 C8 C10 -62.27(13) . . . . ?
 C1 S1 C8 C11 -137.52(12) . . . . ?
 C1 C2 C3 C4 0.7(2) . . . . ?
 C2 C1 C6 C5 0.6(2) . . . . ?
 C2 C3 C4 C5 0.2(2) . . . . ?
 C2 C3 C4 C7 179.23(12) . . . . ?
 C3 C4 C5 C6 -0.7(2) . . . . ?
 C4 C5 C6 C1 0.3(2) . . . . ?
 C6 C1 C2 C3 -1.1(2) . . . . ?
 C7 C4 C5 C6 -179.74(13) . . . . ?
 C8 S1 C1 C2 -98.89(11) . . . . ?
 C8 S1 C1 C6 82.58(12) . . . . ?
 C8 C9 C10 C11 -47.92(10) . . . . ?
 C9 C8 C10 C11 122.78(12) . . . . ?
 C9 C8 C11 C10 -46.89(11) . . . . ?
 C9 C10 C11 C8 47.80(10) . . . . ?
 C11 C8 C9 C10 46.87(10) . . . . ?
 C11 C8 C10 C9 -122.78(12) . . . . ?

_shelx_res_file
;
TITL testm1 in P2(1)/c
    tb34a.res
    created by SHELXL-2017/1 at 09:44:12 on 15-Aug-2018
CELL 0.71073 6.2461 6.9103 22.7041 90 94.1036 90
ZERR 4 0.0002 0.0002 0.0006 0 0.0016 0
LATT 1
SYMM -X,0.5+Y,0.5-Z
SFAC C H O S
UNIT 44 48 4 4

L.S. 4 0 0
PLAN  5
BOND $H
CONF
fmap 2 53
acta
REM <olex2.extras>
REM <HklSrc "%.\\TB34A.hkl">
REM </olex2.extras>

WGHT    0.041300    0.555100
FVAR       0.28283
S1    4    0.031596    0.572616    0.420771    11.00000    0.01231    0.01726 =
         0.01678   -0.00027    0.00271   -0.00154
O1    3   -0.207907    0.590907    0.414967    11.00000    0.01134    0.03004 =
         0.02449   -0.00130    0.00403   -0.00291
C1    1    0.115734    0.584443    0.346940    11.00000    0.01346    0.01444 =
         0.01693   -0.00242    0.00226   -0.00126
C2    1   -0.030649    0.645725    0.302020    11.00000    0.01291    0.01508 =
         0.02110   -0.00143    0.00153    0.00091
AFIX  43
H2    2   -0.169141    0.680626    0.310285    11.00000   -1.20000
AFIX   0
C3    1    0.031445    0.654490    0.244615    11.00000    0.01853    0.01576 =
         0.01883    0.00052   -0.00086    0.00016
AFIX  43
H3    2   -0.066129    0.696914    0.214512    11.00000   -1.20000
AFIX   0
C4    1    0.237557    0.600797    0.231307    11.00000    0.02033    0.01446 =
         0.01955   -0.00258    0.00510   -0.00453
C5    1    0.380829    0.537114    0.277250    11.00000    0.01256    0.02167 =
         0.02428   -0.00551    0.00456   -0.00145
AFIX  43
H5    2    0.518417    0.499465    0.268951    11.00000   -1.20000
AFIX   0
C6    1    0.322387    0.528754    0.335081    11.00000    0.01366    0.02056 =
         0.02047   -0.00320   -0.00095    0.00140
AFIX  43
H6    2    0.419590    0.486705    0.365326    11.00000   -1.20000
AFIX   0
C7    1    0.301522    0.608790    0.168614    11.00000    0.02771    0.02511 =
         0.02193   -0.00129    0.00827   -0.00463
AFIX 137
H7A   2    0.248480    0.495978    0.147643    11.00000   -1.50000
H7B   2    0.455157    0.612837    0.168631    11.00000   -1.50000
H7C   2    0.241685    0.722649    0.149623    11.00000   -1.50000
AFIX   0
C8    1    0.140209    0.792157    0.446775    11.00000    0.01472    0.01944 =
         0.01828   -0.00315    0.00506   -0.00291
C9    1    0.219875    0.967680    0.415824    11.00000    0.02471    0.01942 =
         0.02548   -0.00116    0.00689   -0.00459
AFIX  23
H9A   2    0.223013    0.962174    0.373204    11.00000   -1.20000
H9B   2    0.185904    1.093791    0.431437    11.00000   -1.20000
AFIX   0
C10   1    0.374697    0.844172    0.451748    11.00000    0.01575    0.02447 =
         0.02351   -0.00490    0.00513   -0.00559
AFIX  13
H10   2    0.497982    0.770491    0.439486    11.00000   -1.20000
AFIX   0
C11   1    0.257385    0.825719    0.506356    11.00000    0.02151    0.02839 =
         0.01943   -0.00550    0.00398   -0.00552
AFIX  23
H11A  2    0.225757    0.943490    0.527300    11.00000   -1.20000
H11B  2    0.288358    0.713896    0.531353    11.00000   -1.20000
AFIX   0
HKLF 4


REM  testm1 in P2(1)/c
REM R1 =  0.0305 for    1953 Fo > 4sig(Fo)  and  0.0341 for all    2139 data
REM    119 parameters refined using      0 restraints

END

WGHT      0.0413      0.5551

REM Highest difference peak  0.337,  deepest hole -0.288,  1-sigma level  0.050
Q1    1   0.0689  0.4571  0.4359  11.00000  0.05    0.34
Q2    1   0.0675  0.6925  0.4320  11.00000  0.05    0.34
Q3    1   0.0363  0.5966  0.3232  11.00000  0.05    0.31
Q4    1   0.3007  0.5521  0.2557  11.00000  0.05    0.28
Q5    1   0.3290  0.4822  0.3017  11.00000  0.05    0.25
;
_shelx_res_checksum                21477
_shelx_hkl_file
;
   1   0   0  667.88   23.70
  -1   0   0  700.65   23.52
  -1   0   0  688.68   23.92
  -1   0   0  643.12   23.65
  -1   0   0  700.89   23.75
  -2   0   0   42.30    1.73
  -2   0   0   46.25    1.61
   2   0   0   43.55    1.71
  -2   0   0   46.91    1.71
  -2   0   0   42.94    1.66
  -3   0   0  157.19    5.28
  -3   0   0  149.84    5.45
  -3   0   0  152.89    5.42
   3   0   0  148.81    5.42
  -3   0   0  143.07    5.36
  -4   0   0   95.05    3.35
  -4   0   0   90.14    3.48
  -4   0   0   94.16    3.60
   4   0   0   92.46    3.55
  -4   0   0   92.55    3.53
  -5   0   0   64.89    2.84
   5   0   0   68.41    2.81
  -5   0   0   69.64    2.75
  -5   0   0   71.86    2.57
  -5   0   0   68.85    2.79
   6   0   0    4.74    0.64
  -6   0   0    4.60    0.56
  -6   0   0    4.69    0.61
  -6   0   0    5.48    0.73
  -7   0   0    0.20    0.28
  -7   0   0    1.24    0.44
   7   0   0   -0.35    0.35
  -7   0   0    0.33    0.38
   0  -1   0    0.11    0.03
   0  -1   0    0.17    0.04
   0   1   0    0.12    0.06
   0   1   0    0.25    0.07
   0   1   0    0.21    0.03
   0   1   0    0.06    0.02
   0   1   0    0.17    0.07
   1  -1   0  465.36   16.47
  -1  -1   0  473.69   16.59
  -1  -1   0  465.30   16.59
  -1  -1   0  505.92   16.69
  -1   1   0  508.08   16.91
   1   1   0  480.45   16.50
  -1   1   0  492.10   16.51
  -1   1   0  478.66   16.59
  -1   1   0  429.53   16.71
  -1   1   0  472.71   16.61
  -1   1   0  444.84   16.57
  -2  -1   0    1.53    0.24
  -2  -1   0    1.64    0.19
   2  -1   0    1.91    0.25
  -2  -1   0    2.05    0.30
  -2   1   0    1.68    0.24
  -2   1   0    1.52    0.20
  -2   1   0    1.64    0.29
   2   1   0    1.33    0.26
  -2   1   0    1.34    0.20
   3  -1   0    9.03    0.58
  -3  -1   0    8.77    0.58
  -3  -1   0    9.13    0.64
  -3  -1   0    8.00    0.50
  -3  -1   0    9.17    0.41
  -3   1   0    8.98    0.50
  -3   1   0    9.27    0.58
  -3   1   0    9.55    0.54
   3   1   0    9.54    0.61
  -3   1   0    9.00    0.65
   4  -1   0   33.85    1.49
  -4  -1   0   33.87    1.25
  -4  -1   0   33.61    1.49
  -4  -1   0   32.99    1.52
  -4  -1   0   31.88    1.41
  -4   1   0   33.55    1.36
   4   1   0   32.12    1.50
  -4   1   0   31.77    1.54
  -4   1   0   29.71    1.41
  -4   1   0   32.60    1.47
  -5  -1   0    3.68    0.56
  -5  -1   0    2.74    0.53
  -5  -1   0    3.88    0.48
   5  -1   0    3.41    0.53
  -5   1   0    3.12    0.60
   5   1   0    4.17    0.62
  -5   1   0    3.03    0.49
  -5   1   0    3.63    0.40
  -5   1   0    3.63    0.47
  -6  -1   0   -0.04    0.32
   6  -1   0    0.14    0.39
  -6  -1   0    0.27    0.37
  -6  -1   0    0.07    0.23
  -6   1   0    0.25    0.38
  -6   1   0    0.20    0.32
  -6   1   0    0.26    0.26
   6   1   0   -0.64    0.38
  -7  -1   0    0.03    0.26
  -7  -1   0    0.69    0.40
  -7  -1   0    0.25    0.39
   7   1   0    0.30    0.51
  -7   1   0    0.31    0.27
  -7   1   0    0.52    0.37
  -7   1   0   -0.21    0.33
   0  -2   0  334.50   11.95
   0  -2   0  333.53   11.74
   0   2   0  351.90   11.79
   0   2   0  347.66   11.76
   0   2   0  347.16   11.77
   0   2   0  321.66   11.86
   1  -2   0    1.64    0.14
  -1  -2   0    1.70    0.18
  -1  -2   0    1.59    0.18
  -1   2   0    1.35    0.21
   1   2   0    1.66    0.16
   1   2   0    1.69    0.22
  -1   2   0    1.98    0.28
  -1   2   0    1.37    0.14
  -1   2   0    1.29    0.17
  -1   2   0    1.45    0.22
  -1   2   0    1.18    0.17
   1   2   0    1.51    0.23
   1   2   0    1.79    0.21
  -2  -2   0    3.09    0.30
  -2  -2   0    3.30    0.29
   2  -2   0    2.61    0.25
  -2  -2   0    3.09    0.30
  -2   2   0    2.63    0.22
  -2   2   0    3.21    0.34
  -2   2   0    2.73    0.27
  -2   2   0    2.97    0.35
   2   2   0    2.69    0.32
  -2   2   0    2.38    0.30
  -2   2   0    2.31    0.26
  -3  -2   0   27.22    1.15
  -3  -2   0   27.81    1.22
  -3  -2   0   28.08    1.22
   3  -2   0   26.58    1.17
  -3   2   0   27.04    1.28
  -3   2   0   27.59    1.18
  -3   2   0   27.50    1.20
  -3   2   0   26.06    1.17
   3   2   0   27.65    1.25
  -3   2   0   27.50    1.19
   4  -2   0   12.04    0.75
  -4  -2   0   10.41    0.74
  -4  -2   0   10.48    0.76
  -4  -2   0    9.49    0.63
  -4   2   0    9.94    0.81
   4   2   0    9.86    0.76
  -4   2   0    9.67    0.67
  -4   2   0    9.22    0.71
  -4   2   0    8.93    0.64
  -4   2   0    9.64    0.62
  -5  -2   0   13.90    0.93
   5  -2   0   12.49    0.89
  -5  -2   0   13.73    0.82
  -5  -2   0   13.94    0.92
   5   2   0   13.79    1.01
  -5   2   0   11.99    0.93
  -5   2   0   14.13    0.79
  -5   2   0   13.19    0.87
  -5   2   0   12.87    0.80
  -5   2   0   13.34    0.86
  -6  -2   0    2.00    0.46
  -6  -2   0    1.15    0.35
  -6  -2   0    0.97    0.42
  -6   2   0    0.71    0.39
   6   2   0    1.83    0.53
  -6   2   0    0.71    0.36
  -6   2   0    0.81    0.37
  -7  -2   0    5.81    0.71
  -7  -2   0    6.75    0.85
   7   2   0    7.31    0.91
  -7   2   0    6.90    0.81
  -7   2   0    8.75    0.99
  -7   2   0    4.94    0.69
   0  -3   0    0.18    0.06
   0  -3   0   -0.05    0.08
   0   3   0   -0.06    0.18
   0   3   0    0.14    0.13
   0   3   0   -0.02    0.17
  -1  -3   0   67.34    2.42
  -1  -3   0   69.98    2.47
  -1   3   0   63.77    2.49
  -1   3   0   69.42    2.52
  -1   3   0   65.68    2.34
   1   3   0   71.32    2.44
  -1   3   0   68.35    2.50
  -1   3   0   64.13    2.57
  -1   3   0   68.99    2.58
   1   3   0   63.18    2.52
   1   3   0   65.21    2.46
  -1   3   0   68.18    2.35
   1   3   0   71.13    2.58
  -2  -3   0    2.64    0.27
   2  -3   0    1.79    0.21
  -2  -3   0    2.47    0.28
  -2  -3   0    2.52    0.25
   2   3   0    2.51    0.21
  -2   3   0    2.39    0.37
  -2   3   0    2.33    0.29
   2   3   0    2.58    0.31
  -2   3   0    2.41    0.36
  -2   3   0    2.08    0.18
  -2   3   0    2.67    0.25
   2   3   0    2.52    0.32
  -2   3   0    2.52    0.35
  -2   3   0    1.97    0.24
  -3  -3   0   31.37    1.36
  -3  -3   0   32.56    1.38
  -3  -3   0   31.99    1.34
   3  -3   0   28.21    1.30
  -3   3   0   31.57    1.29
  -3   3   0   30.56    1.43
   3   3   0   32.27    1.40
  -3   3   0   31.60    1.44
  -3   3   0   34.51    1.51
  -3   3   0   32.21    1.39
   3   3   0   35.37    1.45
  -3   3   0   30.00    1.31
   3   3   0   33.74    1.20
  -4  -3   0   99.78    3.63
  -4  -3   0   95.11    3.65
  -4  -3   0   93.08    3.60
   4  -3   0   98.16    3.71
  -4   3   0   99.56    3.60
  -4   3   0   92.55    3.77
  -4   3   0   87.27    3.63
  -4   3   0  102.19    3.68
  -4   3   0   95.47    3.68
   4   3   0   97.11    3.71
  -5  -3   0   26.21    1.40
  -5  -3   0   28.99    1.36
  -5  -3   0   32.01    1.41
  -5   3   0   27.04    1.37
  -5   3   0   27.89    1.36
   5   3   0   28.38    1.50
  -5   3   0   28.73    1.39
  -5   3   0   27.62    1.34
  -5   3   0   26.26    1.51
  -6  -3   0   13.67    0.96
  -6  -3   0   18.17    1.10
  -6   3   0   15.42    0.98
   6   3   0   15.88    0.98
  -6   3   0   15.99    1.04
   6   3   0   14.33    1.14
  -6   3   0   17.43    1.00
  -6   3   0   16.20    1.13
  -7  -3   0    6.20    0.75
  -7  -3   0    6.41    0.79
   7   3   0    4.01    0.75
  -7   3   0    6.41    0.87
  -7   3   0    5.84    0.77
  -7   3   0    5.29    0.67
   0  -4   0   96.83    3.39
   0  -4   0   96.98    3.52
   0   4   0  100.05    3.40
   0   4   0   94.64    3.42
   0   4   0   93.55    3.60
   0   4   0   96.92    3.69
   0   4   0  102.37    3.65
  -1  -4   0   62.53    2.28
   1   4   0   63.00    2.22
   1   4   0   62.68    2.44
   1   4   0   59.48    2.38
  -1   4   0   58.13    2.33
  -1   4   0   58.89    2.44
  -1   4   0   58.51    2.40
  -2  -4   0    5.04    0.38
  -2  -4   0    3.66    0.30
  -2  -4   0    4.29    0.38
   2   4   0    3.27    0.39
  -2   4   0    3.98    0.21
  -2   4   0    3.87    0.29
  -2   4   0    4.68    0.38
  -2   4   0    3.73    0.48
   2   4   0    5.14    0.45
  -2   4   0    4.29    0.55
  -2   4   0    3.66    0.45
  -2   4   0    3.41    0.39
  -3  -4   0   16.26    0.81
  -3  -4   0   14.23    0.80
  -3  -4   0   13.44    0.78
  -3   4   0   15.01    0.73
  -3   4   0   15.49    0.77
  -3   4   0   14.91    0.98
  -3   4   0   14.19    0.89
  -3   4   0   14.35    0.91
  -3   4   0   15.21    0.85
   3   4   0   16.85    0.90
   3   4   0   14.80    0.87
  -4  -4   0   27.05    1.25
  -4  -4   0   27.01    1.29
  -4   4   0   26.63    1.37
  -4   4   0   26.41    1.41
  -4   4   0   25.02    1.34
  -4   4   0   24.44    1.16
   4   4   0   25.59    1.30
  -4   4   0   27.18    1.31
   4   4   0   26.17    1.35
  -5  -4   0    6.35    0.63
  -5  -4   0    4.84    0.60
  -5   4   0    5.31    0.54
   5   4   0    4.81    0.65
  -5   4   0    5.51    0.67
  -5   4   0    7.38    0.86
  -5   4   0    6.32    0.70
   5   4   0    5.81    0.64
  -5   4   0    8.11    0.78
  -6  -4   0    0.14    0.27
  -6  -4   0   -0.17    0.33
  -6   4   0    0.24    0.29
  -6   4   0   -0.10    0.27
  -6   4   0    0.39    0.36
  -6   4   0    0.19    0.32
   6   4   0   -0.48    0.40
   6   4   0    0.29    0.29
  -7  -4   0    0.00    0.41
  -7  -4   0   -0.05    0.29
  -7   4   0   -0.36    0.28
  -7   4   0    0.45    0.41
   7   4   0   -0.27    0.48
  -7   4   0    0.05    0.32
   0  -5   0    0.20    0.16
   0   5   0    0.23    0.36
   0   5   0    0.10    0.07
   0   5   0   -0.39    0.22
   0   5   0   -0.01    0.19
   1  -5   0    9.30    0.57
  -1  -5   0    9.61    0.57
  -1   5   0    9.63    0.73
   1   5   0   10.00    0.50
   1   5   0    9.57    0.66
  -1   5   0    9.07    0.64
   1   5   0    9.56    0.83
  -1   5   0    8.71    0.83
  -2  -5   0    8.52    0.56
  -2   5   0    7.34    0.78
  -2   5   0    7.68    0.60
  -2   5   0    6.90    0.70
   2   5   0    7.94    0.55
  -2   5   0    7.80    0.57
   2   5   0    8.30    0.65
  -3  -5   0   14.28    0.81
  -3   5   0   13.72    0.79
  -3   5   0   12.13    0.94
  -3   5   0   13.24    0.94
  -3   5   0   14.07    0.62
   3   5   0   13.91    0.90
   3   5   0   14.76    0.83
  -3   5   0   15.16    0.88
  -4  -5   0   14.05    0.84
   4   5   0   12.82    0.91
   4   5   0   15.34    0.96
  -4   5   0   12.99    0.95
  -4   5   0   14.31    0.98
  -4   5   0   12.86    0.98
  -4   5   0   12.54    0.68
  -4   5   0   12.16    0.87
  -4   5   0   12.93    0.75
  -5  -5   0    5.13    0.57
  -5   5   0    5.92    0.72
  -5   5   0    4.60    0.63
   5   5   0    4.41    0.60
  -5   5   0    5.86    0.77
  -5   5   0    5.47    0.50
   5   5   0    5.52    0.70
  -5   5   0    6.56    0.82
  -6  -5   0    8.17    0.80
  -6   5   0    9.97    0.86
   6   5   0    7.95    0.81
   6   5   0    6.57    0.85
  -6   5   0    7.74    0.92
  -6   5   0    8.77    0.91
  -6   5   0    8.62    0.67
   0  -6   0   25.35    1.17
   0   6   0   27.65    1.49
   0   6   0   24.43    1.29
  -1  -6   0   40.24    1.67
   1  -6   0   38.10    1.66
   1   6   0   39.66    1.52
   1   6   0   39.79    1.82
  -1   6   0   38.95    1.84
  -1   6   0   40.08    1.79
  -1   6   0   38.69    1.93
   1   6   0   43.65    1.98
  -2  -6   0    2.65    0.38
   2  -6   0    4.07    0.45
   2   6   0    3.74    0.37
  -2   6   0    3.76    0.49
  -2   6   0    3.40    0.54
  -2   6   0    3.19    0.60
   2   6   0    3.70    0.53
  -3  -6   0   -0.05    0.22
  -3   6   0    0.19    0.36
  -3   6   0   -0.06    0.21
  -3   6   0   -0.38    0.39
  -3   6   0    0.09    0.25
   3   6   0   -0.38    0.20
   3   6   0    0.07    0.25
  -4  -6   0    8.19    0.70
  -4   6   0    8.51    0.76
   4   6   0    6.84    0.74
  -4   6   0    8.76    0.64
  -4   6   0    8.25    0.90
   4   6   0    7.53    0.71
  -4   6   0    7.67    0.92
  -5  -6   0    0.91    0.33
   5   6   0    1.01    0.40
  -5   6   0    1.06    0.50
  -5   6   0    0.72    0.38
   5   6   0   -0.06    0.36
  -5   6   0    0.85    0.37
   0  -7   0    0.38    0.22
   0   7   0    0.39    0.46
   0   7   0    0.03    0.26
  -1  -7   0    9.67    0.67
   1  -7   0    9.83    0.67
   1   7   0    9.37    0.80
  -1   7   0   10.06    1.08
  -1   7   0    9.82    0.78
  -2  -7   0    2.79    0.43
   2  -7   0    2.37    0.39
  -2   7   0    2.78    0.55
   2   7   0    1.96    0.45
   2   7   0    1.96    0.29
  -2   7   0    2.77    0.48
  -2   7   0    2.38    0.59
  -3  -7   0   -0.18    0.23
   3  -7   0    0.29    0.23
  -3   7   0    0.57    0.25
  -3   7   0   -0.19    0.33
  -3   7   0    0.39    0.47
   3   7   0   -0.12    0.21
   3   7   0   -0.13    0.26
  -4  -7   0    0.82    0.34
  -4   7   0    0.32    0.43
   4   7   0    1.04    0.40
  -4   7   0    1.03    0.39
   4   7   0    0.85    0.35
  -4   7   0    1.15    0.34
  -4   7   0    2.14    0.64
   0  -8   0   20.12    1.12
   0   8   0   23.22    1.35
   0   8   0   20.11    1.44
   1  -8   0   14.74    0.93
  -1  -8   0   16.57    0.97
  -1   8   0   16.40    1.35
  -1   8   0   17.64    1.14
   1   8   0   18.45    1.20
  -2  -8   0   10.50    0.76
   2  -8   0    7.98    0.70
   2   8   0   10.60    0.92
  -2   8   0   11.14    0.88
  -2   8   0   10.97    1.20
   3  -8   0    3.02    0.49
  -3  -8   0    3.23    0.52
   3   8   0    3.12    0.62
  -3   8   0    2.68    0.65
  -3   8   0    4.03    0.83
  -3   8   0    2.71    0.51
   8   0  -1   -0.37    0.51
   7   0  -1   -0.06    0.43
  -7   0   1   -0.71    0.30
  -7   0   1    0.27    0.29
  -7   0   1    0.51    0.39
   6   0  -1    0.32    0.43
  -6   0   1   -0.08    0.21
  -6   0   1   -0.34    0.34
  -6   0   1    0.14    0.36
  -5   0   1    0.77    0.43
  -5   0   1    0.39    0.35
   5   0  -1    0.20    0.38
  -5   0   1   -0.06    0.16
  -5   0   1    0.03    0.24
  -4   0   1    0.15    0.28
   4   0  -1   -0.31    0.28
  -4   0   1    0.06    0.13
  -4   0   1   -0.31    0.32
  -4   0   1    0.16    0.19
   3   0  -1    0.22    0.23
  -3   0   1   -0.07    0.10
  -3   0   1   -0.10    0.21
  -3   0   1   -0.07    0.26
  -3   0   1    0.08    0.12
  -2   0   1    0.11    0.08
   2   0  -1   -0.01    0.19
  -2   0   1    0.03    0.10
  -2   0   1    0.04    0.21
  -2   0   1   -0.01    0.18
  -1   0   1   -0.08    0.07
   1   0  -1    0.07    0.07
  -1   0   1    0.09    0.04
  -1   0   1    0.04    0.09
  -1   0   1    0.10    0.05
   0   0  -1    0.00    0.01
   0   0   1    0.00    0.01
   0   0   1    0.00    0.01
   0   0  -1    0.01    0.00
  -1   0  -1    0.06    0.05
  -1   0  -1   -0.01    0.07
  -1   0  -1    0.02    0.05
   1   0   1   -0.07    0.07
  -1   0  -1   -0.05    0.06
   2   0   1    0.50    0.20
  -3   0  -1    0.27    0.22
  -3   0  -1   -0.03    0.09
   3   0   1   -0.06    0.23
  -3   0  -1   -0.10    0.20
  -3   0  -1    0.13    0.13
  -4   0  -1   -0.18    0.22
  -4   0  -1   -0.01    0.15
  -4   0  -1    0.08    0.13
  -4   0  -1    0.01    0.27
   4   0   1    0.06    0.27
  -5   0  -1    0.10    0.31
  -5   0  -1    0.19    0.16
   5   0   1   -0.03    0.39
  -5   0  -1    0.08    0.19
  -5   0  -1   -0.24    0.30
   6   0   1    0.06    0.41
  -6   0  -1    0.37    0.36
  -6   0  -1    0.15    0.34
  -6   0  -1   -0.26    0.19
  -7   0  -1    0.02    0.36
  -7   0  -1    0.53    0.37
  -7   0  -1    0.26    0.29
   7   0   1   -0.16    0.42
  -7  -1   1   -0.45    0.35
  -7  -1   1    0.32    0.30
   7  -1  -1   -0.66    0.52
  -7  -1   1    0.38    0.36
   7   1  -1    0.33    0.50
  -7   1   1    0.58    0.33
  -7   1   1    0.38    0.38
  -7   1   1    1.12    0.43
  -6  -1   1    7.01    0.70
  -6  -1   1    6.13    0.77
  -6  -1   1    6.12    0.76
   6  -1  -1    5.61    0.69
  -6   1   1    7.95    0.78
  -6   1   1    6.23    0.70
  -6   1   1    5.59    0.63
   6   1  -1    8.21    0.85
  -5  -1   1    3.76    0.46
  -5  -1   1    4.85    0.66
   5  -1  -1    4.68    0.59
  -5  -1   1    4.94    0.63
  -5   1   1    3.59    0.39
   5   1  -1    4.55    0.63
  -5   1   1    3.43    0.45
  -5   1   1    3.22    0.58
  -5   1   1    3.29    0.53
  -4  -1   1   23.40    1.26
  -4  -1   1   25.44    1.24
  -4  -1   1   23.20    1.12
   4  -1  -1   25.42    1.21
  -4  -1   1   25.73    0.95
  -4   1   1   23.75    1.19
   4   1  -1   22.90    1.23
  -4   1   1   22.89    1.13
  -4   1   1   25.97    1.08
  -4   1   1   22.66    1.28
  -3  -1   1    0.88    0.20
  -3  -1   1    1.09    0.32
  -3  -1   1    0.80    0.26
  -3  -1   1    0.73    0.11
   3  -1  -1    0.98    0.26
  -3   1   1    0.98    0.21
  -3   1   1    0.54    0.28
  -3   1   1    1.51    0.29
   3   1  -1    0.87    0.28
  -3   1   1    0.94    0.19
   2  -1  -1  413.27   13.98
  -2  -1   1  404.83   14.21
  -2  -1   1  422.36   14.22
  -2  -1   1  418.03   14.02
  -2   1   1  364.63   13.95
  -2   1   1  419.07   14.13
  -2   1   1  400.30   13.99
  -2   1   1  414.91   14.33
   2   1  -1  387.05   14.01
  -2   1   1  399.04   14.17
   1  -1  -1    4.03    0.23
  -1  -1   1    4.01    0.23
  -1  -1   1    4.50    0.28
  -1  -1   1    4.19    0.22
  -1   1   1    4.19    0.24
  -1   1   1    4.67    0.32
   1   1  -1    3.92    0.28
  -1   1   1    4.52    0.21
   1   1  -1    4.05    0.25
  -1   1   1    4.18    0.26
   1   1  -1    4.26    0.24
  -1   1   1    4.07    0.23
  -1   1   1    4.07    0.26
  -1   1   1    3.61    0.23
   0  -1   1   85.58    3.09
   0  -1  -1   95.02    3.13
   0  -1  -1   88.01    3.10
   0  -1   1   88.84    3.08
   0  -1   1   97.82    3.11
   0   1   1   86.75    3.08
   0   1  -1   85.56    3.09
   0   1  -1   92.30    3.12
   0   1   1   85.00    3.13
   0   1  -1   87.69    3.11
   0   1  -1   84.43    3.13
   0   1   1   87.55    3.11
   0   1  -1   87.96    3.12
   0   1   1   94.46    3.08
   0   1   1   88.19    3.08
  -1  -1  -1  739.17   25.26
  -1  -1  -1  716.13   25.21
  -1  -1  -1  709.51   25.13
   1  -1   1  689.97   25.10
  -1   1  -1  718.06   25.12
  -1   1  -1  762.67   25.19
  -1   1  -1  674.68   25.13
  -1   1  -1  677.14   25.13
   1   1   1  767.59   25.24
   1   1   1  763.48   25.30
  -1   1  -1  768.63   25.46
  -1   1  -1  710.00   25.31
  -2  -1  -1   56.97    2.14
  -2  -1  -1   59.47    2.18
   2  -1   1   57.55    2.16
  -2  -1  -1   62.31    2.19
  -2   1  -1   54.69    2.16
  -2   1  -1   62.36    2.17
  -2   1  -1   55.80    2.15
  -2   1  -1   59.81    2.24
   2   1   1   57.61    2.20
  -3  -1  -1  131.49    4.68
  -3  -1  -1  128.81    4.71
  -3  -1  -1  135.10    4.73
   3  -1   1  130.70    4.71
   3   1   1  132.18    4.75
  -3   1  -1  125.68    4.65
  -3   1  -1  130.10    4.70
  -3   1  -1  128.05    4.69
  -3   1  -1  130.63    4.78
   4  -1   1  129.16    4.83
  -4  -1  -1  133.87    4.85
  -4  -1  -1  128.93    4.78
  -4  -1  -1  128.27    4.83
  -4  -1  -1  134.57    4.64
  -4   1  -1  130.18    4.73
  -4   1  -1  137.02    4.83
   4   1   1  131.06    4.88
  -4   1  -1  129.09    4.91
  -4   1  -1  129.10    4.81
   5  -1   1   16.50    1.02
  -5  -1  -1   16.87    1.02
  -5  -1  -1   16.49    1.01
  -5  -1  -1   16.42    0.93
   5   1   1   15.85    1.08
  -5   1  -1   16.05    0.94
  -5   1  -1   16.99    0.98
  -5   1  -1   16.41    0.84
  -5   1  -1   15.09    1.05
   6  -1   1   12.76    0.98
  -6  -1  -1   13.90    0.95
  -6  -1  -1   12.74    0.86
  -6  -1  -1   12.84    0.96
  -6   1  -1   13.31    0.93
   6   1   1   10.27    0.94
  -6   1  -1   13.39    1.00
  -6   1  -1   13.04    0.88
  -7  -1  -1    2.01    0.51
  -7  -1  -1    2.39    0.50
  -7  -1  -1    2.31    0.51
  -7   1  -1    1.38    0.42
  -7   1  -1    1.23    0.45
   7   1   1    1.61    0.55
  -7   1  -1    2.11    0.52
  -7  -2   1   19.09    1.17
  -7  -2   1   18.01    1.22
  -7   2   1   20.82    1.33
   7   2  -1   19.87    1.34
  -7   2   1   16.82    1.17
  -7   2   1   17.82    1.18
  -6  -2   1    4.55    0.56
  -6  -2   1    4.26    0.63
  -6  -2   1    2.91    0.58
   6   2  -1    4.74    0.73
  -6   2   1    4.30    0.68
  -6   2   1    2.98    0.53
  -6   2   1    3.68    0.54
  -5  -2   1   27.74    1.31
  -5  -2   1   27.83    1.44
  -5  -2   1   26.96    1.40
   5  -2  -1   26.83    1.38
  -5   2   1   25.84    1.23
  -5   2   1   28.03    1.29
  -5   2   1   26.66    1.33
  -5   2   1   29.30    1.40
  -5   2   1   26.83    1.49
   5   2  -1   27.58    1.46
  -4  -2   1  180.57    6.29
   4  -2  -1  177.75    6.21
  -4  -2   1  176.22    6.27
  -4  -2   1  168.26    6.17
   4   2  -1  171.27    6.28
  -4   2   1  169.17    6.20
  -4   2   1  162.40    6.13
  -4   2   1  173.47    6.22
  -4   2   1  173.14    6.19
  -4   2   1  166.35    6.33
  -3  -2   1  258.62    9.18
   3  -2  -1  275.24    9.20
  -3  -2   1  268.46    9.26
  -3  -2   1  272.90    9.26
  -3   2   1  272.17    9.21
  -3   2   1  236.04    9.18
  -3   2   1  262.26    9.33
  -3   2   1  237.56    9.20
  -3   2   1  264.87    9.21
   3   2  -1  272.72    9.27
  -2  -2   1   42.44    1.57
  -2  -2   1   41.11    1.56
   2  -2  -1   39.92    1.54
  -2  -2   1   44.72    1.62
  -2   2   1   41.96    1.67
   2   2  -1   40.48    1.59
   2   2  -1   42.12    1.62
  -2   2   1   39.91    1.52
  -2   2   1   42.08    1.59
  -2   2   1   39.65    1.61
  -2   2   1   36.99    1.54
  -2   2   1   40.35    1.62
   1  -2  -1    0.20    0.09
  -1  -2   1    0.41    0.14
  -1  -2   1    0.27    0.10
   1   2  -1    0.37    0.15
   1   2  -1    0.35    0.13
  -1   2   1    0.16    0.16
  -1   2   1    0.39    0.18
  -1   2   1    0.15    0.09
  -1   2   1    0.29    0.12
  -1   2   1    0.19    0.06
   1   2  -1    0.18    0.10
  -1   2   1    0.29    0.09
  -1   2   1    0.15    0.16
   1   2  -1    0.19    0.15
   0  -2  -1  996.91   33.25
   0  -2  -1  964.75   33.45
   0  -2   1  994.84   33.42
   0   2  -1  888.49   33.67
   0   2   1  891.79   33.54
   0   2   1  964.02   33.87
   0   2  -1  902.60   33.71
   0   2  -1 1000.00   34.09
   0   2   1  994.68   33.20
   0   2   1  995.85   33.19
   0   2   1  989.85   33.63
  -1  -2  -1  717.10   24.88
  -1  -2  -1  726.20   24.94
   1  -2   1  664.85   24.62
   1   2   1  761.48   25.02
  -1   2  -1  717.56   24.98
  -1   2  -1  731.23   24.96
  -1   2  -1  715.90   25.40
  -1   2  -1  684.26   25.32
  -1   2  -1  701.69   24.67
  -1   2  -1  718.97   24.96
  -2  -2  -1    1.10    0.19
  -2  -2  -1    0.87    0.20
   2  -2   1    0.82    0.18
  -2  -2  -1    0.86    0.19
  -2   2  -1    0.92    0.21
  -2   2  -1    0.87    0.15
  -2   2  -1    0.98    0.21
  -2   2  -1    0.88    0.23
  -2   2  -1    1.11    0.18
  -2   2  -1    1.37    0.22
   2   2   1    0.84    0.23
   3  -2   1    1.33    0.27
  -3  -2  -1    1.92    0.26
  -3  -2  -1    2.08    0.33
  -3  -2  -1    1.48    0.29
  -3   2  -1    1.40    0.33
  -3   2  -1    2.28    0.31
  -3   2  -1    1.78    0.28
  -3   2  -1    1.60    0.26
   3   2   1    2.40    0.37
  -3   2  -1    1.61    0.28
  -4  -2  -1    0.41    0.27
  -4  -2  -1    0.11    0.19
  -4  -2  -1   -0.03    0.28
   4  -2   1    0.03    0.29
  -4   2  -1    0.05    0.29
  -4   2  -1    0.19    0.21
  -4   2  -1    0.09    0.20
  -4   2  -1    0.32    0.27
   4   2   1    0.28    0.32
  -4   2  -1    0.14    0.20
   5  -2   1   -0.62    0.31
  -5  -2  -1    0.34    0.24
  -5  -2  -1    0.04    0.32
  -5  -2  -1    0.19    0.30
  -5   2  -1   -0.16    0.21
  -5   2  -1   -0.06    0.23
  -5   2  -1   -0.22    0.26
  -5   2  -1    0.40    0.24
   5   2   1   -0.24    0.37
  -5   2  -1    0.39    0.26
  -5   2  -1    0.17    0.31
  -6  -2  -1    0.04    0.24
  -6  -2  -1   -0.27    0.27
  -6  -2  -1    0.38    0.31
  -6   2  -1    0.07    0.28
  -6   2  -1   -0.10    0.29
  -6   2  -1   -0.15    0.27
  -6   2  -1    0.25    0.25
   6   2   1   -0.51    0.37
  -7  -2  -1   11.28    1.03
  -7  -2  -1   14.86    1.00
   7   2   1    9.96    1.07
  -7   2  -1   13.68    1.10
  -7   2  -1   14.44    1.02
  -7   2  -1   13.26    0.97
  -7  -3   1   -0.15    0.41
  -7  -3   1    0.20    0.31
   7   3  -1    0.28    0.52
  -7   3   1    0.43    0.35
  -7   3   1    0.38    0.36
  -7   3   1    0.82    0.48
  -6  -3   1    0.98    0.39
  -6  -3   1    0.68    0.32
  -6   3   1    0.93    0.45
  -6   3   1    0.75    0.35
   6   3  -1    0.43    0.28
  -6   3   1    0.86    0.35
   6   3  -1    0.19    0.41
  -6   3   1    0.33    0.33
  -5  -3   1    1.79    0.44
  -5  -3   1    1.75    0.34
  -5  -3   1    1.52    0.41
  -5   3   1    2.32    0.54
  -5   3   1    1.73    0.39
  -5   3   1    1.64    0.38
  -5   3   1    2.52    0.43
   5   3  -1    1.18    0.41
   5   3  -1    1.88    0.37
  -5   3   1    1.79    0.39
  -4  -3   1   13.45    0.90
  -4  -3   1   15.91    0.90
   4  -3  -1   13.72    0.81
  -4  -3   1   14.49    0.79
   4   3  -1   14.40    0.95
   4   3  -1   13.87    0.82
  -4   3   1   13.07    0.85
  -4   3   1   13.34    0.83
  -4   3   1   14.07    0.84
  -4   3   1   13.75    0.97
  -4   3   1   12.54    0.81
   3  -3  -1   -0.12    0.20
  -3  -3   1    0.40    0.29
  -3  -3   1    0.41    0.24
  -3  -3   1    0.25    0.18
  -3   3   1    0.05    0.21
   3   3  -1    0.28    0.29
  -3   3   1    0.00    0.26
  -3   3   1   -0.07    0.23
  -3   3   1    0.46    0.27
   3   3  -1    0.11    0.11
  -3   3   1    0.29    0.13
   3   3  -1    0.27    0.19
  -3   3   1    0.13    0.18
  -2  -3   1    8.96    0.48
  -2  -3   1    9.19    0.53
  -2  -3   1   10.30    0.52
   2  -3  -1    9.31    0.47
   2   3  -1   10.19    0.59
  -2   3   1    9.86    0.55
  -2   3   1    9.59    0.50
   2   3  -1    9.75    0.57
  -2   3   1    8.92    0.43
  -2   3   1    9.39    0.49
  -2   3   1    8.32    0.59
   2   3  -1   10.00    0.46
  -2   3   1    9.04    0.63
  -2   3   1   10.02    0.63
  -1  -3   1   19.77    0.83
  -1  -3   1   22.09    0.88
   1  -3  -1   21.21    0.79
  -1   3   1   21.33    0.92
  -1   3   1   21.44    0.79
  -1   3   1   21.22    0.98
   1   3  -1   22.03    0.92
  -1   3   1   20.09    0.90
   1   3  -1   18.76    0.93
  -1   3   1   20.74    1.01
   1   3  -1   22.16    0.87
  -1   3   1   21.82    0.91
   1   3  -1   21.83    0.89
   0  -3   1   91.18    3.19
   0  -3  -1   94.80    3.23
   0  -3   1   89.87    3.28
   0  -3  -1   89.49    3.30
   0   3   1   95.43    3.23
   0   3   1   94.90    3.23
   0   3  -1   88.36    3.21
   0   3  -1   94.80    3.39
   0   3   1   88.58    3.36
   0   3   1   96.29    3.39
   0   3  -1   91.89    3.42
   0   3  -1   91.05    3.36
   0   3  -1   93.91    3.20
   0   3   1   90.38    3.42
  -1  -3  -1    0.50    0.12
  -1  -3  -1    0.13    0.11
   1   3   1    0.16    0.16
  -1   3  -1    0.21    0.22
  -1   3  -1    0.20    0.14
   1   3   1    0.19    0.13
  -1   3  -1    0.19    0.12
  -1   3  -1    0.33    0.21
  -2  -3  -1   11.65    0.59
  -2  -3  -1   12.20    0.59
   2  -3   1   10.32    0.51
  -2  -3  -1   10.68    0.53
  -2   3  -1   10.67    0.51
   2   3   1   12.12    0.49
  -2   3  -1   10.56    0.69
  -2   3  -1   12.99    0.64
   2   3   1   10.85    0.65
   2   3   1   11.81    0.65
  -2   3  -1   11.53    0.59
  -2   3  -1   10.52    0.66
  -2   3  -1   11.45    0.66
  -3  -3  -1   58.75    2.25
  -3  -3  -1   60.73    2.29
  -3  -3  -1   60.30    2.31
   3  -3   1   55.91    2.22
  -3   3  -1   60.51    2.33
  -3   3  -1   59.24    2.37
   3   3   1   62.95    2.37
  -3   3  -1   58.45    2.23
  -3   3  -1   59.61    2.42
   3   3   1   59.23    2.09
  -3   3  -1   55.18    2.35
  -3   3  -1   60.15    2.24
  -4  -3  -1    0.31    0.22
  -4  -3  -1    0.27    0.30
  -4  -3  -1    0.68    0.30
  -4   3  -1    0.42    0.29
  -4   3  -1    0.17    0.34
   4   3   1    0.79    0.36
  -4   3  -1    0.44    0.25
  -4   3  -1    0.73    0.27
  -4   3  -1    0.73    0.32
  -5  -3  -1   11.34    0.85
  -5  -3  -1   11.55    0.77
  -5   3  -1   12.01    0.78
  -5   3  -1   12.30    0.81
  -5   3  -1   11.21    0.80
  -5   3  -1   11.52    0.82
  -5   3  -1   11.58    0.93
   5   3   1   11.77    0.95
  -6  -3  -1    1.60    0.38
  -6  -3  -1    1.85    0.45
  -6   3  -1    2.12    0.45
   6   3   1    1.90    0.56
  -6   3  -1    1.96    0.41
  -6   3  -1    2.47    0.53
  -6   3  -1    2.27    0.44
  -7  -3  -1    2.73    0.62
  -7  -3  -1    3.16    0.55
  -7   3  -1    3.08    0.54
  -7   3  -1    3.18    0.67
  -7   3  -1    2.52    0.54
   7   3   1    1.31    0.63
  -7  -4   1    4.99    0.70
  -7  -4   1    3.95    0.69
   7   4  -1    3.06    0.66
  -7   4   1    2.66    0.51
  -7   4   1    4.82    0.81
  -7   4   1    3.30    0.59
  -6  -4   1    6.43    0.71
  -6  -4   1    7.43    0.82
  -6   4   1    6.23    0.71
   6   4  -1    6.23    0.70
  -6   4   1    8.40    0.98
  -6   4   1    7.25    0.69
   6   4  -1    6.48    0.83
  -6   4   1    6.16    0.74
  -5  -4   1    8.21    0.73
  -5  -4   1    8.15    0.67
  -5   4   1    7.74    0.70
   5   4  -1    7.96    0.69
  -5   4   1    7.55    0.66
  -5   4   1    8.20    0.81
   5   4  -1    7.07    0.79
  -5   4   1    6.74    0.83
  -5   4   1    7.03    0.75
  -4  -4   1   23.39    1.14
  -4  -4   1   23.65    1.19
  -4   4   1   23.40    1.12
   4   4  -1   23.12    1.25
  -4   4   1   23.75    1.29
  -4   4   1   21.51    1.25
   4   4  -1   24.36    1.21
  -4   4   1   24.66    1.21
  -4   4   1   22.70    1.28
  -3  -4   1   88.44    3.36
  -3  -4   1   90.96    3.40
  -3  -4   1   94.91    3.42
   3   4  -1   94.17    3.46
  -3   4   1   93.11    3.47
   3   4  -1   95.06    3.50
  -3   4   1   89.93    3.57
  -3   4   1   81.11    3.51
  -3   4   1   94.65    3.38
  -3   4   1   91.24    3.56
   3   4  -1   93.67    3.29
  -3   4   1   88.17    3.32
  -2  -4   1    0.71    0.21
   2  -4  -1    0.55    0.16
  -2  -4   1    0.53    0.18
   2   4  -1    0.87    0.21
  -2   4   1    0.71    0.17
  -2   4   1    0.36    0.20
  -2   4   1    0.42    0.27
  -2   4   1    0.94    0.36
  -2   4   1    0.52    0.19
  -2   4   1    0.40    0.25
   2   4  -1    0.37    0.22
   2   4  -1    0.42    0.23
  -1  -4   1   12.07    0.57
  -1  -4   1   13.03    0.63
  -1   4   1   13.83    0.85
  -1   4   1   13.29    0.51
  -1   4   1   14.54    0.82
   1   4  -1   13.38    0.60
  -1   4   1   11.62    0.68
   1   4  -1   12.59    0.72
   0  -4  -1   95.17    3.49
   0  -4  -1   95.94    3.61
   0  -4   1   97.17    3.59
   0   4  -1   99.40    3.48
   0   4   1  102.31    3.73
   0   4   1  103.72    3.80
   0   4  -1  101.44    3.47
   0   4  -1  104.58    3.73
   0   4   1   98.38    3.70
   0   4  -1  101.72    3.71
   0   4   1  102.08    3.50
   0   4  -1   97.20    3.76
  -1  -4  -1    9.66    0.48
  -1  -4  -1    9.80    0.54
  -1   4  -1    9.96    0.70
  -1   4  -1    9.53    0.73
   1   4   1   10.43    0.50
  -1   4  -1    9.41    0.58
   1   4   1   10.65    0.65
  -2  -4  -1   11.35    0.52
  -2  -4  -1   11.40    0.60
  -2  -4  -1   12.34    0.64
   2   4   1   13.20    0.67
  -2   4  -1   11.36    0.47
  -2   4  -1   11.13    0.81
  -2   4  -1   11.33    0.45
  -2   4  -1   10.31    0.63
  -2   4  -1   11.30    0.68
   2   4   1   12.94    0.74
  -2   4  -1   11.17    0.75
  -3  -4  -1   26.57    1.22
  -3  -4  -1   27.25    1.22
   3   4   1   27.54    1.31
  -3   4  -1   26.79    1.10
  -3   4  -1   26.88    1.19
  -3   4  -1   27.01    1.28
  -3   4  -1   28.01    1.38
   3   4   1   28.55    1.29
  -3   4  -1   27.11    1.36
  -3   4  -1   26.54    1.33
  -4  -4  -1   62.70    2.52
  -4  -4  -1   64.79    2.54
   4   4   1   64.51    2.61
   4   4   1   62.29    2.58
  -4   4  -1   63.97    2.69
  -4   4  -1   61.34    2.58
  -4   4  -1   58.56    2.60
  -4   4  -1   64.51    2.41
  -4   4  -1   65.97    2.66
  -5  -4  -1    5.62    0.61
  -5  -4  -1    5.63    0.65
  -5   4  -1    5.19    0.63
  -5   4  -1    4.83    0.62
  -5   4  -1    4.74    0.68
   5   4   1    4.91    0.59
  -5   4  -1    3.93    0.55
   5   4   1    4.69    0.66
  -5   4  -1    4.45    0.48
  -6  -4  -1    3.11    0.50
  -6  -4  -1    2.30    0.49
  -6   4  -1    2.53    0.53
  -6   4  -1    1.96    0.39
  -6   4  -1    2.85    0.61
  -6   4  -1    2.62    0.52
   6   4   1    2.32    0.48
   6   4   1    1.99    0.56
  -7  -4  -1    6.71    0.81
  -7  -4  -1    4.76    0.69
  -7   4  -1    5.58    0.65
   7   4   1    3.78    0.78
  -7   4  -1    5.97    0.79
  -7   4  -1    6.06    0.87
  -6  -5   1    0.86    0.36
  -6   5   1    1.37    0.43
   6   5  -1    0.25    0.45
  -6   5   1    0.82    0.41
   6   5  -1    0.94    0.39
  -6   5   1    1.63    0.47
  -6   5   1    0.92    0.33
  -5  -5   1    1.31    0.35
  -5   5   1    1.52    0.32
   5   5  -1    1.39    0.48
  -5   5   1    1.45    0.45
  -5   5   1    1.10    0.45
  -5   5   1    2.35    0.50
  -5   5   1    1.12    0.36
   5   5  -1    1.54    0.42
  -4  -5   1    0.62    0.27
  -4   5   1    0.68    0.35
  -4   5   1    0.74    0.24
  -4   5   1    0.76    0.43
   4   5  -1    0.86    0.36
  -4   5   1    1.27    0.26
   4   5  -1    0.61    0.30
  -4   5   1    0.94    0.32
  -4   5   1    1.00    0.41
  -3  -5   1    1.16    0.27
   3   5  -1    1.01    0.32
   3   5  -1    0.94    0.32
  -3   5   1    0.97    0.42
  -3   5   1    1.28    0.36
  -3   5   1    0.96    0.37
  -3   5   1    0.87    0.20
  -3   5   1    1.34    0.28
  -3   5   1    1.21    0.32
  -2  -5   1    2.08    0.32
   2   5  -1    2.22    0.39
  -2   5   1    1.73    0.42
  -2   5   1    1.81    0.32
   2   5  -1    2.73    0.33
  -2   5   1    2.50    0.19
  -2   5   1    2.88    0.41
  -2   5   1    2.19    0.50
   1  -5  -1   19.82    0.92
  -1  -5   1   18.27    0.89
   1   5  -1   18.72    0.80
  -1   5   1   18.81    0.98
   1   5  -1   18.08    1.12
   1   5  -1   20.32    1.03
  -1   5   1   19.59    1.09
  -1   5   1   18.14    1.16
   0  -5   1   98.59    3.58
   0  -5  -1   95.29    3.58
   0   5  -1   93.37    3.79
   0   5   1   99.23    3.43
   0   5  -1  100.38    3.71
   0   5   1  105.39    3.86
   0   5   1   90.36    3.68
   0   5  -1   97.09    3.39
   0   5  -1   98.31    3.72
  -1  -5  -1  106.04    3.91
   1  -5   1  105.42    3.89
   1   5   1  103.45    4.03
  -1   5  -1  109.94    4.08
  -1   5  -1  106.86    4.00
   1   5   1  107.67    3.81
  -1   5  -1  105.80    4.13
  -2  -5  -1   21.89    1.04
  -2   5  -1   21.34    1.20
  -2   5  -1   21.24    1.10
  -2   5  -1   23.70    1.11
   2   5   1   22.27    1.17
  -2   5  -1   20.63    1.23
   2   5   1   22.88    1.02
  -3  -5  -1    0.05    0.20
   3   5   1    0.23    0.24
   3   5   1    0.02    0.23
  -3   5  -1    0.37    0.24
  -3   5  -1    0.51    0.36
  -3   5  -1    0.36    0.19
  -3   5  -1    0.28    0.11
  -3   5  -1    0.35    0.37
  -4  -5  -1   16.12    0.91
  -4   5  -1   14.78    1.04
  -4   5  -1   14.80    1.06
  -4   5  -1   14.71    0.72
   4   5   1   15.16    0.96
  -4   5  -1   15.26    0.97
  -4   5  -1   14.59    0.83
   4   5   1   16.25    0.99
  -5  -5  -1   26.68    1.33
  -5   5  -1   25.31    1.44
  -5   5  -1   25.92    1.16
   5   5   1   27.20    1.43
  -5   5  -1   29.29    1.53
   5   5   1   24.68    1.41
  -5   5  -1   23.18    1.42
  -5   5  -1   23.55    1.37
  -6  -5  -1    0.30    0.32
  -6   5  -1    0.11    0.24
   6   5   1    0.22    0.34
   6   5   1   -0.17    0.41
  -6   5  -1    0.76    0.38
  -6   5  -1   -0.12    0.33
  -5  -6   1    2.09    0.43
   5   6  -1    2.36    0.51
   5   6  -1    1.27    0.46
  -5   6   1    2.61    0.56
  -5   6   1    2.87    0.52
  -5   6   1    1.93    0.57
  -4  -6   1    0.15    0.23
   4   6  -1    0.00    0.30
  -4   6   1    0.08    0.18
  -4   6   1    0.06    0.24
   4   6  -1   -0.26    0.25
  -4   6   1   -0.08    0.40
  -4   6   1    0.12    0.38
  -3  -6   1   13.59    0.80
  -3   6   1   12.74    1.01
  -3   6   1   13.15    0.87
  -3   6   1   13.20    0.82
   3   6  -1   10.92    0.77
  -3   6   1   12.94    0.98
   3   6  -1   14.31    0.94
  -2  -6   1    0.20    0.20
   2  -6  -1    0.17    0.19
  -2   6   1    0.32    0.24
  -2   6   1    0.22    0.41
   2   6  -1    0.26    0.19
  -2   6   1    0.15    0.33
   2   6  -1    0.26    0.28
  -1  -6   1    6.44    0.50
   1  -6  -1    6.40    0.50
   1   6  -1    5.68    0.38
  -1   6   1    5.77    0.67
  -1   6   1    6.62    0.82
   1   6  -1    5.03    0.73
   1   6  -1    6.53    0.66
  -1   6   1    6.13    0.61
   0  -6   1    1.97    0.31
   0  -6  -1    1.47    0.29
   0   6  -1    2.79    0.45
   0   6   1    2.52    0.43
   0   6   1    2.09    0.18
   0   6  -1    1.77    0.38
   0   6  -1    1.35    0.45
   0   6   1    2.79    0.59
   1  -6   1    6.08    0.48
  -1  -6  -1    5.45    0.52
  -1   6  -1    5.07    0.56
   1   6   1    5.33    0.38
   1   6   1    6.01    0.63
  -1   6  -1    6.29    0.77
  -1   6  -1    6.87    0.73
   2  -6   1   12.69    0.73
  -2  -6  -1   12.17    0.75
  -2   6  -1   12.27    0.80
  -2   6  -1   10.62    0.87
   2   6   1   12.21    0.87
  -2   6  -1   11.40    1.00
   2   6   1   11.62    0.67
  -3  -6  -1    0.04    0.22
  -3   6  -1    0.28    0.43
  -3   6  -1    0.21    0.22
  -3   6  -1    0.46    0.36
   3   6   1    0.08    0.23
   3   6   1   -0.05    0.26
  -3   6  -1    0.47    0.29
  -4  -6  -1   40.55    1.77
   4   6   1   40.69    1.92
   4   6   1   36.66    1.76
  -4   6  -1   36.57    1.84
  -4   6  -1   37.68    1.72
  -4   6  -1   40.28    1.99
  -4   6  -1   38.76    1.98
  -5  -6  -1    2.58    0.47
   5   6   1    2.03    0.50
  -5   6  -1    4.00    0.69
  -5   6  -1    3.05    0.63
  -5   6  -1    3.07    0.54
   5   6   1    1.98    0.49
  -4  -7   1    0.35    0.29
   4   7  -1   -0.13    0.28
  -4   7   1   -0.03    0.48
   4   7  -1    0.76    0.37
  -4   7   1   -0.02    0.36
  -3  -7   1    2.78    0.44
   3  -7  -1    3.22    0.48
   3   7  -1    1.94    0.36
   3   7  -1    2.19    0.48
  -3   7   1    2.14    0.55
  -3   7   1    2.20    0.64
  -3   7   1    2.66    0.45
  -2  -7   1    4.16    0.51
   2  -7  -1    5.76    0.60
  -2   7   1    6.04    0.67
  -2   7   1    3.86    0.71
   2   7  -1    4.39    0.41
  -2   7   1    5.60    0.76
   2   7  -1    5.47    0.68
   1  -7  -1   11.68    0.74
  -1  -7   1   11.26    0.73
   1   7  -1   12.05    0.88
   1   7  -1    9.97    0.96
  -1   7   1   12.24    1.10
  -1   7   1   10.73    0.82
   0  -7   1   34.46    1.53
   0  -7  -1   33.18    1.54
   0   7   1   34.19    1.70
   0   7   1   36.27    1.92
   0   7  -1   37.63    1.88
   0   7  -1   34.95    1.72
  -1  -7  -1   21.38    1.13
   1  -7   1   22.57    1.12
  -1   7  -1   22.44    1.27
  -1   7  -1   22.91    1.44
  -1   7  -1   25.06    1.39
   1   7   1   24.16    1.33
   2  -7   1   20.82    1.11
  -2  -7  -1   20.07    1.11
   2   7   1   20.75    1.01
  -2   7  -1   23.44    1.25
   2   7   1   23.18    1.31
  -2   7  -1   23.02    1.47
  -2   7  -1   24.01    1.39
  -3  -7  -1   34.44    1.64
   3  -7   1   34.61    1.62
  -3   7  -1   36.14    1.91
   3   7   1   31.23    1.54
   3   7   1   38.07    1.85
  -3   7  -1   36.86    1.97
  -3   7  -1   39.79    1.75
  -4  -7  -1   21.51    1.20
  -4   7  -1   21.73    1.47
  -4   7  -1   21.65    1.19
  -4   7  -1   21.73    1.31
  -4   7  -1   21.47    1.40
   4   7   1   19.04    1.14
   4   7   1   21.06    1.34
  -3  -8   1    0.86    0.35
   3  -8  -1    0.63    0.31
   3   8  -1    1.12    0.47
  -3   8   1    1.33    0.40
  -3   8   1    0.66    0.55
   2  -8  -1    4.07    0.54
  -2  -8   1    6.11    0.63
  -2   8   1    5.86    0.73
  -2   8   1    4.93    0.88
   2   8  -1    5.11    0.70
  -1  -8   1    1.17    0.32
   1  -8  -1    0.71    0.29
   1   8  -1    0.60    0.34
  -1   8   1    1.60    0.61
  -1   8   1    0.80    0.35
   0  -8  -1    0.95    0.31
   0  -8   1    1.26    0.32
   0   8  -1    0.48    0.54
   0   8   1    1.36    0.41
   0   8  -1    1.39    0.41
   1  -8   1    0.33    0.21
  -1  -8  -1    0.08    0.23
  -1   8  -1    0.01    0.27
  -1   8  -1    0.53    0.53
   1   8   1    0.41    0.33
  -2  -8  -1    7.78    0.75
   2  -8   1    7.89    0.65
   2   8   1    6.50    0.79
  -2   8  -1    8.14    0.84
  -2   8  -1    9.81    1.18
  -2   8  -1    9.50    1.00
   3  -8   1   12.25    0.89
  -3  -8  -1   13.17    0.93
  -3   8  -1   15.72    1.36
  -3   8  -1   16.71    1.08
   3   8   1   15.28    1.13
  -3   8  -1   14.95    1.22
   8   0  -2    6.09    0.91
  -8   0   2    7.77    0.87
   7   0  -2    3.47    0.68
  -7   0   2    4.84    0.64
  -7   0   2    5.03    0.72
  -7   0   2    4.55    0.71
   6   0  -2    8.06    0.81
  -6   0   2    7.45    0.77
  -6   0   2    8.08    0.88
  -6   0   2    8.50    0.71
  -5   0   2    6.78    0.77
  -5   0   2    6.67    0.59
  -5   0   2    7.57    0.75
   5   0  -2    8.25    0.77
   4   0  -2   28.69    1.31
  -4   0   2   26.30    1.29
  -4   0   2   29.23    1.10
  -4   0   2   26.09    1.37
  -4   0   2   26.42    1.23
  -3   0   2  465.07   15.62
  -3   0   2  438.67   15.62
   3   0  -2  442.56   15.53
  -3   0   2  448.75   15.55
  -3   0   2  438.56   15.49
  -2   0   2  104.39    3.76
  -2   0   2  110.82    3.65
  -2   0   2  100.96    3.72
   2   0  -2  105.26    3.76
  -2   0   2  101.68    3.83
  -1   0   2   15.11    0.60
   1   0  -2   16.12    0.61
  -1   0   2   15.07    0.64
  -1   0   2   14.41    0.58
   1   0  -2   14.52    0.53
   0   0  -2    0.03    0.02
   0   0   2    0.12    0.03
   0   0  -2    0.36    0.04
  -1   0  -2  107.17    3.83
   1   0   2  115.90    3.84
  -1   0  -2  104.76    3.83
  -1   0  -2  111.50    3.84
  -2   0  -2    3.87    0.32
  -2   0  -2    3.07    0.26
   2   0   2    3.88    0.34
  -2   0  -2    3.05    0.23
  -2   0  -2    3.43    0.33
  -3   0  -2   63.03    2.35
  -3   0  -2   60.00    2.21
   3   0   2   58.85    2.33
  -3   0  -2   57.30    2.27
  -3   0  -2   61.30    2.31
   4   0   2   64.30    2.66
  -4   0  -2   71.62    2.52
  -4   0  -2   64.18    2.60
  -4   0  -2   68.46    2.63
  -4   0  -2   67.68    2.69
  -5   0  -2    7.91    0.71
  -5   0  -2    8.06    0.50
  -5   0  -2    7.27    0.59
  -5   0  -2    6.49    0.65
   5   0   2    6.57    0.68
  -6   0  -2    9.07    0.80
  -6   0  -2    8.88    0.73
   6   0   2   10.35    0.93
  -6   0  -2    8.39    0.79
   7   0   2    2.97    0.66
  -7   0  -2    4.70    0.67
  -7   0  -2    4.74    0.64
  -7   0  -2    3.95    0.62
  -7  -1   2   -0.14    0.39
   7  -1  -2   -0.14    0.43
  -7  -1   2    0.49    0.42
  -7  -1   2   -0.48    0.22
  -7   1   2    0.06    0.27
  -7   1   2    0.17    0.35
   7   1  -2   -0.73    0.41
  -7   1   2    0.54    0.45
  -6  -1   2    3.57    0.60
  -6  -1   2    4.35    0.55
   6  -1  -2    4.56    0.64
  -6  -1   2    5.30    0.74
  -6   1   2    3.78    0.52
  -6   1   2    5.61    0.78
  -6   1   2    4.29    0.61
   6   1  -2    3.84    0.61
   5  -1  -2   15.89    1.00
  -5  -1   2   14.82    1.06
  -5  -1   2   15.55    1.03
  -5  -1   2   15.83    0.89
  -5   1   2   14.03    1.03
  -5   1   2   15.75    0.99
  -5   1   2   14.66    0.77
  -5   1   2   14.69    0.89
   5   1  -2   14.38    1.02
  -4  -1   2    1.41    0.15
  -4  -1   2    1.51    0.46
  -4  -1   2    1.34    0.28
   4  -1  -2    1.27    0.36
  -4  -1   2    1.37    0.40
  -4   1   2    1.30    0.36
  -4   1   2    1.47    0.23
  -4   1   2    0.71    0.42
  -4   1   2    1.02    0.23
   4   1  -2    1.04    0.38
  -4   1   2    1.25    0.27
  -3  -1   2   11.12    0.43
  -3  -1   2   10.91    0.74
   3  -1  -2   11.49    0.65
  -3  -1   2   10.80    0.58
  -3  -1   2   11.25    0.67
  -3   1   2   11.14    0.56
  -3   1   2   11.57    0.67
   3   1  -2   10.58    0.68
  -3   1   2   10.18    0.51
  -3   1   2   10.03    0.75
  -3   1   2    9.80    0.58
   2  -1  -2   45.93    1.78
  -2  -1   2   48.09    1.84
  -2  -1   2   46.93    1.76
  -2  -1   2   49.64    1.83
  -2   1   2   48.23    1.73
  -2   1   2   49.02    1.80
   2   1  -2   46.56    1.82
  -2   1   2   45.53    1.88
  -2   1   2   44.80    1.75
  -1  -1   2  240.83    8.24
  -1  -1   2  226.02    8.17
   1  -1  -2  232.93    8.28
   1   1  -2  240.31    8.15
  -1   1   2  223.07    8.30
   1   1  -2  240.95    8.34
   1   1  -2  258.39    8.27
  -1   1   2  250.42    8.20
   1   1  -2  244.89    8.17
  -1   1   2  233.65    8.14
  -1   1   2  229.58    8.18
  -1   1   2  222.67    8.16
  -1   1   2  222.11    8.22
   0  -1  -2  328.48   11.40
   0  -1  -2  337.68   11.39
   0  -1   2  321.06   11.31
   0  -1  -2  317.75   11.41
   0  -1   2  330.11   11.33
   0   1  -2  330.36   11.55
   0   1  -2  330.26   11.33
   0   1  -2  327.43   11.52
   0   1  -2  327.58   11.59
   0   1   2  308.25   11.44
   0   1   2  333.58   11.36
   0   1   2  338.42   11.43
   0   1  -2  317.65   11.44
  -1  -1  -2   45.10    1.69
   1  -1   2   47.05    1.66
  -1  -1  -2   49.22    1.64
  -1  -1  -2   47.11    1.69
   1   1   2   44.19    1.65
  -1   1  -2   45.93    1.65
  -1   1  -2   46.69    1.69
   1   1   2   47.21    1.70
  -1   1  -2   46.85    1.72
  -1   1  -2   48.60    1.69
  -1   1  -2   44.94    1.66
  -1   1  -2   46.93    1.73
  -1   1  -2   46.56    1.70
   2  -1   2   15.43    0.69
  -2  -1  -2   14.40    0.65
  -2  -1  -2   16.03    0.70
  -2  -1  -2   14.86    0.67
  -2   1  -2   14.73    0.67
  -2   1  -2   14.45    0.72
  -2   1  -2   13.46    0.66
   2   1   2   14.67    0.73
  -2   1  -2   15.12    0.67
  -3  -1  -2    8.97    0.58
  -3  -1  -2   10.88    0.60
   3  -1   2    8.91    0.60
  -3  -1  -2    9.48    0.54
  -3   1  -2    9.56    0.58
   3   1   2    9.81    0.64
  -3   1  -2    8.69    0.36
  -3   1  -2    9.67    0.62
  -3   1  -2    8.96    0.54
  -3   1  -2    9.13    0.51
  -4  -1  -2    3.24    0.45
  -4  -1  -2    3.49    0.28
  -4  -1  -2    3.84    0.48
   4  -1   2    4.01    0.50
  -4  -1  -2    3.00    0.37
   4   1   2    3.59    0.53
  -4   1  -2    3.76    0.37
  -4   1  -2    3.31    0.40
  -4   1  -2    3.57    0.44
  -4   1  -2    2.94    0.48
  -5  -1  -2   11.18    0.79
   5  -1   2   10.32    0.83
  -5  -1  -2   11.09    0.83
  -5  -1  -2   11.39    0.75
  -5  -1  -2   11.41    0.58
   5   1   2   10.83    0.87
  -5   1  -2   11.20    0.79
  -5   1  -2    9.83    0.81
  -5   1  -2   10.82    0.74
  -5   1  -2   11.05    0.66
  -6  -1  -2    1.47    0.45
  -6  -1  -2    1.13    0.32
  -6  -1  -2    1.18    0.39
   6  -1   2    1.13    0.47
   6   1   2    1.55    0.55
  -6   1  -2    0.93    0.33
  -6   1  -2    0.79    0.37
  -6   1  -2    2.38    0.52
  -7  -1  -2    0.42    0.35
  -7  -1  -2    0.11    0.30
  -7  -1  -2    0.75    0.37
   7   1   2    0.14    0.50
  -7   1  -2    0.34    0.35
  -7   1  -2    0.20    0.35
  -7   1  -2    0.59    0.31
  -7  -2   2   11.86    1.05
  -7  -2   2   12.24    0.92
  -7  -2   2   12.74    1.00
  -7   2   2   12.63    1.10
  -7   2   2   10.15    0.99
  -7   2   2   12.05    0.95
   7   2  -2   12.09    1.12
  -6  -2   2    6.07    0.74
  -6  -2   2    5.73    0.76
  -6  -2   2    4.72    0.57
  -6   2   2    4.96    0.72
   6   2  -2    6.93    0.82
  -6   2   2    5.62    0.66
  -6   2   2    4.84    0.63
   5  -2  -2    0.17    0.34
  -5  -2   2    0.11    0.31
  -5  -2   2   -0.34    0.37
  -5  -2   2    0.26    0.23
  -5   2   2   -0.09    0.28
  -5   2   2   -0.02    0.22
  -5   2   2    0.32    0.27
   5   2  -2    0.35    0.40
  -5   2   2   -0.08    0.33
  -4  -2   2    1.06    0.25
  -4  -2   2    0.73    0.11
   4  -2  -2    0.70    0.31
  -4  -2   2    0.72    0.35
  -4  -2   2    0.44    0.42
  -4   2   2    1.06    0.29
  -4   2   2    0.50    0.30
  -4   2   2    0.36    0.39
  -4   2   2    0.97    0.28
  -4   2   2    0.18    0.24
   4   2  -2    0.74    0.38
  -3  -2   2    3.42    0.34
   3  -2  -2    2.89    0.35
  -3  -2   2    3.96    0.43
  -3  -2   2    3.08    0.43
  -3   2   2    2.59    0.32
  -3   2   2    2.85    0.37
  -3   2   2    3.11    0.47
   3   2  -2    3.75    0.35
   3   2  -2    3.46    0.42
  -3   2   2    3.20    0.36
  -3   2   2    2.75    0.35
  -2  -2   2   46.36    1.74
   2  -2  -2   44.48    1.74
  -2  -2   2   47.86    1.76
  -2  -2   2   46.93    1.81
   2   2  -2   47.89    1.81
  -2   2   2   47.76    1.88
  -2   2   2   46.60    1.76
  -2   2   2   46.02    1.70
  -2   2   2   45.66    1.79
  -2   2   2   47.20    1.75
  -2   2   2   44.90    1.81
   2   2  -2   45.48    1.77
  -1  -2   2   34.88    1.31
  -1  -2   2   34.76    1.28
   1  -2  -2   34.22    1.26
   1   2  -2   35.28    1.30
  -1   2   2   34.22    1.25
   1   2  -2   35.18    1.30
  -1   2   2   33.99    1.30
   1   2  -2   32.32    1.34
   1   2  -2   34.04    1.34
  -1   2   2   33.44    1.26
  -1   2   2   34.79    1.30
  -1   2   2   36.14    1.38
  -1   2   2   34.45    1.36
   1   2  -2   34.61    1.31
  -1   2   2   33.96    1.37
   0  -2   2   30.50    1.13
   0  -2  -2   34.04    1.17
   0  -2   2   32.39    1.17
   0  -2  -2   32.55    1.20
   0   2  -2   33.53    1.25
   0   2  -2   30.66    1.13
   0   2  -2   33.80    1.29
   0   2   2   30.94    1.28
   0   2   2   32.55    1.24
   0   2   2   32.69    1.17
   0   2  -2   26.96    1.12
   0   2  -2   31.01    1.24
   0   2   2   34.37    1.17
   0   2   2   33.17    1.17
  -1  -2  -2  307.26   10.45
   1  -2   2  299.23   10.42
  -1  -2  -2  255.23   10.53
  -1  -2  -2  305.02   10.44
   1   2   2  325.65   10.55
  -1   2  -2  312.92   10.52
  -1   2  -2  299.54   10.52
  -1   2  -2  288.64   10.47
  -1   2  -2  321.84   10.48
  -1   2  -2  305.49   10.49
  -2  -2  -2   41.20    1.59
   2  -2   2   39.87    1.54
  -2  -2  -2   41.13    1.57
  -2  -2  -2   43.83    1.53
  -2   2  -2   39.04    1.62
   2   2   2   42.43    1.63
  -2   2  -2   40.06    1.56
  -2   2  -2   41.80    1.61
  -2   2  -2   41.58    1.53
  -2   2  -2   43.18    1.67
  -2   2  -2   37.70    1.61
  -3  -2  -2   12.48    0.67
   3  -2   2   12.22    0.69
  -3  -2  -2   14.74    0.69
  -3  -2  -2   13.22    0.71
  -3   2  -2   12.69    0.67
  -3   2  -2   12.54    0.71
  -3   2  -2   13.99    0.72
   3   2   2   14.15    0.77
  -3   2  -2   11.34    0.68
  -3   2  -2   14.27    0.81
  -4  -2  -2  118.49    4.46
   4  -2   2  117.55    4.43
  -4  -2  -2  123.49    4.42
  -4  -2  -2  122.14    4.44
  -4   2  -2  121.31    4.41
  -4   2  -2  120.60    4.46
  -4   2  -2  119.31    4.56
   4   2   2  116.79    4.51
  -4   2  -2  122.76    4.43
  -4   2  -2  119.83    4.43
  -4   2  -2  119.77    4.47
   5  -2   2   38.67    1.80
  -5  -2  -2   45.63    1.83
  -5  -2  -2   42.53    1.87
  -5  -2  -2   40.84    1.80
  -5   2  -2   40.25    1.78
  -5   2  -2   37.64    1.81
  -5   2  -2   41.76    1.76
  -5   2  -2   40.19    1.76
  -5   2  -2   43.53    1.97
  -5   2  -2   42.36    1.85
   5   2   2   39.26    1.92
  -6  -2  -2   16.67    1.11
  -6  -2  -2   18.56    1.08
  -6  -2  -2   18.22    1.06
  -6   2  -2   17.13    1.05
  -6   2  -2   16.31    1.16
  -6   2  -2   18.97    1.11
  -6   2  -2   17.31    1.09
  -6   2  -2   18.03    0.99
   6   2   2   16.36    1.17
  -7  -2  -2    5.34    0.72
  -7  -2  -2    5.14    0.67
  -7   2  -2    5.80    0.79
   7   2   2    4.70    0.79
  -7   2  -2    5.66    0.74
  -7   2  -2    4.03    0.61
  -7  -3   2    5.28    0.66
  -7  -3   2    3.65    0.68
  -7   3   2    5.18    0.80
  -7   3   2    4.24    0.64
   7   3  -2    4.43    0.71
  -7   3   2    3.31    0.59
  -6  -3   2   19.67    1.13
  -6  -3   2   19.26    1.23
  -6   3   2   18.11    1.15
   6   3  -2   20.61    1.26
  -6   3   2   20.38    1.14
  -6   3   2   20.26    1.16
  -6   3   2   19.39    1.32
  -5  -3   2   76.65    2.98
  -5  -3   2   77.75    3.07
  -5  -3   2   76.72    3.06
  -5   3   2   77.55    3.20
  -5   3   2   68.98    2.98
   5   3  -2   75.72    2.95
  -5   3   2   72.39    3.15
  -5   3   2   73.01    2.98
  -5   3   2   75.37    3.01
   5   3  -2   79.13    3.12
  -4  -3   2   60.32    2.34
   4  -3  -2   57.74    2.33
  -4  -3   2   61.01    2.43
  -4  -3   2   62.74    2.46
  -4   3   2   57.18    2.41
  -4   3   2   60.96    2.55
   4   3  -2   58.24    2.44
  -4   3   2   55.21    2.36
   4   3  -2   57.84    2.34
  -4   3   2   59.02    2.37
  -4   3   2   60.75    2.39
  -3  -3   2   73.94    2.70
  -3  -3   2   70.96    2.62
   3  -3  -2   71.76    2.61
  -3  -3   2   68.27    2.65
  -3   3   2   70.20    2.63
  -3   3   2   67.80    2.54
   3   3  -2   72.06    2.71
  -3   3   2   71.82    2.67
  -3   3   2   66.43    2.72
  -3   3   2   64.38    2.75
  -3   3   2   64.69    2.69
   3   3  -2   71.38    2.67
  -2  -3   2   31.85    1.33
   2  -3  -2   32.28    1.26
  -2  -3   2   33.12    1.28
  -2  -3   2   32.84    1.29
  -2   3   2   32.48    1.42
  -2   3   2   31.28    1.26
   2   3  -2   33.90    1.27
  -2   3   2   32.81    1.42
  -2   3   2   33.31    1.34
   2   3  -2   33.14    1.37
  -2   3   2   30.40    1.28
   2   3  -2   34.13    1.36
  -2   3   2   32.01    1.41
  -1  -3   2    6.72    0.36
   1  -3  -2    6.74    0.31
  -1  -3   2    6.08    0.35
  -1   3   2    6.08    0.30
   1   3  -2    6.58    0.42
  -1   3   2    6.25    0.42
   1   3  -2    6.87    0.40
  -1   3   2    6.33    0.47
   1   3  -2    6.51    0.47
  -1   3   2    5.93    0.51
   1   3  -2    5.25    0.41
  -1   3   2    5.99    0.29
   1   3  -2    6.41    0.39
  -1   3   2    6.35    0.40
  -1   3   2    6.30    0.40
   0  -3  -2  304.70   10.23
   0  -3  -2  295.21   10.30
   0  -3   2  294.36   10.27
   0   3  -2  274.04   10.35
   0   3  -2  286.64   10.24
   0   3   2  297.18   10.23
   0   3  -2  306.64   10.38
   0   3  -2  301.49   10.42
   0   3  -2  300.75   10.26
   0   3  -2  298.10   10.37
   0   3   2  304.17   10.28
   0   3   2  306.65   10.44
   0   3   2  287.14   10.35
  -1  -3  -2  465.38   15.95
  -1   3  -2  464.14   15.91
   1   3   2  473.99   15.79
   1   3   2  445.46   15.88
  -1   3  -2  470.59   15.85
  -1   3  -2  439.79   15.92
  -1   3  -2  443.27   15.85
   2  -3   2   14.15    0.61
  -2  -3  -2   15.63    0.71
  -2  -3  -2   14.59    0.71
  -2  -3  -2   14.89    0.61
  -2   3  -2   15.35    0.79
  -2   3  -2   14.74    0.74
  -2   3  -2   14.01    0.70
  -2   3  -2   15.09    0.61
   2   3   2   16.73    0.77
  -2   3  -2   14.19    0.79
  -2   3  -2   14.12    0.81
  -3  -3  -2    0.17    0.18
   3  -3   2    0.28    0.20
  -3  -3  -2    0.43    0.20
  -3  -3  -2   -0.15    0.19
   3   3   2    0.18    0.29
  -3   3  -2    0.57    0.25
  -3   3  -2    0.06    0.18
  -3   3  -2    0.16    0.13
  -3   3  -2    0.03    0.16
  -3   3  -2   -0.07    0.23
  -3   3  -2    0.24    0.27
  -4  -3  -2    0.67    0.27
  -4  -3  -2    0.36    0.29
  -4  -3  -2    0.64    0.23
  -4   3  -2    0.39    0.34
  -4   3  -2    0.48    0.27
  -4   3  -2    0.72    0.31
  -4   3  -2    0.41    0.26
  -4   3  -2    0.55    0.24
   4   3   2    1.25    0.42
  -5  -3  -2    3.08    0.44
  -5  -3  -2    2.39    0.46
   5   3   2    2.40    0.53
  -5   3  -2    2.72    0.52
  -5   3  -2    3.01    0.47
  -5   3  -2    2.53    0.40
  -5   3  -2    2.70    0.44
  -5   3  -2    2.57    0.45
  -6  -3  -2    3.26    0.50
  -6  -3  -2    3.85    0.58
  -6   3  -2    2.68    0.48
  -6   3  -2    3.29    0.50
   6   3   2    3.10    0.63
  -6   3  -2    3.15    0.60
  -6   3  -2    2.84    0.47
  -7  -3  -2   24.95    1.47
  -7  -3  -2   27.28    1.55
  -7   3  -2   28.97    1.66
  -7   3  -2   27.10    1.43
  -7   3  -2   25.33    1.50
   7   3   2   27.43    1.66
  -7  -4   2    0.10    0.31
  -7  -4   2   -0.36    0.38
  -7   4   2   -0.62    0.28
  -7   4   2    0.43    0.44
  -7   4   2   -0.39    0.27
   7   4  -2    0.06    0.49
  -6  -4   2    0.73    0.32
  -6  -4   2   -0.61    0.31
  -6   4   2    0.03    0.27
  -6   4   2    0.77    0.38
   6   4  -2    0.11    0.29
  -6   4   2   -0.30    0.30
   6   4  -2   -0.61    0.37
  -6   4   2   -0.43    0.26
  -5  -4   2    1.68    0.35
  -5  -4   2    1.13    0.40
  -5   4   2    1.28    0.35
   5   4  -2    1.31    0.36
  -5   4   2    1.73    0.49
  -5   4   2    1.43    0.43
  -5   4   2    1.22    0.42
  -5   4   2    1.78    0.39
   5   4  -2    1.26    0.47
  -4  -4   2   14.84    0.90
  -4  -4   2   13.66    0.81
   4   4  -2   15.65    0.96
  -4   4   2   13.28    0.81
  -4   4   2   13.22    0.98
  -4   4   2   13.59    0.93
   4   4  -2   15.77    0.90
  -4   4   2   16.28    0.90
  -4   4   2   12.56    0.90
  -3  -4   2   10.42    0.65
  -3  -4   2    9.46    0.60
  -3  -4   2    9.77    0.65
  -3   4   2    9.71    0.78
  -3   4   2    9.43    0.61
   3   4  -2    8.96    0.66
   3   4  -2   10.42    0.54
  -3   4   2    9.25    0.72
   3   4  -2   10.24    0.72
  -3   4   2    8.69    0.77
  -3   4   2   10.75    0.67
  -3   4   2   10.15    0.57
  -2  -4   2    1.94    0.27
   2  -4  -2    2.48    0.24
  -2  -4   2    2.10    0.28
  -2   4   2    1.98    0.36
  -2   4   2    2.44    0.46
  -2   4   2    2.17    0.24
   2   4  -2    2.64    0.38
  -2   4   2    2.18    0.30
  -2   4   2    1.99    0.17
  -2   4   2    2.07    0.29
  -2   4   2    2.23    0.40
   2   4  -2    2.08    0.32
   2   4  -2    2.48    0.31
   1  -4  -2    1.10    0.13
   1  -4  -2    0.95    0.19
  -1  -4   2    0.76    0.15
  -1  -4   2    0.72    0.17
   1   4  -2    0.92    0.30
   1   4  -2    0.76    0.23
   1   4  -2    0.76    0.23
  -1   4   2    0.71    0.27
  -1   4   2    0.96    0.13
  -1   4   2    0.70    0.20
   1   4  -2    1.33    0.20
  -1   4   2    1.15    0.35
   1   4  -2    1.04    0.25
  -1   4   2    0.92    0.22
   1   4  -2    1.30    0.23
   0  -4  -2    5.19    0.37
   0  -4  -2    5.28    0.28
   0  -4   2    5.01    0.35
   0   4   2    5.35    0.31
   0   4  -2    5.17    0.43
   0   4  -2    5.50    0.47
   0   4   2    5.16    0.57
   0   4  -2    5.53    0.58
   0   4   2    4.97    0.29
   0   4  -2    5.64    0.23
   0   4   2    5.53    0.45
  -1  -4  -2  131.17    4.77
  -1  -4  -2  132.03    4.71
   1   4   2  140.05    4.72
   1   4   2  130.04    4.86
  -1   4  -2  132.47    4.90
  -1   4  -2  137.49    4.85
  -1   4  -2  128.64    4.94
  -2  -4  -2    0.09    0.15
  -2  -4  -2    0.07    0.16
  -2   4  -2    0.28    0.20
   2   4   2    0.49    0.25
   2   4   2    0.05    0.20
  -2   4  -2    0.45    0.18
  -2   4  -2    0.43    0.29
  -2   4  -2    0.14    0.24
  -3  -4  -2   22.77    1.09
  -3  -4  -2   23.89    1.10
  -3   4  -2   24.40    1.26
  -3   4  -2   24.44    1.17
   3   4   2   23.62    1.20
  -3   4  -2   23.83    1.27
  -3   4  -2   22.37    0.96
   3   4   2   25.60    1.18
  -3   4  -2   23.33    1.09
  -4  -4  -2    4.75    0.52
  -4  -4  -2    5.24    0.52
  -4   4  -2    4.10    0.40
  -4   4  -2    3.87    0.56
   4   4   2    4.26    0.54
  -4   4  -2    5.26    0.59
  -4   4  -2    4.38    0.61
  -4   4  -2    6.03    0.68
   4   4   2    5.26    0.62
  -5  -4  -2    0.49    0.28
  -5  -4  -2   -0.01    0.29
  -5   4  -2    0.22    0.29
  -5   4  -2    0.35    0.28
   5   4   2    0.63    0.42
  -5   4  -2    0.11    0.31
  -5   4  -2    0.42    0.32
  -5   4  -2   -0.12    0.20
   5   4   2    0.16    0.30
  -6  -4  -2    0.01    0.31
  -6  -4  -2   -0.15    0.23
  -6   4  -2   -0.02    0.28
  -6   4  -2   -0.26    0.23
  -6   4  -2   -0.38    0.28
   6   4   2   -0.72    0.39
  -6   4  -2    0.29    0.31
   6   4   2   -0.22    0.28
  -7  -4  -2    5.26    0.71
  -7  -4  -2    5.89    0.76
   7   4   2    5.24    0.82
  -7   4  -2    5.86    0.65
  -7   4  -2    5.13    0.73
  -7   4  -2    6.81    0.89
  -6  -5   2    3.66    0.56
  -6   5   2    2.65    0.54
  -6   5   2    2.84    0.46
   6   5  -2    1.55    0.56
   6   5  -2    2.41    0.49
  -6   5   2    2.87    0.53
  -6   5   2    2.85    0.62
  -5  -5   2   17.46    1.01
   5   5  -2   19.57    1.11
  -5   5   2   15.39    0.91
  -5   5   2   17.34    1.15
  -5   5   2   17.10    1.17
  -5   5   2   15.96    1.13
  -5   5   2   15.89    1.05
   5   5  -2   15.50    1.11
  -4  -5   2   15.15    0.89
   4   5  -2   14.80    0.99
   4   5  -2   15.42    0.97
  -4   5   2   14.08    1.04
  -4   5   2   15.13    0.94
  -4   5   2   14.74    0.80
  -4   5   2   14.49    1.07
  -4   5   2   15.79    0.81
  -4   5   2   16.61    1.06
  -3  -5   2    5.84    0.49
  -3   5   2    5.79    0.48
  -3   5   2    6.28    0.76
  -3   5   2    5.47    0.44
   3   5  -2    6.74    0.66
  -3   5   2    6.64    0.63
   3   5  -2    6.35    0.59
  -3   5   2    5.01    0.64
  -3   5   2    5.04    0.54
  -2  -5   2   28.29    1.28
  -2   5   2   29.68    1.15
   2   5  -2   31.54    1.33
  -2   5   2   29.72    1.38
  -2   5   2   29.15    1.54
   2   5  -2   29.32    1.42
   2   5  -2   30.60    1.26
  -2   5   2   28.53    1.46
  -2   5   2   30.37    1.35
  -1  -5   2    4.43    0.40
   1  -5  -2    3.89    0.40
   1   5  -2    4.20    0.48
  -1   5   2    4.14    0.59
   1   5  -2    4.36    0.32
  -1   5   2    4.48    0.48
  -1   5   2    3.97    0.25
   1   5  -2    4.98    0.63
   1   5  -2    4.70    0.50
  -1   5   2    4.52    0.55
   0  -5   2   72.68    2.74
   0  -5  -2   73.09    2.78
   0   5   2   74.81    3.00
   0   5   2   71.73    2.88
   0   5  -2   73.98    2.89
   0   5  -2   73.64    2.97
   0   5  -2   75.68    2.91
   0   5   2   73.10    2.63
  -1  -5  -2   49.12    1.90
   1  -5   2   47.58    1.86
   1   5   2   48.97    1.80
  -1   5  -2   47.12    2.11
  -1   5  -2   47.36    2.05
   1   5   2   46.22    2.02
  -1   5  -2   44.60    1.96
  -2  -5  -2   15.34    0.82
   2   5   2   16.33    0.94
   2   5   2   16.09    0.80
  -2   5  -2   14.95    1.04
  -2   5  -2   14.99    0.86
  -2   5  -2   14.19    0.83
  -2   5  -2   14.25    0.94
  -3  -5  -2    3.81    0.45
   3   5   2    3.32    0.48
   3   5   2    3.81    0.46
  -3   5  -2    2.83    0.45
  -3   5  -2    3.88    0.44
  -3   5  -2    3.58    0.62
  -3   5  -2    2.58    0.48
  -4  -5  -2    1.29    0.33
   4   5   2    1.32    0.39
  -4   5  -2    1.35    0.21
  -4   5  -2    1.25    0.34
  -4   5  -2    1.41    0.47
  -4   5  -2    1.47    0.30
  -4   5  -2    1.73    0.46
   4   5   2    1.16    0.36
  -5  -5  -2    4.68    0.56
  -5   5  -2    5.32    0.69
  -5   5  -2    4.32    0.64
  -5   5  -2    5.37    0.73
   5   5   2    4.12    0.62
  -5   5  -2    5.12    0.44
   5   5   2    5.63    0.69
  -6  -5  -2   -0.29    0.26
  -6   5  -2    0.16    0.26
  -6   5  -2    0.29    0.34
   6   5   2    0.51    0.46
  -6   5  -2   -0.15    0.31
   6   5   2   -0.25    0.29
  -5  -6   2    0.54    0.29
  -5   6   2    1.65    0.52
   5   6  -2    0.06    0.36
  -5   6   2    0.09    0.39
  -5   6   2    0.76    0.37
   5   6  -2   -0.01    0.28
  -5   6   2    0.35    0.32
  -4  -6   2    1.98    0.38
   4   6  -2    1.93    0.44
  -4   6   2    1.43    0.48
  -4   6   2    1.43    0.38
   4   6  -2    2.10    0.45
  -4   6   2    2.61    0.59
  -3  -6   2    3.12    0.43
   3   6  -2    2.86    0.47
   3   6  -2    2.82    0.41
  -3   6   2    3.41    0.67
  -3   6   2    2.95    0.47
  -3   6   2    1.78    0.46
  -3   6   2    3.22    0.45
   2  -6  -2    6.88    0.56
  -2  -6   2    7.60    0.55
  -2   6   2    6.54    0.58
  -2   6   2    7.27    0.86
   2   6  -2    5.89    0.48
  -2   6   2    6.88    0.77
   2   6  -2    7.12    0.72
  -1  -6   2   59.93    2.27
   1  -6  -2   55.72    2.28
   1   6  -2   55.92    2.42
  -1   6   2   56.64    2.56
   1   6  -2   57.61    2.10
  -1   6   2   57.79    2.40
   1   6  -2   57.89    2.53
   0  -6  -2    6.64    0.53
   0  -6   2    5.79    0.48
   0   6   2    6.84    0.67
   0   6  -2    7.89    0.73
   0   6   2    6.84    0.36
   0   6  -2    8.59    0.76
   0   6  -2    5.66    0.71
   0   6   2    6.02    0.74
   1  -6   2   16.92    0.83
  -1  -6  -2   15.77    0.86
   1   6   2   15.04    0.73
  -1   6  -2   16.57    1.04
  -1   6  -2   15.66    1.11
  -1   6  -2   14.07    0.92
   1   6   2   16.10    0.98
  -2  -6  -2  119.83    4.56
   2  -6   2  125.18    4.54
  -2   6  -2  118.53    4.76
   2   6   2  118.39    4.47
  -2   6  -2  123.66    4.84
   2   6   2  128.08    4.76
  -2   6  -2  129.98    4.68
  -3  -6  -2   71.55    2.83
  -3   6  -2   76.39    2.90
   3   6   2   76.05    3.03
  -3   6  -2   64.98    2.90
   3   6   2   69.29    2.78
  -3   6  -2   70.44    3.04
  -3   6  -2   72.06    3.11
  -4  -6  -2   45.78    1.98
  -4   6  -2   42.99    1.93
  -4   6  -2   47.49    2.22
   4   6   2   42.84    1.97
   4   6   2   46.15    2.13
  -4   6  -2   46.44    2.18
  -4   6  -2   41.51    2.04
  -5  -6  -2   31.54    1.63
  -5   6  -2   33.46    1.73
  -5   6  -2   33.60    1.83
   5   6   2   36.66    1.81
   5   6   2   32.60    1.69
  -5   6  -2   33.43    1.80
  -4  -7   2    1.21    0.37
   4   7  -2    1.09    0.41
  -4   7   2    1.30    0.59
  -4   7   2    0.70    0.47
   4   7  -2    0.96    0.37
   3  -7  -2    2.87    0.43
  -3  -7   2    1.58    0.36
  -3   7   2    2.07    0.40
   3   7  -2    1.61    0.34
  -3   7   2    1.61    0.58
  -3   7   2    1.30    0.46
   3   7  -2    2.05    0.47
  -2  -7   2    0.13    0.22
   2  -7  -2    0.26    0.22
  -2   7   2    0.24    0.27
   2   7  -2    0.01    0.18
   2   7  -2    0.76    0.31
  -2   7   2    0.28    0.48
   1  -7  -2    2.26    0.37
  -1  -7   2    2.09    0.37
  -1   7   2    1.93    0.59
   1   7  -2    2.69    0.63
  -1   7   2    3.08    0.48
   1   7  -2    2.49    0.47
   0  -7   2    5.72    0.52
   0  -7  -2    6.46    0.62
   0   7   2    6.42    0.70
   0   7  -2    7.44    0.77
   0   7  -2    6.04    0.82
   1  -7   2   25.02    1.21
  -1  -7  -2   24.04    1.23
  -1   7  -2   26.32    1.57
   1   7   2   24.97    1.10
  -1   7  -2   27.06    1.40
  -1   7  -2   26.53    1.43
   1   7   2   26.83    1.43
  -2  -7  -2   10.90    0.78
   2  -7   2   12.84    0.78
  -2   7  -2   13.38    0.91
   2   7   2   12.44    0.94
  -2   7  -2   12.36    0.97
  -2   7  -2   11.63    1.03
   2   7   2   11.63    0.69
  -3  -7  -2   25.51    1.31
   3   7   2   22.47    1.20
  -3   7  -2   24.47    1.49
  -3   7  -2   27.76    1.64
  -3   7  -2   28.45    1.40
   3   7   2   24.63    1.46
  -4  -7  -2    1.19    0.37
  -4   7  -2    1.25    0.48
  -4   7  -2    1.28    0.58
  -4   7  -2    1.40    0.43
   4   7   2    0.87    0.35
   4   7   2    1.38    0.45
   3  -8  -2    0.12    0.24
  -3  -8   2   -0.29    0.25
  -3   8   2    0.26    0.28
   3   8  -2   -0.07    0.32
  -3   8   2   -0.18    0.54
   2  -8  -2    0.71    0.30
  -2  -8   2    1.04    0.32
   2   8  -2    0.58    0.34
  -2   8   2    0.41    0.60
  -2   8   2    0.80    0.37
  -1  -8   2    0.97    0.30
   1  -8  -2    1.22    0.34
  -1   8   2    1.10    0.40
   1   8  -2    2.18    0.49
   0  -8  -2   18.40    1.07
   0  -8   2   18.87    1.05
   0   8   2   20.12    1.27
   0   8  -2   19.79    1.25
   0   8  -2   21.37    1.47
   1  -8   2   20.25    1.08
  -1  -8  -2   19.36    1.11
  -1   8  -2   20.65    1.48
  -1   8  -2   21.21    1.28
   1   8   2   20.11    1.29
   2  -8   2    9.64    0.71
  -2  -8  -2    8.28    0.74
  -2   8  -2    9.00    0.98
  -2   8  -2   10.78    1.19
   2   8   2    8.55    0.91
  -3  -8  -2   14.68    1.02
   3  -8   2   16.00    1.01
   3   8   2   17.91    1.25
  -3   8  -2   21.40    1.51
  -3   8  -2   19.17    1.16
   3   8   2   15.37    0.94
  -3   8  -2   21.38    1.40
   8   0  -3   -0.33    0.50
   7   0  -3   -0.20    0.44
  -7   0   3   -0.53    0.36
  -7   0   3    0.02    0.25
  -7   0   3    0.30    0.40
  -6   0   3   -0.12    0.21
  -6   0   3   -0.12    0.37
  -6   0   3    0.29    0.43
   6   0  -3   -0.15    0.38
   5   0  -3   -0.36    0.30
  -5   0   3   -0.46    0.42
  -5   0   3    0.28    0.35
  -5   0   3    0.20    0.22
  -4   0   3   -0.05    0.16
  -4   0   3   -0.20    0.28
   4   0  -3    0.32    0.32
  -4   0   3   -0.45    0.36
  -4   0   3    0.07    0.13
  -3   0   3    0.09    0.14
  -3   0   3   -0.09    0.22
   3   0  -3   -0.11    0.22
  -3   0   3   -0.17    0.28
  -3   0   3    0.00    0.10
  -2   0   3    0.36    0.20
   2   0  -3    0.00    0.18
  -2   0   3    0.07    0.10
  -2   0   3    0.26    0.30
  -2   0   3    0.15    0.08
  -1   0   3    0.08    0.10
   1   0  -3    0.02    0.03
   1   0  -3   -0.03    0.08
  -1   0   3    0.14    0.06
  -1   0   3    0.13    0.08
   0   0   3    0.13    0.03
   0   0  -3    0.16    0.03
   0   0   3    0.14    0.04
   0   0  -3    0.09    0.04
   0   0   3    0.21    0.03
   0   0  -3    0.18    0.05
   0   0  -3    0.20    0.03
  -1   0  -3    0.06    0.08
  -1   0  -3    0.04    0.08
   1   0   3    0.26    0.09
  -1   0  -3    0.05    0.07
  -1   0  -3    0.17    0.07
   2   0   3    0.09    0.18
  -2   0  -3    0.11    0.14
  -2   0  -3   -0.05    0.09
  -2   0  -3   -0.03    0.11
  -2   0  -3   -0.11    0.14
  -3   0  -3    0.00    0.18
  -3   0  -3    0.18    0.12
   3   0   3   -0.24    0.20
  -3   0  -3   -0.08    0.17
  -3   0  -3   -0.14    0.11
   4   0   3    0.02    0.31
  -4   0  -3    0.15    0.19
  -4   0  -3   -0.18    0.12
  -4   0  -3    0.25    0.27
  -4   0  -3   -0.39    0.23
  -5   0  -3    0.08    0.30
  -5   0  -3   -0.15    0.15
  -5   0  -3    0.30    0.30
  -5   0  -3    0.05    0.20
   5   0   3    0.24    0.39
  -6   0  -3   -0.03    0.27
  -6   0  -3    0.14    0.25
  -6   0  -3    0.34    0.29
   6   0   3    0.43    0.40
  -7   0  -3   -0.23    0.30
  -7   0  -3    0.16    0.31
  -7   0  -3    0.62    0.35
   7   0   3   -0.41    0.45
  -7  -1   3   34.31    1.75
  -7  -1   3   35.15    1.86
  -7  -1   3   38.24    1.93
   7  -1  -3   37.80    1.88
  -7   1   3   36.13    1.80
   7   1  -3   34.50    1.83
  -7   1   3   33.98    1.81
  -7   1   3   33.01    1.92
   6  -1  -3    0.22    0.38
  -6  -1   3    0.32    0.26
  -6  -1   3    0.11    0.40
  -6  -1   3    0.55    0.37
  -6   1   3    0.77    0.48
   6   1  -3   -0.25    0.37
  -6   1   3    0.29    0.36
  -6   1   3    0.24    0.24
  -5  -1   3   21.81    1.35
  -5  -1   3   22.06    1.27
   5  -1  -3   22.67    1.21
  -5  -1   3   21.48    1.11
  -5   1   3   21.17    1.34
  -5   1   3   22.31    1.01
  -5   1   3   22.15    1.14
  -5   1   3   21.75    1.22
   5   1  -3   21.08    1.25
  -4  -1   3   39.54    1.71
  -4  -1   3   36.64    1.58
  -4  -1   3   38.35    1.79
   4  -1  -3   38.65    1.66
  -4   1   3   39.06    1.47
  -4   1   3   37.28    1.67
  -4   1   3   36.14    1.77
  -4   1   3   35.85    1.61
  -4   1   3   37.87    1.52
   4   1  -3   39.44    1.70
   3  -1  -3  164.21    5.74
  -3  -1   3  158.63    5.71
  -3  -1   3  162.82    5.79
  -3  -1   3  159.22    5.84
  -3   1   3  160.30    5.67
  -3   1   3  162.26    5.62
  -3   1   3  164.93    5.76
  -3   1   3  158.10    5.74
   3   1  -3  158.86    5.77
  -3   1   3  155.83    5.87
   2  -1  -3   30.11    1.09
  -2  -1   3   30.37    1.17
   2  -1  -3   29.15    1.19
  -2  -1   3   31.90    1.25
  -2  -1   3   31.48    1.26
  -2   1   3   29.33    1.32
  -2   1   3   28.96    1.17
  -2   1   3   30.27    1.14
   2   1  -3   30.30    1.24
  -2   1   3   29.25    1.20
   2   1  -3   29.17    1.14
   1  -1  -3  293.96   10.18
   1  -1  -3  291.90   10.13
  -1  -1   3  279.51   10.18
  -1  -1   3  289.79   10.14
  -1   1   3  290.33   10.10
   1   1  -3  296.00   10.15
  -1   1   3  281.61   10.19
   1   1  -3  295.87   10.12
  -1   1   3  274.81   10.24
   1   1  -3  304.88   10.20
   1   1  -3  297.47   10.04
  -1   1   3  267.28   10.05
  -1   1   3  299.65   10.07
   0  -1   3  192.41    6.55
   0  -1  -3  191.29    6.51
   0  -1  -3  183.06    6.50
   0   1  -3  192.95    6.63
   0   1  -3  184.81    6.55
   0   1   3  191.03    6.50
   0   1  -3  190.51    6.58
   0   1  -3  181.09    6.52
   0   1  -3  189.88    6.61
   0   1   3  186.25    6.58
  -1  -1  -3  306.46   10.85
  -1  -1  -3  307.24   10.68
   1  -1   3  316.20   10.81
  -1  -1  -3  324.53   10.70
  -1   1  -3  281.32   10.68
  -1   1  -3  315.60   10.98
  -1   1  -3  312.23   10.80
  -1   1  -3  310.08   10.96
   1   1   3  327.35   10.78
  -1   1  -3  293.52   10.86
  -2  -1  -3   10.88    0.53
   2  -1   3    9.86    0.51
  -2  -1  -3   10.63    0.49
  -2  -1  -3    9.26    0.49
   2   1   3   10.61    0.57
  -2   1  -3   10.05    0.49
  -2   1  -3    9.02    0.49
  -2   1  -3    9.72    0.56
  -2   1  -3    9.71    0.51
  -2   1  -3    9.53    0.42
   3  -1   3   72.58    2.77
  -3  -1  -3   77.21    2.79
  -3  -1  -3   76.15    2.76
  -3  -1  -3   70.95    2.75
  -3   1  -3   72.25    2.60
  -3   1  -3   76.29    2.84
  -3   1  -3   68.65    2.76
  -3   1  -3   76.45    2.76
   3   1   3   73.40    2.82
  -3   1  -3   75.44    2.75
  -4  -1  -3  226.56    7.62
  -4  -1  -3  229.91    7.76
  -4  -1  -3  215.11    7.73
  -4  -1  -3  213.15    7.75
   4  -1   3  206.88    7.75
  -4   1  -3  210.04    7.48
  -4   1  -3  222.11    7.76
  -4   1  -3  222.21    7.84
  -4   1  -3  204.52    7.67
   4   1   3  213.56    7.80
  -4   1  -3  223.13    7.74
  -5  -1  -3   28.10    1.14
  -5  -1  -3   26.82    1.30
   5  -1   3   24.70    1.35
  -5  -1  -3   27.03    1.34
  -5  -1  -3   24.99    1.30
  -5   1  -3   26.10    1.39
  -5   1  -3   26.18    1.29
  -5   1  -3   25.99    1.21
  -5   1  -3   27.48    1.31
   5   1   3   25.74    1.43
  -6  -1  -3    0.37    0.33
   6  -1   3    0.23    0.44
  -6  -1  -3    0.67    0.29
  -6  -1  -3    0.43    0.31
  -6   1  -3    0.12    0.31
   6   1   3    0.02    0.38
  -6   1  -3    0.66    0.30
  -6   1  -3   -0.02    0.23
  -6   1  -3    0.56    0.37
  -7  -1  -3   44.14    1.98
  -7  -1  -3   38.75    1.95
  -7  -1  -3   41.55    1.95
  -7   1  -3   41.45    1.96
  -7   1  -3   39.95    2.02
   7   1   3   36.85    2.04
  -7   1  -3   37.15    1.89
  -7  -2   3   16.36    1.16
  -7  -2   3   17.39    1.22
  -7  -2   3   17.89    1.10
  -7   2   3   17.63    1.26
  -7   2   3   15.00    1.08
  -7   2   3   14.44    1.12
   7   2  -3   15.88    1.23
  -6  -2   3   12.02    0.98
  -6  -2   3   10.34    0.79
  -6  -2   3   12.21    1.01
  -6   2   3    9.69    0.87
   6   2  -3   11.33    0.99
  -6   2   3   10.04    0.94
  -6   2   3   10.07    0.80
  -5  -2   3   26.25    1.41
  -5  -2   3   26.42    1.28
  -5  -2   3   24.55    1.43
   5  -2  -3   26.40    1.32
  -5   2   3   24.81    1.48
  -5   2   3   27.40    1.25
  -5   2   3   26.17    1.35
  -5   2   3   26.24    1.29
   5   2  -3   26.25    1.38
   5   2  -3   26.32    1.19
  -4  -2   3   38.74    1.61
  -4  -2   3   39.65    1.74
   4  -2  -3   39.96    1.66
  -4  -2   3   37.91    1.80
  -4   2   3   40.41    1.64
  -4   2   3   37.05    1.56
  -4   2   3   38.77    1.68
  -4   2   3   36.77    1.62
  -4   2   3   36.15    1.81
   4   2  -3   37.53    1.72
   4   2  -3   38.24    1.56
   3  -2  -3   11.28    0.63
  -3  -2   3   12.72    0.72
   3  -2  -3   10.65    0.42
  -3  -2   3   10.78    0.58
  -3  -2   3   11.14    0.71
   3   2  -3   11.11    0.68
  -3   2   3   10.43    0.61
  -3   2   3   10.25    0.63
  -3   2   3   10.86    0.60
  -3   2   3    9.81    0.76
   3   2  -3   10.68    0.58
  -3   2   3   11.51    0.66
  -2  -2   3    7.19    0.44
  -2  -2   3    7.18    0.40
  -2  -2   3    7.51    0.50
   2  -2  -3    8.05    0.43
  -2   2   3    7.92    0.49
  -2   2   3    7.45    0.36
  -2   2   3    7.88    0.58
   2   2  -3    7.03    0.43
  -2   2   3    7.46    0.43
   2   2  -3    7.17    0.49
  -2   2   3    7.93    0.43
  -2   2   3    7.61    0.48
   1  -2  -3   20.24    0.80
  -1  -2   3   20.83    0.80
  -1  -2   3   19.08    0.85
  -1   2   3   20.84    0.82
  -1   2   3   19.40    0.90
   1   2  -3   19.77    0.86
   1   2  -3   20.81    0.88
   1   2  -3   20.05    0.85
  -1   2   3   20.44    0.91
  -1   2   3   21.26    0.91
  -1   2   3   20.21    0.82
   1   2  -3   22.12    0.83
   1   2  -3   21.59    0.84
  -1   2   3   21.35    0.81
   0  -2  -3    4.63    0.25
   0  -2   3    4.54    0.23
   0  -2  -3    4.66    0.27
   0  -2   3    4.28    0.22
   0   2  -3    4.38    0.23
   0   2  -3    4.04    0.36
   0   2   3    4.77    0.25
   0   2  -3    4.70    0.34
   0   2  -3    4.75    0.33
   0   2   3    4.43    0.27
  -1  -2  -3  109.75    3.83
  -1  -2  -3  110.80    3.92
   1  -2   3  108.89    3.82
   1   2   3  113.80    3.92
  -1   2  -3  115.07    4.01
  -1   2  -3  113.60    3.94
  -1   2  -3  115.39    3.83
  -1   2  -3  107.96    3.97
  -1   2  -3  105.52    3.98
  -1   2  -3  105.46    3.93
  -2  -2  -3   11.74    0.57
  -2  -2  -3   11.85    0.59
   2  -2   3   11.06    0.53
  -2  -2  -3   12.43    0.50
  -2   2  -3   11.63    0.62
  -2   2  -3   11.54    0.65
  -2   2  -3   11.30    0.60
  -2   2  -3   11.82    0.53
   2   2   3   12.09    0.63
  -2   2  -3   11.83    0.57
  -3  -2  -3    3.37    0.32
  -3  -2  -3    3.10    0.36
  -3  -2  -3    3.68    0.36
   3  -2   3    2.47    0.31
  -3   2  -3    3.17    0.33
   3   2   3    3.16    0.40
  -3   2  -3    2.53    0.35
  -3   2  -3    2.34    0.31
  -3   2  -3    3.44    0.45
   4  -2   3    8.73    0.69
  -4  -2  -3    9.88    0.64
  -4  -2  -3    8.07    0.60
  -4  -2  -3   10.39    0.72
  -4   2  -3    9.67    0.65
  -4   2  -3    8.43    0.75
  -4   2  -3    8.79    0.62
  -4   2  -3    9.39    0.66
  -4   2  -3    9.82    0.65
   4   2   3   10.03    0.81
  -5  -2  -3    2.48    0.41
  -5  -2  -3    2.80    0.48
  -5  -2  -3    1.89    0.36
   5  -2   3    1.97    0.44
  -5   2  -3    2.14    0.42
   5   2   3    2.99    0.52
  -5   2  -3    3.42    0.44
  -5   2  -3    2.40    0.51
  -5   2  -3    2.75    0.42
  -5   2  -3    2.10    0.39
  -6  -2  -3    0.04    0.23
  -6  -2  -3   -0.18    0.31
  -6   2  -3    0.36    0.35
  -6   2  -3    0.31    0.31
  -6   2  -3    0.04    0.25
   6   2   3   -0.20    0.44
  -6   2  -3   -0.02    0.25
  -6   2  -3   -0.46    0.24
  -7  -2  -3   11.99    0.92
  -7  -2  -3   11.20    1.05
  -7   2  -3   11.38    0.93
  -7   2  -3   10.60    0.97
  -7   2  -3   10.88    0.87
   7   2   3   10.50    1.11
  -7  -3   3    0.71    0.38
  -7  -3   3    0.56    0.49
   7   3  -3    0.21    0.50
  -7   3   3    0.90    0.39
  -7   3   3    0.52    0.42
  -7   3   3    1.11    0.46
  -6  -3   3    3.86    0.54
  -6  -3   3    3.71    0.63
  -6   3   3    3.40    0.65
   6   3  -3    3.20    0.61
  -6   3   3    2.88    0.50
  -6   3   3    3.34    0.56
  -5  -3   3    2.15    0.46
  -5  -3   3    3.13    0.61
  -5  -3   3    2.60    0.40
  -5   3   3    2.47    0.53
   5   3  -3    2.40    0.39
  -5   3   3    2.28    0.43
   5   3  -3    2.28    0.48
  -5   3   3    2.12    0.44
  -5   3   3    2.69    0.43
  -4  -3   3    0.49    0.34
   4  -3  -3    0.16    0.28
  -4  -3   3    0.18    0.19
  -4  -3   3   -0.06    0.38
   4   3  -3    0.33    0.22
  -4   3   3   -0.22    0.31
  -4   3   3    0.15    0.27
  -4   3   3    0.42    0.31
  -4   3   3    0.04    0.20
  -4   3   3   -0.32    0.24
   4   3  -3    0.30    0.35
  -3  -3   3   22.41    1.04
   3  -3  -3   22.30    0.99
  -3  -3   3   24.24    1.10
  -3  -3   3   20.80    0.97
  -3   3   3   20.51    1.08
   3   3  -3   21.91    1.02
  -3   3   3   22.08    1.01
  -3   3   3   21.18    1.14
  -3   3   3   22.12    1.01
  -3   3   3   21.28    0.89
  -3   3   3   18.49    1.05
   3   3  -3   21.71    1.08
   2  -3  -3    0.48    0.15
  -2  -3   3    0.47    0.14
  -2  -3   3    0.35    0.21
  -2   3   3    0.38    0.16
  -2   3   3    0.27    0.24
   2   3  -3    0.39    0.14
  -2   3   3    0.20    0.22
  -2   3   3    0.36    0.12
  -2   3   3    0.24    0.15
   2   3  -3    0.25    0.17
   2   3  -3    0.27    0.21
   2   3  -3    0.63    0.23
  -2   3   3    0.51    0.22
   1  -3  -3   10.13    0.45
  -1  -3   3    9.81    0.50
  -1  -3   3   10.87    0.49
  -1   3   3    9.83    0.53
  -1   3   3    9.74    0.55
   1   3  -3    9.76    0.61
  -1   3   3   10.78    0.63
   1   3  -3   10.58    0.54
  -1   3   3   10.88    0.66
   1   3  -3   10.80    0.52
   1   3  -3   10.22    0.55
   1   3  -3   10.01    0.57
  -1   3   3   11.11    0.46
  -1   3   3    9.66    0.44
   0  -3   3    7.11    0.36
   0  -3   3    6.52    0.29
   0  -3  -3    7.45    0.40
   0  -3  -3    7.46    0.35
   0   3  -3    6.48    0.28
   0   3   3    6.98    0.52
   0   3  -3    6.99    0.47
   0   3  -3    6.93    0.43
   0   3  -3    6.76    0.30
   0   3   3    6.65    0.44
   0   3   3    8.12    0.36
   0   3  -3    7.34    0.52
   0   3   3    7.49    0.36
  -1  -3  -3   39.85    1.51
  -1  -3  -3   39.54    1.54
  -1   3  -3   38.13    1.57
  -1   3  -3   40.47    1.63
  -1   3  -3   40.13    1.65
   1   3   3   39.43    1.61
   1   3   3   41.55    1.52
  -2  -3  -3    7.95    0.47
   2  -3   3    7.40    0.36
  -2  -3  -3    7.51    0.47
  -2   3  -3    7.95    0.57
  -2   3  -3    7.92    0.47
   2   3   3    8.21    0.51
  -2   3  -3    7.81    0.58
  -2   3  -3    7.86    0.36
  -2   3  -3    8.00    0.51
  -3  -3  -3    2.66    0.33
  -3  -3  -3    2.77    0.27
  -3  -3  -3    2.75    0.37
   3  -3   3    2.61    0.30
  -3   3  -3    2.88    0.30
  -3   3  -3    2.83    0.44
   3   3   3    2.73    0.42
  -3   3  -3    2.97    0.41
  -3   3  -3    2.53    0.42
  -3   3  -3    2.38    0.39
  -4  -3  -3    9.94    0.71
  -4  -3  -3   12.16    0.71
  -4  -3  -3   11.68    0.63
   4   3   3   10.28    0.82
  -4   3  -3   10.46    0.72
  -4   3  -3   11.64    0.67
  -4   3  -3   10.45    0.83
  -4   3  -3   11.04    0.78
  -4   3  -3    9.33    0.73
  -5  -3  -3    6.40    0.68
  -5  -3  -3    5.98    0.61
   5   3   3    6.66    0.77
  -5   3  -3    6.08    0.76
  -5   3  -3    5.47    0.54
  -5   3  -3    5.32    0.62
  -5   3  -3    5.92    0.63
  -5   3  -3    6.82    0.70
  -6  -3  -3    0.26    0.33
  -6  -3  -3    0.34    0.28
  -6   3  -3    0.61    0.33
  -6   3  -3    0.79    0.40
   6   3   3   -0.18    0.43
  -6   3  -3    0.18    0.30
  -6   3  -3    0.35    0.30
  -7  -3  -3    3.10    0.61
  -7  -3  -3    3.84    0.62
  -7   3  -3    2.47    0.52
  -7   3  -3    1.83    0.44
   7   3   3    2.28    0.67
  -7   3  -3    3.59    0.67
  -7  -4   3    0.83    0.37
  -7  -4   3    0.54    0.49
  -7   4   3    1.16    0.51
  -7   4   3    0.37    0.38
  -7   4   3    1.52    0.46
   7   4  -3    0.41    0.56
  -6  -4   3   17.78    1.06
  -6  -4   3   17.61    1.17
  -6   4   3   16.68    1.24
   6   4  -3   18.05    1.34
   6   4  -3   17.94    1.22
  -6   4   3   17.76    1.11
  -6   4   3   15.53    1.09
  -6   4   3   16.79    1.07
  -5  -4   3   28.82    1.38
  -5  -4   3   28.69    1.46
   5   4  -3   27.60    1.39
  -5   4   3   27.87    1.38
  -5   4   3   28.49    1.42
  -5   4   3   26.69    1.53
  -5   4   3   28.93    1.48
   5   4  -3   28.14    1.50
  -4  -4   3    6.59    0.71
  -4  -4   3    7.90    0.69
  -4  -4   3    6.99    0.55
   4   4  -3    8.63    0.64
  -4   4   3    7.55    0.81
  -4   4   3    6.50    0.71
  -4   4   3    5.70    0.56
  -4   4   3    6.92    0.45
  -4   4   3    6.29    0.69
   4   4  -3    7.24    0.70
  -4   4   3    7.41    0.61
  -3  -4   3    4.54    0.47
  -3  -4   3    5.06    0.44
  -3  -4   3    4.82    0.47
   3   4  -3    4.38    0.51
  -3   4   3    4.94    0.61
  -3   4   3    4.00    0.53
  -3   4   3    4.53    0.37
   3   4  -3    5.25    0.53
  -3   4   3    4.40    0.46
  -3   4   3    3.75    0.55
   3   4  -3    4.69    0.38
  -3   4   3    4.91    0.44
   2  -4  -3   90.34    3.19
  -2  -4   3   88.82    3.26
  -2  -4   3   84.70    3.25
  -2   4   3   86.53    3.38
   2   4  -3   92.55    3.28
   2   4  -3   93.13    3.29
  -2   4   3   88.46    3.46
   2   4  -3   86.66    3.38
  -2   4   3   89.55    3.45
  -2   4   3   83.06    3.16
  -2   4   3   93.03    3.33
  -2   4   3   88.12    3.19
  -2   4   3   88.11    3.29
   2   4  -3   93.77    3.39
   1  -4  -3  204.48    7.23
  -1  -4   3  201.06    7.24
  -1  -4   3  206.15    7.30
   1  -4  -3  210.91    7.35
   1   4  -3  200.49    7.45
   1   4  -3  214.74    7.39
  -1   4   3  201.78    7.38
  -1   4   3  210.27    7.36
  -1   4   3  210.54    7.52
   1   4  -3  214.54    7.26
  -1   4   3  194.37    7.22
  -1   4   3  208.36    7.23
   1   4  -3  213.19    7.44
  -1   4   3  219.19    7.50
   1   4  -3  211.19    7.27
   1   4  -3  212.79    7.39
   0  -4   3  173.28    6.10
   0  -4  -3  170.80    6.05
   0  -4  -3  169.79    6.15
   0   4   3  170.76    6.23
   0   4   3  179.24    6.06
   0   4  -3  177.33    6.26
   0   4  -3  182.36    6.26
   0   4   3  171.80    6.32
   0   4  -3  172.89    6.30
   0   4  -3  167.62    6.22
  -1  -4  -3  139.85    5.02
  -1  -4  -3  142.35    5.09
   1   4   3  149.01    5.03
  -1   4  -3  136.68    5.23
  -1   4  -3  141.83    5.15
  -1   4  -3  149.73    5.22
   1   4   3  134.18    5.16
  -2  -4  -3  115.12    4.04
   2   4   3  115.00    4.02
  -2   4  -3  105.40    4.14
   2   4   3  104.90    4.12
  -2   4  -3  110.72    4.08
  -2   4  -3  113.18    4.07
  -2   4  -3  106.03    4.19
  -3  -4  -3   58.71    2.30
  -3  -4  -3   58.43    2.30
  -3   4  -3   61.32    2.31
  -3   4  -3   60.25    2.14
   3   4   3   59.10    2.34
  -3   4  -3   57.32    2.36
  -3   4  -3   58.02    2.44
  -3   4  -3   54.68    2.44
  -4  -4  -3   22.41    1.10
  -4  -4  -3   21.16    1.08
  -4   4  -3   21.48    1.14
   4   4   3   21.83    1.18
  -4   4  -3   20.42    1.20
  -4   4  -3   19.07    1.14
  -4   4  -3   21.46    0.96
  -5  -4  -3    3.40    0.51
  -5  -4  -3    3.49    0.50
  -5   4  -3    4.48    0.60
   5   4   3    3.70    0.61
  -5   4  -3    3.49    0.60
  -5   4  -3    4.04    0.43
  -5   4  -3    2.98    0.51
  -5   4  -3    3.94    0.60
  -6  -4  -3   12.73    0.94
  -6  -4  -3   13.33    0.92
  -6   4  -3   13.37    0.98
  -6   4  -3   13.08    0.82
   6   4   3   12.35    1.07
  -6   4  -3   10.17    0.89
  -7  -4  -3    5.33    0.71
  -7  -4  -3    5.00    0.71
  -7   4  -3    5.09    0.58
  -7   4  -3    5.49    0.75
   7   4   3    3.03    0.74
  -6  -5   3    0.35    0.30
  -6   5   3    1.19    0.47
  -6   5   3    0.48    0.32
   6   5  -3    0.30    0.45
  -6   5   3    0.31    0.34
  -6   5   3    0.71    0.39
   6   5  -3    0.37    0.33
  -5  -5   3    0.69    0.30
   5   5  -3    0.49    0.33
  -5   5   3    0.66    0.37
  -5   5   3    0.45    0.58
  -5   5   3    0.78    0.32
   5   5  -3    0.35    0.41
  -5   5   3    0.90    0.32
  -5   5   3    1.69    0.45
  -4  -5   3    5.81    0.57
  -4   5   3    4.88    0.65
  -4   5   3    5.94    0.73
   4   5  -3    6.37    0.64
  -4   5   3    5.34    0.60
   4   5  -3    5.47    0.63
  -4   5   3    5.57    0.51
  -4   5   3    5.39    0.67
  -3  -5   3   14.91    0.82
  -3   5   3   13.97    0.98
  -3   5   3   15.65    0.81
  -3   5   3   14.63    1.05
  -3   5   3   15.17    0.88
   3   5  -3   15.99    0.90
  -3   5   3   15.68    0.96
   3   5  -3   14.68    0.91
  -3   5   3   14.51    0.76
  -2  -5   3   24.51    1.13
  -2   5   3   25.50    1.42
  -2   5   3   23.86    1.22
  -2   5   3   25.65    1.04
   2   5  -3   28.15    1.21
   2   5  -3   27.02    1.29
   2   5  -3   26.63    1.14
  -2   5   3   24.95    1.18
  -2   5   3   25.26    1.34
   2   5  -3   26.77    1.35
  -1  -5   3    1.87    0.28
   1  -5  -3    2.12    0.31
   1   5  -3    2.54    0.37
  -1   5   3    3.40    0.60
   1   5  -3    1.98    0.35
  -1   5   3    2.37    0.21
   1   5  -3    2.48    0.25
   1   5  -3    3.14    0.46
   1   5  -3    2.71    0.50
  -1   5   3    2.32    0.35
   0  -5   3   20.63    0.92
   0  -5  -3   20.75    0.97
   0   5  -3   20.80    1.06
   0   5   3   20.30    1.06
   0   5  -3   20.91    1.07
   0   5  -3   19.34    1.16
   0   5   3   20.46    1.19
   0   5   3   20.62    0.84
   1  -5   3   11.70    0.63
  -1  -5  -3   11.94    0.68
   1   5   3   11.60    0.76
   1   5   3   11.35    0.60
  -1   5  -3   12.40    0.92
  -1   5  -3   11.14    0.73
  -1   5  -3   11.02    0.79
  -2  -5  -3    1.89    0.31
   2   5   3    1.81    0.36
   2   5   3    2.31    0.31
  -2   5  -3    2.25    0.39
  -2   5  -3    2.70    0.47
  -2   5  -3    2.33    0.37
  -2   5  -3    2.37    0.53
  -3  -5  -3   74.32    2.85
  -3   5  -3   69.69    2.91
  -3   5  -3   75.91    2.87
  -3   5  -3   73.48    3.06
   3   5   3   77.88    3.00
  -3   5  -3   68.48    2.99
   3   5   3   71.91    2.84
  -4  -5  -3   25.13    1.27
  -4   5  -3   24.42    1.42
   4   5   3   25.51    1.32
  -4   5  -3   26.62    1.12
   4   5   3   27.36    1.40
  -4   5  -3   26.39    1.43
  -4   5  -3   22.73    1.30
  -5  -5  -3    0.20    0.24
   5   5   3    0.22    0.33
  -5   5  -3    0.26    0.36
  -5   5  -3    0.57    0.40
  -5   5  -3    0.26    0.19
   5   5   3   -0.32    0.32
  -5   5  -3    0.07    0.27
  -6  -5  -3    4.63    0.62
  -6   5  -3    3.72    0.65
   6   5   3    5.56    0.73
  -6   5  -3    4.08    0.62
   6   5   3    2.64    0.60
  -5  -6   3    0.20    0.27
  -5   6   3    0.79    0.39
   5   6  -3    0.41    0.33
  -5   6   3    0.33    0.32
   5   6  -3   -0.16    0.35
  -5   6   3    0.33    0.39
  -4  -6   3    2.36    0.40
  -4   6   3    1.88    0.43
   4   6  -3    1.89    0.45
  -4   6   3    1.66    0.56
   4   6  -3    2.58    0.50
  -4   6   3    2.35    0.49
  -4   6   3    2.26    0.53
  -3  -6   3   20.27    1.03
  -3   6   3   18.88    1.30
   3   6  -3   18.89    1.02
  -3   6   3   19.32    1.04
   3   6  -3   23.58    1.22
  -3   6   3   18.76    1.23
   2  -6  -3   26.36    1.27
  -2  -6   3   26.85    1.24
  -2   6   3   27.80    1.33
   2   6  -3   27.73    1.18
  -2   6   3   26.73    1.56
   2   6  -3   28.18    1.42
   2   6  -3   27.18    1.47
  -1  -6   3    0.46    0.20
   1  -6  -3    0.33    0.21
  -1   6   3    0.87    0.48
  -1   6   3    0.36    0.25
   1   6  -3    0.08    0.37
   1   6  -3    0.30    0.26
  -1   6   3    0.41    0.12
   1   6  -3   -0.08    0.12
   0  -6   3    0.55    0.19
   0  -6  -3    0.53    0.22
   0   6   3    0.52    0.14
   0   6  -3    0.97    0.32
   0   6  -3    0.49    0.38
   0   6   3    0.15    0.23
   0   6  -3    0.26    0.27
   1  -6   3   50.69    2.00
  -1  -6  -3   50.42    2.06
   1   6   3   51.20    2.21
  -1   6  -3   51.12    2.17
  -1   6  -3   48.48    2.19
  -1   6  -3   51.95    2.32
   1   6   3   48.23    1.92
   2  -6   3   11.08    0.65
  -2  -6  -3   10.77    0.70
   2   6   3   10.19    0.63
  -2   6  -3    9.51    0.93
  -2   6  -3   11.10    0.76
   2   6   3    8.93    0.76
  -2   6  -3    8.58    0.79
  -3  -6  -3   15.38    0.90
  -3   6  -3   16.36    0.94
   3   6   3   15.55    0.87
   3   6   3   14.10    1.00
  -3   6  -3   14.45    1.12
  -3   6  -3   15.30    1.07
  -3   6  -3   13.21    0.94
  -4  -6  -3   25.84    1.31
   4   6   3   28.12    1.47
  -4   6  -3   24.37    1.38
  -4   6  -3   26.31    1.52
   4   6   3   24.04    1.31
  -4   6  -3   24.55    1.51
  -4   6  -3   25.07    1.29
  -5  -6  -3    0.00    0.27
  -5   6  -3    1.29    0.50
  -5   6  -3    0.31    0.40
   5   6   3   -0.53    0.28
  -5   6  -3    0.13    0.30
   5   6   3   -0.37    0.27
  -4  -7   3    6.15    0.67
  -4   7   3    7.82    1.01
   4   7  -3    8.18    0.86
   4   7  -3    7.05    0.69
   3  -7  -3    1.37    0.35
  -3  -7   3    1.35    0.34
  -3   7   3    1.23    0.35
   3   7  -3    1.45    0.43
   3   7  -3    0.73    0.28
  -3   7   3    1.54    0.58
   2  -7  -3    0.32    0.25
  -2  -7   3   -0.07    0.19
  -2   7   3   -0.15    0.22
   2   7  -3   -0.11    0.24
  -2   7   3    0.20    0.49
   2   7  -3   -0.25    0.16
   1  -7  -3    0.25    0.22
  -1  -7   3    0.04    0.18
   1   7  -3   -0.26    0.20
   1   7  -3    0.56    0.43
  -1   7   3    0.41    0.47
  -1   7   3    0.20    0.25
   0  -7  -3    1.03    0.29
   0  -7   3    0.94    0.25
   0   7  -3    1.33    0.41
   0   7   3    1.04    0.37
   0   7  -3    0.44    0.42
   0   7  -3    0.57    0.30
   1  -7   3    0.27    0.20
  -1  -7  -3    0.51    0.25
   1   7   3   -0.22    0.26
   1   7   3    0.36    0.15
  -1   7  -3   -0.05    0.36
  -1   7  -3    0.46    0.37
  -1   7  -3    0.42    0.28
   2  -7   3    1.93    0.35
  -2  -7  -3    2.66    0.44
  -2   7  -3    1.76    0.40
   2   7   3    1.82    0.43
   2   7   3    2.07    0.31
  -2   7  -3    1.98    0.61
  -2   7  -3    1.94    0.53
  -3  -7  -3   43.88    1.96
  -3   7  -3   44.39    2.19
  -3   7  -3   43.18    2.00
   3   7   3   42.04    1.86
  -3   7  -3   43.64    2.23
   3   7   3   47.20    2.17
  -4  -7  -3   35.90    1.78
  -4   7  -3   40.49    2.11
   4   7   3   35.67    1.74
  -4   7  -3   39.52    2.05
   4   7   3   38.63    1.98
  -4   7  -3   37.93    1.92
  -4   7  -3   39.89    1.83
   3  -8  -3    2.22    0.46
  -3  -8   3    2.39    0.45
  -3   8   3    2.90    0.52
   3   8  -3    2.96    0.58
  -3   8   3    2.82    0.78
  -2  -8   3    0.50    0.27
   2  -8  -3    0.78    0.32
   2   8  -3    0.94    0.39
  -2   8   3    0.45    0.31
  -2   8   3    0.03    0.56
   1  -8  -3   20.33    1.17
  -1  -8   3   21.78    1.14
   1   8  -3   23.75    1.39
  -1   8   3   25.28    1.37
   1   8  -3   22.98    1.55
   0  -8   3   34.10    1.59
   0  -8  -3   33.45    1.64
   0   8  -3   38.72    2.04
   0   8  -3   35.94    1.84
   0   8   3   36.47    1.84
  -1  -8  -3    1.35    0.37
   1  -8   3    1.36    0.31
   1   8   3    0.82    0.40
  -1   8  -3    1.58    0.45
  -1   8  -3    1.37    0.42
  -1   8  -3    0.69    0.54
   2  -8   3   41.11    1.88
  -2  -8  -3   41.37    1.94
  -2   8  -3   44.57    2.34
  -2   8  -3   45.70    2.11
  -2   8  -3   45.74    2.23
   2   8   3   43.02    2.15
  -3  -8  -3   23.97    1.39
   3  -8   3   25.29    1.35
   3   8   3   26.12    1.29
  -3   8  -3   29.66    1.54
   3   8   3   31.64    1.68
  -3   8  -3   25.20    1.64
  -3   8  -3   31.07    1.85
  -7   0   4   32.50    1.67
   7   0  -4   33.95    1.79
  -7   0   4   30.99    1.76
  -7   0   4   34.82    1.89
  -6   0   4   76.75    3.28
  -6   0   4   76.46    3.18
  -6   0   4   77.88    3.39
   6   0  -4   85.76    3.30
  -5   0   4   38.73    1.95
   5   0  -4   39.42    1.77
  -5   0   4   37.57    1.70
  -5   0   4   39.06    1.82
  -4   0   4   42.96    1.56
  -4   0   4   43.26    2.00
  -4   0   4   44.41    1.90
   4   0  -4   45.80    1.88
  -4   0   4   43.84    1.80
  -4   0   4   42.93    1.61
  -3   0   4   14.80    0.79
  -3   0   4   15.26    0.74
  -3   0   4   15.38    0.95
   3   0  -4   16.23    0.79
  -3   0   4   14.50    0.60
  -2   0   4   30.11    1.23
   2   0  -4   29.39    1.07
   2   0  -4   31.52    1.23
  -2   0   4   30.46    1.33
  -2   0   4   30.41    1.18
  -1   0   4  193.03    6.74
  -1   0   4  194.39    6.71
   1   0  -4  188.34    6.71
   1   0  -4  196.56    6.80
   0   0   4    0.83    0.06
   0   0   4    0.71    0.06
   0   0   4    0.83    0.09
   0   0  -4    0.85    0.06
   0   0  -4    0.66    0.10
   0   0  -4    0.82    0.07
   0   0  -4    0.76    0.10
   1   0   4    8.53    0.40
  -1   0  -4    8.56    0.39
  -1   0  -4    9.29    0.41
  -1   0  -4    6.81    0.36
  -1   0  -4    9.38    0.40
  -2   0  -4   50.05    1.84
  -2   0  -4   46.38    1.81
  -2   0  -4   50.84    1.82
  -2   0  -4   46.91    1.82
   2   0   4   49.99    1.84
  -2   0  -4   48.15    1.79
  -3   0  -4   91.19    3.36
   3   0   4   90.63    3.40
  -3   0  -4   89.62    3.38
  -3   0  -4   94.50    3.32
  -3   0  -4   91.07    3.36
  -4   0  -4   50.32    1.90
  -4   0  -4   50.51    2.09
  -4   0  -4   52.58    1.97
   4   0   4   51.69    2.13
  -4   0  -4   46.97    2.02
  -4   0  -4   51.02    2.06
  -5   0  -4   74.24    2.97
  -5   0  -4   74.03    2.96
   5   0   4   76.05    3.06
  -5   0  -4   77.24    2.85
  -5   0  -4   73.23    3.00
   6   0   4   11.31    0.98
  -6   0  -4   10.29    0.84
  -6   0  -4   10.99    0.86
  -6   0  -4   13.05    0.86
  -7   0  -4   29.28    1.55
   7   0   4   25.22    1.61
  -7   0  -4   29.85    1.54
  -7   0  -4   26.36    1.49
  -7  -1   4    3.84    0.70
   7  -1  -4    4.75    0.70
  -7  -1   4    4.41    0.76
  -7  -1   4    3.81    0.57
  -7   1   4    3.50    0.64
  -7   1   4    3.74    0.70
   7   1  -4    3.51    0.69
  -6  -1   4    6.86    0.69
  -6  -1   4    6.33    0.73
   6  -1  -4    6.35    0.73
  -6  -1   4    6.87    0.84
  -6   1   4    6.34    0.69
   6   1  -4    7.59    0.80
  -6   1   4    7.41    0.92
  -6   1   4    6.74    0.76
  -5  -1   4   13.73    1.00
   5  -1  -4   14.37    0.95
  -5  -1   4   13.83    1.11
  -5  -1   4   13.13    0.83
  -5   1   4   14.05    0.74
  -5   1   4   15.29    0.89
   5   1  -4   15.40    1.01
  -5   1   4   15.33    1.00
  -5   1   4   13.96    1.13
  -4  -1   4    2.48    0.35
   4  -1  -4    2.24    0.40
  -4  -1   4    2.90    0.59
  -4  -1   4    2.39    0.45
  -4   1   4    2.34    0.38
   4   1  -4    2.53    0.27
  -4   1   4    2.32    0.26
  -4   1   4    2.17    0.44
  -4   1   4    3.18    0.62
  -4   1   4    2.02    0.28
   4   1  -4    2.63    0.45
  -3  -1   4   20.34    1.02
   3  -1  -4   21.42    0.98
  -3  -1   4   21.69    1.10
  -3  -1   4   20.69    0.91
  -3   1   4   20.18    0.88
  -3   1   4   21.55    1.13
   3   1  -4   20.26    0.99
  -3   1   4   20.85    0.83
  -3   1   4   19.57    0.97
   3   1  -4   19.19    0.83
   2  -1  -4   12.16    0.49
  -2  -1   4   11.75    0.63
   2  -1  -4   11.01    0.57
  -2  -1   4   12.22    0.63
  -2  -1   4   11.55    0.54
  -2   1   4   11.17    0.51
  -2   1   4   12.95    0.60
   2   1  -4   11.70    0.62
  -2   1   4   10.72    0.71
  -2   1   4   11.23    0.54
   2   1  -4   11.44    0.51
   1  -1  -4   93.30    3.27
   1  -1  -4   89.51    3.26
  -1  -1   4   94.30    3.23
  -1  -1   4   86.74    3.27
  -1   1   4   91.51    3.23
   1   1  -4   97.54    3.25
   1   1  -4   92.95    3.26
  -1   1   4   93.50    3.27
   1   1  -4   95.66    3.29
  -1   1   4   90.31    3.35
   1   1  -4   91.91    3.22
   0  -1  -4  285.68   10.11
   0  -1   4  306.99   10.15
   0  -1  -4  293.35   10.26
   0   1  -4  285.51   10.22
   0   1  -4  275.47   10.19
   0   1   4  285.79   10.28
   0   1  -4  284.12   10.03
   0   1  -4  296.58   10.05
   0   1  -4  284.53   10.20
   0   1   4  305.30   10.17
  -1  -1  -4   39.61    1.44
  -1  -1  -4   39.61    1.46
   1  -1   4   39.68    1.41
  -1  -1  -4   39.81    1.38
   1   1   4   40.31    1.46
  -1   1  -4   39.40    1.45
  -1   1  -4   38.15    1.48
  -1   1  -4   41.00    1.50
  -1   1  -4   35.36    1.44
  -1   1  -4   39.53    1.42
  -1   1  -4   37.14    1.42
  -2  -1  -4    0.59    0.14
   2  -1   4    0.59    0.16
  -2  -1  -4    0.26    0.13
  -2  -1  -4    0.48    0.14
  -2   1  -4    0.56    0.10
  -2   1  -4    0.74    0.16
  -2   1  -4    0.59    0.16
   2   1   4    0.59    0.18
  -2   1  -4    0.74    0.18
  -2   1  -4    0.69    0.15
  -3  -1  -4   14.46    0.71
  -3  -1  -4   14.53    0.74
   3  -1   4   14.61    0.76
  -3  -1  -4   15.52    0.73
  -3   1  -4   14.78    0.72
  -3   1  -4   14.62    0.60
   3   1   4   15.04    0.80
  -3   1  -4   13.25    0.70
  -3   1  -4   15.04    0.73
  -3   1  -4   14.32    0.78
   4  -1   4    8.23    0.67
  -4  -1  -4    8.11    0.57
  -4  -1  -4    8.28    0.64
  -4  -1  -4    8.52    0.60
  -4  -1  -4    8.43    0.49
   4   1   4    7.50    0.69
  -4   1  -4    7.56    0.37
  -4   1  -4    8.43    0.55
  -4   1  -4    8.59    0.59
  -4   1  -4    8.85    0.61
  -4   1  -4    7.72    0.67
  -5  -1  -4    1.45    0.36
   5  -1   4    1.38    0.42
  -5  -1  -4    1.34    0.32
  -5  -1  -4    1.22    0.23
  -5  -1  -4    0.83    0.35
   5   1   4    1.03    0.47
  -5   1  -4    1.09    0.33
  -5   1  -4    1.30    0.29
  -5   1  -4    0.56    0.33
  -5   1  -4    1.05    0.30
  -6  -1  -4    0.32    0.29
   6  -1   4    0.23    0.41
  -6  -1  -4   -0.14    0.29
  -6  -1  -4   -0.29    0.24
  -6   1  -4    0.18    0.33
  -6   1  -4    0.44    0.30
  -6   1  -4    0.36    0.25
  -6   1  -4   -0.23    0.20
   6   1   4    0.12    0.47
  -7  -1  -4    2.05    0.51
  -7  -1  -4    2.79    0.51
  -7  -1  -4    2.83    0.53
  -7   1  -4    3.32    0.55
   7   1   4    1.62    0.62
  -7   1  -4    2.01    0.51
  -7   1  -4    2.25    0.50
  -7  -2   4    8.82    0.80
  -7  -2   4   10.37    0.98
  -7  -2   4   11.40    1.09
  -7   2   4   11.14    1.08
  -7   2   4    9.53    0.85
   7   2  -4   11.72    1.10
  -7   2   4    8.35    0.90
  -6  -2   4   20.96    1.31
  -6  -2   4   20.77    1.15
  -6  -2   4   20.54    1.35
   6   2  -4   19.03    1.29
  -6   2   4   21.07    1.39
  -6   2   4   20.07    1.25
  -6   2   4   21.81    1.18
   5  -2  -4   61.23    2.42
  -5  -2   4   57.95    2.57
  -5  -2   4   57.97    2.37
  -5  -2   4   61.73    2.53
  -5   2   4   56.36    2.31
  -5   2   4   57.46    2.46
   5   2  -4   60.49    2.50
   5   2  -4   56.39    2.26
  -5   2   4   57.46    2.38
  -5   2   4   55.37    2.58
  -4  -2   4   41.62    1.76
   4  -2  -4   39.86    1.67
  -4  -2   4   36.51    1.60
  -4  -2   4   38.68    1.81
  -4   2   4   38.68    1.57
   4   2  -4   38.13    1.55
  -4   2   4   39.10    1.63
  -4   2   4   37.50    1.70
  -4   2   4   36.40    1.82
   4   2  -4   39.24    1.74
  -4   2   4   37.86    1.63
   3  -2  -4   -0.25    0.17
  -3  -2   4    0.07    0.24
  -3  -2   4    0.03    0.14
  -3  -2   4   -0.02    0.25
   3  -2  -4    0.11    0.06
   3   2  -4   -0.05    0.12
  -3   2   4   -0.07    0.13
  -3   2   4   -0.11    0.17
   3   2  -4    0.06    0.22
  -3   2   4   -0.16    0.20
  -3   2   4    0.09    0.33
  -3   2   4    0.22    0.20
  -2  -2   4    2.67    0.28
  -2  -2   4    2.19    0.30
  -2  -2   4    2.49    0.23
   2  -2  -4    2.66    0.21
   2  -2  -4    2.28    0.24
   2   2  -4    2.44    0.30
  -2   2   4    2.72    0.31
  -2   2   4    2.75    0.32
  -2   2   4    1.56    0.35
   2   2  -4    2.48    0.26
  -2   2   4    2.62    0.26
  -2   2   4    2.18    0.25
   2   2  -4    2.68    0.26
  -2   2   4    2.52    0.19
  -1  -2   4    6.82    0.40
  -1  -2   4    6.80    0.32
   1  -2  -4    7.08    0.35
  -1   2   4    6.79    0.36
   1   2  -4    6.19    0.38
  -1   2   4    6.64    0.35
   1   2  -4    7.30    0.36
  -1   2   4    6.77    0.45
   1   2  -4    5.89    0.37
  -1   2   4    6.55    0.48
  -1   2   4    7.11    0.35
   1   2  -4    5.54    0.38
   1   2  -4    6.83    0.41
   0  -2   4  180.86    6.52
   0  -2   4  187.62    6.46
   0  -2  -4  185.72    6.52
   0  -2  -4  200.98    6.51
   0   2  -4  191.57    6.46
   0   2  -4  181.10    6.57
   0   2  -4  180.03    6.58
   0   2  -4  191.12    6.56
   0   2   4  201.07    6.51
   0   2  -4  180.26    6.56
   0   2   4  178.68    6.50
  -1  -2  -4  167.11    5.69
   1  -2   4  162.26    5.59
  -1  -2  -4  161.34    5.69
  -1   2  -4  158.03    5.76
  -1   2  -4  160.29    5.70
   1   2   4  167.57    5.69
  -1   2  -4  151.66    5.71
  -1   2  -4  162.72    5.75
  -1   2  -4  168.41    5.60
   2  -2   4   16.36    0.69
  -2  -2  -4   16.19    0.76
  -2  -2  -4   16.67    0.75
  -2   2  -4   17.47    0.78
  -2   2  -4   15.55    0.68
   2   2   4   17.51    0.79
  -2   2  -4   16.22    0.79
  -3  -2  -4   11.28    0.61
  -3  -2  -4   10.40    0.62
  -3  -2  -4   11.24    0.54
   3  -2   4    9.97    0.59
  -3   2  -4    9.96    0.63
  -3   2  -4    9.71    0.63
  -3   2  -4   10.67    0.69
  -3   2  -4   10.79    0.62
  -3   2  -4   11.59    0.59
   3   2   4   11.25    0.68
  -4  -2  -4    0.17    0.26
  -4  -2  -4    0.15    0.20
   4  -2   4    0.41    0.30
  -4  -2  -4    0.51    0.24
  -4   2  -4    0.13    0.20
   4   2   4    0.59    0.39
  -4   2  -4   -0.08    0.26
  -4   2  -4    0.06    0.19
  -4   2  -4    0.40    0.24
  -4   2  -4    0.49    0.23
   5  -2   4   48.87    2.13
  -5  -2  -4   49.67    2.12
  -5  -2  -4   50.47    2.10
  -5  -2  -4   49.05    2.03
  -5  -2  -4   50.87    1.93
  -5   2  -4   48.34    2.12
  -5   2  -4   52.97    2.09
  -5   2  -4   49.78    2.06
  -5   2  -4   48.41    2.21
  -5   2  -4   45.14    2.09
   5   2   4   48.37    2.20
  -6  -2  -4    6.29    0.72
  -6  -2  -4    4.81    0.60
  -6   2  -4    4.59    0.66
  -6   2  -4    5.59    0.68
  -6   2  -4    4.62    0.63
  -6   2  -4    4.36    0.56
  -6   2  -4    5.50    0.59
   6   2   4    5.65    0.79
  -7  -2  -4    3.96    0.63
  -7  -2  -4    4.47    0.68
  -7   2  -4    3.70    0.56
   7   2   4    3.41    0.73
  -7   2  -4    3.52    0.64
  -7   2  -4    3.02    0.57
  -7   2  -4    2.90    0.53
  -7  -3   4   14.84    1.20
  -7  -3   4   16.56    1.07
  -7   3   4   14.83    1.12
  -7   3   4   14.85    1.07
   7   3  -4   15.88    1.25
  -7   3   4   16.15    1.28
  -6  -3   4    5.17    0.60
  -6  -3   4    6.37    0.80
  -6  -3   4    6.01    0.76
  -6   3   4    6.03    0.86
  -6   3   4    4.70    0.65
   6   3  -4    7.03    0.82
  -6   3   4    5.82    0.67
  -5  -3   4   29.85    1.48
  -5  -3   4   26.97    1.31
  -5  -3   4   28.83    1.53
  -5   3   4   25.32    1.35
  -5   3   4   29.42    1.56
  -5   3   4   26.86    1.39
   5   3  -4   26.28    1.45
   5   3  -4   27.26    1.29
  -5   3   4   27.58    1.35
   4  -3  -4   26.52    1.21
  -4  -3   4   26.25    1.36
  -4  -3   4   25.17    1.18
  -4  -3   4   25.58    1.31
  -4   3   4   24.56    1.40
  -4   3   4   23.26    1.20
  -4   3   4   25.75    1.25
  -4   3   4   24.59    1.25
  -4   3   4   25.72    1.21
   4   3  -4   26.18    1.19
   4   3  -4   24.13    1.29
  -3  -3   4    1.78    0.27
  -3  -3   4    2.76    0.39
  -3  -3   4    2.76    0.42
   3  -3  -4    2.18    0.31
   3  -3  -4    2.39    0.22
  -3   3   4    2.71    0.42
  -3   3   4    1.84    0.29
  -3   3   4    2.54    0.24
   3   3  -4    2.22    0.31
   3   3  -4    2.12    0.40
  -3   3   4    1.87    0.37
  -3   3   4    1.83    0.32
  -3   3   4    2.02    0.45
  -2  -3   4    5.39    0.34
  -2  -3   4    5.24    0.45
   2  -3  -4    5.19    0.35
  -2   3   4    4.50    0.34
   2   3  -4    5.26    0.41
  -2   3   4    5.23    0.37
  -2   3   4    4.15    0.44
  -2   3   4    5.33    0.34
  -2   3   4    5.07    0.49
   2   3  -4    5.05    0.45
   2   3  -4    5.25    0.36
  -2   3   4    5.12    0.49
   2   3  -4    5.35    0.45
  -1  -3   4   46.00    1.83
  -1  -3   4   49.13    1.81
   1  -3  -4   50.27    1.81
   1   3  -4   51.59    1.90
   1   3  -4   48.45    1.92
  -1   3   4   52.65    2.00
   1   3  -4   47.25    1.93
  -1   3   4   50.09    1.81
   1   3  -4   50.76    1.88
  -1   3   4   48.93    1.88
   1   3  -4   48.62    1.84
  -1   3   4   48.58    1.91
   0  -3  -4  113.85    4.04
   0  -3   4  106.40    3.92
   0  -3  -4  118.93    3.99
   0  -3   4  113.15    3.98
   0   3   4  116.69    3.99
   0   3   4  113.48    4.09
   0   3  -4  121.10    4.12
   0   3   4  106.60    3.97
   0   3  -4  107.95    3.91
   0   3  -4  113.80    4.09
   0   3  -4  113.55    4.09
   0   3  -4  110.52    3.92
   0   3  -4  115.02    4.14
  -1  -3  -4   35.56    1.34
  -1  -3  -4   33.98    1.36
  -1   3  -4   34.89    1.44
  -1   3  -4   34.59    1.48
  -1   3  -4   35.16    1.41
  -1   3  -4   32.11    1.45
   1   3   4   35.54    1.35
  -1   3  -4   33.80    1.38
  -2  -3  -4   13.53    0.65
  -2  -3  -4   12.84    0.64
   2  -3   4   11.95    0.51
   2   3   4   13.17    0.68
  -2   3  -4   12.33    0.73
  -2   3  -4   12.15    0.67
  -2   3  -4   12.78    0.52
  -2   3  -4   12.17    0.64
  -2   3  -4   10.85    0.72
  -3  -3  -4   89.75    3.09
  -3  -3  -4   86.16    3.26
  -3  -3  -4   88.12    3.27
   3  -3   4   86.57    3.16
   3   3   4   90.10    3.32
  -3   3  -4   88.58    3.32
  -3   3  -4   82.22    3.34
  -3   3  -4   84.57    3.34
  -3   3  -4   90.41    3.16
  -4  -3  -4  200.85    7.20
  -4  -3  -4  202.86    7.19
   4   3   4  202.98    7.26
  -4   3  -4  205.92    7.09
  -4   3  -4  207.11    7.35
  -4   3  -4  191.46    7.23
  -4   3  -4  189.66    7.22
  -4   3  -4  197.17    7.23
  -5  -3  -4   35.62    1.65
  -5  -3  -4   36.22    1.64
  -5   3  -4   33.41    1.74
  -5   3  -4   34.82    1.65
  -5   3  -4   35.93    1.69
  -5   3  -4   35.24    1.55
  -5   3  -4   36.11    1.67
   5   3   4   37.14    1.76
  -6  -3  -4    0.98    0.34
  -6  -3  -4    0.33    0.32
  -6   3  -4    0.79    0.37
  -6   3  -4    0.48    0.29
  -6   3  -4    0.31    0.31
   6   3   4   -0.33    0.40
  -6   3  -4    1.44    0.46
  -7  -3  -4    1.35    0.44
  -7  -3  -4    1.25    0.42
  -7   3  -4    1.30    0.46
  -7   3  -4    0.77    0.34
   7   3   4    0.32    0.48
  -7  -4   4    8.14    0.97
  -7  -4   4    9.07    0.88
  -7   4   4    7.70    0.83
  -7   4   4   11.27    1.10
   7   4  -4   10.65    1.09
  -7   4   4    8.43    0.89
  -6  -4   4    6.17    0.75
  -6  -4   4    6.05    0.65
  -6   4   4    4.36    0.62
  -6   4   4    8.04    0.96
  -6   4   4    6.54    0.72
  -6   4   4    5.42    0.66
   6   4  -4    5.48    0.75
  -5  -4   4   -0.10    0.21
  -5  -4   4   -0.19    0.29
  -5   4   4   -0.15    0.27
  -5   4   4   -0.08    0.26
   5   4  -4    0.27    0.25
   5   4  -4   -0.04    0.35
  -5   4   4    0.68    0.42
  -5   4   4    0.14    0.26
  -4  -4   4    9.11    0.79
  -4  -4   4   10.16    0.75
  -4  -4   4    7.80    0.60
   4   4  -4    9.52    0.67
  -4   4   4    9.80    0.69
   4   4  -4    9.91    0.79
  -4   4   4    8.08    0.80
  -4   4   4    8.38    0.67
  -4   4   4    8.85    0.76
  -4   4   4    7.86    0.75
  -3  -4   4    1.15    0.33
  -3  -4   4    1.43    0.32
  -3  -4   4    1.72    0.29
   3   4  -4    1.22    0.36
  -3   4   4    0.92    0.40
  -3   4   4    0.89    0.34
  -3   4   4    1.60    0.29
  -3   4   4    1.61    0.25
  -3   4   4    0.94    0.27
   3   4  -4    1.75    0.27
  -3   4   4    1.48    0.40
   3   4  -4    1.53    0.31
   2  -4  -4   19.09    0.84
  -2  -4   4   19.64    0.92
  -2  -4   4   20.39    0.89
   2   4  -4   21.28    0.94
  -2   4   4   18.87    1.10
  -2   4   4   20.41    0.92
   2   4  -4   18.16    1.01
  -2   4   4   18.53    1.07
  -2   4   4   19.67    1.03
  -2   4   4   19.48    0.93
   2   4  -4   20.80    0.96
   2   4  -4   19.83    1.00
  -2   4   4   18.88    0.84
  -1  -4   4    1.30    0.20
  -1  -4   4    1.78    0.22
   1  -4  -4    1.49    0.17
   1  -4  -4    1.47    0.24
   1   4  -4    1.66    0.20
   1   4  -4    1.79    0.32
   1   4  -4    1.54    0.29
  -1   4   4    1.73    0.19
  -1   4   4    1.90    0.39
   1   4  -4    1.35    0.26
   1   4  -4    1.69    0.23
  -1   4   4    1.46    0.27
  -1   4   4    1.77    0.28
   1   4  -4    1.48    0.35
  -1   4   4    1.43    0.18
   0  -4  -4    4.36    0.28
   0  -4  -4    4.75    0.36
   0  -4   4    3.75    0.29
   0   4   4    3.73    0.40
   0   4  -4    3.29    0.39
   0   4  -4    4.41    0.44
   0   4  -4    3.75    0.47
   0   4  -4    4.70    0.50
   0   4   4    4.91    0.30
  -1  -4  -4    8.03    0.49
  -1  -4  -4    7.79    0.44
  -1   4  -4    6.58    0.63
  -1   4  -4    7.58    0.58
   1   4   4    8.29    0.46
  -1   4  -4    7.51    0.53
   1   4   4    8.57    0.60
  -2  -4  -4   45.21    1.77
  -2  -4  -4   45.59    1.80
  -2   4  -4   42.34    1.95
  -2   4  -4   46.14    1.93
   2   4   4   43.97    1.90
  -2   4  -4   44.13    1.84
  -2   4  -4   42.41    1.81
   2   4   4   47.77    1.80
  -3  -4  -4   16.06    0.85
  -3  -4  -4   16.94    0.86
  -3   4  -4   16.02    0.96
  -3   4  -4   15.62    1.01
  -3   4  -4   16.32    0.91
  -3   4  -4   15.04    0.83
   3   4   4   16.43    0.91
  -4  -4  -4   70.82    2.73
  -4  -4  -4   70.42    2.72
  -4   4  -4   70.10    2.55
  -4   4  -4   64.91    2.82
   4   4   4   65.96    2.76
  -4   4  -4   65.25    2.77
  -4   4  -4   70.67    2.84
  -5  -4  -4    4.73    0.58
  -5  -4  -4    4.37    0.55
   5   4   4    3.58    0.59
  -5   4  -4    4.18    0.61
  -5   4  -4    4.80    0.46
  -5   4  -4    5.25    0.66
  -5   4  -4    4.19    0.63
  -6  -4  -4    2.59    0.49
  -6  -4  -4    3.16    0.51
  -6   4  -4    2.17    0.50
  -6   4  -4    2.38    0.38
   6   4   4    1.29    0.48
  -6   4  -4    2.41    0.52
  -6  -5   4    0.06    0.25
  -6   5   4   -0.15    0.28
   6   5  -4   -0.29    0.42
  -6   5   4    0.92    0.43
  -6   5   4   -0.25    0.33
   6   5  -4    0.10    0.36
  -6   5   4    0.06    0.31
  -5  -5   4    0.04    0.24
  -5   5   4    0.31    0.29
   5   5  -4    0.28    0.29
   5   5  -4   -0.14    0.36
  -5   5   4    0.04    0.27
  -5   5   4    0.24    0.35
  -5   5   4   -0.07    0.34
  -4  -5   4   18.64    1.00
  -4   5   4   18.69    1.17
  -4   5   4   18.97    1.20
  -4   5   4   18.54    1.23
   4   5  -4   21.53    1.14
  -4   5   4   19.47    1.07
  -4   5   4   17.78    0.97
   4   5  -4   19.84    1.11
  -3  -5   4    0.88    0.24
  -3   5   4    0.75    0.34
  -3   5   4    0.91    0.35
   3   5  -4    0.96    0.32
  -3   5   4    0.96    0.29
  -3   5   4    0.71    0.43
  -3   5   4    0.62    0.23
   3   5  -4    0.78    0.31
  -3   5   4    0.61    0.21
  -2  -5   4    9.66    0.58
  -2   5   4    9.66    0.93
  -2   5   4    8.98    0.66
  -2   5   4    9.74    0.51
   2   5  -4    9.39    0.61
   2   5  -4   10.71    0.72
   2   5  -4    8.96    0.78
   2   5  -4    9.27    0.66
  -2   5   4    8.70    0.61
  -1  -5   4   41.14    1.68
   1  -5  -4   43.93    1.75
  -1   5   4   44.95    1.99
   1   5  -4   42.70    1.80
   1   5  -4   41.05    1.83
  -1   5   4   44.37    1.81
   1   5  -4   45.20    1.84
   1   5  -4   41.53    1.60
  -1   5   4   42.14    1.60
   1   5  -4   40.29    1.88
   0  -5  -4   20.52    0.98
   0  -5   4   21.06    0.92
   0   5  -4   20.08    1.18
   0   5   4   21.08    1.09
   0   5  -4   19.72    1.05
   0   5  -4   20.44    1.10
   0   5   4   20.77    0.86
   1  -5   4  144.55    5.22
  -1  -5  -4  142.98    5.28
  -1   5  -4  142.21    5.48
   1   5   4  154.06    5.21
  -1   5  -4  142.62    5.37
   1   5   4  148.53    5.41
  -1   5  -4  146.34    5.42
  -2  -5  -4   54.82    2.15
   2   5   4   52.08    2.25
  -2   5  -4   53.57    2.20
  -2   5  -4   54.55    2.36
  -2   5  -4   51.86    2.28
  -2   5  -4   50.86    2.20
   2   5   4   55.97    2.11
  -3  -5  -4    2.09    0.41
  -3  -5  -4    3.27    0.44
  -3   5  -4    1.62    0.41
   3   5   4    1.88    0.44
  -3   5  -4    2.61    0.53
  -3   5  -4    2.54    0.43
   3   5   4    2.60    0.39
  -3   5  -4    3.65    0.45
  -4  -5  -4   90.60    3.43
  -4   5  -4   90.18    3.61
  -4   5  -4   86.25    3.55
  -4   5  -4   82.95    3.47
   4   5   4   90.55    3.55
   4   5   4   84.43    3.43
  -5  -5  -4   36.17    1.69
   5   5   4   39.83    1.83
  -5   5  -4   34.72    1.79
   5   5   4   32.31    1.74
  -5   5  -4   35.05    1.76
  -5   5  -4   33.74    1.80
  -6  -5  -4    5.13    0.67
   6   5   4    5.47    0.74
  -6   5  -4    5.73    0.74
   6   5   4    4.64    0.73
  -6   5  -4    5.35    0.72
  -5  -6   4   21.50    1.18
   5   6  -4   19.79    1.27
  -5   6   4   18.97    1.34
  -5   6   4   22.14    1.37
  -5   6   4   21.38    1.28
   5   6  -4   22.69    1.30
  -4  -6   4   34.55    1.55
   4   6  -4   33.33    1.59
  -4   6   4   32.38    1.69
   4   6  -4   32.48    1.66
  -4   6   4   33.45    1.80
  -4   6   4   29.75    1.59
  -4   6   4   38.35    1.89
  -3  -6   4   12.84    0.76
   3   6  -4   11.61    0.85
  -3   6   4   11.94    0.76
  -3   6   4   11.83    1.05
  -3   6   4   11.49    0.83
   3   6  -4   11.39    0.77
   2  -6  -4   10.09    0.66
  -2  -6   4    8.39    0.59
   2   6  -4    8.65    0.57
  -2   6   4    8.98    0.67
   2   6  -4    9.14    0.73
   2   6  -4   10.16    0.86
  -2   6   4    9.14    0.96
   1  -6  -4   18.13    0.92
  -1  -6   4   16.82    0.85
   1   6  -4   15.88    0.70
  -1   6   4   17.81    1.23
   1   6  -4   15.28    0.93
  -1   6   4   17.22    0.72
   1   6  -4   16.40    1.00
  -1   6   4   15.73    0.95
   1   6  -4   19.12    1.17
   0  -6   4   46.60    1.87
   0  -6  -4   47.27    1.94
   0   6   4   45.09    2.04
   0   6  -4   46.16    2.14
   0   6  -4   47.48    2.07
   0   6   4   47.10    1.78
   0   6  -4   47.89    2.06
  -1  -6  -4   27.29    1.27
   1  -6   4   26.99    1.20
  -1   6  -4   27.84    1.49
   1   6   4   30.61    1.45
  -1   6  -4   26.92    1.37
  -1   6  -4   26.48    1.41
   1   6   4   26.58    1.16
   2  -6   4   12.46    0.71
  -2  -6  -4   12.93    0.79
  -2   6  -4   12.00    0.97
  -2   6  -4   13.11    0.85
   2   6   4   11.86    0.89
  -2   6  -4   13.96    0.95
   2   6   4   12.45    0.71
  -3  -6  -4    3.57    0.47
  -3   6  -4    2.74    0.50
  -3   6  -4    3.01    0.60
   3   6   4    2.69    0.40
  -3   6  -4    3.89    0.50
  -3   6  -4    2.92    0.56
   3   6   4    2.45    0.47
  -4  -6  -4    8.30    0.70
   4   6   4    7.19    0.70
  -4   6  -4    8.92    0.78
   4   6   4    6.89    0.81
  -4   6  -4    8.56    0.97
  -4   6  -4    7.50    0.84
  -4   6  -4    9.33    0.70
  -5  -6  -4    3.79    0.57
  -5   6  -4    4.52    0.66
   5   6   4    3.34    0.60
  -5   6  -4    4.24    0.69
  -5   6  -4    4.32    0.76
   5   6   4    2.30    0.50
  -4  -7   4    0.01    0.24
   4   7  -4   -0.34    0.28
  -4   7   4    0.00    0.49
   4   7  -4    0.27    0.31
  -3  -7   4   -0.22    0.19
   3  -7  -4    0.20    0.24
  -3   7   4   -0.47    0.47
   3   7  -4    0.00    0.28
   3   7  -4   -0.35    0.22
  -3   7   4    0.12    0.22
  -2  -7   4    0.51    0.24
   2  -7  -4    0.25    0.23
  -2   7   4    0.15    0.45
   2   7  -4    0.81    0.32
  -2   7   4    0.19    0.24
  -1  -7   4    0.74    0.25
   1  -7  -4    1.62    0.35
   1   7  -4    0.85    0.32
  -1   7   4    1.14    0.37
   1   7  -4    0.71    0.50
   0  -7   4    4.69    0.48
   0  -7  -4    5.27    0.54
   0   7  -4    5.37    0.80
   0   7  -4    3.90    0.55
   0   7   4    5.16    0.65
   0   7  -4    4.85    0.64
  -1  -7  -4    1.11    0.30
   1  -7   4    1.05    0.27
   1   7   4    1.72    0.25
  -1   7  -4    1.71    0.39
  -1   7  -4    1.76    0.56
  -1   7  -4    1.85    0.45
   1   7   4    2.09    0.46
   2  -7   4    5.22    0.53
  -2  -7  -4    4.77    0.56
   2   7   4    5.48    0.48
   2   7   4    5.59    0.70
  -2   7  -4    5.54    0.80
  -2   7  -4    6.12    0.73
  -3  -7  -4   20.63    1.17
  -3   7  -4   26.09    1.55
   3   7   4   21.85    1.35
   3   7   4   19.20    1.08
  -3   7  -4   21.40    1.22
  -3   7  -4   22.44    1.42
  -4  -7  -4    6.07    0.68
   4   7   4    4.64    0.69
  -4   7  -4    6.70    0.89
  -4   7  -4    6.18    0.75
  -4   7  -4    6.60    0.70
  -4   7  -4    6.66    0.92
   4   7   4    6.65    0.67
   3  -8  -4    7.71    0.80
  -3   8   4    8.14    0.82
   3   8  -4    5.95    0.77
  -3   8   4    6.41    1.06
   2  -8  -4   14.21    0.94
  -2  -8   4   12.24    0.85
   2   8  -4   17.30    1.14
  -2   8   4   14.73    1.03
   1  -8  -4    5.42    0.61
  -1  -8   4    4.44    0.51
   1   8  -4    5.80    0.89
   1   8  -4    5.83    0.77
  -1   8   4    6.25    0.75
   0  -8   4    1.43    0.34
   0  -8  -4    1.75    0.40
   0   8  -4    2.63    0.67
   0   8   4    3.31    0.58
   0   8  -4    1.83    0.47
   1  -8   4    6.36    0.62
  -1  -8  -4    6.12    0.69
  -1   8  -4    7.15    0.82
  -1   8  -4    5.97    0.75
   1   8   4    8.32    0.91
  -1   8  -4    7.53    0.99
   2  -8   4    0.54    0.25
  -2  -8  -4    0.37    0.29
  -2   8  -4    0.63    0.44
  -2   8  -4    1.02    0.57
   2   8   4    0.36    0.36
  -2   8  -4    1.17    0.39
   3  -8   4    1.80    0.39
  -3  -8  -4    2.06    0.46
  -3   8  -4    2.36    0.59
  -3   8  -4    1.94    0.45
   3   8   4    2.54    0.39
  -3   8  -4    1.53    0.65
   3   8   4    3.05    0.61
  -7   0   5    0.36    0.48
  -7   0   5    0.27    0.28
  -7   0   5   -0.05    0.42
   7   0  -5    0.41    0.45
   6   0  -5   -0.38    0.35
  -6   0   5    0.17    0.24
  -6   0   5    0.46    0.48
  -6   0   5    0.09    0.38
  -5   0   5    0.14    0.37
  -5   0   5   -0.18    0.44
   5   0  -5    0.03    0.35
  -5   0   5   -0.06    0.22
   4   0  -5    0.03    0.09
  -4   0   5   -0.02    0.47
   4   0  -5    0.33    0.30
  -4   0   5    0.10    0.16
  -4   0   5    0.28    0.34
  -3   0   5   -0.03    0.18
  -3   0   5    0.04    0.13
   3   0  -5   -0.19    0.17
   3   0  -5    0.05    0.06
  -3   0   5    0.41    0.37
  -2   0   5   -0.11    0.16
   2   0  -5    0.09    0.04
  -2   0   5    0.03    0.25
  -2   0   5   -0.03    0.09
   2   0  -5   -0.18    0.15
  -1   0   5    0.08    0.11
  -1   0   5   -0.21    0.14
   1   0  -5    0.11    0.08
   1   0  -5    0.00    0.10
   0   0  -5    0.01    0.06
   0   0  -5    0.04    0.04
   0   0   5   -0.01    0.06
   0   0  -5   -0.07    0.04
   0   0  -5    0.07    0.08
  -1   0  -5   -0.01    0.09
  -1   0  -5   -0.02    0.09
  -1   0  -5    0.11    0.08
   1   0   5   -0.01    0.08
  -1   0  -5    0.09    0.08
  -2   0  -5    0.06    0.10
  -2   0  -5    0.13    0.10
  -2   0  -5    0.01    0.13
   2   0   5    0.36    0.17
  -3   0  -5    0.00    0.10
  -3   0  -5   -0.02    0.12
  -3   0  -5    0.12    0.11
  -3   0  -5    0.25    0.16
  -3   0  -5    0.08    0.16
   3   0   5    0.19    0.20
  -4   0  -5    0.07    0.18
  -4   0  -5    0.01    0.13
   4   0   5   -0.51    0.27
  -4   0  -5   -0.15    0.13
  -4   0  -5   -0.25    0.20
  -4   0  -5    0.36    0.26
  -5   0  -5    0.47    0.23
  -5   0  -5    0.02    0.18
  -5   0  -5    0.22    0.27
  -5   0  -5    0.13    0.30
   5   0   5    0.27    0.39
   6   0   5   -0.42    0.40
  -6   0  -5    0.42    0.32
  -6   0  -5    0.26    0.27
  -6   0  -5    0.37    0.30
  -7   0  -5    0.12    0.32
  -7   0  -5    0.51    0.32
   7   0   5   -0.95    0.43
  -7   0  -5    0.46    0.31
  -7  -1   5    8.11    0.82
  -7  -1   5    8.51    0.95
  -7  -1   5    9.08    1.04
   7  -1  -5    8.98    0.94
  -7   1   5    8.11    0.92
  -7   1   5    8.95    1.08
   7   1  -5    7.46    0.85
  -6  -1   5   40.45    1.85
   6  -1  -5   40.61    1.91
  -6  -1   5   39.08    1.95
  -6  -1   5   42.43    2.11
  -6   1   5   39.20    1.92
  -6   1   5   41.21    2.12
  -6   1   5   40.20    1.88
   6   1  -5   39.68    1.94
  -5  -1   5   90.17    3.70
   5  -1  -5   91.12    3.50
  -5  -1   5   88.78    3.44
  -5  -1   5   90.61    3.58
  -5   1   5   89.13    3.72
  -5   1   5   88.00    3.49
  -5   1   5   90.10    3.55
   5   1  -5   87.65    3.52
  -4  -1   5  108.78    4.01
  -4  -1   5  112.54    4.16
  -4  -1   5  103.76    3.89
   4  -1  -5  108.25    3.95
   4   1  -5  101.54    3.75
   4   1  -5  107.99    3.98
  -4   1   5  101.24    3.70
  -4   1   5  100.93    3.97
  -4   1   5  105.98    4.17
  -4   1   5  103.40    3.79
  -3  -1   5   27.84    1.14
  -3  -1   5   27.25    1.24
  -3  -1   5   28.48    1.32
   3  -1  -5   26.97    1.19
   3   1  -5   26.20    1.05
  -3   1   5   26.94    1.36
   3   1  -5   28.51    1.23
  -3   1   5   27.38    1.21
  -3   1   5   25.49    1.02
   2  -1  -5   18.56    0.74
   2  -1  -5   17.94    0.81
  -2  -1   5   18.25    0.76
  -2  -1   5   18.24    0.84
  -2  -1   5   18.05    0.86
  -2   1   5   19.22    0.82
   2   1  -5   18.41    0.70
   2   1  -5   17.74    0.72
  -2   1   5   16.85    0.94
   2   1  -5   18.21    0.84
   1  -1  -5    0.09    0.09
  -1  -1   5    0.21    0.12
   1  -1  -5    0.04    0.09
   1   1  -5   -0.12    0.10
   1   1  -5    0.15    0.08
  -1   1   5    0.21    0.07
  -1   1   5    0.02    0.19
  -1   1   5   -0.02    0.09
   1   1  -5    0.14    0.07
   1   1  -5   -0.09    0.11
   0  -1  -5   80.40    2.74
   0  -1   5   82.23    2.71
   0  -1  -5   74.50    2.71
   0   1  -5   77.95    2.71
   0   1   5   79.96    2.73
   0   1  -5   72.62    2.76
   0   1  -5   74.42    2.74
   0   1  -5   73.20    2.74
  -1  -1  -5  355.06   13.13
   1  -1   5  377.77   13.33
  -1  -1  -5  376.32   13.27
  -1   1  -5  390.73   13.30
  -1   1  -5  386.70   13.50
  -1   1  -5  374.26   13.31
  -1   1  -5  393.64   13.32
  -1   1  -5  382.08   13.44
  -1   1  -5  387.52   13.35
   2  -1   5    0.33    0.13
  -2  -1  -5    0.38    0.13
  -2  -1  -5    0.16    0.13
  -2   1  -5    0.30    0.10
  -2   1  -5    0.27    0.14
  -2   1  -5    0.24    0.15
   2   1   5    0.43    0.17
  -2   1  -5    0.26    0.13
  -2   1  -5    0.28    0.13
  -3  -1  -5    0.45    0.18
  -3  -1  -5    0.75    0.23
  -3  -1  -5    0.61    0.18
   3  -1   5    0.23    0.20
  -3   1  -5    0.64    0.19
   3   1   5    0.88    0.28
  -3   1  -5    0.57    0.12
  -3   1  -5    0.67    0.20
  -3   1  -5    0.64    0.19
  -3   1  -5    0.69    0.25
  -4  -1  -5   22.46    0.99
  -4  -1  -5   22.39    1.05
   4  -1   5   22.42    1.13
  -4  -1  -5   21.65    1.06
  -4  -1  -5   22.15    1.10
  -4   1  -5   20.78    1.06
   4   1   5   22.80    1.20
  -4   1  -5   21.86    1.06
  -4   1  -5   20.93    0.87
  -4   1  -5   24.19    1.06
  -4   1  -5   21.29    1.14
  -5  -1  -5   20.35    0.94
   5  -1   5   18.19    1.12
  -5  -1  -5   19.78    1.05
  -5  -1  -5   18.88    1.08
  -5  -1  -5   18.89    1.03
  -5   1  -5   19.50    1.05
  -5   1  -5   18.08    1.03
  -5   1  -5   19.81    1.13
   5   1   5   19.31    1.20
  -5   1  -5   19.44    0.99
  -6  -1  -5   31.64    1.53
  -6  -1  -5   30.02    1.51
   6  -1   5   27.01    1.55
  -6  -1  -5   31.25    1.50
  -6   1  -5   31.25    1.53
   6   1   5   29.89    1.62
  -6   1  -5   28.01    1.47
  -6   1  -5   30.41    1.42
  -6   1  -5   30.56    1.59
  -7  -1  -5    2.02    0.47
  -7  -1  -5    1.74    0.45
  -7   1  -5    1.79    0.47
   7   1   5    1.23    0.59
  -7   1  -5    1.77    0.45
  -7   1  -5    1.70    0.46
  -7  -2   5   24.98    1.35
  -7  -2   5   24.03    1.52
  -7  -2   5   22.29    1.48
   7   2  -5   24.11    1.45
  -7   2   5   23.11    1.56
  -7   2   5   22.37    1.32
  -7   2   5   21.70    1.41
   6  -2  -5    6.45    0.78
  -6  -2   5    7.08    0.78
  -6  -2   5    6.21    0.65
  -6  -2   5    9.07    0.99
   6   2  -5    7.20    0.80
  -6   2   5    7.32    0.73
  -6   2   5    7.90    0.96
  -6   2   5    7.10    0.77
  -5  -2   5   -0.26    0.46
  -5  -2   5    0.47    0.38
   5  -2  -5    0.41    0.33
  -5  -2   5    0.45    0.24
   5   2  -5    0.00    0.19
  -5   2   5    0.50    0.35
  -5   2   5   -0.02    0.38
  -5   2   5   -0.04    0.22
  -5   2   5    0.44    0.28
   5   2  -5    0.09    0.33
  -4  -2   5    2.69    0.35
   4  -2  -5    2.43    0.39
  -4  -2   5    2.77    0.57
  -4  -2   5    2.66    0.45
   4   2  -5    2.69    0.46
  -4   2   5    2.97    0.39
  -4   2   5    2.31    0.35
  -4   2   5    3.19    0.37
   4   2  -5    2.68    0.31
  -4   2   5    1.80    0.56
  -4   2   5    2.18    0.42
  -3  -2   5   -0.10    0.24
  -3  -2   5   -0.08    0.24
   3  -2  -5    0.07    0.07
   3  -2  -5    0.18    0.18
  -3  -2   5    0.19    0.14
  -3   2   5    0.02    0.17
  -3   2   5   -0.23    0.20
   3   2  -5    0.03    0.12
  -3   2   5   -0.28    0.34
   3   2  -5    0.49    0.27
  -3   2   5    0.08    0.14
  -3   2   5   -0.06    0.18
  -2  -2   5   12.38    0.68
  -2  -2   5   11.89    0.56
   2  -2  -5   13.37    0.62
   2  -2  -5   12.30    0.56
  -2   2   5   12.37    0.59
   2   2  -5   12.93    0.52
  -2   2   5   11.88    0.52
  -2   2   5   12.42    0.61
   2   2  -5   12.29    0.66
  -2   2   5   12.09    0.79
   2   2  -5   13.41    0.60
   2   2  -5   13.45    0.61
  -2   2   5   12.86    0.65
   1  -2  -5   59.69    2.08
  -1  -2   5   52.85    2.07
  -1  -2   5   58.36    2.02
  -1   2   5   55.95    2.07
  -1   2   5   57.03    2.05
   1   2  -5   55.61    2.11
  -1   2   5   56.67    2.19
   1   2  -5   56.05    2.08
   1   2  -5   57.52    2.12
  -1   2   5   60.19    2.08
   1   2  -5   53.40    2.10
   1   2  -5   57.62    2.07
   0  -2  -5    4.97    0.29
   0  -2   5    4.66    0.25
   0  -2   5    5.08    0.23
   0  -2  -5    4.96    0.30
   0   2  -5    5.23    0.25
   0   2  -5    4.48    0.25
   0   2   5    4.77    0.35
   0   2  -5    5.12    0.37
   0   2   5    5.37    0.30
   0   2  -5    4.66    0.32
   0   2  -5    5.16    0.34
   0   2  -5    5.05    0.36
  -1  -2  -5  134.80    4.75
  -1  -2  -5  139.64    4.76
   1  -2   5  134.06    4.67
  -1   2  -5  135.67    4.77
  -1   2  -5  136.96    4.68
  -1   2  -5  122.48    4.82
  -1   2  -5  137.18    4.82
  -1   2  -5  128.34    4.67
   1   2   5  144.30    4.77
  -1   2  -5  133.79    4.78
  -2  -2  -5   42.29    1.73
   2  -2   5   45.86    1.67
  -2  -2  -5   45.61    1.75
   2   2   5   48.43    1.78
  -2   2  -5   44.70    1.80
  -2   2  -5   45.41    1.77
   3  -2   5   35.88    1.41
  -3  -2  -5   35.21    1.44
  -3  -2  -5   33.91    1.34
  -3  -2  -5   34.23    1.45
  -3   2  -5   35.00    1.39
   3   2   5   35.26    1.51
  -3   2  -5   34.89    1.49
  -3   2  -5   35.07    1.47
  -3   2  -5   32.55    1.43
   4  -2   5  276.62   10.30
  -4  -2  -5  291.49   10.25
  -4  -2  -5  284.02   10.35
  -4  -2  -5  290.73   10.34
  -4   2  -5  297.29   10.47
  -4   2  -5  296.67   10.29
  -4   2  -5  305.21   10.38
  -4   2  -5  300.51   10.37
   4   2   5  295.61   10.42
  -4   2  -5  288.90   10.37
  -5  -2  -5  164.98    6.06
  -5  -2  -5  166.99    5.97
  -5  -2  -5  164.15    6.07
  -5  -2  -5  166.96    5.90
  -5   2  -5  170.70    6.09
  -5   2  -5  162.73    6.17
  -5   2  -5  158.54    6.02
  -5   2  -5  165.53    6.09
  -5   2  -5  162.24    5.99
   5   2   5  163.50    6.15
  -6  -2  -5    6.23    0.69
  -6  -2  -5    4.83    0.64
  -6   2  -5    5.55    0.68
   6   2   5    4.25    0.70
  -6   2  -5    5.92    0.77
  -6   2  -5    5.51    0.60
  -6   2  -5    5.52    0.62
  -6   2  -5    6.34    0.72
  -7  -2  -5    8.36    0.85
  -7  -2  -5    5.54    0.70
  -7   2  -5    6.10    0.70
  -7   2  -5    5.69    0.72
   7   2   5    4.34    0.74
  -7   2  -5    5.72    0.73
  -7  -3   5    0.91    0.37
  -7  -3   5    0.18    0.47
  -7   3   5    0.68    0.44
  -7   3   5    1.55    0.53
   7   3  -5    0.74    0.52
  -7   3   5    0.54    0.36
  -6  -3   5    4.84    0.76
  -6  -3   5    6.25    0.66
  -6  -3   5    4.41    0.66
  -6   3   5    5.66    0.83
   6   3  -5    5.35    0.71
  -6   3   5    4.66    0.64
  -6   3   5    5.58    0.67
  -5  -3   5    9.05    0.84
  -5  -3   5    8.00    0.62
  -5  -3   5    8.88    0.91
  -5   3   5    7.34    0.64
  -5   3   5    7.02    0.67
   5   3  -5    8.11    0.60
  -5   3   5    8.55    0.93
   5   3  -5    8.00    0.80
  -5   3   5    7.11    0.72
  -4  -3   5    2.57    0.36
  -4  -3   5    1.43    0.49
   4  -3  -5    2.59    0.38
  -4  -3   5    2.34    0.45
  -4   3   5    1.83    0.34
   4   3  -5    1.91    0.40
  -4   3   5    2.29    0.41
  -4   3   5    1.64    0.49
  -4   3   5    1.67    0.38
  -4   3   5    2.21    0.41
   4   3  -5    2.04    0.33
  -3  -3   5   23.06    1.12
   3  -3  -5   22.50    0.90
  -3  -3   5   23.26    1.07
  -3  -3   5   22.85    0.98
   3  -3  -5   21.20    1.00
  -3   3   5   21.29    1.01
  -3   3   5   20.61    1.08
  -3   3   5   21.56    1.03
   3   3  -5   23.92    1.12
  -3   3   5   20.38    1.19
  -3   3   5   21.41    0.89
   3   3  -5   21.88    1.02
  -3   3   5   20.46    1.10
   2  -3  -5   56.50    2.16
  -2  -3   5   57.72    2.23
  -2  -3   5   58.53    2.14
  -2   3   5   60.04    2.19
   2   3  -5   62.02    2.24
   2   3  -5   59.06    2.20
  -2   3   5   56.33    2.16
  -2   3   5   56.01    2.29
   2   3  -5   58.77    2.24
   2   3  -5   59.13    2.23
   2   3  -5   57.85    2.13
  -2   3   5   57.12    2.14
  -2   3   5   54.11    2.31
  -1  -3   5   49.22    1.91
  -1  -3   5   52.88    1.87
   1  -3  -5   50.21    1.88
   1   3  -5   51.12    1.94
  -1   3   5   48.40    1.98
   1   3  -5   52.19    1.98
  -1   3   5   51.36    1.95
  -1   3   5   54.19    1.90
   1   3  -5   53.22    2.00
   1   3  -5   48.49    1.90
   1   3  -5   51.74    2.01
   0  -3  -5   36.11    1.41
   0  -3   5   36.36    1.33
   0  -3   5   33.97    1.30
   0  -3  -5   37.29    1.37
   0   3   5   34.20    1.35
   0   3  -5   37.64    1.49
   0   3  -5   35.24    1.50
   0   3   5   36.27    1.46
   0   3   5   37.68    1.37
   0   3  -5   36.28    1.31
   0   3  -5   34.63    1.45
   0   3  -5   35.12    1.45
  -1  -3  -5   17.73    0.77
  -1  -3  -5   17.38    0.75
  -1   3  -5   17.53    0.81
  -1   3  -5   16.98    0.88
  -1   3  -5   14.65    0.84
  -1   3  -5   15.29    0.62
  -1   3  -5   18.32    0.86
   1   3   5   17.54    0.75
  -1   3  -5   17.11    0.79
  -1   3  -5   16.60    0.62
  -2  -3  -5  101.41    3.62
  -2  -3  -5   99.17    3.62
   2  -3   5   94.11    3.47
  -2   3  -5   98.45    3.64
  -2   3  -5  104.08    3.49
  -2   3  -5   95.48    3.72
  -2   3  -5   99.89    3.66
  -2   3  -5   96.28    3.70
   2   3   5  103.61    3.64
  -3  -3  -5    5.59    0.51
   3  -3   5    5.13    0.38
  -3  -3  -5    5.18    0.44
  -3   3  -5    4.78    0.37
  -3   3  -5    6.34    0.52
  -3   3  -5    5.24    0.47
  -3   3  -5    4.15    0.50
   3   3   5    5.37    0.54
  -4  -3  -5    1.32    0.35
  -4  -3  -5    1.50    0.31
   4   3   5    0.97    0.38
  -4   3  -5    1.09    0.33
  -4   3  -5    0.89    0.25
  -4   3  -5    1.62    0.38
  -4   3  -5    1.28    0.35
  -5  -3  -5    9.72    0.76
  -5  -3  -5    9.41    0.71
   5   3   5   10.16    0.92
  -5   3  -5    9.62    0.66
  -5   3  -5    8.26    0.71
  -5   3  -5    9.00    0.73
  -5   3  -5    8.21    0.72
  -6  -3  -5    2.76    0.52
  -6  -3  -5    2.73    0.50
   6   3   5    2.55    0.62
  -6   3  -5    2.65    0.49
  -6   3  -5    2.89    0.43
  -6   3  -5    1.97    0.48
  -6   3  -5    3.09    0.52
  -7  -3  -5   10.94    1.07
  -7  -3  -5   11.92    0.96
  -7   3  -5   10.23    1.05
   7   3   5   12.29    1.20
  -7   3  -5   11.96    0.86
  -7  -4   5   14.86    1.21
  -7  -4   5   14.08    1.02
  -7   4   5   16.30    1.32
  -7   4   5   13.19    1.09
  -7   4   5   14.96    1.08
   7   4  -5   15.69    1.26
  -6  -4   5    0.11    0.38
  -6  -4   5    0.34    0.27
  -6   4   5    0.54    0.31
  -6   4   5   -0.01    0.32
  -6   4   5    0.10    0.31
  -6   4   5    0.22    0.42
   6   4  -5   -0.44    0.38
  -5  -4   5    4.32    0.51
  -5  -4   5    5.53    0.67
  -5   4   5    5.29    0.61
   5   4  -5    6.76    0.64
  -5   4   5    7.36    0.71
  -5   4   5    6.06    0.78
  -5   4   5    4.97    0.63
   5   4  -5    5.85    0.68
  -4  -4   5   14.44    0.95
  -4  -4   5   14.16    0.92
  -4  -4   5   13.60    0.78
  -4   4   5   12.96    0.93
   4   4  -5   13.75    0.93
  -4   4   5   14.51    0.85
  -4   4   5   13.72    0.84
  -4   4   5   13.94    1.01
   4   4  -5   14.54    0.84
   4   4  -5   14.55    0.88
  -4   4   5   13.37    0.94
  -3  -4   5   12.71    0.81
  -3  -4   5   12.20    0.75
  -3  -4   5   12.94    0.69
   3   4  -5   12.16    0.68
   3   4  -5   12.44    0.75
  -3   4   5   11.87    0.87
  -3   4   5   11.91    0.86
  -3   4   5   12.83    0.74
  -3   4   5   12.99    0.73
  -3   4   5   12.32    0.90
   3   4  -5   13.29    0.83
  -3   4   5   12.22    0.64
  -2  -4   5    0.00    0.13
  -2  -4   5   -0.08    0.21
   2  -4  -5    0.00    0.13
   2   4  -5    0.03    0.19
   2   4  -5    0.25    0.28
  -2   4   5   -0.13    0.22
   2   4  -5   -0.06    0.16
   2   4  -5    0.33    0.23
  -2   4   5    0.09    0.15
  -2   4   5    0.20    0.32
  -2   4   5   -0.13    0.15
  -2   4   5    0.13    0.14
   2   4  -5    0.10    0.18
  -1  -4   5   51.93    1.93
  -1  -4   5   51.00    1.92
   1  -4  -5   51.56    1.91
   1  -4  -5   53.29    2.01
  -1   4   5   49.61    2.00
   1   4  -5   48.56    2.04
  -1   4   5   51.65    2.03
   1   4  -5   52.70    1.91
  -1   4   5   50.14    1.91
   1   4  -5   53.59    2.12
   1   4  -5   51.80    2.03
   1   4  -5   49.88    2.06
   1   4  -5   53.67    1.93
   0  -4   5   41.65    1.55
   0  -4  -5   41.10    1.56
   0   4  -5   39.87    1.45
   0   4  -5   43.30    1.74
   0   4  -5   40.35    1.77
   0   4  -5   39.09    1.69
   0   4  -5   42.24    1.71
   0   4  -5   40.18    1.44
   0   4   5   42.99    1.56
   0   4   5   38.56    1.68
  -1  -4  -5    7.80    0.46
   1   4   5    8.51    0.59
   1   4   5    8.81    0.49
  -1   4  -5    7.84    0.68
  -1   4  -5    7.41    0.54
  -2  -4  -5   20.33    0.95
  -2  -4  -5   20.37    0.97
  -2   4  -5   21.38    1.01
  -2   4  -5   19.56    1.01
  -2   4  -5   19.66    1.14
   2   4   5   21.04    0.96
  -2   4  -5   20.52    1.08
  -3  -4  -5   35.17    1.52
  -3   4  -5   33.65    1.64
  -3   4  -5   35.96    1.54
   3   4   5   36.90    1.57
  -3   4  -5   34.11    1.57
  -3   4  -5   34.69    1.67
  -3   4  -5   35.96    1.34
  -4  -4  -5   30.18    1.40
  -4  -4  -5   31.18    1.41
  -4   4  -5   27.71    1.49
  -4   4  -5   30.03    1.50
  -4   4  -5   27.51    1.42
   4   4   5   30.43    1.47
  -4   4  -5   31.14    1.24
  -5  -4  -5   53.02    2.29
  -5  -4  -5   54.36    2.28
  -5   4  -5   50.57    2.33
  -5   4  -5   53.94    2.11
  -5   4  -5   51.98    2.35
  -5   4  -5   52.33    2.35
   5   4   5   55.67    2.39
  -6  -4  -5    3.32    0.55
  -6  -4  -5    2.63    0.49
  -6   4  -5    3.38    0.58
  -6   4  -5    2.96    0.54
  -6   4  -5    3.78    0.45
  -6   4  -5    2.49    0.53
   6   4   5    1.93    0.57
  -6  -5   5   11.48    0.84
  -6   5   5   10.51    0.97
  -6   5   5   10.09    0.86
   6   5  -5    9.61    0.97
  -6   5   5    9.95    0.86
  -5  -5   5   25.26    1.29
  -5   5   5   26.02    1.51
   5   5  -5   25.05    1.40
  -5   5   5   23.46    1.42
  -5   5   5   26.02    1.31
  -5   5   5   26.37    1.37
   5   5  -5   24.38    1.34
  -4  -5   5   14.20    0.80
   4   5  -5   13.19    0.93
  -4   5   5   12.45    0.81
  -4   5   5   12.91    0.97
  -4   5   5   12.78    0.98
  -4   5   5   13.75    0.87
  -4   5   5   12.40    1.02
   4   5  -5   14.78    0.91
  -3  -5   5    4.87    0.49
  -3  -5   5    4.97    0.48
   3   5  -5    5.29    0.47
  -3   5   5    4.46    0.69
   3   5  -5    5.99    0.58
  -3   5   5    4.47    0.57
  -3   5   5    5.34    0.44
  -3   5   5    4.42    0.50
   3   5  -5    5.07    0.58
  -3   5   5    4.43    0.43
  -2  -5   5   -0.09    0.16
   2   5  -5    0.22    0.35
   2   5  -5    0.42    0.27
  -2   5   5    0.19    0.16
  -2   5   5    0.51    0.22
  -2   5   5    0.28    0.25
   2   5  -5    0.12    0.21
  -2   5   5    0.26    0.42
   2   5  -5    0.14    0.22
  -1  -5   5   20.86    0.91
   1  -5  -5   18.33    0.95
   1   5  -5   19.09    1.04
   1   5  -5   20.59    0.85
   1   5  -5   19.02    1.13
   1   5  -5   21.82    1.09
  -1   5   5   19.50    1.01
   1   5  -5   21.00    1.03
  -1   5   5   19.53    0.84
  -1   5   5   20.30    0.95
   0  -5   5   74.48    2.78
   0  -5  -5   74.37    2.86
   0   5  -5   78.88    3.02
   0   5   5   73.64    2.96
   0   5  -5   72.92    3.04
   0   5   5   75.98    2.76
   0   5  -5   76.08    2.97
   0   5  -5   76.45    2.97
  -1  -5  -5    4.20    0.43
   1  -5   5    4.45    0.35
  -1   5  -5    4.73    0.56
   1   5   5    4.31    0.51
  -1   5  -5    4.46    0.50
  -1   5  -5    3.52    0.54
   1   5   5    3.76    0.37
  -2  -5  -5    1.18    0.30
  -2  -5  -5    0.73    0.34
  -2   5  -5    1.14    0.33
  -2   5  -5    1.08    0.45
   2   5   5    1.14    0.26
   2   5   5    1.04    0.34
  -2   5  -5    0.71    0.25
  -2   5  -5    0.65    0.31
  -3  -5  -5    1.62    0.33
  -3  -5  -5    2.34    0.38
  -3   5  -5    2.00    0.40
  -3   5  -5    1.68    0.40
  -3   5  -5    1.82    0.51
   3   5   5    2.49    0.45
   3   5   5    1.95    0.35
  -3   5  -5    2.13    0.37
  -4  -5  -5    6.72    0.65
   4   5   5    5.45    0.66
   4   5   5    4.64    0.60
  -4   5  -5    7.23    0.83
  -4   5  -5    7.55    0.80
  -4   5  -5    6.23    0.70
  -5  -5  -5    3.07    0.48
   5   5   5    2.81    0.55
   5   5   5    3.14    0.56
  -5   5  -5    2.22    0.49
  -5   5  -5    3.54    0.61
  -5   5  -5    3.09    0.60
  -6  -5  -5    0.53    0.35
  -6   5  -5    0.51    0.35
  -6   5  -5   -0.02    0.34
   6   5   5   -0.02    0.35
   6   5   5   -0.07    0.38
  -6   5  -5    0.41    0.42
  -5  -6   5    0.28    0.26
  -5   6   5    0.18    0.31
   5   6  -5   -0.35    0.26
  -5   6   5    0.27    0.33
   5   6  -5    0.13    0.38
  -4  -6   5    0.64    0.27
   4   6  -5    0.43    0.36
  -4   6   5    0.56    0.33
  -4   6   5    0.05    0.48
  -4   6   5    0.57    0.30
   4   6  -5    0.49    0.32
  -3  -6   5    5.23    0.52
  -3   6   5    5.02    0.53
  -3   6   5    5.28    0.62
   3   6  -5    5.59    0.67
  -3   6   5    5.08    0.53
  -3   6   5    3.71    0.72
   3   6  -5    4.34    0.50
   2  -6  -5    0.53    0.24
  -2  -6   5    0.70    0.22
   2   6  -5    0.69    0.29
  -2   6   5    0.73    0.18
   2   6  -5    0.90    0.36
   2   6  -5    0.41    0.22
  -2   6   5    0.83    0.48
  -2   6   5    0.57    0.25
   2   6  -5    0.63    0.43
   1  -6  -5    2.94    0.38
  -1  -6   5    3.15    0.36
   1   6  -5    3.05    0.45
   1   6  -5    3.59    0.60
   1   6  -5    2.82    0.26
   1   6  -5    2.55    0.44
  -1   6   5    3.55    0.28
  -1   6   5    3.55    0.48
   0  -6   5    0.84    0.22
   0  -6  -5    0.85    0.26
   0   6  -5    0.42    0.31
   0   6  -5    0.50    0.25
   0   6   5    0.49    0.27
   0   6   5    1.12    0.19
   0   6  -5    0.38    0.41
   1  -6   5   13.38    0.71
  -1  -6  -5   13.04    0.80
  -1   6  -5   13.50    0.87
  -1   6  -5   14.87    1.06
   1   6   5   13.05    0.70
   1   6   5   14.50    0.94
  -1   6  -5   13.28    0.95
  -2  -6  -5   17.40    0.93
   2  -6   5   15.62    0.83
  -2   6  -5   16.47    0.98
   2   6   5   15.98    0.85
  -2   6  -5   16.29    1.16
  -2   6  -5   16.58    1.08
   2   6   5   15.95    1.04
  -3  -6  -5   14.57    0.88
   3   6   5   11.73    0.81
   3   6   5   13.75    0.99
  -3   6  -5   13.98    1.10
  -3   6  -5   14.61    0.90
  -3   6  -5   15.44    1.06
  -3   6  -5   13.13    0.93
  -4  -6  -5    0.19    0.26
  -4   6  -5    0.12    0.26
  -4   6  -5    0.15    0.32
   4   6   5    0.22    0.35
   4   6   5   -0.28    0.24
  -4   6  -5    0.49    0.40
  -5  -6  -5    2.04    0.43
   5   6   5    2.13    0.55
  -5   6  -5    2.42    0.61
   5   6   5    1.31    0.45
  -5   6  -5    1.34    0.43
  -5   6  -5    1.35    0.49
  -4  -7   5   31.65    1.54
   4   7  -5   30.25    1.52
   4   7  -5   36.09    1.76
  -4   7   5   31.32    1.92
  -3  -7   5   14.85    0.88
   3  -7  -5   15.32    0.94
  -3   7   5   14.61    0.92
   3   7  -5   16.58    1.08
   3   7  -5   13.84    0.84
  -3   7   5   14.53    1.29
  -2  -7   5    1.55    0.33
   2  -7  -5    1.77    0.37
   2   7  -5    1.20    0.52
  -2   7   5    2.27    0.43
   2   7  -5    1.88    0.41
   1  -7  -5   29.75    1.39
  -1  -7   5   27.25    1.28
  -1   7   5   29.32    1.48
   1   7  -5   28.84    1.63
   1   7  -5   27.91    1.44
   1   7  -5   28.73    1.52
   0  -7   5   37.74    1.65
   0  -7  -5   37.07    1.73
   0   7   5   40.25    1.88
   0   7  -5   42.42    1.92
   0   7  -5   39.42    1.88
   0   7  -5   40.79    2.03
   1  -7   5   28.42    1.35
  -1  -7  -5   30.24    1.44
   1   7   5   31.96    1.62
  -1   7  -5   32.47    1.76
  -1   7  -5   32.09    1.64
  -1   7  -5   31.92    1.58
   1   7   5   30.00    1.30
   2  -7   5   46.82    1.94
  -2  -7  -5   45.30    2.02
  -2   7  -5   47.66    2.24
   2   7   5   47.96    2.22
   2   7   5   43.80    1.90
  -2   7  -5   47.78    2.31
  -2   7  -5   49.05    2.15
  -3  -7  -5   11.68    0.86
  -3   7  -5   12.94    0.90
  -3   7  -5   14.88    1.18
   3   7   5   13.54    1.04
   3   7   5   10.37    0.76
  -3   7  -5   11.96    1.06
  -4  -7  -5    2.85    0.51
  -4   7  -5    2.65    0.59
  -4   7  -5    2.49    0.65
  -4   7  -5    2.36    0.45
  -4   7  -5    2.71    0.54
   4   7   5    2.27    0.56
   4   7   5    1.76    0.41
   3  -8  -5    1.85    0.42
   3   8  -5    1.06    0.43
   2  -8  -5    0.17    0.25
  -2   8   5    0.28    0.29
   2   8  -5   -0.09    0.26
   1  -8  -5    5.98    0.67
   1   8  -5    5.75    0.86
   1   8  -5    4.68    0.68
  -1   8   5    6.62    0.76
   0  -8  -5    0.78    0.31
   0   8   5    0.22    0.31
   0   8  -5    0.47    0.37
   0   8  -5    1.13    0.39
   0   8  -5    1.77    0.58
  -1  -8  -5    0.15    0.26
   1   8   5    0.35    0.31
  -1   8  -5    0.00    0.31
  -1   8  -5    0.09    0.26
  -1   8  -5    0.17    0.45
  -2  -8  -5    6.17    0.69
  -2   8  -5    6.63    0.80
   2   8   5    6.06    0.78
  -2   8  -5    5.70    0.83
  -2   8  -5    6.86    0.96
  -3  -8  -5    3.02    0.53
   3   8   5    3.18    0.61
   3   8   5    2.91    0.43
  -3   8  -5    3.69    0.79
  -3   8  -5    3.32    0.56
   7   0  -6   19.84    1.32
  -7   0   6   19.87    1.23
  -7   0   6   19.04    1.36
  -7   0   6   22.14    1.49
  -6   0   6   11.71    1.18
  -6   0   6    9.71    0.97
   6   0  -6   11.46    0.92
  -6   0   6   10.21    0.80
  -5   0   6   80.25    3.14
  -5   0   6   80.89    3.25
   5   0  -6   78.69    3.19
  -5   0   6   80.05    3.42
  -4   0   6   59.78    2.61
  -4   0   6   58.74    2.42
   4   0  -6   57.34    2.07
   4   0  -6   60.73    2.38
  -4   0   6   57.98    2.32
   3   0  -6   45.33    1.80
  -3   0   6   41.66    1.72
  -3   0   6   44.32    1.96
  -3   0   6   45.71    1.82
   2   0  -6   39.22    1.50
  -2   0   6   37.19    1.56
  -2   0   6   36.33    1.44
  -2   0   6   38.08    1.49
   1   0  -6  454.05   15.42
   1   0  -6  423.02   15.41
  -1   0   6  437.66   15.29
   0   0  -6  342.64   11.73
   0   0  -6  345.44   11.96
   0   0   6  344.83   11.78
   0   0  -6  341.48   11.80
   0   0  -6  322.51   11.89
  -1   0  -6  253.43    9.35
  -1   0  -6  264.61    9.24
   1   0   6  277.41    9.24
  -1   0  -6  264.40    9.27
  -1   0  -6  272.39    9.25
  -2   0  -6  268.83    9.02
  -2   0  -6  256.76    9.02
   2   0   6  271.14    9.05
  -2   0  -6  239.16    9.01
  -3   0  -6   24.53    1.10
   3   0   6   30.17    1.20
  -3   0  -6   25.89    1.08
  -3   0  -6   24.29    1.11
  -3   0  -6   26.46    1.14
  -4   0  -6   98.22    3.64
  -4   0  -6   96.04    3.58
  -4   0  -6   97.47    3.64
  -4   0  -6   96.98    3.52
   4   0   6   95.75    3.69
  -4   0  -6   96.58    3.66
   5   0   6  318.15   11.66
  -5   0  -6  329.10   11.64
  -5   0  -6  323.28   11.60
  -5   0  -6  335.75   11.62
  -5   0  -6  330.20   11.51
  -6   0  -6   -0.14    0.22
  -6   0  -6   -0.21    0.24
   6   0   6   -0.55    0.37
  -6   0  -6    0.26    0.21
  -6   0  -6    0.10    0.27
  -7   0  -6    4.26    0.62
  -7   0  -6    4.03    0.61
   7   0   6    1.74    0.64
   7  -1  -6    7.55    0.83
  -7  -1   6    7.06    0.97
  -7  -1   6    7.71    0.81
  -7  -1   6    6.97    0.89
   7   1  -6    9.16    0.93
  -7   1   6    5.54    0.78
  -7   1   6    9.01    1.09
   6  -1  -6    8.65    0.82
  -6  -1   6    8.99    0.72
  -6  -1   6    9.27    0.91
  -6  -1   6   11.12    1.13
  -6   1   6    7.59    0.82
  -6   1   6    8.02    0.98
   6   1  -6    8.39    0.81
  -5  -1   6    0.61    0.41
  -5  -1   6    0.64    0.24
   5  -1  -6    0.68    0.37
  -5  -1   6   -0.05    0.53
   5   1  -6    0.20    0.37
  -5   1   6    0.44    0.39
  -5   1   6    0.47    0.50
   4  -1  -6   44.93    1.84
  -4  -1   6   40.88    1.76
  -4  -1   6   44.73    1.91
  -4  -1   6   43.23    2.04
   4   1  -6   42.61    1.62
   4   1  -6   42.60    1.86
  -4   1   6   42.93    2.08
  -4   1   6   43.75    1.87
  -3  -1   6   44.44    1.87
  -3  -1   6   43.48    1.80
   3  -1  -6   43.63    1.75
  -3  -1   6   42.33    1.69
  -3   1   6   43.35    1.94
   3   1  -6   42.00    1.60
  -3   1   6   45.67    1.78
   3   1  -6   43.18    1.77
  -2  -1   6    2.12    0.22
   2  -1  -6    1.75    0.23
  -2  -1   6    2.08    0.31
  -2  -1   6    3.06    0.31
   2  -1  -6    2.20    0.20
   2   1  -6    2.47    0.13
   2   1  -6    2.27    0.18
  -2   1   6    2.09    0.24
  -2   1   6    2.19    0.40
   2   1  -6    2.03    0.27
   2   1  -6    2.46    0.19
  -1  -1   6   45.00    1.56
  -1  -1   6   45.27    1.64
   1  -1  -6   44.45    1.64
   1  -1  -6   40.63    1.64
   1   1  -6   44.33    1.64
   1   1  -6   45.98    1.61
  -1   1   6   44.11    1.64
  -1   1   6   41.44    1.69
   1   1  -6   44.73    1.59
  -1   1   6   42.12    1.55
   0  -1  -6   56.42    2.02
   0  -1   6   57.94    1.99
   0  -1  -6   58.67    2.06
   0  -1  -6   54.41    1.98
   0   1  -6   51.77    2.01
   0   1   6   57.06    2.01
   0   1  -6   56.81    2.03
   0   1  -6   47.99    2.03
   0   1  -6   56.80    2.00
  -1  -1  -6   18.92    0.79
   1  -1   6   19.07    0.77
  -1  -1  -6   20.30    0.83
  -1   1  -6   20.01    0.79
   1   1   6   20.51    0.82
  -1   1  -6   17.87    0.79
  -1   1  -6   19.83    0.77
  -1   1  -6   20.19    0.83
  -1   1  -6   20.04    0.85
  -1   1  -6   20.48    0.86
   2  -1   6   63.53    2.32
  -2  -1  -6   64.01    2.26
  -2  -1  -6   60.20    2.32
  -2   1  -6   64.86    2.35
  -2   1  -6   62.00    2.37
  -2   1  -6   63.12    2.32
  -2   1  -6   65.67    2.39
  -2   1  -6   60.58    2.32
   2   1   6   64.22    2.37
  -2   1  -6   62.82    2.31
  -3  -1  -6   81.08    3.08
   3  -1   6   82.82    3.07
  -3  -1  -6   77.30    3.05
  -3   1  -6   87.25    3.10
  -3   1  -6   82.68    3.05
   3   1   6   86.15    3.13
  -3   1  -6   81.50    2.98
  -3   1  -6   81.98    3.06
  -4  -1  -6    0.15    0.14
   4  -1   6    0.18    0.29
  -4  -1  -6    0.14    0.24
  -4  -1  -6    0.10    0.19
  -4  -1  -6    0.01    0.20
   4   1   6   -0.14    0.31
  -4   1  -6    0.10    0.18
  -4   1  -6    0.18    0.10
  -4   1  -6   -0.07    0.22
  -4   1  -6    0.08    0.18
  -5  -1  -6   19.85    1.08
  -5  -1  -6   20.89    1.06
  -5  -1  -6   21.41    1.13
   5  -1   6   19.41    1.15
  -5  -1  -6   20.92    0.99
  -5   1  -6   19.91    1.07
  -5   1  -6   19.98    1.09
  -5   1  -6   20.23    1.04
  -5   1  -6   20.42    1.15
   5   1   6   18.86    1.21
  -6  -1  -6   43.10    2.01
   6  -1   6   42.15    2.07
  -6  -1  -6   45.72    2.02
  -6  -1  -6   45.80    1.99
  -6   1  -6   47.53    2.04
   6   1   6   42.40    2.13
  -6   1  -6   42.21    1.89
  -6   1  -6   45.64    2.09
  -6   1  -6   44.26    1.98
  -7  -1  -6   13.46    1.02
  -7  -1  -6   13.60    1.00
  -7   1  -6   13.19    0.95
  -7   1  -6   15.77    1.04
   7   1   6   14.78    1.23
  -7  -2   6    1.45    0.59
  -7  -2   6    1.05    0.38
  -7  -2   6    0.17    0.46
  -7   2   6    0.95    0.54
   7   2  -6    1.11    0.50
  -7   2   6   -0.32    0.40
  -7   2   6    0.99    0.39
   6  -2  -6    1.24    0.43
  -6  -2   6    1.31    0.33
  -6  -2   6    1.84    0.63
  -6  -2   6    1.19    0.47
  -6   2   6    0.07    0.38
  -6   2   6    0.45    0.30
  -6   2   6    0.93    0.54
   6   2  -6    0.81    0.42
  -5  -2   6   71.58    3.08
  -5  -2   6   70.39    2.93
  -5  -2   6   70.55    2.80
   5  -2  -6   72.63    2.84
  -5   2   6   70.35    2.91
   5   2  -6   71.12    2.90
  -5   2   6   68.88    3.07
  -5   2   6   69.03    2.79
   4  -2  -6   89.44    3.32
  -4  -2   6   88.18    3.28
  -4  -2   6   88.08    3.41
  -4  -2   6   85.59    3.47
  -4   2   6   84.57    3.35
  -4   2   6   85.77    3.27
   4   2  -6   90.50    3.38
  -4   2   6   87.25    3.57
  -4   2   6   83.33    3.17
   4   2  -6   86.46    3.19
   3  -2  -6    0.78    0.23
  -3  -2   6    1.10    0.31
  -3  -2   6    1.12    0.29
  -3  -2   6    0.84    0.19
   3  -2  -6    0.84    0.13
  -3   2   6    1.18    0.26
   3   2  -6    1.49    0.32
  -3   2   6    1.22    0.28
  -3   2   6    1.20    0.23
  -3   2   6    0.37    0.36
   3   2  -6    0.76    0.17
   2  -2  -6   11.78    0.59
   2  -2  -6   11.17    0.54
  -2  -2   6   10.99    0.63
  -2  -2   6   11.41    0.53
  -2   2   6   11.36    0.54
  -2   2   6   12.49    0.60
   2   2  -6   11.18    0.63
  -2   2   6   11.08    0.48
   2   2  -6   11.13    0.48
  -2   2   6   11.86    0.79
   2   2  -6   11.32    0.55
   2   2  -6   11.77    0.57
  -1  -2   6   11.66    0.55
   1  -2  -6   11.77    0.55
  -1  -2   6   12.55    0.48
   1   2  -6   11.70    0.57
   1   2  -6   11.76    0.56
  -1   2   6   12.30    0.55
   1   2  -6   11.74    0.58
  -1   2   6   11.07    0.50
  -1   2   6   11.51    0.69
   1   2  -6   11.93    0.54
   0  -2  -6   89.27    3.10
   0  -2   6   84.03    3.04
   0  -2  -6   90.31    3.11
   0  -2   6   87.39    3.01
   0   2  -6   83.49    3.05
   0   2  -6   84.82    3.13
   0   2  -6   92.02    3.18
   0   2   6   84.61    3.10
   0   2  -6   88.74    3.04
   0   2  -6   86.36    3.17
   0   2   6   87.07    3.10
   0   2  -6   80.40    3.13
  -1  -2  -6   66.24    2.45
   1  -2   6   67.28    2.36
  -1   2  -6   68.43    2.38
  -1   2  -6   63.87    2.52
   1   2   6   68.71    2.45
  -1   2  -6   68.79    2.51
  -1   2  -6   67.63    2.45
  -1   2  -6   63.77    2.36
  -1   2  -6   66.33    2.48
   2  -2   6   17.23    0.72
  -2  -2  -6   17.61    0.81
  -2  -2  -6   16.81    0.78
  -2   2  -6   16.61    0.73
   2   2   6   18.52    0.83
  -2   2  -6   18.18    0.82
  -2   2  -6   17.16    0.85
  -2   2  -6   16.68    0.87
  -3  -2  -6    0.84    0.22
   3  -2   6    0.81    0.21
  -3  -2  -6    0.95    0.25
  -3   2  -6    0.84    0.22
   3   2   6    0.98    0.27
  -3   2  -6    0.85    0.22
  -3   2  -6    0.68    0.23
  -3   2  -6    1.32    0.27
   4  -2   6   28.45    1.31
  -4  -2  -6   28.70    1.34
  -4  -2  -6   30.01    1.32
  -4   2  -6   24.45    1.29
  -4   2  -6   29.30    1.35
  -4   2  -6   27.98    1.31
  -4   2  -6   29.98    1.28
   4   2   6   30.33    1.44
  -5  -2  -6   24.43    1.17
  -5  -2  -6   23.19    1.03
  -5  -2  -6   21.07    1.05
  -5  -2  -6   21.26    1.17
   5   2   6   19.73    1.26
  -5   2  -6   23.18    1.16
  -5   2  -6   22.09    1.10
  -5   2  -6   19.49    1.11
  -5   2  -6   19.47    1.12
  -6  -2  -6   15.76    0.99
  -6  -2  -6   15.24    1.00
  -6   2  -6   16.57    0.95
  -6   2  -6   16.09    1.01
   6   2   6   16.69    1.14
  -6   2  -6   12.99    0.90
  -6   2  -6   14.21    1.00
  -7  -2  -6    5.17    0.69
  -7  -2  -6    5.62    0.75
  -7   2  -6    4.58    0.69
  -7   2  -6    4.72    0.60
  -7   2  -6    4.08    0.61
   7   2   6    3.35    0.71
  -7  -3   6   18.17    1.13
  -7  -3   6   14.90    1.25
  -7   3   6   16.74    1.31
   7   3  -6   16.39    1.28
  -7   3   6   15.62    1.19
  -7   3   6   18.52    1.15
  -6  -3   6   40.98    2.16
  -6  -3   6   47.83    2.31
  -6  -3   6   49.66    2.09
   6   3  -6   50.20    2.22
  -6   3   6   45.35    2.07
  -6   3   6   44.01    2.30
  -6   3   6   46.13    2.15
  -5  -3   6   39.51    1.85
  -5  -3   6   39.00    1.68
  -5  -3   6   37.22    1.92
  -5   3   6   37.22    1.69
   5   3  -6   35.62    1.78
   5   3  -6   37.72    1.62
  -5   3   6   37.72    1.96
  -5   3   6   37.83    1.78
  -4  -3   6   23.03    1.23
  -4  -3   6   22.43    1.07
  -4  -3   6   24.23    1.29
   4  -3  -6   21.84    1.10
   4   3  -6   24.40    1.22
  -4   3   6   21.59    1.12
  -4   3   6   24.57    1.39
  -4   3   6   20.15    1.13
   4   3  -6   21.53    1.06
  -4   3   6   21.94    1.09
  -3  -3   6    1.32    0.24
   3  -3  -6    1.61    0.27
  -3  -3   6    1.94    0.40
   3  -3  -6    1.51    0.20
  -3  -3   6    2.09    0.37
  -3   3   6    1.83    0.31
  -3   3   6    2.03    0.30
  -3   3   6    1.78    0.45
   3   3  -6    1.78    0.36
  -3   3   6    1.81    0.20
   3   3  -6    2.06    0.30
  -3   3   6    1.77    0.38
  -2  -3   6   17.41    0.78
  -2  -3   6   18.58    0.91
   2  -3  -6   18.24    0.82
   2   3  -6   17.83    0.78
   2   3  -6   19.92    0.90
   2   3  -6   18.86    0.90
  -2   3   6   18.91    0.83
  -2   3   6   19.27    0.84
   2   3  -6   18.77    0.86
  -2   3   6   17.35    0.79
  -2   3   6   18.33    1.00
   2   3  -6   18.21    0.87
  -1  -3   6    4.43    0.34
   1  -3  -6    3.98    0.28
  -1  -3   6    3.83    0.25
   1   3  -6    4.48    0.35
  -1   3   6    3.94    0.33
   1   3  -6    4.44    0.37
   1   3  -6    3.74    0.32
  -1   3   6    4.13    0.30
   1   3  -6    4.81    0.45
  -1   3   6    4.23    0.42
   1   3  -6    3.99    0.35
   0  -3  -6    5.10    0.35
   0  -3   6    4.78    0.27
   0  -3  -6    5.36    0.32
   0  -3   6    4.73    0.27
   0   3   6    5.39    0.33
   0   3   6    4.87    0.33
   0   3  -6    4.63    0.47
   0   3  -6    4.84    0.38
   0   3  -6    4.62    0.28
   0   3  -6    5.14    0.38
   0   3  -6    5.55    0.43
  -1  -3  -6   24.08    0.99
  -1  -3  -6   22.23    0.97
   1  -3   6   22.62    0.84
  -1   3  -6   23.92    1.10
  -1   3  -6   22.85    1.10
  -1   3  -6   21.44    0.85
   1   3   6   24.05    0.99
  -1   3  -6   22.23    0.85
  -1   3  -6   22.97    1.01
  -1   3  -6   24.33    1.07
  -1   3  -6   23.70    1.03
  -2  -3  -6   22.79    1.01
   2  -3   6   22.22    0.87
  -2  -3  -6   23.64    1.01
  -2   3  -6   21.84    0.91
   2   3   6   23.70    1.03
  -2   3  -6   22.17    1.03
  -2   3  -6   22.26    1.03
  -2   3  -6   23.66    1.14
  -2   3  -6   21.76    1.08
  -2   3  -6   23.25    0.89
   3  -3   6   89.65    3.23
  -3  -3  -6   90.74    3.32
  -3   3  -6   80.49    3.39
   3   3   6   90.95    3.37
  -3   3  -6   87.12    3.35
  -3   3  -6   91.54    3.42
  -4  -3  -6   28.07    1.29
  -4  -3  -6   27.16    1.31
  -4   3  -6   26.13    1.32
  -4   3  -6   27.05    1.19
   4   3   6   27.85    1.39
  -4   3  -6   27.00    1.34
  -4   3  -6   26.74    1.36
  -5  -3  -6   95.11    3.65
  -5  -3  -6   91.42    3.65
   5   3   6   90.75    3.73
  -5   3  -6   92.15    3.69
  -5   3  -6   94.37    3.54
  -5   3  -6   93.33    3.70
  -5   3  -6   98.42    3.70
  -6  -3  -6   63.01    2.63
  -6  -3  -6   64.44    2.66
  -6   3  -6   58.68    2.58
   6   3   6   55.89    2.70
  -6   3  -6   60.09    2.49
  -6   3  -6   62.97    2.61
  -6   3  -6   61.22    2.67
  -7  -3  -6    6.58    0.78
  -7  -3  -6    7.19    0.82
  -7   3  -6    6.02    0.77
   7   3   6    4.17    0.78
  -7   3  -6    5.53    0.61
  -7  -4   6    1.12    0.39
  -7  -4   6    1.01    0.58
  -7   4   6    0.80    0.38
  -7   4   6    0.76    0.49
  -7   4   6    1.05    0.47
   7   4  -6    1.29    0.63
  -6  -4   6    1.13    0.35
  -6  -4   6    1.60    0.52
   6   4  -6    1.27    0.53
  -6   4   6    1.33    0.39
  -6   4   6    1.93    0.59
  -6   4   6    1.12    0.43
  -5  -4   6    2.27    0.64
  -5  -4   6    2.86    0.41
  -5  -4   6    2.13    0.49
   5   4  -6    2.56    0.43
  -5   4   6    2.47    0.44
   5   4  -6    2.25    0.52
  -5   4   6    3.38    0.64
  -5   4   6    2.56    0.47
  -4  -4   6    4.92    0.60
  -4  -4   6    4.70    0.61
  -4  -4   6    4.61    0.47
  -4   4   6    4.66    0.69
   4   4  -6    4.72    0.52
   4   4  -6    5.21    0.43
  -4   4   6    4.08    0.48
  -4   4   6    3.91    0.50
  -4   4   6    3.97    0.59
   4   4  -6    4.42    0.56
  -3  -4   6    3.28    0.37
  -3  -4   6    3.51    0.47
  -3  -4   6    3.83    0.45
  -3   4   6    3.48    0.41
   3   4  -6    3.96    0.45
   3   4  -6    3.90    0.39
  -3   4   6    3.93    0.59
  -3   4   6    5.09    0.62
   3   4  -6    3.72    0.48
  -3   4   6    3.85    0.35
  -3   4   6    4.37    0.44
  -2  -4   6    2.87    0.38
   2  -4  -6    2.92    0.29
  -2  -4   6    2.63    0.28
  -2   4   6    2.28    0.29
   2   4  -6    2.10    0.40
   2   4  -6    3.05    0.38
  -2   4   6    2.48    0.29
  -2   4   6    2.65    0.42
  -2   4   6    2.59    0.50
  -2   4   6    2.60    0.33
   2   4  -6    2.29    0.36
   2   4  -6    2.89    0.38
   2   4  -6    2.76    0.32
  -1  -4   6    0.12    0.18
   1  -4  -6    0.02    0.10
   1  -4  -6    0.39    0.17
  -1  -4   6    0.20    0.12
   1   4  -6    0.52    0.20
   1   4  -6    0.06    0.26
  -1   4   6    0.24    0.20
   1   4  -6    0.02    0.20
  -1   4   6    0.09    0.12
   1   4  -6    0.23    0.12
   1   4  -6    0.26    0.19
  -1   4   6    0.23    0.19
   1   4  -6    0.25    0.19
   0  -4   6    6.82    0.37
   0  -4  -6    6.29    0.43
   0  -4  -6    6.52    0.39
   0   4  -6    6.49    0.28
   0   4  -6    5.85    0.49
   0   4   6    6.75    0.40
   0   4  -6    8.08    0.60
   0   4   6    6.65    0.37
   0   4  -6    6.53    0.34
   0   4  -6    6.12    0.48
   0   4   6    6.29    0.51
   0   4  -6    6.53    0.60
  -1  -4  -6   25.87    1.08
  -1  -4  -6   25.04    1.12
  -1   4  -6   27.84    1.29
  -1   4  -6   24.18    1.26
  -1   4  -6   24.77    1.17
   1   4   6   25.04    1.08
  -2  -4  -6   14.56    0.74
  -2  -4  -6   13.55    0.75
  -2   4  -6   14.25    0.87
  -2   4  -6   13.28    0.76
   2   4   6   13.70    0.75
  -2   4  -6   14.31    0.55
  -2   4  -6   12.70    0.87
  -2   4  -6   13.58    0.79
  -3  -4  -6    7.86    0.58
  -3  -4  -6    8.02    0.60
   3   4   6    8.92    0.64
  -3   4  -6    8.28    0.43
  -3   4  -6    9.41    0.74
  -3   4  -6    7.57    0.73
  -3   4  -6    7.66    0.62
  -4  -4  -6    9.48    0.67
   4   4   6    7.49    0.73
  -4   4  -6    9.25    0.78
  -4   4  -6    9.41    0.54
  -4   4  -6    8.01    0.70
  -4   4  -6    8.80    0.72
  -5  -4  -6   13.52    0.91
  -5  -4  -6   15.23    0.92
  -5   4  -6   13.07    0.97
  -5   4  -6   13.79    0.96
  -5   4  -6   15.07    1.02
   5   4   6   13.16    1.01
  -6  -4  -6    2.50    0.51
  -6  -4  -6    3.77    0.55
   6   4   6    2.16    0.59
  -6   4  -6    2.30    0.50
  -6   4  -6    2.96    0.56
  -6   4  -6    3.16    0.59
  -6   4  -6    3.43    0.41
  -6  -5   6    8.72    0.76
  -6   5   6   11.39    1.02
   6   5  -6    9.83    0.99
  -6   5   6    9.19    0.86
  -6   5   6    9.58    0.85
  -5  -5   6   16.60    0.98
  -5   5   6   17.53    1.22
  -5   5   6   16.33    1.03
   5   5  -6   16.57    1.15
   5   5  -6   19.73    1.10
  -5   5   6   16.40    1.04
  -4  -5   6    0.62    0.25
   4   5  -6    0.77    0.37
  -4   5   6    0.37    0.45
  -4   5   6    0.73    0.29
  -4   5   6    0.48    0.29
   4   5  -6    0.91    0.31
  -4   5   6    0.98    0.37
  -3  -5   6    0.18    0.19
  -3  -5   6    0.62    0.23
   3   5  -6    0.24    0.29
  -3   5   6    0.19    0.22
   3   5  -6    0.40    0.23
  -3   5   6    0.00    0.39
  -3   5   6    0.46    0.22
   3   5  -6    0.50    0.27
  -3   5   6    0.57    0.20
  -3   5   6    0.81    0.34
  -2  -5   6    1.23    0.24
  -2   5   6    1.12    0.31
   2   5  -6    1.00    0.27
   2   5  -6    1.42    0.29
   2   5  -6    1.17    0.41
  -2   5   6    1.52    0.29
   2   5  -6    2.04    0.38
  -2   5   6    1.25    0.23
   2   5  -6    1.73    0.35
  -1  -5   6    4.81    0.36
   1  -5  -6    4.82    0.47
   1   5  -6    3.77    0.48
   1   5  -6    4.31    0.37
   1   5  -6    4.20    0.48
  -1   5   6    4.83    0.34
   1   5  -6    4.91    0.60
  -1   5   6    4.90    0.49
   1   5  -6    4.51    0.53
  -1   5   6    3.87    0.41
   0  -5  -6    0.85    0.23
   0  -5   6    0.97    0.20
   0   5  -6    1.01    0.36
   0   5  -6    0.77    0.36
   0   5  -6    0.86    0.29
   0   5  -6    0.86    0.27
   0   5   6    0.63    0.28
   0   5   6    0.87    0.19
  -1  -5  -6    0.88    0.24
   1  -5   6    0.70    0.17
   1   5   6    0.47    0.18
  -1   5  -6    0.72    0.26
   1   5   6    0.63    0.27
  -1   5  -6    0.17    0.28
  -1   5  -6    0.17    0.32
  -2  -5  -6    0.04    0.17
  -2  -5  -6    0.19    0.21
  -2   5  -6    0.69    0.29
   2   5   6    0.23    0.28
   2   5   6    0.19    0.19
  -2   5  -6   -0.22    0.23
  -2   5  -6    0.55    0.41
  -2   5  -6    0.44    0.22
  -3  -5  -6    0.51    0.25
  -3  -5  -6    0.78    0.25
  -3   5  -6    0.20    0.24
  -3   5  -6    0.67    0.34
   3   5   6    0.40    0.32
  -3   5  -6    0.75    0.38
  -3   5  -6    0.39    0.23
   3   5   6    0.40    0.26
  -4  -5  -6    0.88    0.33
  -4  -5  -6    0.37    0.27
  -4   5  -6    1.03    0.34
  -4   5  -6    0.56    0.42
   4   5   6    0.46    0.33
  -4   5  -6    0.96    0.36
  -5  -5  -6   16.02    1.00
  -5   5  -6   17.18    1.14
  -5   5  -6   13.62    1.02
   5   5   6   13.96    1.04
  -5   5  -6   16.53    1.15
  -6  -5  -6    6.44    0.74
   6   5   6    4.96    0.75
  -6   5  -6    8.29    0.96
   6   5   6    5.07    0.76
  -6   5  -6    6.34    0.80
  -6   5  -6    5.82    0.78
  -5  -6   6   31.59    1.55
   5   6  -6   31.49    1.65
  -5   6   6   33.83    1.78
   5   6  -6   31.65    1.65
  -5   6   6   31.34    1.64
  -4  -6   6   53.67    2.21
  -4   6   6   51.22    2.18
   4   6  -6   50.31    2.34
  -4   6   6   49.68    2.38
  -4   6   6   54.31    2.54
  -4   6   6   55.00    2.32
   4   6  -6   58.87    2.31
  -3  -6   6   11.49    0.71
   3   6  -6   12.31    0.88
  -3   6   6   10.97    1.10
   3   6  -6   11.65    0.78
  -3   6   6   11.44    0.67
  -3   6   6   11.59    0.74
  -3   6   6   10.63    0.81
   2  -6  -6    6.73    0.57
  -2  -6   6    5.99    0.50
   2   6  -6    6.53    0.51
   2   6  -6    6.96    0.66
  -2   6   6    6.70    0.58
  -2   6   6    6.47    0.58
   2   6  -6    7.23    0.78
  -2   6   6    7.24    0.45
   2   6  -6    7.19    0.71
   1  -6  -6    7.67    0.59
  -1  -6   6    7.10    0.50
   1   6  -6    7.75    0.76
  -1   6   6    7.70    0.45
   1   6  -6    7.21    0.41
   1   6  -6    8.68    0.76
  -1   6   6    7.45    0.65
   1   6  -6    7.92    0.80
   1   6  -6    7.99    0.66
   0  -6  -6   40.53    1.80
   0  -6   6   41.97    1.70
   0   6  -6   44.36    1.94
   0   6   6   43.49    1.68
   0   6  -6   43.42    2.03
   0   6   6   43.10    1.93
   0   6  -6   42.31    1.92
   1  -6   6   32.67    1.37
  -1  -6  -6   31.87    1.46
   1   6   6   34.59    1.63
   1   6   6   30.40    1.35
  -1   6  -6   34.31    1.58
  -1   6  -6   32.59    1.67
  -1   6  -6   31.61    1.60
  -2  -6  -6   -0.10    0.20
   2  -6   6   -0.06    0.14
   2   6   6    0.06    0.18
  -2   6  -6   -0.26    0.25
  -2   6  -6   -0.06    0.33
  -2   6  -6    0.08    0.21
   2   6   6   -0.03    0.26
  -3  -6  -6   12.37    0.82
  -3   6  -6   12.36    0.95
  -3   6  -6   11.88    0.84
   3   6   6   12.50    0.80
   3   6   6   13.99    0.97
  -3   6  -6   11.34    1.01
  -3   6  -6   11.33    0.87
  -4  -6  -6   21.47    1.23
  -4   6  -6   22.22    1.33
   4   6   6   27.07    1.45
  -4   6  -6   24.30    1.42
  -4   6  -6   23.02    1.46
   4   6   6   23.39    1.28
  -5  -6  -6    2.82    0.52
   5   6   6    3.04    0.61
  -5   6  -6    2.91    0.63
  -5   6  -6    2.78    0.61
   5   6   6    2.07    0.48
  -5   6  -6    2.42    0.49
   4   7  -6   -0.37    0.29
  -4   7   6    0.91    0.33
   4   7  -6    0.27    0.31
   3  -7  -6    0.47    0.28
  -3   7   6    0.91    0.41
   3   7  -6    0.74    0.34
   3   7  -6    0.05    0.26
  -2  -7   6    2.63    0.38
   2  -7  -6    2.63    0.44
   2   7  -6    4.31    0.61
   2   7  -6    2.68    0.59
  -2   7   6    3.23    0.49
   1  -7  -6    3.60    0.48
  -1  -7   6    3.73    0.41
   1   7  -6    3.84    0.54
   1   7  -6    5.18    0.68
   1   7  -6    4.23    0.71
  -1   7   6    5.23    0.63
   0  -7  -6    7.05    0.62
   0  -7   6    7.88    0.56
   0   7   6    8.80    0.50
   0   7  -6    6.53    0.73
   0   7   6    8.77    0.76
   0   7  -6    8.18    0.74
   0   7  -6    7.88    0.91
   1  -7   6    0.64    0.22
  -1  -7  -6    0.55    0.28
   1   7   6    0.84    0.37
  -1   7  -6    0.90    0.40
  -1   7  -6    0.76    0.30
  -1   7  -6    0.38    0.45
   1   7   6    0.79    0.21
  -2  -7  -6    1.33    0.35
   2  -7   6    0.86    0.26
  -2   7  -6    1.35    0.44
  -2   7  -6    0.80    0.46
   2   7   6    0.79    0.24
   2   7   6    1.28    0.41
  -2   7  -6    1.81    0.42
  -3  -7  -6    2.97    0.49
   3   7   6    1.97    0.38
  -3   7  -6    2.19    0.59
   3   7   6    2.04    0.49
  -3   7  -6    2.51    0.58
  -3   7  -6    2.55    0.46
  -4  -7  -6    4.29    0.59
   4   7   6    5.40    0.62
   4   7   6    5.98    0.78
  -4   7  -6    5.15    0.85
  -4   7  -6    6.22    0.76
  -4   7  -6    5.14    0.77
   3  -8  -6   17.03    1.12
   3   8  -6   21.53    1.33
   2  -8  -6   16.16    1.03
  -2   8   6   19.14    1.15
   2   8  -6   16.88    1.34
   2   8  -6   16.18    1.17
   1  -8  -6   16.76    1.06
   1   8  -6   18.67    1.23
   1   8  -6   19.53    1.40
  -1   8   6   18.71    1.19
   0  -8  -6   15.05    1.00
   0   8  -6   17.58    1.16
   0   8  -6   15.49    1.30
   0   8   6   16.53    1.14
   0   8  -6   17.22    1.15
  -1  -8  -6    8.57    0.73
  -1   8  -6    8.44    0.89
  -1   8  -6    8.85    1.06
   1   8   6   10.96    1.02
  -1   8  -6    8.35    0.92
  -2  -8  -6    9.00    0.76
  -2   8  -6    9.08    1.10
   2   8   6    8.76    0.66
  -2   8  -6    8.57    0.96
  -2   8  -6   10.70    0.91
   2   8   6    9.39    1.00
  -7   0   7    0.29    0.29
   7   0  -7   -0.38    0.41
  -7   0   7   -0.05    0.43
  -7   0   7    0.40    0.54
  -6   0   7    0.25    0.25
   6   0  -7    0.24    0.40
  -6   0   7   -0.07    0.39
  -6   0   7    0.48    0.53
   5   0  -7   -0.08    0.33
  -5   0   7    0.18    0.55
  -5   0   7    0.09    0.41
  -5   0   7   -0.01    0.20
  -4   0   7   -0.15    0.31
  -4   0   7    0.11    0.46
  -4   0   7    0.11    0.19
   4   0  -7   -0.02    0.28
   3   0  -7    0.00    0.20
  -3   0   7    0.05    0.22
  -3   0   7    0.46    0.38
  -3   0   7    0.08    0.13
  -2   0   7    0.69    0.26
  -2   0   7   -0.19    0.13
   2   0  -7   -0.04    0.13
   1   0  -7   -0.23    0.10
   1   0  -7   -0.03    0.09
  -1   0   7   -0.21    0.10
   0   0  -7   -0.02    0.04
   0   0   7    0.09    0.09
   0   0  -7   -0.06    0.05
   0   0  -7    0.02    0.08
   0   0  -7    0.04    0.09
  -1   0  -7   -0.03    0.10
  -1   0  -7   -0.07    0.07
   1   0   7    0.13    0.09
  -1   0  -7    0.07    0.09
  -1   0  -7   -0.01    0.08
  -2   0  -7    0.17    0.12
  -2   0  -7    0.06    0.11
   2   0   7    0.05    0.11
  -2   0  -7    0.04    0.11
  -2   0  -7    0.30    0.15
  -3   0  -7    0.04    0.15
  -3   0  -7    0.02    0.11
   3   0   7   -0.02    0.19
  -3   0  -7    0.02    0.14
  -3   0  -7   -0.39    0.16
  -4   0  -7   -0.05    0.13
   4   0   7    0.10    0.30
  -4   0  -7    0.11    0.19
  -4   0  -7   -0.04    0.23
  -4   0  -7    0.25    0.18
   5   0   7   -0.14    0.37
  -5   0  -7    0.02    0.26
  -5   0  -7   -0.48    0.19
  -5   0  -7    0.38    0.21
  -6   0  -7    0.19    0.23
  -6   0  -7    0.22    0.28
   6   0   7   -0.09    0.39
  -6   0  -7    0.05    0.25
   7   0   7    0.07    0.47
  -7   0  -7   -0.08    0.26
  -7   0  -7   -0.18    0.27
  -7  -1   7   -0.09    0.46
  -7  -1   7   -0.02    0.24
   7  -1  -7    0.55    0.44
  -7  -1   7   -0.18    0.44
  -7   1   7    0.14    0.49
  -7   1   7   -0.22    0.41
   7   1  -7   -0.34    0.40
  -6  -1   7    5.33    0.87
  -6  -1   7    4.30    0.56
   6  -1  -7    4.73    0.62
  -6  -1   7    4.36    0.70
  -6   1   7    6.74    0.96
  -6   1   7    4.35    0.64
   6   1  -7    6.40    0.75
  -5  -1   7   12.51    1.15
  -5  -1   7   14.62    1.02
  -5  -1   7   12.46    0.80
   5  -1  -7   13.90    0.91
   5   1  -7   14.46    0.97
  -5   1   7   14.64    1.15
  -5   1   7   11.98    0.91
   4  -1  -7   26.02    1.23
  -4  -1   7   24.87    1.40
  -4  -1   7   23.91    1.25
  -4  -1   7   24.15    1.13
  -4   1   7   26.12    1.28
   4   1  -7   24.34    0.98
   4   1  -7   23.99    1.23
  -4   1   7   25.33    1.46
   3  -1  -7    1.59    0.27
  -3  -1   7    2.63    0.39
  -3  -1   7    2.04    0.26
  -3  -1   7    1.95    0.38
  -3   1   7    1.29    0.43
   3   1  -7    1.80    0.18
  -3   1   7    1.46    0.28
   3   1  -7    1.64    0.32
  -2  -1   7   71.80    2.81
  -2  -1   7   73.22    2.70
   2  -1  -7   73.29    2.77
   2  -1  -7   76.44    2.73
  -2  -1   7   74.81    2.78
   2   1  -7   78.21    2.63
   2   1  -7   78.02    2.65
  -2   1   7   75.24    2.92
   2   1  -7   74.70    2.78
  -2   1   7   73.55    2.76
   2   1  -7   74.20    2.67
  -1  -1   7  196.91    6.71
  -1  -1   7  194.29    6.61
   1  -1  -7  193.73    6.72
   1  -1  -7  197.05    6.73
  -1   1   7  197.68    6.71
   1   1  -7  194.02    6.68
  -1   1   7  178.64    6.75
  -1   1   7  183.06    6.60
   1   1  -7  193.57    6.67
   1   1  -7  189.28    6.71
   0  -1  -7  121.53    4.29
   0  -1   7  124.98    4.26
   0  -1  -7  116.40    4.33
   0  -1  -7  118.63    4.24
   0   1   7  124.69    4.29
   0   1  -7  124.43    4.27
   0   1  -7  120.26    4.29
   0   1  -7  118.49    4.33
  -1  -1  -7    1.89    0.21
   1  -1   7    1.68    0.17
  -1  -1  -7    1.33    0.17
  -1   1  -7    1.29    0.20
  -1   1  -7    2.11    0.21
  -1   1  -7    1.73    0.17
   1   1   7    1.50    0.20
  -1   1  -7    1.73    0.21
  -1   1  -7    1.57    0.23
  -1   1  -7    1.84    0.18
  -2  -1  -7   98.44    3.59
   2  -1   7   99.22    3.57
  -2  -1  -7  100.75    3.52
  -2  -1  -7  101.03    3.62
  -2   1  -7   99.75    3.58
  -2   1  -7   98.61    3.59
  -2   1  -7  103.35    3.58
   2   1   7  101.64    3.62
  -2   1  -7   96.73    3.64
  -2   1  -7   94.88    3.63
  -2   1  -7  101.25    3.60
   3  -1   7  218.97    7.66
  -3  -1  -7  218.49    7.68
  -3  -1  -7  227.29    7.67
  -3   1  -7  214.48    7.69
  -3   1  -7  213.26    7.64
  -3   1  -7  210.76    7.65
  -3   1  -7  213.81    7.59
  -4  -1  -7   69.25    2.57
   4  -1   7   68.39    2.64
  -4  -1  -7   62.63    2.59
  -4  -1  -7   67.83    2.64
  -4   1  -7   68.43    2.60
   4   1   7   68.02    2.69
  -4   1  -7   64.18    2.60
  -4   1  -7   65.12    2.46
  -4   1  -7   67.07    2.61
   5  -1   7   74.89    3.10
  -5  -1  -7   81.15    2.99
  -5  -1  -7   78.76    3.10
  -5  -1  -7   80.84    3.09
  -5   1  -7   73.38    3.01
  -5   1  -7   80.14    3.09
   5   1   7   75.92    3.17
  -5   1  -7   77.13    3.05
   6  -1   7   35.62    2.33
  -6  -1  -7   34.37    1.71
  -6  -1  -7   37.60    1.74
  -6   1  -7   34.31    1.68
  -6   1  -7   37.73    1.73
   6   1   7   33.63    1.83
  -6   1  -7   37.40    1.66
  -7  -1  -7    0.63    0.36
  -7  -1  -7    0.11    0.31
   7   1   7   -0.06    0.50
  -7   1  -7    0.00    0.35
  -7   1  -7    1.15    0.40
  -7   1  -7    1.03    0.39
  -7  -2   7    3.09    0.71
  -7  -2   7    2.70    0.51
  -7  -2   7    2.55    0.60
  -7   2   7    2.72    0.53
  -7   2   7    3.59    0.79
  -7   2   7    2.85    0.61
   7   2  -7    2.71    0.62
  -6  -2   7    4.13    0.68
   6  -2  -7    3.33    0.53
  -6  -2   7    3.71    0.76
  -6  -2   7    3.68    0.50
  -6   2   7    2.70    0.55
  -6   2   7    2.44    0.64
  -6   2   7    3.93    0.56
   6   2  -7    3.68    0.64
  -5  -2   7   99.76    3.96
  -5  -2   7   98.80    3.82
  -5  -2   7   93.53    3.65
   5  -2  -7   95.81    3.70
  -5   2   7   92.74    3.64
  -5   2   7   97.54    4.00
  -5   2   7   90.72    3.74
   5   2  -7   96.75    3.77
  -4  -2   7   47.84    2.06
   4  -2  -7   47.16    1.96
  -4  -2   7   46.92    2.14
  -4  -2   7   47.37    1.91
  -4   2   7   44.46    1.89
  -4   2   7   46.78    2.25
  -4   2   7   48.93    2.02
   4   2  -7   49.32    2.03
   4   2  -7   46.16    1.83
   3  -2  -7    9.80    0.49
  -3  -2   7   10.26    0.69
   3  -2  -7    9.54    0.60
  -3  -2   7    9.97    0.69
  -3  -2   7   10.47    0.55
  -3   2   7   10.16    0.64
  -3   2   7   10.36    0.56
  -3   2   7    9.38    0.82
  -3   2   7    9.40    0.39
   3   2  -7   10.53    0.53
   3   2  -7    9.98    0.64
  -2  -2   7    2.09    0.29
   2  -2  -7    1.77    0.21
   2  -2  -7    1.65    0.23
  -2  -2   7    2.14    0.21
   2   2  -7    2.13    0.25
  -2   2   7    1.78    0.21
  -2   2   7    1.80    0.17
   2   2  -7    1.65    0.26
  -2   2   7    1.62    0.24
   2   2  -7    1.93    0.22
   2   2  -7    2.03    0.18
  -2   2   7    1.80    0.41
   1  -2  -7    3.18    0.26
  -1  -2   7    3.30    0.19
  -1  -2   7    3.20    0.28
  -1   2   7    3.73    0.42
   1   2  -7    3.38    0.33
   1   2  -7    3.45    0.29
  -1   2   7    2.93    0.27
   1   2  -7    2.88    0.25
   1   2  -7    2.91    0.28
   0  -2   7   33.80    1.29
   0  -2  -7   35.83    1.34
   0  -2   7   36.18    1.23
   0  -2  -7   33.70    1.35
   0   2   7   35.53    1.35
   0   2  -7   34.81    1.38
   0   2  -7   35.80    1.42
   0   2   7   35.23    1.35
   0   2  -7   34.02    1.31
   0   2  -7   33.18    1.37
  -1  -2  -7   76.70    2.80
   1  -2   7   77.89    2.73
  -1  -2  -7   78.04    2.83
   1   2   7   79.98    2.83
  -1   2  -7   77.54    2.81
  -1   2  -7   72.10    2.84
  -1   2  -7   75.94    2.75
  -1   2  -7   79.11    2.88
  -1   2  -7   77.38    2.90
  -2  -2  -7   41.78    1.48
   2  -2   7   40.38    1.56
  -2  -2  -7   42.14    1.64
  -2  -2  -7   42.45    1.66
   2   2   7   44.77    1.68
  -2   2  -7   40.84    1.70
  -2   2  -7   43.16    1.74
  -2   2  -7   39.30    1.65
  -2   2  -7   42.00    1.58
  -3  -2  -7    3.85    0.39
   3  -2   7    3.92    0.36
  -3   2  -7    3.67    0.39
   3   2   7    3.16    0.40
  -3   2  -7    3.25    0.40
  -3   2  -7    4.02    0.44
  -4  -2  -7   19.11    1.04
  -4  -2  -7   19.07    1.01
   4  -2   7   19.62    1.01
  -4   2  -7   21.31    1.07
  -4   2  -7   22.04    1.05
  -4   2  -7   22.08    1.08
   4   2   7   19.42    1.13
  -4   2  -7   19.69    0.98
  -5  -2  -7    2.04    0.43
  -5  -2  -7    1.49    0.33
  -5   2  -7    1.69    0.39
  -5   2  -7    1.90    0.36
   5   2   7    0.42    0.40
  -5   2  -7    1.34    0.32
  -5   2  -7    1.20    0.31
  -6  -2  -7    3.41    0.53
  -6  -2  -7    2.41    0.46
   6   2   7    2.77    0.58
  -6   2  -7    2.99    0.46
  -6   2  -7    2.17    0.43
  -6   2  -7    2.37    0.47
  -6   2  -7    2.98    0.51
  -7  -2  -7   20.33    1.29
  -7  -2  -7   21.87    1.33
  -7   2  -7   21.36    1.22
   7   2   7   19.28    1.45
  -7   2  -7   24.00    1.35
  -7   2  -7   21.36    1.33
  -7  -3   7    2.15    0.46
  -7  -3   7    1.09    0.54
  -7   3   7    2.64    0.70
  -7   3   7    1.96    0.55
  -7   3   7    3.21    0.58
   7   3  -7    1.81    0.60
  -6  -3   7    7.45    0.83
  -6  -3   7    7.25    0.71
  -6  -3   7    7.88    0.99
  -6   3   7    6.24    0.76
  -6   3   7    8.13    0.98
  -6   3   7    8.81    0.73
   6   3  -7    7.28    0.81
  -5  -3   7    0.04    0.38
  -5  -3   7    0.53    0.51
  -5  -3   7    0.78    0.27
   5   3  -7    0.58    0.24
   5   3  -7    0.79    0.41
  -5   3   7    0.64    0.27
  -5   3   7    0.92    0.39
  -5   3   7    0.97    0.47
  -4  -3   7   12.62    0.94
   4  -3  -7   12.09    0.78
  -4  -3   7   13.31    0.93
  -4  -3   7   12.93    0.72
  -4   3   7   12.71    1.06
   4   3  -7   12.01    0.87
   4   3  -7   12.90    0.73
  -4   3   7   11.96    0.84
  -4   3   7   12.84    0.75
  -3  -3   7    7.19    0.64
  -3  -3   7    5.97    0.43
   3  -3  -7    6.20    0.39
   3  -3  -7    6.15    0.49
  -3   3   7    5.25    0.50
  -3   3   7    6.03    0.35
  -3   3   7    6.46    0.46
   3   3  -7    6.07    0.47
   3   3  -7    6.23    0.47
  -3   3   7    5.69    0.69
   3   3  -7    7.49    0.61
  -2  -3   7   34.52    1.38
   2  -3  -7   34.88    1.44
  -2  -3   7   34.87    1.49
   2   3  -7   35.65    1.49
  -2   3   7   36.71    1.45
   2   3  -7   37.06    1.49
   2   3  -7   37.66    1.39
   2   3  -7   39.45    1.50
   2   3  -7   36.60    1.49
  -2   3   7   33.94    1.39
  -2   3   7   36.87    1.42
  -2   3   7   34.73    1.62
  -1  -3   7   24.54    0.91
  -1  -3   7   23.75    0.99
   1  -3  -7   23.11    0.97
   1  -3  -7   24.00    1.01
   1   3  -7   22.73    1.07
  -1   3   7   24.80    0.99
   1   3  -7   22.15    1.00
   1   3  -7   23.26    1.06
  -1   3   7   22.84    1.00
   1   3  -7   23.92    0.99
  -1   3   7   24.04    1.10
   0  -3  -7    0.22    0.14
   0  -3   7    0.06    0.07
   0  -3   7    0.19    0.09
   0  -3  -7    0.42    0.12
   0   3  -7    0.00    0.17
   0   3   7    0.25    0.16
   0   3   7   -0.02    0.10
   0   3  -7    0.04    0.06
   0   3  -7    0.04    0.17
   0   3  -7    0.05    0.12
   0   3  -7    0.41    0.18
   0   3  -7    0.03    0.10
   1  -3   7   29.64    1.06
  -1  -3  -7   26.98    1.18
  -1  -3  -7   29.15    1.19
   1   3   7   30.36    1.19
  -1   3  -7   26.76    1.28
  -1   3  -7   30.14    1.28
  -1   3  -7   28.71    1.07
  -1   3  -7   29.12    1.21
  -1   3  -7   26.62    1.28
  -1   3  -7   28.94    1.23
  -2  -3  -7   13.82    0.71
  -2  -3  -7   14.63    0.70
   2  -3   7   12.68    0.56
  -2   3  -7   13.20    0.72
  -2   3  -7   12.47    0.71
   2   3   7   12.68    0.71
  -2   3  -7   14.00    0.84
  -2   3  -7   14.25    0.80
  -2   3  -7   13.54    0.58
  -2   3  -7   12.92    0.61
  -3  -3  -7    2.89    0.36
  -3  -3  -7    3.50    0.41
   3   3   7    2.91    0.42
  -3   3  -7    3.99    0.32
  -3   3  -7    3.57    0.47
  -3   3  -7    3.27    0.42
  -4  -3  -7   27.64    1.30
  -4  -3  -7   26.21    1.31
  -4   3  -7   26.69    1.35
  -4   3  -7   28.30    1.35
   4   3   7   28.09    1.39
  -5  -3  -7    3.33    0.48
  -5  -3  -7    3.59    0.52
  -5   3  -7    3.82    0.53
  -5   3  -7    3.34    0.52
  -5   3  -7    3.43    0.42
  -5   3  -7    3.11    0.53
   5   3   7    2.96    0.57
  -6  -3  -7    3.04    0.51
  -6  -3  -7    2.33    0.47
   6   3   7    2.15    0.59
  -6   3  -7    1.77    0.44
  -6   3  -7    2.44    0.51
  -6   3  -7    2.58    0.51
  -6   3  -7    2.78    0.42
  -7  -3  -7    2.66    0.54
  -7  -3  -7    3.00    0.56
  -7   3  -7    1.66    0.66
   7   3   7    2.09    0.64
  -7   3  -7    3.04    0.44
  -7   3  -7    2.14    0.51
  -7   4   7   17.41    1.16
  -6  -4   7   16.63    1.23
  -6  -4   7   17.85    1.09
  -6   4   7   20.37    1.40
   6   4  -7   18.04    1.24
  -6   4   7   18.36    1.20
  -6   4   7   18.68    1.14
  -5  -4   7   21.79    1.13
  -5  -4   7   22.74    1.30
  -5  -4   7   21.57    1.38
  -5   4   7   19.71    1.34
   5   4  -7   20.93    1.26
  -5   4   7   22.93    1.24
  -5   4   7   21.20    1.16
   5   4  -7   22.78    1.15
  -4  -4   7   84.83    3.23
  -4  -4   7   89.34    3.37
  -4  -4   7   87.83    3.38
  -4   4   7   77.53    3.25
   4   4  -7   84.13    3.22
   4   4  -7   88.33    3.36
  -4   4   7   86.87    3.52
  -4   4   7   86.68    3.28
   4   4  -7   88.19    3.30
  -4   4   7   75.91    3.32
  -3  -4   7   93.33    3.52
  -3  -4   7   92.52    3.43
   3  -4  -7   91.63    3.42
  -3  -4   7   91.69    3.55
   3   4  -7   94.55    3.54
   3   4  -7   94.28    3.51
  -3   4   7   91.70    3.48
  -3   4   7   94.19    3.69
   3   4  -7   95.82    3.56
   3   4  -7   93.24    3.50
  -3   4   7   92.62    3.39
  -3   4   7   92.82    3.47
   2  -4  -7    2.00    0.26
  -2  -4   7    2.21    0.36
  -2  -4   7    1.77    0.24
  -2   4   7    1.69    0.38
  -2   4   7    2.22    0.30
   2   4  -7    2.05    0.34
   2   4  -7    1.59    0.37
  -2   4   7    2.43    0.29
   2   4  -7    2.29    0.34
   2   4  -7    1.44    0.30
  -2   4   7    1.88    0.27
   2   4  -7    2.20    0.29
  -1  -4   7    0.85    0.16
   1  -4  -7    0.73    0.21
   1  -4  -7    0.78    0.16
  -1  -4   7    1.35    0.24
  -1   4   7    1.05    0.27
   1   4  -7    0.65    0.23
  -1   4   7    1.01    0.25
   1   4  -7    0.59    0.29
   1   4  -7    0.70    0.22
   1   4  -7    0.89    0.23
   1   4  -7    1.06    0.29
  -1   4   7    0.66    0.17
   0  -4  -7    2.20    0.26
   0  -4  -7    1.50    0.26
   0  -4   7    1.85    0.20
   0  -4   7    2.23    0.22
   0   4  -7    1.86    0.15
   0   4  -7    1.69    0.34
   0   4   7    2.73    0.38
   0   4   7    1.76    0.24
   0   4  -7    1.72    0.38
   0   4  -7    2.08    0.19
   0   4  -7    2.27    0.33
   0   4  -7    1.81    0.34
   0   4   7    2.03    0.23
  -1  -4  -7   25.81    1.12
  -1   4  -7   27.12    1.31
  -1   4  -7   23.70    1.26
   1   4   7   27.19    1.14
  -1   4  -7   27.24    1.27
  -1   4  -7   25.83    1.20
  -2  -4  -7    3.16    0.36
  -2  -4  -7    3.38    0.38
  -2   4  -7    3.71    0.21
  -2   4  -7    4.56    0.49
   2   4   7    3.41    0.38
  -2   4  -7    3.17    0.39
  -2   4  -7    3.26    0.45
  -2   4  -7    3.98    0.56
  -3  -4  -7   60.37    2.45
  -3  -4  -7   62.78    2.45
  -3   4  -7   61.96    2.61
  -3   4  -7   65.10    2.59
  -3   4  -7   64.47    2.27
  -3   4  -7   59.20    2.50
   3   4   7   58.84    2.45
  -4  -4  -7    0.94    0.30
  -4  -4  -7    1.14    0.32
  -4   4  -7    0.68    0.35
  -4   4  -7    0.82    0.20
  -4   4  -7    0.83    0.32
   4   4   7    1.14    0.34
  -4   4  -7    0.95    0.37
  -5  -4  -7    0.10    0.25
   5   4   7   -0.31    0.32
  -5   4  -7   -0.09    0.17
  -5   4  -7    0.12    0.28
  -5   4  -7    0.12    0.25
  -5   4  -7    0.00    0.33
  -6  -4  -7   34.53    1.70
  -6   4  -7   34.83    1.73
  -6   4  -7   31.94    1.69
   6   4   7   30.65    1.76
  -6   4  -7   29.39    1.66
  -6  -5   7    2.07    0.44
   6   5  -7    2.08    0.57
  -6   5   7    3.25    0.57
  -6   5   7    2.91    0.68
  -6   5   7    3.43    0.57
  -5  -5   7    0.45    0.26
  -5   5   7    0.19    0.27
  -5   5   7   -0.17    0.30
  -5   5   7    0.33    0.39
   5   5  -7    0.15    0.28
   5   5  -7    0.06    0.36
  -4  -5   7    2.14    0.37
   4   5  -7    2.83    0.45
  -4   5   7    2.94    0.43
  -4   5   7    2.92    0.44
   4   5  -7    2.09    0.46
  -4   5   7    3.09    0.57
  -3  -5   7   15.77    0.83
  -3  -5   7   13.95    0.77
   3   5  -7   14.88    0.88
   3   5  -7   14.51    0.90
   3   5  -7   15.48    0.85
   3   5  -7   13.41    0.92
  -3   5   7   14.46    0.77
  -3   5   7   13.43    0.94
  -3   5   7   13.44    0.77
  -3   5   7   15.59    0.86
  -2  -5   7   17.18    0.85
   2  -5  -7   18.86    0.95
   2   5  -7   18.07    0.92
   2   5  -7   17.85    0.91
   2   5  -7   18.40    1.02
   2   5  -7   19.69    1.01
   2   5  -7   19.41    1.08
  -2   5   7   18.04    0.93
  -2   5   7   18.68    0.87
  -2   5   7   16.99    0.98
   1  -5  -7   36.49    1.57
  -1  -5   7   36.44    1.46
  -1   5   7   39.21    1.64
   1   5  -7   40.90    1.70
  -1   5   7   36.88    1.54
   1   5  -7   34.76    1.64
   1   5  -7   37.43    1.61
  -1   5   7   36.67    1.46
   1   5  -7   34.14    1.67
   1   5  -7   36.54    1.43
   0  -5  -7   26.35    1.19
   0  -5   7   25.59    1.07
   0   5  -7   26.59    1.33
   0   5  -7   24.96    1.35
   0   5   7   25.02    1.26
   0   5  -7   25.07    1.26
   0   5   7   25.89    1.10
   0   5  -7   27.65    1.29
   1  -5   7    9.55    0.53
  -1   5  -7   10.94    0.78
   1   5   7    9.84    0.74
  -1   5  -7   10.91    0.86
  -1   5  -7    9.63    0.69
   1   5   7    9.76    0.59
  -2  -5  -7    5.00    0.51
  -2  -5  -7    6.14    0.50
   2   5   7    6.48    0.68
  -2   5  -7    5.59    0.56
   2   5   7    6.69    0.53
  -2   5  -7    5.71    0.59
  -2   5  -7    6.10    0.73
  -2   5  -7    6.36    0.69
  -3  -5  -7    2.90    0.41
  -3  -5  -7    2.63    0.39
  -3   5  -7    4.14    0.51
  -3   5  -7    2.79    0.48
  -3   5  -7    3.35    0.61
  -3   5  -7    3.57    0.51
   3   5   7    2.63    0.40
  -4  -5  -7   14.48    0.92
  -4  -5  -7   15.36    0.93
  -4   5  -7   14.69    1.02
  -4   5  -7   14.56    0.97
  -4   5  -7   15.90    1.12
   4   5   7   14.20    0.94
  -5  -5  -7   28.55    1.43
  -5   5  -7   22.58    1.42
   5   5   7   24.91    1.45
  -5   5  -7   29.88    1.56
  -5   5  -7   28.54    1.58
  -6  -5  -7   26.42    1.43
  -6   5  -7   23.83    1.45
  -6   5  -7   25.18    1.52
   6   5   7   19.56    1.41
  -6   5  -7   27.22    1.53
  -5  -6   7    4.07    0.75
  -5   6   7    3.86    0.60
   5   6  -7    3.68    0.61
  -5   6   7    4.55    0.68
  -5   6   7    3.96    0.85
   5   6  -7    5.19    0.67
  -4  -6   7    0.34    0.25
   4   6  -7    0.81    0.35
   4   6  -7    0.10    0.32
  -4   6   7    0.26    0.26
  -4   6   7    0.11    0.27
  -4   6   7    0.84    0.36
  -3  -6   7    6.81    0.56
  -3   6   7    8.05    0.61
  -3   6   7    8.30    0.72
   3   6  -7    7.80    0.70
  -3   6   7    7.59    0.56
   3   6  -7    7.43    0.66
   2  -6  -7    3.42    0.47
  -2  -6   7    3.27    0.38
   2   6  -7    2.17    0.51
   2   6  -7    2.93    0.41
   2   6  -7    3.07    0.50
  -2   6   7    3.87    0.49
   2   6  -7    3.02    0.48
  -2   6   7    3.40    0.46
   2   6  -7    3.44    0.38
  -2   6   7    3.54    0.34
  -1  -6   7    3.76    0.37
   1  -6  -7    3.35    0.43
   1   6  -7    2.65    0.43
   1   6  -7    4.53    0.66
  -1   6   7    3.51    0.49
  -1   6   7    3.56    0.32
   1   6  -7    3.07    0.37
   1   6  -7    3.73    0.52
   1   6  -7    3.21    0.55
   0  -6  -7    0.73    0.25
   0  -6   7    0.14    0.14
   0   6   7   -0.25    0.23
   0   6  -7    0.03    0.20
   0   6  -7    0.15    0.39
   0   6  -7    0.57    0.31
   0   6   7    0.33    0.15
  -1  -6  -7    1.25    0.31
   1  -6   7    0.67    0.20
   1   6   7    0.79    0.32
  -1   6  -7    0.52    0.31
   1   6   7    0.85    0.22
  -1   6  -7    1.39    0.49
  -1   6  -7    0.49    0.26
   2  -6   7    6.49    0.48
  -2  -6  -7    6.17    0.62
   2   6   7    5.71    0.69
   2   6   7    5.55    0.52
  -2   6  -7    6.21    0.72
  -2   6  -7    6.91    0.69
  -2   6  -7    6.00    0.75
  -3  -6  -7    4.92    0.57
   3   6   7    4.97    0.54
   3   6   7    5.06    0.67
  -3   6  -7    5.95    0.82
  -3   6  -7    4.41    0.65
  -3   6  -7    5.91    0.63
  -3   6  -7    4.36    0.59
  -4  -6  -7    4.92    0.59
   4   6   7    6.81    0.82
  -4   6  -7    7.83    0.89
  -4   6  -7    7.23    0.77
  -4   6  -7    5.73    0.75
   4   6   7    5.14    0.63
  -5  -6  -7    9.35    0.83
  -5   6  -7   11.55    1.18
  -5   6  -7    8.83    0.92
  -5   6  -7    9.80    1.03
   5   6   7    9.84    1.00
   5   6   7    9.11    0.90
   4   7  -7   10.90    0.86
   4   7  -7   10.71    0.91
  -4   7   7   11.44    0.92
   3  -7  -7   25.36    1.34
   3   7  -7   26.14    1.46
   3   7  -7   25.30    1.21
   2  -7  -7    7.80    0.67
   2   7  -7    7.98    0.89
   2   7  -7    8.61    0.88
  -2   7   7    7.37    0.66
   1  -7  -7    7.00    0.60
  -1   7   7    7.29    0.74
   1   7  -7    6.07    0.67
   1   7  -7    7.01    0.84
   1   7  -7    7.15    0.76
   0  -7  -7   12.16    0.81
   0   7   7   13.25    0.67
   0   7  -7   12.24    0.92
   0   7  -7   13.30    0.94
   0   7   7   11.59    0.90
   0   7  -7   11.00    1.03
  -1  -7  -7    7.99    0.66
   1   7   7    7.25    0.53
  -1   7  -7   10.39    1.05
   1   7   7    7.41    0.79
  -1   7  -7    6.69    0.78
  -1   7  -7    9.30    0.89
  -2  -7  -7   14.77    0.95
   2   7   7   16.30    1.14
   2   7   7   15.78    0.88
  -2   7  -7   16.11    1.04
  -2   7  -7   16.26    1.13
  -2   7  -7   16.39    1.25
  -3  -7  -7   12.11    0.90
   3   7   7   14.54    1.09
  -3   7  -7   15.27    0.99
   3   7   7   12.62    0.84
  -3   7  -7   15.96    1.23
  -3   7  -7   13.14    1.06
  -4  -7  -7    8.78    0.79
  -4   7  -7   11.40    1.09
  -4   7  -7    7.87    0.98
   4   7   7    9.41    0.77
   4   7   7   12.08    1.15
  -4   7  -7   12.76    1.30
   2  -8  -7    4.87    0.63
  -2   8   7    5.72    0.68
   2   8  -7    5.07    0.82
   2   8  -7    5.34    0.77
   1  -8  -7    0.43    0.28
  -1   8   7   -0.14    0.27
   1   8  -7   -0.19    0.27
   1   8  -7    0.27    0.52
   0  -8  -7    2.63    0.47
   0   8   7    3.33    0.58
   0   8  -7    2.53    0.50
   0   8  -7    2.94    0.56
   0   8  -7    2.97    0.71
  -1  -8  -7    5.00    0.63
  -1   8  -7    6.66    0.93
  -1   8  -7    5.88    0.73
   1   8   7    6.56    0.78
  -1   8  -7    5.74    0.77
  -2  -8  -7    0.82    0.34
  -2   8  -7    0.40    0.43
  -2   8  -7    0.81    0.34
  -2   8  -7    1.62    0.63
   2   8   7    1.01    0.45
   2   8   7    1.03    0.26
  -7   0   8    7.14    0.77
  -7   0   8    8.60    1.13
   7   0  -8    7.04    0.83
  -7   0   8    7.37    0.93
  -6   0   8    1.61    0.66
  -6   0   8    1.33    0.36
   6   0  -8    1.50    0.46
  -6   0   8    0.53    0.41
  -5   0   8    6.46    0.76
   5   0  -8    7.03    0.70
  -5   0   8    6.70    0.66
  -5   0   8    7.21    0.94
  -4   0   8   32.77    1.78
  -4   0   8   35.03    1.59
   4   0  -8   32.32    1.52
  -4   0   8   33.50    1.46
  -3   0   8    6.55    0.55
  -3   0   8    6.18    0.66
   3   0  -8    7.20    0.54
  -3   0   8    6.70    0.44
  -2   0   8  117.35    4.32
  -2   0   8  119.42    4.25
   2   0  -8  116.97    4.25
  -1   0   8  149.70    5.25
   1   0  -8  151.90    5.27
   1   0  -8  145.09    5.29
   0   0  -8  258.23    9.00
   0   0  -8  257.07    9.05
   0   0  -8  256.90    9.01
   0   0  -8  254.95    9.06
   0   0   8  267.57    9.00
  -1   0  -8   14.67    0.66
  -1   0  -8   15.25    0.67
  -1   0  -8   13.49    0.60
   1   0   8   15.35    0.66
  -1   0  -8   14.32    0.69
  -2   0  -8    1.23    0.21
   2   0   8    1.58    0.23
  -2   0  -8    1.21    0.20
  -2   0  -8    1.68    0.24
  -2   0  -8    1.09    0.18
  -3   0  -8   33.63    1.41
  -3   0  -8   34.88    1.40
   3   0   8   34.22    1.45
  -3   0  -8   33.89    1.43
  -4   0  -8   15.79    0.86
  -4   0  -8   15.59    0.89
  -4   0  -8   16.31    0.80
   4   0   8   17.27    0.97
  -4   0  -8   15.72    0.83
  -5   0  -8   62.77    2.58
   5   0   8   64.30    2.67
  -5   0  -8   63.68    2.52
  -5   0  -8   62.53    2.58
   6   0   8   65.64    2.99
  -6   0  -8   77.21    2.96
  -6   0  -8   71.48    2.82
  -6   0  -8   68.06    2.91
   7   0   8    5.20    0.86
  -7   0  -8    9.96    0.85
  -7   0  -8    9.68    0.85
  -7  -1   8    0.41    0.53
  -7  -1   8   -0.50    0.43
  -7  -1   8    0.73    0.33
   7  -1  -8   -0.16    0.39
   7   1  -8    0.34    0.47
  -7   1   8    0.94    0.58
  -7   1   8    0.49    0.45
  -6  -1   8    0.64    0.58
  -6  -1   8    0.08    0.22
   6  -1  -8    0.04    0.34
  -6  -1   8    0.13    0.39
   6   1  -8   -0.05    0.36
  -6   1   8    0.13    0.50
  -6   1   8    0.04    0.38
  -5  -1   8    1.38    0.51
   5  -1  -8    1.19    0.38
  -5  -1   8    1.87    0.67
  -5  -1   8    2.52    0.39
  -5   1   8    2.45    0.49
   5   1  -8    1.58    0.44
  -5   1   8    1.88    0.69
   4  -1  -8   47.16    1.96
  -4  -1   8   45.30    2.13
  -4  -1   8   48.09    2.04
  -4  -1   8   46.17    1.89
   4   1  -8   45.05    1.71
  -4   1   8   46.76    2.00
  -4   1   8   47.66    2.27
   4   1  -8   46.36    1.97
   3  -1  -8   69.96    2.70
   3  -1  -8   70.09    2.60
  -3  -1   8   70.91    2.64
  -3  -1   8   70.43    2.74
  -3  -1   8   72.97    2.81
  -3   1   8   68.67    2.91
  -3   1   8   71.10    2.72
   3   1  -8   72.83    2.73
   3   1  -8   70.49    2.54
  -2  -1   8    5.95    0.43
   2  -1  -8    5.37    0.40
  -2  -1   8    5.04    0.31
   2  -1  -8    5.94    0.36
  -2  -1   8    4.65    0.43
   2   1  -8    5.35    0.27
   2   1  -8    5.44    0.30
   2   1  -8    4.87    0.29
  -2   1   8    5.45    0.41
   2   1  -8    5.52    0.42
  -2   1   8    5.34    0.53
   1  -1  -8    0.54    0.14
  -1  -1   8    0.68    0.16
   1  -1  -8    0.41    0.13
  -1   1   8    0.37    0.14
   1   1  -8    0.54    0.11
   1   1  -8    0.47    0.14
  -1   1   8    0.46    0.22
   1   1  -8    0.60    0.12
   0  -1  -8   22.81    0.89
   0  -1  -8   24.23    0.96
   0  -1   8   23.77    0.92
   0  -1  -8   21.54    0.98
   0   1  -8   22.61    0.92
   0   1  -8   21.85    0.94
   0   1  -8   23.29    1.00
   0   1   8   23.55    0.94
   1  -1   8   13.59    0.60
  -1  -1  -8   12.92    0.60
  -1  -1  -8   14.19    0.70
  -1  -1  -8   14.66    0.66
  -1   1  -8   13.57    0.68
  -1   1  -8   13.54    0.67
   1   1   8   14.84    0.66
  -1   1  -8   13.75    0.61
  -1   1  -8   14.36    0.62
  -1   1  -8   14.27    0.57
  -1   1  -8   13.53    0.67
  -2  -1  -8    5.76    0.40
  -2  -1  -8    5.01    0.35
   2  -1   8    5.47    0.35
  -2  -1  -8    4.81    0.31
  -2   1  -8    4.67    0.34
  -2   1  -8    4.18    0.32
  -2   1  -8    5.91    0.44
  -2   1  -8    5.22    0.40
  -2   1  -8    5.04    0.35
   2   1   8    5.46    0.41
  -2   1  -8    5.13    0.37
  -3  -1  -8    0.53    0.20
   3  -1   8    0.19    0.20
   3   1   8    0.47    0.26
  -3   1  -8    0.50    0.19
  -3   1  -8    0.24    0.16
  -3   1  -8    0.51    0.20
  -3   1  -8    0.44    0.20
  -3   1  -8    0.49    0.14
  -4  -1  -8   25.86    1.29
  -4  -1  -8   27.84    1.27
   4  -1   8   29.03    1.31
   4   1   8   27.05    1.36
  -4   1  -8   26.25    1.25
  -4   1  -8   27.86    1.15
  -4   1  -8   27.99    1.27
  -4   1  -8   27.53    1.27
  -5  -1  -8   39.85    1.70
  -5  -1  -8   36.30    1.69
  -5  -1  -8   38.41    1.61
   5  -1   8   35.61    1.72
  -5  -1  -8   38.41    1.61
   5   1   8   36.20    1.79
  -5   1  -8   34.51    1.63
  -5   1  -8   36.25    1.65
  -5   1  -8   36.16    1.67
  -6  -1  -8    3.39    0.54
  -6  -1  -8    2.53    0.48
   6   1   8    2.82    0.62
  -6   1  -8    3.72    0.53
  -6   1  -8    2.91    0.49
  -6   1  -8    3.07    0.47
  -7  -1  -8    0.79    0.37
  -7  -1  -8    0.06    0.31
  -7   1  -8    0.91    0.37
  -7   1  -8    0.79    0.32
   7   1   8   -0.26    0.50
  -7   1  -8    0.45    0.34
  -7  -2   8    1.97    0.58
  -7  -2   8    3.53    0.56
  -7  -2   8    3.00    0.76
  -7   2   8    3.35    0.66
  -7   2   8    2.55    0.50
   7   2  -8    3.63    0.67
  -7   2   8    3.58    0.81
  -6  -2   8   20.75    1.35
   6  -2  -8   20.87    1.22
  -6  -2   8   20.77    1.15
  -6  -2   8   20.86    1.50
  -6   2   8   20.09    1.28
   6   2  -8   19.96    1.28
  -6   2   8   20.76    1.16
  -6   2   8   22.95    1.54
  -5  -2   8    0.29    0.52
  -5  -2   8    0.84    0.39
   5  -2  -8   -0.03    0.30
  -5  -2   8    0.39    0.22
   5   2  -8    0.69    0.38
  -5   2   8    0.47    0.35
  -5   2   8    0.04    0.23
  -5   2   8    0.28    0.52
  -4  -2   8   27.75    1.47
   4  -2  -8   26.85    1.27
  -4  -2   8   27.63    1.40
  -4  -2   8   26.45    1.20
  -4   2   8   26.37    1.19
   4   2  -8   26.65    1.12
   4   2  -8   26.51    1.32
  -4   2   8   26.71    1.32
  -4   2   8   24.16    1.55
  -3  -2   8    0.94    0.20
   3  -2  -8    1.26    0.27
   3  -2  -8    1.13    0.18
  -3  -2   8    1.36    0.36
  -3  -2   8    1.40    0.34
  -3   2   8    0.94    0.19
   3   2  -8    0.75    0.17
  -3   2   8    0.90    0.27
  -3   2   8    1.44    0.48
   3   2  -8    0.73    0.18
   3   2  -8    0.80    0.31
   2  -2  -8   -0.02    0.12
  -2  -2   8   -0.15    0.15
  -2  -2   8    0.15    0.10
   2  -2  -8   -0.09    0.09
   2   2  -8    0.11    0.11
   2   2  -8    0.00    0.08
  -2   2   8   -0.03    0.09
  -2   2   8   -0.02    0.33
   2   2  -8    0.10    0.18
  -2   2   8   -0.05    0.13
  -2   2   8   -0.06    0.07
   2   2  -8    0.15    0.14
   1  -2  -8   14.86    0.71
  -1  -2   8   15.15    0.67
   1  -2  -8   14.71    0.68
  -1  -2   8   14.97    0.56
   1   2  -8   13.76    0.67
   1   2  -8   14.18    0.65
  -1   2   8   15.07    0.68
  -1   2   8   15.08    0.81
   1   2  -8   13.81    0.69
   1   2  -8   14.21    0.68
   0  -2   8   12.72    0.57
   0  -2  -8   13.98    0.62
   0  -2   8   13.96    0.51
   0  -2   8   13.52    0.49
   0  -2  -8   14.12    0.64
   0   2   8   14.19    0.64
   0   2  -8   13.66    0.65
   0   2  -8   13.76    0.59
   0   2  -8   11.47    0.66
   0   2   8   13.01    0.63
   0   2  -8   13.11    0.65
  -1  -2  -8   22.24    0.95
  -1  -2  -8   20.45    0.90
   1  -2   8   22.95    0.86
  -1   2  -8   22.62    1.02
  -1   2  -8   20.75    0.92
  -1   2  -8   21.44    0.87
  -1   2  -8   21.21    0.98
   1   2   8   22.59    0.95
  -2  -2  -8    0.59    0.17
  -2  -2  -8    0.73    0.10
  -2  -2  -8    0.71    0.19
   2  -2   8    0.68    0.14
   2   2   8    0.49    0.20
  -2   2  -8    0.37    0.18
  -2   2  -8    0.57    0.15
  -2   2  -8    0.67    0.15
  -2   2  -8    0.62    0.19
  -2   2  -8    0.52    0.22
   3  -2   8   83.28    3.12
  -3  -2  -8   88.98    3.20
  -3  -2  -8   86.18    3.22
   3   2   8   85.19    3.25
  -3   2  -8   83.12    3.17
  -3   2  -8   88.74    3.23
  -3   2  -8   86.67    3.14
  -3   2  -8   79.15    3.23
   4  -2   8   30.96    1.38
  -4  -2  -8   31.60    1.41
  -4   2  -8   29.07    1.42
  -4   2  -8   30.86    1.43
  -4   2  -8   33.47    1.43
  -5  -2  -8   13.18    0.83
  -5  -2  -8   12.17    0.83
  -5   2  -8   13.69    0.80
   5   2   8   12.39    0.93
  -5   2  -8   12.47    0.83
  -5   2  -8   11.73    0.82
  -5   2  -8   11.71    0.80
  -6  -2  -8   27.85    1.45
  -6  -2  -8   27.36    1.47
  -6   2  -8   24.93    1.38
  -6   2  -8   30.06    1.48
  -6   2  -8   29.32    1.40
  -6   2  -8   25.24    1.44
   6   2   8   29.26    1.62
  -7  -2  -8    0.14    0.35
  -7   2  -8    0.26    0.32
   7   2   8   -0.15    0.48
  -7   2  -8    0.71    0.34
  -7  -3   8    9.59    0.81
  -7  -3   8    9.47    1.05
  -7   3   8   11.90    1.31
   7   3  -8    9.66    1.01
  -7   3   8    9.43    0.83
  -7   3   8    7.39    0.89
  -6  -3   8   22.23    1.20
  -6  -3   8   21.73    1.40
  -6  -3   8   20.60    1.52
  -6   3   8   22.47    1.33
   6   3  -8   22.76    1.37
  -6   3   8   22.71    1.51
  -6   3   8   22.22    1.22
  -5  -3   8   89.13    3.52
  -5  -3   8   83.99    3.59
  -5  -3   8   86.66    3.34
  -5   3   8   86.16    3.69
  -5   3   8   87.59    3.45
   5   3  -8   86.66    3.46
  -5   3   8   83.36    3.34
  -4  -3   8  118.01    4.29
  -4  -3   8  115.14    4.45
  -4  -3   8  118.54    4.46
   4  -3  -8  121.14    4.35
  -4   3   8  110.47    4.29
   4   3  -8  117.32    4.28
  -4   3   8  117.11    4.64
  -4   3   8  116.05    4.38
   4   3  -8  115.13    4.40
   3  -3  -8   43.07    1.68
  -3  -3   8   48.50    1.90
   3  -3  -8   45.61    1.78
  -3  -3   8   43.55    1.70
  -3  -3   8   43.82    1.84
   3   3  -8   40.55    1.80
  -3   3   8   42.68    2.03
  -3   3   8   40.85    1.72
  -3   3   8   45.04    1.79
  -3   3   8   41.39    1.60
   3   3  -8   42.72    1.71
   3   3  -8   43.39    1.76
  -2  -3   8    1.88    0.21
   2  -3  -8    1.84    0.26
   2  -3  -8    1.54    0.25
  -2  -3   8    2.58    0.36
   2   3  -8    1.94    0.23
  -2   3   8    1.86    0.22
   2   3  -8    2.14    0.32
   2   3  -8    1.80    0.27
   2   3  -8    1.88    0.30
  -2   3   8    1.98    0.45
  -2   3   8    1.75    0.26
  -2   3   8    1.60    0.22
  -1  -3   8   19.05    0.73
   1  -3  -8   18.04    0.83
   1  -3  -8   18.96    0.82
  -1  -3   8   18.05    0.81
   1   3  -8   18.55    0.91
   1   3  -8   17.36    0.81
  -1   3   8   18.95    0.83
  -1   3   8   17.56    0.94
   1   3  -8   19.26    0.85
  -1   3   8   17.52    0.84
   1   3  -8   18.65    0.90
   1   3  -8   17.97    0.87
   0  -3  -8  109.73    3.73
   0  -3   8  102.65    3.60
   0  -3  -8  105.14    3.73
   0  -3   8  101.28    3.64
   0   3   8   96.38    3.70
   0   3  -8   98.75    3.78
   0   3  -8  100.12    3.82
   0   3   8  106.07    3.72
   0   3  -8  108.07    3.84
   0   3  -8  101.20    3.65
   0   3  -8  106.59    3.79
   0   3  -8  101.11    3.62
  -1  -3  -8   47.60    1.79
  -1  -3  -8   45.15    1.77
   1  -3   8   46.29    1.65
  -1   3  -8   40.44    1.64
  -1   3  -8   49.61    1.81
   1   3   8   47.33    1.78
  -1   3  -8   41.72    1.80
  -1   3  -8   48.78    1.88
  -1   3  -8   47.89    1.67
   1   3   8   44.04    1.63
  -1   3  -8   42.73    1.87
  -1   3  -8   45.07    1.90
  -2  -3  -8   39.65    1.61
  -2  -3  -8   39.22    1.59
   2  -3   8   39.96    1.46
  -2   3  -8   41.06    1.70
  -2   3  -8   34.25    1.59
  -2   3  -8   41.19    1.48
  -2   3  -8   41.20    1.75
   2   3   8   39.81    1.62
  -2   3  -8   37.10    1.49
  -3  -3  -8    3.49    0.42
  -3  -3  -8    2.48    0.36
   3   3   8    2.50    0.37
  -3   3  -8    3.91    0.47
  -3   3  -8    2.83    0.41
  -3   3  -8    3.52    0.31
  -4  -3  -8    0.28    0.24
  -4   3  -8    0.15    0.21
  -4   3  -8    0.09    0.26
  -4   3  -8    0.16    0.16
   4   3   8    0.06    0.27
  -5  -3  -8   10.37    0.75
   5   3   8   10.10    0.94
  -5   3  -8    8.64    0.76
  -5   3  -8    9.88    0.78
  -6  -3  -8    0.18    0.29
  -6  -3  -8    0.74    0.29
  -6   3  -8    0.09    0.29
  -6   3  -8    0.40    0.31
  -6   3  -8    0.01    0.28
   6   3   8   -0.78    0.37
  -7  -3  -8   14.03    1.04
  -7   3  -8   14.95    1.02
   7   3   8    9.49    1.10
  -7   3  -8   11.29    1.01
  -6  -4   8   20.00    1.14
  -6  -4   8   20.76    1.40
  -6   4   8   22.05    1.48
   6   4  -8   20.32    1.31
  -6   4   8   19.26    1.23
  -6   4   8   17.46    1.14
  -5  -4   8    4.30    0.76
  -5  -4   8    3.97    0.49
  -5  -4   8    4.80    0.66
   5   4  -8    4.01    0.62
  -5   4   8    5.23    0.59
   5   4  -8    5.03    0.55
  -5   4   8    4.94    0.61
  -5   4   8    5.44    0.79
  -4  -4   8   13.92    0.78
  -4  -4   8   13.98    0.95
  -4  -4   8   14.55    0.98
   4   4  -8   12.61    0.89
  -4   4   8   13.63    1.06
   4   4  -8   14.66    0.84
  -4   4   8   14.60    0.83
  -4   4   8   12.00    0.83
  -3  -4   8    5.35    0.51
  -3  -4   8    5.45    0.43
   3  -4  -8    5.50    0.43
  -3  -4   8    5.66    0.60
  -3   4   8    5.72    0.51
   3   4  -8    5.35    0.54
  -3   4   8    5.62    0.46
  -3   4   8    5.25    0.39
  -3   4   8    5.68    0.69
   3   4  -8    5.03    0.48
   3   4  -8    5.38    0.54
   3   4  -8    6.05    0.59
   2  -4  -8   17.32    0.83
  -2  -4   8   18.00    0.79
  -2  -4   8   18.54    0.93
   2   4  -8   18.44    0.93
   2   4  -8   18.00    0.85
   2   4  -8   16.02    0.90
  -2   4   8   18.31    0.85
  -2   4   8   18.09    0.85
   2   4  -8   16.96    0.89
  -2   4   8   16.09    0.98
   2   4  -8   17.07    0.95
  -1  -4   8   12.41    0.57
  -1  -4   8   13.11    0.67
   1  -4  -8   12.05    0.68
   1  -4  -8   12.44    0.62
   1   4  -8   11.73    0.79
   1   4  -8   13.03    0.71
   1   4  -8   12.28    0.74
  -1   4   8   13.88    0.73
   1   4  -8   11.82    0.75
  -1   4   8   12.31    0.72
   1   4  -8   12.31    0.65
  -1   4   8   13.42    0.65
   0  -4  -8    1.95    0.25
   0  -4   8    1.88    0.20
   0  -4  -8    1.92    0.28
   0   4  -8    2.10    0.40
   0   4  -8    1.54    0.15
   0   4   8    1.74    0.25
   0   4   8    1.73    0.34
   0   4  -8    1.39    0.29
   0   4   8    1.83    0.24
   0   4  -8    1.73    0.20
   0   4  -8    2.20    0.43
   0   4  -8    1.85    0.34
  -1  -4  -8   17.02    0.83
  -1  -4  -8   16.63    0.81
  -1   4  -8   15.61    0.86
  -1   4  -8   17.22    0.98
  -1   4  -8   14.92    0.63
  -1   4  -8   17.39    0.64
  -1   4  -8   17.69    1.00
   1   4   8   16.70    0.81
  -1   4  -8   16.45    0.92
  -2  -4  -8    0.09    0.18
  -2  -4  -8   -0.07    0.13
  -2   4  -8    0.05    0.15
  -2   4  -8   -0.04    0.19
  -2   4  -8    0.02    0.06
  -2   4  -8   -0.33    0.22
   2   4   8   -0.12    0.18
  -2   4  -8   -0.24    0.24
  -3  -4  -8    9.54    0.64
  -3  -4  -8    7.93    0.60
  -3   4  -8    8.19    0.44
  -3   4  -8    8.33    0.65
   3   4   8    7.82    0.64
  -3   4  -8    8.70    0.73
  -3   4  -8    7.40    0.71
  -4  -4  -8   10.89    0.73
  -4  -4  -8    9.28    0.73
  -4   4  -8   10.47    0.83
  -4   4  -8    9.00    0.74
  -4   4  -8   10.02    0.85
   4   4   8    9.66    0.78
  -4   4  -8   10.13    0.57
  -5  -4  -8    0.28    0.26
  -5  -4  -8   -0.13    0.27
  -5   4  -8   -0.27    0.15
  -5   4  -8    0.56    0.38
  -5   4  -8    0.27    0.28
   5   4   8    0.58    0.39
  -5   4  -8   -0.05    0.27
  -6  -4  -8    5.21    0.67
  -6   4  -8    4.83    0.70
  -6   4  -8    4.92    0.67
  -6   4  -8    4.30    0.50
  -6   4  -8    4.85    0.67
   6   4   8    4.63    0.71
  -6  -5   8    8.78    0.77
  -6   5   8    9.50    0.83
  -6   5   8    8.95    1.06
  -6   5   8    8.07    0.83
   6   5  -8    8.52    0.93
  -5  -5   8  108.66    4.15
  -5   5   8  111.10    4.23
   5   5  -8  116.87    4.26
  -5   5   8  103.74    4.43
  -5   5   8  102.25    4.18
   5   5  -8  111.35    4.28
  -4  -5   8   30.53    1.40
   4   5  -8   32.84    1.54
  -4   5   8   29.42    1.44
  -4   5   8   29.91    1.63
  -4   5   8   31.34    1.47
   4   5  -8   32.74    1.55
  -3  -5   8   15.46    0.81
  -3   5   8   16.55    0.90
   3   5  -8   16.58    0.96
   3   5  -8   15.88    0.97
   3   5  -8   14.86    0.91
   3   5  -8   16.79    0.90
  -3   5   8   14.42    0.79
  -3   5   8   14.72    0.99
  -3   5   8   16.23    0.85
  -2  -5   8   39.96    1.61
   2  -5  -8   40.37    1.73
   2   5  -8   40.21    1.68
   2   5  -8   44.03    1.86
   2   5  -8   42.26    1.82
  -2   5   8   40.25    1.70
   2   5  -8   38.60    1.67
  -2   5   8   39.89    1.78
  -2   5   8   40.35    1.64
   2   5  -8   42.13    1.79
  -1  -5   8   15.99    0.73
   1  -5  -8   15.82    0.85
   1   5  -8   16.13    0.93
  -1   5   8   15.89    0.89
   1   5  -8   17.04    0.97
  -1   5   8   15.59    0.76
   1   5  -8   16.36    0.91
   1   5  -8   15.91    0.76
  -1   5   8   15.47    0.82
   1   5  -8   15.44    1.00
   0  -5  -8   29.29    1.30
   0  -5   8   30.19    1.17
   0   5  -8   26.14    1.34
   0   5   8   29.64    1.39
   0   5  -8   28.48    1.38
   0   5  -8   27.83    1.42
   0   5  -8   31.07    1.50
   0   5   8   27.72    1.21
   1  -5   8   -0.10    0.12
  -1  -5  -8    0.05    0.18
  -1   5  -8    0.04    0.27
   1   5   8   -0.03    0.15
  -1   5  -8    0.10    0.18
  -1   5  -8    0.00    0.31
  -1   5  -8    0.20    0.34
   1   5   8    0.38    0.28
  -2  -5  -8    0.87    0.24
  -2  -5  -8    0.56    0.25
  -2   5  -8    1.32    0.31
  -2   5  -8    0.94    0.33
  -2   5  -8    0.57    0.37
  -2   5  -8    0.54    0.28
   2   5   8    0.61    0.24
  -3  -5  -8    0.99    0.29
  -3  -5  -8    1.38    0.32
   3   5   8    1.10    0.31
  -3   5  -8    0.92    0.35
  -3   5  -8    1.66    0.50
  -3   5  -8    1.51    0.33
  -3   5  -8    1.41    0.36
  -4  -5  -8    3.86    0.52
  -4  -5  -8    5.45    0.61
  -4   5  -8    5.32    0.74
   4   5   8    3.90    0.56
  -4   5  -8    4.37    0.63
  -4   5  -8    4.92    0.63
  -5  -5  -8   -0.35    0.47
  -5  -5  -8    0.34    0.29
  -5   5  -8   -0.06    0.38
  -5   5  -8    0.06    0.27
   5   5   8   -0.17    0.31
  -5   5  -8   -0.09    0.32
  -6  -5  -8    8.21    0.82
  -6   5  -8    8.49    0.96
  -6   5  -8    7.70    0.87
   6   5   8    5.82    0.80
  -6   5  -8    8.20    0.93
  -5   6   8    0.09    0.30
  -5   6   8    0.94    0.40
  -5   6   8    0.15    0.28
   5   6  -8   -0.30    0.24
   5   6  -8   -0.30    0.37
   4   6  -8    1.45    0.42
  -4   6   8    1.35    0.39
   4   6  -8    1.40    0.39
  -4   6   8    1.32    0.41
  -4   6   8    1.62    0.36
   3   6  -8    1.07    0.34
  -3   6   8    1.14    0.36
   3   6  -8    0.99    0.35
   3   6  -8    0.66    0.42
  -3   6   8    1.17    0.27
  -2  -6   8   20.56    1.06
   2  -6  -8   21.31    1.14
   2   6  -8   22.83    1.03
  -2   6   8   24.21    1.16
   2   6  -8   19.88    1.24
   2   6  -8   25.15    1.25
  -2   6   8   22.93    1.02
   2   6  -8   21.40    1.22
   2   6  -8   20.05    1.08
  -2   6   8   23.19    1.16
  -1  -6   8   32.06    1.40
   1  -6  -8   32.19    1.53
   1   6  -8   37.29    1.70
   1   6  -8   33.90    1.71
  -1   6   8   37.55    1.63
  -1   6   8   33.06    1.40
   1   6  -8   35.38    1.59
   1   6  -8   33.75    1.65
   0  -6   8   18.14    0.86
   0  -6  -8   18.97    1.00
   0   6  -8   18.78    1.08
   0   6  -8   18.27    1.16
   0   6   8   19.75    1.12
   0   6   8   17.88    0.88
   0   6  -8   18.92    1.20
   0   6  -8   19.35    1.10
  -1  -6  -8    6.82    0.58
   1  -6   8    7.10    0.47
  -1   6  -8    6.84    0.83
  -1   6  -8    7.22    0.63
   1   6   8    8.34    0.78
   1   6   8    6.21    0.50
  -1   6  -8    7.69    0.77
  -2  -6  -8    0.61    0.26
   2  -6   8    0.57    0.20
  -2   6  -8    0.59    0.34
  -2   6  -8    0.68    0.28
   2   6   8    0.87    0.37
   2   6   8    0.28    0.20
  -2   6  -8    0.43    0.38
  -3  -6  -8   36.56    1.71
   3   6   8   39.10    1.90
  -3   6  -8   37.68    1.95
   3   6   8   34.83    1.66
  -3   6  -8   37.60    1.88
  -3   6  -8   36.12    1.80
  -3   6  -8   40.55    1.80
  -4  -6  -8   72.60    3.05
   4   6   8   65.75    3.02
   4   6   8   80.00    3.28
  -4   6  -8   80.49    3.31
  -4   6  -8   74.12    3.17
  -4   6  -8   81.58    3.39
  -5  -6  -8   10.18    0.84
   5   6   8   10.16    1.01
  -5   6  -8    9.08    1.05
  -5   6  -8    8.21    0.89
  -5   6  -8   10.23    1.04
   5   6   8    7.54    0.81
  -4   7   8    2.38    0.50
   4   7  -8    2.10    0.49
   4   7  -8    2.14    0.48
   3  -7  -8    4.88    0.61
   3   7  -8    3.79    0.48
   3   7  -8    4.03    0.63
   2  -7  -8    0.18    0.22
   2   7  -8   -0.18    0.24
   2   7  -8    0.25    0.43
  -2   7   8   -0.33    0.18
   1  -7  -8    1.06    0.32
   1   7  -8    1.22    0.37
  -1   7   8    2.10    0.44
  -1   7   8    1.12    0.25
   1   7  -8    1.08    0.36
   1   7  -8    1.50    0.52
   0  -7  -8    0.29    0.23
   0   7   8    0.44    0.16
   0   7  -8    0.21    0.27
   0   7  -8    0.03    0.43
   0   7  -8    0.55    0.37
   0   7   8    0.10    0.30
  -1  -7  -8    0.07    0.22
   1   7   8   -0.10    0.29
   1   7   8    0.17    0.16
  -1   7  -8    0.27    0.27
  -1   7  -8    0.35    0.44
  -1   7  -8   -0.02    0.30
  -2  -7  -8    0.87    0.33
  -2   7  -8    0.77    0.33
  -2   7  -8    0.43    0.39
   2   7   8    0.86    0.26
   2   7   8    0.94    0.40
  -2   7  -8    1.15    0.51
  -3  -7  -8    2.16    0.47
  -3   7  -8    3.02    0.53
   3   7   8    2.01    0.53
  -3   7  -8    2.96    0.70
   3   7   8    2.07    0.39
  -3   7  -8    2.05    0.54
  -4  -7  -8    1.53    0.43
  -4   7  -8    0.88    0.39
  -4   7  -8    2.20    0.63
  -4   7  -8    2.31    0.56
   4   7   8    2.49    0.58
   4   7   8    1.25    0.38
   2  -8  -8    3.79    0.57
   2   8  -8    3.37    0.59
  -2   8   8    4.49    0.62
   2   8  -8    3.98    0.79
   1  -8  -8    5.85    0.68
   1   8  -8    4.61    0.78
   1   8  -8    4.72    0.68
   1   8  -8    5.20    0.66
  -1   8   8    5.57    0.73
   0  -8  -8    2.89    0.50
   0   8  -8    3.68    0.61
   0   8  -8    2.54    0.51
   0   8  -8    3.84    0.71
   0   8   8    3.86    0.63
  -1  -8  -8    8.05    0.79
  -1   8  -8    9.68    0.97
  -1   8  -8    8.39    1.03
  -1   8  -8    8.73    0.90
   1   8   8    9.14    0.97
  -2  -8  -8    8.33    0.84
  -2   8  -8    8.73    1.09
  -2   8  -8    7.10    0.91
   2   8   8    6.28    0.84
   2   8   8    7.61    0.61
  -2   8  -8   10.17    0.85
   7   0  -9    0.04    0.35
  -7   0   9    0.25    0.56
  -7   0   9   -0.22    0.42
  -6   0   9    0.02    0.39
   6   0  -9    0.16    0.37
  -6   0   9   -0.22    0.20
  -6   0   9   -0.07    0.49
   5   0  -9    0.04    0.33
  -5   0   9   -0.94    0.53
  -5   0   9    0.05    0.21
  -5   0   9   -0.22    0.36
   4   0  -9   -0.34    0.27
  -4   0   9   -0.12    0.16
  -4   0   9    0.10    0.34
  -4   0   9   -0.27    0.46
   3   0  -9    0.23    0.22
  -3   0   9   -0.23    0.22
  -3   0   9    0.12    0.33
  -2   0   9    0.25    0.18
   2   0  -9   -0.07    0.14
   2   0  -9   -0.01    0.11
  -2   0   9    0.01    0.23
  -1   0   9   -0.04    0.11
   1   0  -9    0.13    0.12
   1   0  -9   -0.07    0.11
   0   0  -9    0.12    0.10
   0   0   9    0.00    0.11
   0   0  -9   -0.08    0.10
   0   0  -9    0.02    0.06
   0   0  -9    0.12    0.05
   1   0   9   -0.08    0.10
  -1   0  -9   -0.11    0.11
  -1   0  -9    0.09    0.09
  -1   0  -9   -0.04    0.10
  -1   0  -9    0.17    0.11
  -1   0  -9    0.08    0.08
  -2   0  -9    0.03    0.11
  -2   0  -9   -0.04    0.09
  -2   0  -9   -0.08    0.10
  -2   0  -9   -0.02    0.13
   2   0   9   -0.11    0.13
  -3   0  -9   -0.12    0.13
   3   0   9   -0.17    0.19
  -3   0  -9    0.06    0.16
  -3   0  -9   -0.04    0.14
  -3   0  -9   -0.11    0.12
  -4   0  -9    0.02    0.15
   4   0   9    0.13    0.29
  -4   0  -9   -0.10    0.20
  -4   0  -9   -0.28    0.13
   5   0   9   -0.17    0.30
  -5   0  -9    0.13    0.21
  -5   0  -9   -0.01    0.17
  -5   0  -9   -0.01    0.21
   6   0   9   -0.62    0.33
  -6   0  -9   -0.19    0.20
  -6   0  -9   -0.25    0.19
  -6   0  -9    0.23    0.23
  -7   0  -9    0.00    0.27
  -7  -1   9   15.07    1.02
  -7  -1   9   15.48    1.26
  -7  -1   9   15.40    1.35
   7  -1  -9   15.59    1.12
   7   1  -9   14.44    1.15
  -7   1   9   15.33    1.37
  -7   1   9   12.19    1.14
  -6  -1   9    3.56    0.67
  -6  -1   9    3.43    0.75
   6  -1  -9    4.91    0.64
  -6  -1   9    4.60    0.58
   6   1  -9    3.76    0.63
  -6   1   9    3.94    0.80
  -6   1   9    4.18    0.67
  -5  -1   9   13.08    1.00
   5  -1  -9   12.00    0.86
  -5  -1   9   12.51    0.78
  -5  -1   9   12.46    1.19
  -5   1   9   12.74    1.14
   5   1  -9   12.46    0.90
  -5   1   9   12.20    0.90
   4  -1  -9    9.47    0.70
  -4  -1   9    9.18    0.97
  -4  -1   9    9.61    0.76
  -4  -1   9    9.47    0.59
  -4   1   9    8.34    0.74
   4   1  -9    9.14    0.72
  -4   1   9    8.55    0.96
   3  -1  -9   63.26    2.50
  -3  -1   9   66.76    2.62
  -3  -1   9   65.87    2.54
   3  -1  -9   65.33    2.42
  -3  -1   9   64.27    2.43
   3   1  -9   63.51    2.26
  -3   1   9   65.23    2.52
  -3   1   9   60.03    2.70
   3   1  -9   66.41    2.26
   3   1  -9   63.53    2.33
   3   1  -9   67.95    2.54
   2  -1  -9    4.69    0.39
  -2  -1   9    4.81    0.30
   2  -1  -9    5.29    0.36
  -2  -1   9    5.07    0.42
  -2  -1   9    4.54    0.42
   2   1  -9    4.99    0.29
   2   1  -9    5.81    0.29
  -2   1   9    5.75    0.59
   2   1  -9    5.63    0.31
   2   1  -9    4.40    0.40
  -2   1   9    4.96    0.40
   1  -1  -9  371.55   12.31
   1  -1  -9  337.92   12.32
  -1  -1   9  362.02   12.28
   1   1  -9  341.22   12.26
  -1   1   9  343.37   12.34
   1   1  -9  340.48   12.39
  -1   1   9  363.67   12.30
   1   1  -9  372.32   12.31
   0  -1  -9    4.81    0.28
   0  -1  -9    4.79    0.36
   0  -1   9    4.92    0.31
   0  -1  -9    4.64    0.32
   0   1  -9    4.36    0.33
   0   1   9    5.34    0.33
   0   1  -9    5.36    0.33
   0   1  -9    4.83    0.37
   1  -1   9    6.95    0.37
  -1  -1  -9    7.10    0.37
  -1  -1  -9    6.73    0.42
  -1  -1  -9    6.37    0.44
  -1   1  -9    6.83    0.44
  -1   1  -9    6.45    0.38
  -1   1  -9    6.58    0.33
  -1   1  -9    6.97    0.44
  -1   1  -9    7.13    0.38
  -1   1  -9    5.47    0.42
   1   1   9    6.36    0.41
  -2  -1  -9   24.73    1.04
  -2  -1  -9   25.01    1.12
  -2  -1  -9   24.59    1.00
   2  -1   9   25.99    1.04
  -2  -1  -9   25.47    1.09
  -2   1  -9   26.02    1.09
  -2   1  -9   25.08    1.12
  -2   1  -9   23.18    1.01
  -2   1  -9   24.95    1.05
  -2   1  -9   24.41    1.10
  -2   1  -9   23.92    1.05
   2   1   9   25.20    1.09
  -3  -1  -9   43.95    1.89
  -3  -1  -9   43.84    1.86
  -3  -1  -9   48.63    1.93
   3  -1   9   50.94    1.89
   3   1   9   51.72    1.96
  -3   1  -9   45.34    1.92
  -3   1  -9   48.55    1.86
  -3   1  -9   44.74    1.86
  -3   1  -9   48.28    1.88
  -3   1  -9   47.71    1.91
  -4  -1  -9  105.94    4.13
   4  -1   9  112.86    4.17
  -4  -1  -9  118.29    4.17
  -4   1  -9  115.43    4.06
  -4   1  -9  108.07    4.17
  -4   1  -9  112.58    4.17
  -4   1  -9  110.53    4.14
   4   1   9  107.39    4.21
  -5  -1  -9    0.08    0.25
   5  -1   9   -0.23    0.32
  -5  -1  -9    0.31    0.20
  -5  -1  -9    0.14    0.23
  -5  -1  -9   -0.08    0.18
  -5   1  -9    0.07    0.20
   5   1   9   -0.30    0.33
  -5   1  -9    0.17    0.21
  -6  -1  -9    3.04    0.52
  -6  -1  -9    2.84    0.51
  -6  -1  -9    2.63    0.40
  -6   1  -9    2.60    0.45
  -6   1  -9    2.35    0.46
  -6   1  -9    3.46    0.48
  -6   1  -9    2.83    0.45
   6   1   9    1.98    0.59
  -7  -1  -9   16.06    1.10
  -7  -1  -9   16.94    1.15
  -7   1  -9   15.75    1.15
  -7   1  -9   20.60    1.22
   7   1   9   14.21    1.26
  -7  -2   9    0.14    0.54
  -7  -2   9   -0.06    0.25
  -7  -2   9   -0.16    0.44
  -7   2   9   -0.06    0.43
  -7   2   9   -0.48    0.48
   7   2  -9   -0.26    0.42
  -7   2   9   -0.20    0.27
  -6  -2   9   19.77    1.32
  -6  -2   9   23.38    1.17
  -6  -2   9   19.83    1.52
   6  -2  -9   18.28    1.15
  -6   2   9   19.11    1.28
  -6   2   9   18.00    1.46
  -6   2   9   19.15    1.10
   6   2  -9   17.12    1.19
  -5  -2   9  122.09    4.53
   5  -2  -9  121.13    4.58
  -5  -2   9  120.45    4.84
  -5  -2   9  122.06    4.70
  -5   2   9  125.71    4.96
  -5   2   9  118.51    4.50
   5   2  -9  118.53    4.62
  -5   2   9  121.17    4.65
  -4  -2   9   25.37    1.31
   4  -2  -9   23.99    1.19
  -4  -2   9   23.71    1.11
  -4  -2   9   22.09    1.34
   4   2  -9   24.29    1.03
  -4   2   9   23.91    1.10
   4   2  -9   22.62    1.20
  -4   2   9   26.12    1.25
  -4   2   9   24.16    1.54
   3  -2  -9    5.04    0.49
  -3  -2   9    5.70    0.57
   3  -2  -9    5.21    0.36
  -3  -2   9    5.64    0.39
  -3  -2   9    5.39    0.56
   3   2  -9    6.19    0.56
   3   2  -9    5.41    0.25
  -3   2   9    5.36    0.39
   3   2  -9    5.45    0.37
   3   2  -9    5.48    0.38
  -3   2   9    5.67    0.77
  -3   2   9    6.43    0.53
  -2  -2   9  159.65    5.47
   2  -2  -9  160.55    5.56
  -2  -2   9  161.53    5.59
   2  -2  -9  158.95    5.58
   2   2  -9  151.25    5.53
   2   2  -9  150.97    5.58
  -2   2   9  154.41    5.46
  -2   2   9  142.42    5.73
  -2   2   9  159.38    5.58
   2   2  -9  157.17    5.46
   2   2  -9  163.04    5.52
  -2   2   9  152.30    5.45
  -1  -2   9   74.21    2.68
   1  -2  -9   72.39    2.69
   1  -2  -9   71.58    2.74
  -1  -2   9   73.02    2.54
   1   2  -9   74.40    2.67
   1   2  -9   75.38    2.69
   1   2  -9   71.99    2.70
   1   2  -9   66.16    2.68
  -1   2   9   76.80    2.71
  -1   2   9   72.94    2.79
   0  -2   9   91.03    3.14
   0  -2  -9   91.48    3.21
   0  -2  -9   87.73    3.16
   0   2  -9   87.82    3.21
   0   2  -9   87.80    3.26
   0   2  -9   85.43    3.15
   0   2   9   88.04    3.18
   0   2  -9   80.98    3.20
   0   2   9   87.85    3.19
   1  -2   9   23.33    0.94
  -1  -2  -9   23.55    1.02
  -1   2  -9   24.25    1.07
  -1   2  -9   22.84    1.08
  -1   2  -9   23.39    0.95
   1   2   9   24.14    1.02
  -1   2  -9   23.88    0.99
  -2  -2  -9    0.07    0.13
  -2  -2  -9   -0.02    0.11
   2  -2   9    0.10    0.10
  -2  -2  -9    0.03    0.08
   2   2   9   -0.10    0.14
  -2   2  -9   -0.08    0.14
  -2   2  -9    0.31    0.19
  -2   2  -9    0.21    0.21
  -2   2  -9    0.07    0.11
  -2   2  -9    0.02    0.10
   3  -2   9   59.59    2.31
  -3  -2  -9   60.20    2.40
  -3  -2  -9   63.13    2.38
  -3   2  -9   57.32    2.42
  -3   2  -9   61.11    2.33
   3   2   9   59.99    2.42
  -3   2  -9   59.11    2.34
  -3   2  -9   66.88    2.43
  -4  -2  -9    9.87    0.66
  -4  -2  -9    9.48    0.69
   4  -2   9    8.99    0.64
  -4   2  -9    8.97    0.67
  -4   2  -9    8.76    0.61
  -4   2  -9    8.79    0.62
  -4   2  -9    7.84    0.63
   4   2   9    9.47    0.74
  -5  -2  -9    0.44    0.25
   5   2   9    0.72    0.41
  -5   2  -9    0.30    0.24
  -5   2  -9    0.00    0.19
  -5   2  -9   -0.19    0.21
  -6  -2  -9    5.02    0.64
  -6   2  -9    5.69    0.70
  -6   2  -9    4.77    0.62
   6   2   9    4.24    0.72
  -6   2  -9    4.03    0.57
  -7  -2  -9    0.45    0.38
   7   2   9   -0.17    0.44
  -7   2  -9    1.29    0.40
  -7   2  -9    0.27    0.34
  -7  -3   9    4.05    0.60
  -7  -3   9    4.75    0.83
  -7  -3   9    4.91    0.97
  -7   3   9    3.58    0.58
  -7   3   9    4.95    0.91
   7   3  -9    4.86    0.77
  -7   3   9    3.56    0.69
  -6  -3   9    0.98    0.33
  -6  -3   9    0.51    0.59
  -6  -3   9    1.16    0.53
  -6   3   9    0.97    0.44
  -6   3   9    1.25    0.54
   6   3  -9    0.96    0.45
  -6   3   9    0.94    0.34
  -5  -3   9   31.53    1.43
  -5  -3   9   33.18    1.65
  -5  -3   9   29.98    1.71
  -5   3   9   29.87    1.43
  -5   3   9   31.66    1.55
  -5   3   9   28.29    1.76
   5   3  -9   28.77    1.53
  -4  -3   9   45.33    2.01
   4  -3  -9   43.06    1.87
  -4  -3   9   43.04    1.81
  -4  -3   9   44.93    2.01
   4   3  -9   45.41    1.82
  -4   3   9   45.28    1.92
   4   3  -9   45.53    1.96
  -4   3   9   44.35    2.19
  -4   3   9   42.99    1.82
  -3  -3   9    1.25    0.36
   3  -3  -9    1.32    0.22
  -3  -3   9    1.11    0.37
   3  -3  -9    1.46    0.30
  -3  -3   9    1.53    0.24
  -3   3   9    1.91    0.34
  -3   3   9    1.46    0.26
  -3   3   9    1.21    0.50
  -3   3   9    1.25    0.16
   3   3  -9    1.40    0.29
   3   3  -9    1.56    0.35
   3   3  -9    1.74    0.28
   2  -3  -9   11.10    0.62
  -2  -3   9   11.59    0.54
  -2  -3   9   11.32    0.68
   2  -3  -9   11.81    0.65
   2   3  -9   12.32    0.66
  -2   3   9   10.51    0.62
  -2   3   9   10.83    0.85
  -2   3   9   10.37    0.56
   2   3  -9   11.91    0.58
  -2   3   9   11.55    0.57
   2   3  -9   12.68    0.70
   2   3  -9   12.35    0.67
  -1  -3   9    0.24    0.08
   1  -3  -9   -0.08    0.09
   1  -3  -9    0.04    0.12
  -1  -3   9   -0.16    0.14
   1   3  -9   -0.08    0.19
   1   3  -9    0.02    0.15
  -1   3   9   -0.09    0.11
   1   3  -9    0.08    0.16
   1   3  -9    0.06    0.13
  -1   3   9    0.01    0.26
   1   3  -9    0.14    0.14
   0  -3  -9    5.19    0.38
   0  -3  -9    5.20    0.38
   0  -3   9    5.16    0.31
   0  -3   9    5.01    0.25
   0   3  -9    4.61    0.39
   0   3  -9    5.53    0.53
   0   3   9    5.08    0.43
   0   3   9    5.25    0.39
   0   3  -9    5.04    0.47
   0   3  -9    5.21    0.44
   0   3  -9    5.09    0.33
  -1  -3  -9    0.11    0.13
   1  -3   9    0.12    0.08
  -1  -3  -9    0.04    0.13
  -1   3  -9    0.09    0.08
  -1   3  -9    0.45    0.22
   1   3   9    0.21    0.16
  -1   3  -9    0.10    0.16
  -1   3  -9    0.09    0.22
  -1   3  -9    0.08    0.22
  -1   3  -9    0.13    0.10
   1   3   9    0.02    0.14
  -1   3  -9    0.25    0.15
  -2  -3  -9    9.50    0.58
  -2  -3  -9    9.74    0.39
   2  -3   9    9.74    0.47
  -2  -3  -9   10.12    0.61
  -2   3  -9    9.18    0.65
  -2   3  -9    9.35    0.61
  -2   3  -9    9.31    0.70
   2   3   9   10.32    0.62
  -2   3  -9    9.37    0.48
  -3  -3  -9   13.07    0.76
  -3  -3  -9   12.15    0.73
   3   3   9   12.15    0.78
  -3   3  -9   13.51    0.80
  -3   3  -9   12.87    0.82
  -3   3  -9   14.02    0.67
  -4  -3  -9    0.39    0.24
  -4  -3  -9    0.40    0.26
   4   3   9    0.68    0.32
  -4   3  -9    0.60    0.20
  -4   3  -9    0.32    0.28
  -4   3  -9    0.82    0.30
  -5  -3  -9    6.36    0.66
  -5  -3  -9    5.59    0.63
   5   3   9    4.22    0.64
  -5   3  -9    5.49    0.53
  -5   3  -9    5.28    0.65
  -5   3  -9    6.35    0.69
  -6  -3  -9   26.85    1.38
  -6   3  -9   23.84    1.39
  -6   3  -9   24.68    1.39
   6   3   9   22.19    1.47
  -6   3  -9   22.47    1.24
  -6   3  -9   26.12    1.38
  -6  -4   9    4.15    0.56
  -6   4   9    4.50    0.79
  -6   4   9    4.17    0.60
  -6   4   9    4.05    0.63
   6   4  -9    4.55    0.67
  -5  -4   9    8.10    0.63
  -5  -4   9    6.74    0.89
  -5  -4   9    7.70    0.81
  -5   4   9    8.24    0.68
  -5   4   9    7.83    0.95
  -5   4   9    6.81    0.73
   5   4  -9    5.69    0.71
  -4  -4   9   41.56    1.91
  -4  -4   9   41.49    1.91
  -4  -4   9   41.99    1.74
  -4   4   9   41.59    1.78
  -4   4   9   40.90    1.82
   4   4  -9   42.40    1.81
   4   4  -9   42.00    1.88
  -4   4   9   42.41    2.07
  -3  -4   9   66.75    2.58
  -3  -4   9   63.60    2.40
  -3  -4   9   60.78    2.52
   3  -4  -9   64.12    2.44
   3   4  -9   63.37    2.52
  -3   4   9   64.46    2.42
   3   4  -9   66.18    2.49
  -3   4   9   59.40    2.68
   3   4  -9   64.88    2.53
  -3   4   9   59.29    2.45
  -3   4   9   64.10    2.45
   3   4  -9   60.74    2.51
  -2  -4   9  107.32    3.87
  -2  -4   9  103.02    3.73
   2  -4  -9  101.49    3.80
   2   4  -9  103.90    3.79
   2   4  -9  109.80    3.85
  -2   4   9  101.38    3.80
   2   4  -9  103.41    3.91
  -2   4   9  101.94    3.81
   2   4  -9  103.16    3.90
   2   4  -9  104.68    3.92
  -2   4   9  104.66    3.99
   1  -4  -9   91.22    3.44
  -1  -4   9   93.64    3.35
   1  -4  -9   95.42    3.50
  -1   4   9   90.14    3.52
  -1   4   9   95.40    3.52
  -1   4   9   99.89    3.47
   1   4  -9   94.60    3.58
   1   4  -9   93.53    3.42
   1   4  -9   97.24    3.58
   1   4  -9   91.80    3.58
   1   4  -9   92.84    3.50
   0  -4  -9   35.07    1.49
   0  -4   9   36.16    1.35
   0  -4  -9   36.83    1.47
   0   4  -9   35.37    1.64
   0   4  -9   37.17    1.63
   0   4  -9   36.45    1.38
   0   4   9   37.83    1.48
   0   4  -9   35.29    1.55
   0   4  -9   36.60    1.58
   0   4   9   34.18    1.42
  -1  -4  -9   20.10    0.92
  -1  -4  -9   17.82    0.91
  -1   4  -9   17.82    1.05
  -1   4  -9   19.24    1.10
  -1   4  -9   19.37    0.76
  -1   4  -9   17.54    0.96
   1   4   9   19.93    0.92
  -1   4  -9   22.35    1.07
  -2  -4  -9    8.67    0.58
  -2  -4  -9    8.03    0.56
  -2   4  -9    8.41    0.39
  -2   4  -9    8.59    0.61
  -2   4  -9    7.97    0.64
  -2   4  -9    7.38    0.59
  -2   4  -9    6.74    0.71
   2   4   9    7.06    0.56
  -2   4  -9    7.77    0.70
  -3  -4  -9   11.35    0.71
  -3  -4  -9   10.38    0.70
  -3   4  -9   11.51    0.85
  -3   4  -9   10.53    0.80
  -3   4  -9   10.62    0.74
   3   4   9    9.78    0.70
  -3   4  -9   11.35    0.54
  -4  -4  -9   28.19    1.36
  -4  -4  -9   27.74    1.38
  -4   4  -9   29.97    1.52
  -4   4  -9   27.27    1.41
   4   4   9   26.41    1.40
  -4   4  -9   28.89    1.20
  -4   4  -9   26.86    1.45
  -5  -4  -9   24.96    1.33
  -5  -4  -9   24.89    1.29
   5   4   9   22.06    1.35
  -5   4  -9   24.37    1.40
  -5   4  -9   22.75    1.36
  -5   4  -9   23.84    1.12
  -5   4  -9   23.11    1.33
  -6  -4  -9    6.21    0.75
  -6  -4  -9    5.76    0.76
  -6   4  -9    5.70    0.72
  -6   4  -9    6.16    0.60
   6   4   9    5.02    0.79
  -6   4  -9    7.69    0.88
  -6   4  -9    7.04    0.80
   6   5  -9    9.31    0.99
  -6   5   9    9.15    0.89
  -6   5   9    8.30    0.85
  -6   5   9    9.81    1.12
  -5   5   9    2.17    0.57
   5   5  -9    1.11    0.34
   5   5  -9    1.02    0.46
  -5   5   9    0.93    0.38
  -5   5   9    2.13    0.42
  -4  -5   9   33.73    1.59
  -4  -5   9   29.11    1.42
  -4   5   9   31.73    1.51
  -4   5   9   31.27    1.50
   4   5  -9   33.91    1.57
   4   5  -9   35.71    1.61
  -4   5   9   31.21    1.69
  -3  -5   9   25.25    1.12
   3  -5  -9   25.46    1.20
  -3   5   9   24.09    1.19
   3   5  -9   26.15    1.29
   3   5  -9   25.21    1.28
   3   5  -9   24.04    1.24
   3   5  -9   27.27    1.27
  -3   5   9   24.85    1.35
  -3   5   9   23.52    1.16
  -2  -5   9    6.92    0.47
   2  -5  -9    8.40    0.60
   2   5  -9    7.60    0.57
   2   5  -9    7.66    0.63
  -2   5   9    8.55    0.59
   2   5  -9    8.24    0.61
   2   5  -9    8.80    0.74
   2   5  -9    8.71    0.67
  -2   5   9    7.48    0.53
  -2   5   9    8.47    0.68
   1  -5  -9   18.92    0.97
  -1  -5   9   19.74    0.84
  -1   5   9   19.50    1.03
   1   5  -9   18.85    1.07
   1   5  -9   18.56    0.87
   1   5  -9   19.17    1.00
  -1   5   9   18.61    0.94
  -1   5   9   19.55    0.91
   1   5  -9   19.21    1.05
   1   5  -9   18.45    1.11
   0  -5   9    5.31    0.35
   0  -5  -9    5.06    0.50
   0   5  -9    4.53    0.54
   0   5  -9    6.01    0.69
   0   5  -9    4.20    0.58
   0   5  -9    4.90    0.32
   0   5   9    4.46    0.40
   0   5  -9    4.74    0.52
   0   5   9    4.80    0.54
  -1  -5  -9    1.26    0.28
   1  -5   9    1.20    0.20
  -1   5  -9    1.80    0.47
  -1   5  -9    2.17    0.50
  -1   5  -9    1.17    0.34
   1   5   9    1.35    0.39
  -1   5  -9    1.42    0.33
   1   5   9    1.33    0.27
  -2  -5  -9    2.70    0.40
  -2  -5  -9    2.71    0.36
  -2   5  -9    2.44    0.39
  -2   5  -9    2.71    0.42
  -2   5  -9    3.44    0.53
  -2   5  -9    2.54    0.52
   2   5   9    2.49    0.37
  -3  -5  -9    0.55    0.26
  -3  -5  -9    0.71    0.27
  -3   5  -9    0.59    0.38
   3   5   9    0.13    0.22
  -3   5  -9    0.44    0.31
  -3   5  -9    0.26    0.24
  -4  -5  -9    3.21    0.49
  -4  -5  -9    3.59    0.52
  -4   5  -9    3.64    0.54
  -4   5  -9    2.85    0.59
  -4   5  -9    3.91    0.59
   4   5   9    2.65    0.50
  -5  -5  -9   17.81    1.11
  -5  -5  -9   18.50    1.34
  -5   5  -9   16.80    1.14
  -5   5  -9   16.27    1.15
   5   5   9   16.72    1.15
  -5   5  -9   19.90    1.29
  -5   6   9    0.62    0.38
  -5   6   9    0.37    0.34
   5   6  -9   -0.16    0.38
  -5   6   9    0.28    0.29
   5   6  -9    0.02    0.28
   4   6  -9    7.93    0.82
   4   6  -9    9.07    0.82
  -4   6   9    8.79    0.70
  -4   6   9   11.55    0.89
  -4   6   9    8.89    0.75
   3  -6  -9    0.11    0.22
   3   6  -9   -0.20    0.26
  -3   6   9    0.30    0.27
   3   6  -9   -0.02    0.22
   3   6  -9    0.06    0.37
  -3   6   9    0.13    0.20
   2  -6  -9    0.72    0.28
   2   6  -9    0.58    0.27
   2   6  -9    0.47    0.40
  -2   6   9    0.77    0.21
   2   6  -9    0.77    0.30
   2   6  -9    0.94    0.36
  -2   6   9    0.69    0.28
   2   6  -9    0.25    0.24
  -2   6   9    0.90    0.32
   1  -6  -9    4.06    0.51
  -1   6   9    3.87    0.50
   1   6  -9    5.27    0.67
   1   6  -9    3.79    0.55
  -1   6   9    3.83    0.39
   1   6  -9    4.08    0.60
   1   6  -9    3.53    0.49
   0  -6  -9   -0.15    0.16
   0   6  -9   -0.19    0.32
   0   6  -9    0.28    0.25
   0   6  -9   -0.18    0.26
   0   6   9    0.05    0.25
   0   6  -9    0.31    0.35
   0   6   9    0.03    0.14
  -1  -6  -9    3.87    0.49
  -1   6  -9    3.91    0.51
  -1   6  -9    3.60    0.64
   1   6   9    4.02    0.42
   1   6   9    3.07    0.51
  -1   6  -9    4.43    0.60
  -2  -6  -9   24.65    1.27
  -2   6  -9   26.78    1.37
  -2   6  -9   26.43    1.54
   2   6   9   27.42    1.46
   2   6   9   24.30    1.22
  -2   6  -9   25.50    1.42
  -3  -6  -9    6.87    0.70
   3   6   9    7.14    0.66
   3   6   9    9.83    0.93
  -3   6  -9    8.72    0.77
  -3   6  -9    9.36    0.94
  -3   6  -9   10.09    1.05
  -3   6  -9    7.96    0.70
  -4  -6  -9    5.89    0.69
  -4   6  -9    6.14    0.73
  -4   6  -9    5.90    0.84
   4   6   9    5.80    0.65
   4   6   9    5.89    0.79
  -4   6  -9    5.48    0.76
  -5  -6  -9   -0.16    0.29
  -5   6  -9    0.12    0.30
  -5   6  -9    0.64    0.49
  -5   6  -9   -0.21    0.36
   5   6   9   -0.38    0.37
   5   6   9   -0.46    0.29
   4  -7  -9   16.35    1.08
  -4   7   9   17.60    1.27
   4   7  -9   17.78    1.17
   4   7  -9   15.96    1.04
   3  -7  -9    3.42    0.52
   3   7  -9    3.44    0.59
   3   7  -9    3.07    0.45
   3   7  -9    3.13    0.64
   2  -7  -9    0.65    0.30
   2   7  -9    0.00    0.27
   2   7  -9    0.42    0.54
   2   7  -9    0.97    0.47
  -2   7   9    0.41    0.28
   1  -7  -9    0.48    0.26
  -1   7   9    0.31    0.16
   1   7  -9    0.10    0.41
   1   7  -9   -0.39    0.36
  -1   7   9    0.38    0.29
   1   7  -9   -0.06    0.23
   1   7  -9    0.15    0.29
   0  -7  -9    1.40    0.35
   0   7  -9    2.37    0.55
   0   7   9    1.45    0.26
   0   7  -9    2.02    0.48
   0   7  -9    2.12    0.44
   0   7   9    1.47    0.40
  -1  -7  -9    0.39    0.27
  -1   7  -9    0.14    0.36
   1   7   9    0.35    0.33
  -1   7  -9    0.25    0.39
   1   7   9    0.40    0.20
  -1   7  -9    0.11    0.24
  -2  -7  -9   12.85    0.86
  -2   7  -9   12.08    0.89
  -2   7  -9   11.61    1.08
  -2   7  -9   11.38    1.00
   2   7   9   10.16    0.73
   2   7   9   12.39    0.99
  -3  -7  -9   24.10    1.33
   3   7   9   22.88    1.26
   3   7   9   25.13    1.51
  -3   7  -9   26.96    1.65
  -3   7  -9   25.11    1.52
  -3   7  -9   25.81    1.41
  -4  -7  -9   19.26    1.24
  -4   7  -9   24.23    1.43
   4   7   9   21.74    1.27
  -4   7  -9   26.33    1.58
  -4   7  -9   22.15    1.53
   4   7   9   23.13    1.48
   2  -8  -9    0.09    0.25
   2   8  -9   -0.06    0.30
  -2   8   9   -0.06    0.26
   2   8  -9   -0.82    0.42
   1  -8  -9    4.93    0.61
   1   8  -9    5.43    0.88
  -1   8   9    4.54    0.65
   1   8  -9    5.98    0.76
   1   8  -9    4.41    0.62
   0  -8  -9   10.70    0.96
   0   8   9    8.85    0.92
   0   8  -9    9.30    0.97
   0   8  -9    9.50    0.94
   0   8  -9    8.63    1.07
  -1  -8  -9    6.28    0.72
  -1   8  -9    5.73    0.73
  -1   8  -9    5.09    0.87
  -1   8  -9    4.89    0.74
   1   8   9    5.32    0.76
  -2  -8  -9    1.40    0.40
  -2   8  -9    1.06    0.55
   2   8   9    0.77    0.41
  -2   8  -9    0.94    0.38
  -2   8  -9   -0.15    0.43
   2   8   9    1.27    0.31
  -7   0  10    7.57    0.96
   7   0 -10    8.22    0.90
  -7   0  10    9.17    1.18
   6   0 -10    6.61    0.74
  -6   0  10    6.11    0.82
  -6   0  10    7.36    1.02
   5   0 -10  173.59    6.51
  -5   0  10  182.54    6.86
  -5   0  10  175.10    6.58
  -4   0  10  274.27    9.91
  -4   0  10  269.92    9.69
   4   0 -10  268.72    9.65
   3   0 -10    3.95    0.45
  -3   0  10    4.26    0.61
  -3   0  10    4.00    0.46
  -2   0  10   62.44    2.35
   2   0 -10   60.56    2.35
   2   0 -10   63.03    2.35
  -2   0  10   59.33    2.41
   1   0 -10   54.94    2.21
   1   0 -10   59.62    2.19
  -1   0  10   58.61    2.18
   0   0  10   32.59    1.24
   0   0 -10   28.73    1.28
   0   0 -10   30.54    1.24
   0   0 -10   31.14    1.10
   0   0 -10   30.74    1.13
  -1   0 -10    0.01    0.11
  -1   0 -10    0.16    0.13
  -1   0 -10   -0.03    0.08
  -1   0 -10    0.05    0.11
   1   0  10    0.09    0.12
  -1   0 -10   -0.12    0.08
   2   0  10   52.21    1.94
  -2   0 -10   49.19    1.97
  -2   0 -10   48.62    1.94
  -2   0 -10   50.09    1.92
  -2   0 -10   49.04    1.88
  -3   0 -10    0.59    0.24
   3   0  10    0.83    0.25
  -3   0 -10    0.47    0.20
  -3   0 -10    0.58    0.19
  -3   0 -10    0.33    0.18
  -3   0 -10    0.44    0.20
  -4   0 -10    3.33    0.37
   4   0  10    3.55    0.49
  -4   0 -10    3.80    0.45
  -4   0 -10    2.95    0.41
  -4   0 -10    2.85    0.39
  -5   0 -10    7.51    0.62
  -5   0 -10    7.54    0.60
   5   0  10    4.77    0.62
   6   0  10   19.99    1.38
  -6   0 -10   24.04    1.23
  -6   0 -10   26.43    1.33
  -7   0 -10   37.99    1.91
   7  -1 -10    0.60    0.42
  -7  -1  10    0.57    0.58
  -7  -1  10    0.47    0.28
  -7  -1  10   -0.10    0.46
  -7   1  10    0.09    0.58
  -7   1  10   -0.08    0.43
   7   1 -10    0.03    0.41
  -6  -1  10    2.58    0.59
  -6  -1  10    1.53    0.66
   6  -1 -10    1.70    0.47
  -6  -1  10    1.74    0.38
   6   1 -10    2.52    0.54
  -6   1  10    1.35    0.64
  -6   1  10    1.92    0.52
  -5  -1  10    1.37    0.32
   5  -1 -10    1.04    0.38
  -5  -1  10    1.23    0.66
  -5  -1  10    0.86    0.43
  -5   1  10    1.43    0.61
   5   1 -10    1.63    0.40
  -5   1  10    1.53    0.44
  -4  -1  10   31.83    1.40
   4  -1 -10   33.64    1.51
  -4  -1  10   32.35    1.68
  -4  -1  10   32.48    1.55
   4   1 -10   32.21    1.52
  -4   1  10   32.88    1.53
  -4   1  10   31.13    1.81
  -3  -1  10   29.87    1.26
  -3  -1  10   31.59    1.47
   3  -1 -10   30.92    1.28
   3  -1 -10   30.73    1.37
  -3  -1  10   32.05    1.39
  -3   1  10   30.61    1.37
   3   1 -10   31.39    1.38
  -3   1  10   31.13    1.59
   3   1 -10   30.98    1.13
   3   1 -10   29.65    1.17
   3   1 -10   31.06    1.13
   2  -1 -10   23.21    1.03
  -2  -1  10   23.07    1.03
   2  -1 -10   23.69    1.02
  -2   1  10   22.10    0.89
   2   1 -10   23.11    1.04
   2   1 -10   22.24    0.91
   2   1 -10   24.99    0.94
  -2   1  10   22.53    1.03
  -2   1  10   24.02    1.18
   1  -1 -10  252.39    9.31
  -1  -1  10  275.86    9.27
   1  -1 -10  258.41    9.28
  -1   1  10  267.45    9.33
   1   1 -10  270.86    9.28
  -1   1  10  278.80    9.29
   1   1 -10  253.01    9.23
   0  -1 -10  124.94    4.52
   0  -1 -10  122.59    4.43
   0  -1  10  131.58    4.48
   0  -1 -10  123.04    4.57
   0   1 -10  128.94    4.52
   0   1  10  125.84    4.51
   0   1 -10  127.74    4.50
   0   1 -10  124.43    4.58
  -1  -1 -10    0.89    0.15
  -1  -1 -10    1.02    0.20
  -1  -1 -10    0.86    0.21
   1  -1  10    0.76    0.14
  -1   1 -10    0.60    0.17
  -1   1 -10    0.84    0.13
  -1   1 -10    0.49    0.14
  -1   1 -10    1.08    0.16
  -1   1 -10    0.73    0.20
   1   1  10    1.19    0.21
  -1   1 -10    0.91    0.23
  -2  -1 -10    5.71    0.46
  -2  -1 -10    6.05    0.40
   2  -1  10    6.27    0.41
  -2  -1 -10    6.46    0.46
  -2  -1 -10    6.54    0.39
  -2   1 -10    5.73    0.45
   2   1  10    6.72    0.48
  -2   1 -10    7.12    0.44
  -2   1 -10    7.04    0.43
  -2   1 -10    6.54    0.45
  -2   1 -10    6.32    0.39
  -2   1 -10    6.69    0.50
  -3  -1 -10   16.11    0.84
  -3  -1 -10   14.96    0.79
  -3  -1 -10   15.26    0.82
   3  -1  10   16.30    0.82
  -3   1 -10   16.02    0.82
  -3   1 -10   14.41    0.76
  -3   1 -10   15.59    0.87
  -3   1 -10   14.23    0.82
  -3   1 -10   15.25    0.77
   3   1  10   16.58    0.86
  -3   1 -10   14.76    0.79
  -4  -1 -10   17.78    0.94
   4  -1  10   17.41    0.97
  -4  -1 -10   19.36    1.00
  -4  -1 -10   16.40    0.92
  -4   1 -10   19.72    0.99
   4   1  10   17.87    1.04
  -4   1 -10   17.91    0.97
  -4   1 -10   16.23    0.90
  -4   1 -10   17.24    0.85
  -4   1 -10   16.13    0.92
  -5  -1 -10   20.21    1.04
  -5  -1 -10   22.03    1.11
   5  -1  10   19.51    1.14
  -5  -1 -10   19.01    1.02
  -5   1 -10   21.15    1.10
  -5   1 -10   19.19    1.07
   5   1  10   19.20    1.20
  -5   1 -10   17.17    1.06
  -5   1 -10   18.99    1.06
  -6  -1 -10    0.85    0.36
  -6  -1 -10    1.05    0.30
   6   1  10   -0.13    0.39
  -6   1 -10    0.44    0.33
  -6   1 -10    0.56    0.30
  -6   1 -10    0.35    0.29
  -7  -1 -10    1.74    0.48
   7   1  10   -0.27    0.47
  -7   1 -10    1.79    0.47
  -7   1 -10    1.29    0.44
  -7  -2  10   13.56    0.97
  -7  -2  10   12.04    1.20
  -7  -2  10   12.97    1.31
  -7   2  10   13.62    1.17
  -7   2  10   13.91    0.96
  -7   2  10   14.26    1.36
   7   2 -10   13.92    1.10
  -6  -2  10   11.74    1.01
  -6  -2  10   12.06    0.81
   6  -2 -10   10.76    0.86
  -6  -2  10   10.61    1.20
   6   2 -10   11.41    0.96
  -6   2  10   10.02    1.19
  -6   2  10   12.15    1.00
  -6   2  10   11.11    0.81
  -5  -2  10   55.16    2.27
  -5  -2  10   54.48    2.46
   5  -2 -10   54.96    2.34
  -5  -2  10   56.47    2.62
  -5   2  10   55.61    2.25
   5   2 -10   55.14    2.39
  -5   2  10   54.95    2.40
  -5   2  10   55.47    2.70
  -4  -2  10   15.45    0.81
   4  -2 -10   15.61    0.90
  -4  -2  10   14.79    1.02
  -4  -2  10   16.19    1.02
   4   2 -10   14.47    0.90
  -4   2  10   14.22    1.17
  -4   2  10   14.81    0.93
  -4   2  10   14.83    0.79
   4   2 -10   15.55    0.73
  -3  -2  10    0.80    0.34
  -3  -2  10    1.08    0.21
   3  -2 -10    1.06    0.20
   3  -2 -10    0.99    0.29
  -3  -2  10    0.87    0.32
   3   2 -10    1.27    0.22
  -3   2  10    1.31    0.32
  -3   2  10    1.49    0.55
   3   2 -10    0.94    0.13
   3   2 -10    0.62    0.28
  -3   2  10    1.10    0.20
   3   2 -10    0.89    0.18
  -2  -2  10   28.47    1.07
   2  -2 -10   28.23    1.20
   2  -2 -10   28.41    1.18
  -2  -2  10   29.88    1.22
   2   2 -10   25.87    1.19
   2   2 -10   25.85    1.13
  -2   2  10   26.42    1.39
   2   2 -10   26.69    1.13
  -2   2  10   26.56    1.05
  -2   2  10   26.71    1.18
   2   2 -10   28.50    1.09
  -1  -2  10   14.03    0.68
   1  -2 -10   14.15    0.66
   1  -2 -10   14.22    0.74
   1  -2 -10   13.91    0.69
   1   2 -10   13.93    0.67
  -1   2  10   14.18    0.79
   1   2 -10   14.01    0.69
  -1   2  10   14.55    0.70
   1   2 -10   14.80    0.70
   0  -2 -10    6.20    0.46
   0  -2 -10    6.58    0.41
   0  -2  10    7.04    0.37
   0  -2 -10    5.84    0.37
   0   2 -10    5.55    0.37
   0   2 -10    5.90    0.42
   0   2 -10    5.85    0.44
   0   2  10    5.81    0.41
   0   2 -10    6.74    0.43
   0   2  10    6.29    0.40
   1  -2  10    0.69    0.14
  -1  -2 -10    0.92    0.20
  -1  -2 -10    0.33    0.14
  -1   2 -10    0.40    0.17
  -1   2 -10    0.20    0.20
  -1   2 -10    0.70    0.14
  -1   2 -10    0.33    0.14
   1   2  10    0.35    0.17
  -2  -2 -10    2.13    0.29
   2  -2  10    2.18    0.24
  -2  -2 -10    2.67    0.22
  -2  -2 -10    1.92    0.28
   2   2  10    1.62    0.28
  -2   2 -10    2.30    0.30
  -2   2 -10    2.48    0.34
  -2   2 -10    2.66    0.27
  -2   2 -10    3.11    0.44
  -2   2 -10    2.28    0.26
   3  -2  10    3.23    0.34
  -3  -2 -10    3.79    0.45
  -3  -2 -10    3.79    0.42
  -3   2 -10    3.88    0.45
  -3   2 -10    3.16    0.44
  -3   2 -10    4.15    0.37
   3   2  10    3.65    0.47
  -3   2 -10    3.55    0.37
  -4  -2 -10   16.03    0.91
  -4  -2 -10   15.85    0.94
  -4   2 -10   16.69    0.90
  -4   2 -10   17.78    0.97
  -4   2 -10   17.92    1.00
   4   2  10   16.56    1.00
  -4   2 -10   17.40    0.90
  -5  -2 -10   -0.12    0.21
  -5  -2 -10    0.38    0.28
   5   2  10   -0.46    0.27
  -5   2 -10   -0.04    0.24
  -5   2 -10    0.04    0.19
  -5   2 -10    0.16    0.23
  -5   2 -10    0.14    0.25
  -6  -2 -10    1.55    0.42
  -6   2 -10    2.33    0.49
  -6   2 -10    1.96    0.41
  -6   2 -10    1.08    0.34
   6   2  10    0.21    0.45
  -6   2 -10    1.59    0.42
  -7  -2 -10   17.07    1.14
   7   2  10   11.37    1.20
  -7   2 -10   17.56    1.14
  -7   2 -10   13.53    1.01
  -7   2 -10   15.20    1.29
  -7   2 -10   15.67    1.12
  -7  -3  10    7.00    1.05
  -7  -3  10    8.18    0.82
  -7  -3  10    4.28    0.81
   7   3 -10    6.37    0.87
  -7   3  10    7.14    1.08
  -7   3  10    4.65    0.76
  -7   3  10    7.46    0.80
  -6  -3  10    0.00    0.23
  -6  -3  10   -0.17    0.57
  -6  -3  10   -0.36    0.40
  -6   3  10    0.34    0.28
   6   3 -10    0.58    0.42
  -6   3  10    0.82    0.58
  -6   3  10   -0.03    0.39
  -5  -3  10   29.04    1.68
  -5  -3  10   30.86    1.39
  -5  -3  10   29.38    1.59
  -5   3  10   29.69    1.78
  -5   3  10   27.67    1.37
  -5   3  10   29.61    1.52
   5   3 -10   28.85    1.50
   4  -3 -10   68.36    2.73
  -4  -3  10   68.01    2.66
  -4  -3  10   70.41    2.86
  -4  -3  10   71.57    2.87
   4   3 -10   71.53    2.67
  -4   3  10   66.62    2.66
  -4   3  10   67.32    3.06
  -4   3  10   68.06    2.76
   4   3 -10   69.92    2.80
   3  -3 -10    2.27    0.35
  -3  -3  10    1.35    0.36
  -3  -3  10    1.67    0.25
  -3  -3  10    1.84    0.41
   3  -3 -10    2.30    0.30
   3   3 -10    2.10    0.38
  -3   3  10    1.59    0.27
   3   3 -10    2.10    0.32
  -3   3  10    2.49    0.38
   3   3 -10    2.21    0.31
  -3   3  10    2.02    0.56
  -2  -3  10   10.50    0.51
   2  -3 -10   11.15    0.65
  -2  -3  10   11.25    0.68
   2  -3 -10   10.52    0.61
   2   3 -10   10.09    0.61
  -2   3  10   10.49    0.54
  -2   3  10   11.26    0.63
  -2   3  10    9.97    0.55
   2   3 -10   11.13    0.66
  -2   3  10    9.76    0.86
   2   3 -10   11.58    0.67
   2   3 -10   10.92    0.56
  -1  -3  10  212.11    7.47
  -1  -3  10  215.37    7.60
   1  -3 -10  218.56    7.64
   1  -3 -10  219.26    7.64
   1   3 -10  220.06    7.74
   1   3 -10  217.21    7.61
   1   3 -10  221.72    7.71
  -1   3  10  202.83    7.74
   1   3 -10  217.81    7.65
  -1   3  10  217.80    7.64
   1   3 -10  218.96    7.69
   0  -3  10  132.28    4.73
   0  -3  10  137.12    4.64
   0  -3 -10  140.76    4.84
   0  -3 -10  137.69    4.81
   0   3  10  127.47    4.81
   0   3 -10  129.68    4.86
   0   3 -10  123.58    4.89
   0   3 -10  131.06    4.75
   0   3 -10  136.30    4.93
   0   3  10  137.30    4.82
   0   3 -10  140.96    4.89
  -1  -3 -10   49.36    1.94
   1  -3  10   48.84    1.81
  -1  -3 -10   46.20    1.90
   1   3  10   48.79    1.93
   1   3  10   48.95    1.81
  -1   3 -10   50.02    1.93
  -1   3 -10   52.57    2.08
  -1   3 -10   49.78    1.83
  -1   3 -10   45.51    1.97
  -1   3 -10   51.24    2.02
  -2  -3 -10   10.19    0.63
   2  -3  10   11.11    0.57
  -2  -3 -10   10.90    0.46
  -2  -3 -10   11.87    0.66
  -2   3 -10   11.64    0.67
   2   3  10   11.14    0.68
  -2   3 -10   11.60    0.73
  -2   3 -10   10.83    0.54
  -2   3 -10    9.90    0.77
  -3  -3 -10   16.68    0.87
  -3  -3 -10   15.86    0.89
  -3   3 -10   15.83    0.94
  -3   3 -10   15.39    0.90
   3   3  10   16.52    0.93
  -3   3 -10   16.43    0.77
  -4  -3 -10   48.75    1.99
  -4  -3 -10   46.82    2.01
   4   3  10   45.30    2.03
  -4   3 -10   45.47    2.00
  -4   3 -10   47.38    1.88
  -4   3 -10   44.30    2.03
  -5  -3 -10   29.18    1.38
  -5  -3 -10   27.41    1.39
  -5   3 -10   23.78    1.36
  -5   3 -10   26.70    1.40
   5   3  10   24.38    1.41
  -5   3 -10   26.18    1.26
  -6  -3 -10    1.96    0.49
  -6  -3 -10    3.71    0.59
  -6   3 -10    2.71    0.51
   6   3  10    2.59    0.63
  -6   3 -10    3.31    0.48
  -6   3 -10    2.99    0.55
  -6  -4  10    9.53    0.76
  -6   4  10    9.72    0.80
   6   4 -10    8.31    0.87
  -6   4  10   10.31    1.18
  -6   4  10    9.57    0.95
  -5  -4  10    4.19    0.76
  -5  -4  10    3.68    0.48
  -5   4  10    4.12    0.73
   5   4 -10    4.76    0.64
  -5   4  10    3.30    0.54
  -5   4  10    3.61    0.50
  -4  -4  10    3.50    0.42
  -4  -4  10    4.50    0.66
  -4  -4  10    4.88    0.64
   4   4 -10    4.50    0.58
  -4   4  10    4.05    0.47
   4   4 -10    4.63    0.49
  -4   4  10    3.65    0.65
  -4   4  10    4.45    0.52
   3  -4 -10    6.96    0.51
  -3  -4  10    6.61    0.69
  -3  -4  10    6.71    0.47
  -3   4  10    6.81    0.51
   3   4 -10    7.08    0.57
   3   4 -10    8.34    0.67
   3   4 -10    6.07    0.54
   3   4 -10    6.32    0.58
  -3   4  10    6.59    0.55
  -3   4  10    8.25    0.86
   2  -4 -10    1.77    0.34
  -2  -4  10    1.49    0.21
   2  -4 -10    1.66    0.27
   2   4 -10    1.14    0.25
  -2   4  10    1.35    0.41
  -2   4  10    0.87    0.23
  -2   4  10    1.24    0.24
   2   4 -10    1.03    0.32
   2   4 -10    1.36    0.29
   2   4 -10    1.53    0.31
   2   4 -10    1.40    0.37
  -1  -4  10    0.55    0.13
   1  -4 -10    0.64    0.18
   1  -4 -10    0.52    0.19
   1   4 -10    0.49    0.21
  -1   4  10    0.88    0.31
   1   4 -10    0.40    0.32
   1   4 -10    0.85    0.30
   1   4 -10    0.44    0.22
   1   4 -10    0.37    0.20
  -1   4  10    0.80    0.21
  -1   4  10    0.43    0.22
   0  -4  10    0.19    0.10
   0  -4 -10    0.30    0.16
   0  -4 -10    0.08    0.16
   0   4 -10    0.22    0.23
   0   4 -10    0.10    0.26
   0   4 -10    0.13    0.14
   0   4  10    0.24    0.20
   0   4 -10    0.23    0.19
   0   4  10    0.17    0.15
   0   4 -10   -0.35    0.24
  -1  -4 -10   10.38    0.64
  -1  -4 -10   11.78    0.66
  -1   4 -10   10.76    0.78
  -1   4 -10   11.01    0.83
  -1   4 -10   10.45    0.73
  -1   4 -10   10.99    0.50
   1   4  10   10.18    0.64
  -1   4 -10   10.58    0.69
  -2  -4 -10    0.81    0.25
  -2  -4 -10    0.78    0.24
  -2   4 -10    1.17    0.38
  -2   4 -10    0.39    0.31
  -2   4 -10    0.69    0.13
  -2   4 -10    1.09    0.28
   2   4  10    0.75    0.25
  -2   4 -10    0.52    0.27
  -2   4 -10    0.76    0.24
  -3  -4 -10    9.43    0.65
  -3  -4 -10    9.74    0.67
   3   4  10    7.71    0.66
  -3   4 -10    7.35    0.65
  -3   4 -10    9.29    0.49
  -3   4 -10    9.58    0.81
  -3   4 -10    9.73    0.76
  -4  -4 -10    2.43    0.43
  -4  -4 -10    2.12    0.41
  -4   4 -10    3.08    0.58
  -4   4 -10    2.35    0.44
  -4   4 -10    2.28    0.45
  -4   4 -10    2.62    0.32
   4   4  10    1.98    0.43
  -5  -4 -10    1.85    0.43
  -5  -4 -10    2.86    0.48
  -5   4 -10    2.48    0.35
  -5   4 -10    2.27    0.51
  -5   4 -10    2.24    0.50
  -5   4 -10    1.92    0.43
   5   4  10    1.22    0.44
  -6  -4 -10    0.15    0.34
  -6  -4 -10    0.50    0.34
  -6   4 -10    0.58    0.36
  -6   4 -10    0.40    0.35
  -6   4 -10    0.05    0.22
  -6   4 -10    1.02    0.46
   6   4  10   -0.13    0.39
  -6   5  10    7.60    0.84
  -6   5  10    8.56    1.08
   6   5 -10    9.14    0.95
  -5   5  10    1.82    0.45
  -5   5  10    2.54    0.44
   5   5 -10    1.62    0.47
  -5   5  10    2.30    0.58
  -4  -5  10    3.23    0.55
   4   5 -10    3.48    0.50
  -4   5  10    4.62    0.53
  -4   5  10    3.21    0.60
   4   5 -10    3.95    0.58
  -4   5  10    3.40    0.47
   3  -5 -10   -0.02    0.19
   3   5 -10   -0.03    0.20
  -3   5  10    0.18    0.30
   3   5 -10    0.31    0.23
   3   5 -10   -0.25    0.30
  -3   5  10    0.01    0.21
   3   5 -10    0.44    0.30
   2  -5 -10    4.94    0.51
  -2   5  10    5.87    0.50
  -2   5  10    4.96    0.45
   2   5 -10    5.69    0.62
   2   5 -10    4.80    0.61
   2   5 -10    5.30    0.57
  -2   5  10    5.13    0.58
   2   5 -10    4.60    0.47
   2   5 -10    5.42    0.51
   1  -5 -10   21.24    1.07
   1   5 -10   21.13    1.20
  -1   5  10   22.04    1.01
   1   5 -10   21.85    1.15
  -1   5  10   21.45    1.05
  -1   5  10   21.42    1.12
   1   5 -10   22.24    0.98
   1   5 -10   23.07    1.20
   1   5 -10   21.10    1.09
   0  -5 -10   34.07    1.49
   0   5 -10   34.87    1.29
   0   5 -10   32.51    1.56
   0   5 -10   33.42    1.66
   0   5 -10   33.67    1.56
   0   5 -10   32.95    1.63
   0   5  10   34.73    1.44
   0   5  10   32.65    1.56
   1  -5  10   20.78    0.92
  -1  -5 -10   21.49    1.05
   1   5  10   20.61    1.01
  -1   5 -10   21.55    1.24
  -1   5 -10   20.14    1.15
  -1   5 -10   19.47    1.09
  -1   5 -10   22.17    1.25
  -2  -5 -10    2.65    0.40
  -2  -5 -10    2.58    0.39
  -2   5 -10    3.73    0.63
  -2   5 -10    2.92    0.46
  -2   5 -10    2.63    0.42
  -2   5 -10    2.47    0.45
   2   5  10    2.66    0.38
  -3  -5 -10   34.50    1.53
  -3  -5 -10   32.52    1.52
  -3   5 -10   30.39    1.56
   3   5  10   31.14    1.52
  -3   5 -10   34.25    1.75
  -3   5 -10   33.44    1.67
  -4  -5 -10   27.12    1.36
  -4  -5 -10   26.47    1.36
  -4   5 -10   25.88    1.41
   4   5  10   24.46    1.37
  -4   5 -10   28.44    1.58
  -4   5 -10   27.38    1.51
  -5  -5 -10   10.42    0.83
  -5  -5 -10    9.75    1.09
  -5   5 -10   10.69    0.88
   5   5  10    8.45    0.88
  -5   5 -10   10.43    1.08
  -5   5 -10   10.15    1.03
  -5   6  10   33.24    1.67
   5   6 -10   36.02    1.75
   5   6 -10   34.92    1.74
  -5   6  10   32.55    1.87
  -4   6  10    8.76    0.72
  -4   6  10    9.26    0.85
   4   6 -10    9.31    0.83
   4   6 -10   10.44    0.81
   3  -6 -10   39.47    1.80
   3   6 -10   40.68    1.74
   3   6 -10   36.83    1.83
  -3   6  10   38.86    1.68
   3   6 -10   41.88    1.90
  -3   6  10   37.42    1.83
   3   6 -10   40.44    1.83
   2  -6 -10   15.97    0.96
   2   6 -10   17.63    0.89
   2   6 -10   17.03    0.94
   2   6 -10   16.39    1.04
   2   6 -10   15.98    1.04
   2   6 -10   18.01    1.11
  -2   6  10   17.35    0.87
  -2   6  10   17.70    0.97
   1  -6 -10    0.06    0.20
  -1   6  10    0.46    0.17
  -1   6  10    0.21    0.25
   1   6 -10    0.15    0.23
   1   6 -10    0.24    0.27
   1   6 -10    0.27    0.35
   1   6 -10    0.08    0.31
   0  -6 -10    0.28    0.23
   0   6 -10    0.27    0.35
   0   6 -10    0.42    0.26
   0   6 -10    0.23    0.38
   0   6 -10    0.21    0.29
   0   6  10   -0.04    0.25
  -1  -6 -10    0.02    0.21
   1   6  10   -0.02    0.16
  -1   6 -10   -0.07    0.21
  -1   6 -10    0.07    0.31
  -1   6 -10   -0.07    0.30
   1   6  10    0.19    0.30
  -2  -6 -10    0.67    0.28
  -2   6 -10    0.45    0.32
  -2   6 -10    0.20    0.37
  -2   6 -10    0.12    0.24
   2   6  10    0.54    0.23
   2   6  10    0.03    0.31
  -3  -6 -10    1.49    0.37
  -3   6 -10    2.73    0.59
   3   6  10    1.18    0.44
  -3   6 -10    1.58    0.39
  -3   6 -10    1.26    0.37
   3   6  10    1.39    0.34
  -3   6 -10    1.17    0.41
  -4  -6 -10    6.13    0.69
   4   6  10    8.84    0.96
   4   6  10    4.67    0.60
  -4   6 -10    7.04    0.95
  -4   6 -10    6.17    0.76
  -4   6 -10    6.72    0.85
   4  -7 -10    2.70    0.52
   4   7 -10    2.67    0.52
   4   7 -10    3.11    0.58
   3  -7 -10   10.63    0.82
   3   7 -10    8.57    0.94
   3   7 -10   10.62    0.89
   3   7 -10   11.19    0.80
   2  -7 -10    3.51    0.54
   2   7 -10    3.90    0.65
   2   7 -10    4.83    0.72
   2   7 -10    5.13    0.69
  -2   7  10    5.39    0.58
  -2   7  10    4.27    0.57
   1  -7 -10    3.52    0.51
   1   7 -10    3.94    0.56
   1   7 -10    4.24    0.68
  -1   7  10    5.54    0.64
   1   7 -10    3.94    0.69
  -1   7  10    3.87    0.40
   1   7 -10    4.27    0.61
   0  -7 -10   -0.07    0.21
   0   7 -10   -0.21    0.30
   0   7 -10    0.15    0.41
   0   7  10    0.10    0.16
   0   7  10    0.16    0.30
   0   7 -10    0.36    0.29
  -1  -7 -10    3.47    0.51
   1   7  10    3.30    0.59
  -1   7 -10    3.29    0.59
   1   7  10    3.65    0.43
  -1   7 -10    4.90    0.65
  -1   7 -10    4.51    0.76
  -2  -7 -10   -0.04    0.25
   2   7  10    0.19    0.20
  -2   7 -10   -0.24    0.33
   2   7  10   -0.47    0.27
  -2   7 -10    0.02    0.33
  -2   7 -10    0.32    0.27
  -3  -7 -10    2.18    0.46
  -3   7 -10    1.90    0.58
   3   7  10    2.30    0.53
  -3   7 -10    1.87    0.43
  -3   7 -10    2.13    0.57
   3   7  10    1.49    0.36
   2  -8 -10    1.02    0.35
   2   8 -10    0.52    0.48
   2   8 -10    0.64    0.37
   1  -8 -10    0.43    0.28
   1   8 -10    0.25    0.34
   1   8 -10    0.59    0.52
   1   8 -10    0.38    0.33
  -1   8  10    0.24    0.33
   0  -8 -10    0.72    0.32
   0   8 -10    0.59    0.39
   0   8 -10    1.26    0.56
   0   8 -10    0.58    0.33
   0   8  10    0.78    0.39
  -1  -8 -10    0.89    0.36
  -1   8 -10    2.33    0.65
   1   8  10    1.47    0.30
  -1   8 -10    1.87    0.46
  -1   8 -10    0.69    0.41
   1   8  10    0.84    0.44
   7   0 -11   -0.07    0.41
  -7   0  11    0.24    0.62
  -7   0  11   -0.61    0.43
  -6   0  11    0.40    0.63
  -6   0  11   -0.28    0.41
   6   0 -11    0.28    0.35
  -5   0  11    0.45    0.62
   5   0 -11    0.01    0.31
  -5   0  11   -0.11    0.35
  -4   0  11    0.14    0.30
  -4   0  11    0.42    0.57
   4   0 -11    0.05    0.28
  -3   0  11    0.04    0.22
  -3   0  11    0.48    0.40
   3   0 -11   -0.26    0.18
   2   0 -11    0.03    0.16
  -2   0  11   -0.08    0.17
  -2   0  11   -0.24    0.18
   2   0 -11    0.14    0.12
  -1   0  11    0.18    0.14
   1   0 -11   -0.05    0.11
   1   0 -11    0.02    0.11
   0   0 -11    0.14    0.08
   0   0 -11   -0.10    0.10
   0   0  11    0.09    0.12
   0   0 -11   -0.04    0.11
  -1   0 -11   -0.08    0.12
  -1   0 -11   -0.04    0.11
  -1   0 -11   -0.15    0.09
  -1   0 -11   -0.02    0.08
   1   0  11    0.01    0.11
  -1   0 -11    0.06    0.09
  -2   0 -11   -0.10    0.11
  -2   0 -11   -0.04    0.11
  -2   0 -11    0.09    0.13
  -2   0 -11    0.17    0.17
   2   0  11    0.17    0.14
   3   0  11    0.18    0.22
  -3   0 -11   -0.09    0.16
  -3   0 -11   -0.19    0.11
  -3   0 -11    0.06    0.16
  -3   0 -11    0.12    0.20
  -3   0 -11    0.00    0.16
  -4   0 -11   -0.23    0.13
   4   0  11   -0.12    0.27
  -4   0 -11    0.09    0.20
  -4   0 -11    0.27    0.21
  -4   0 -11    0.16    0.20
  -5   0 -11   -0.23    0.16
   5   0  11    0.00    0.30
  -5   0 -11    0.00    0.21
  -5   0 -11    0.27    0.25
  -6   0 -11   -0.37    0.18
  -6   0 -11    0.04    0.26
   6   0  11   -0.29    0.35
  -6   0 -11   -0.20    0.21
  -7   0 -11   -0.20    0.27
  -7   0 -11   -0.11    0.26
  -7  -1  11   24.24    1.59
  -7  -1  11   25.71    1.79
  -7  -1  11   23.94    1.36
   7  -1 -11   22.23    1.40
   7   1 -11   22.79    1.44
  -7   1  11   20.76    1.49
  -7   1  11   25.62    1.79
  -6  -1  11   15.82    0.99
  -6  -1  11   14.58    1.19
   6  -1 -11   15.90    1.06
  -6  -1  11   17.46    1.44
   6   1 -11   15.42    1.09
  -6   1  11   14.12    1.14
  -6   1  11   16.13    1.43
  -5  -1  11   58.65    2.58
  -5  -1  11   61.27    2.44
  -5  -1  11   61.09    2.83
   5  -1 -11   60.37    2.51
   5   1 -11   59.65    2.52
  -5   1  11   57.95    2.83
  -5   1  11   58.25    2.55
  -4  -1  11  226.41    7.99
   4  -1 -11  216.09    7.91
  -4  -1  11  220.07    7.84
  -4  -1  11  218.97    8.10
  -4   1  11  216.09    7.94
   4   1 -11  221.69    7.94
  -4   1  11  221.19    8.24
  -3  -1  11   83.56    3.28
  -3  -1  11   83.42    3.09
   3  -1 -11   82.97    3.13
  -3  -1  11   82.68    3.21
   3  -1 -11   83.65    3.19
  -3   1  11   87.03    3.44
  -3   1  11   83.55    3.20
   3   1 -11   84.25    3.00
   3   1 -11   84.70    2.97
   3   1 -11   83.73    2.96
   3   1 -11   84.03    3.21
   2  -1 -11   36.87    1.51
   2  -1 -11   34.99    1.48
  -2  -1  11   36.11    1.49
  -2   1  11   34.36    1.32
   2   1 -11   34.84    1.50
  -2   1  11   36.99    1.63
  -2   1  11   37.98    1.51
   2   1 -11   37.04    1.38
   1  -1 -11  205.30    6.99
   1  -1 -11  198.79    6.85
  -1  -1  11  203.51    6.93
   1  -1 -11  199.11    6.95
   1   1 -11  191.63    6.89
  -1   1  11  181.96    6.96
  -1   1  11  196.36    6.94
   1   1 -11  192.68    6.93
   0  -1 -11   63.18    2.44
   0  -1 -11   65.45    2.35
   0  -1  11   64.93    2.41
   0  -1 -11   66.01    2.51
   0   1 -11   66.14    2.45
   0   1 -11   63.59    2.51
   0   1  11   66.10    2.44
   0   1 -11   64.86    2.42
   1  -1  11   31.29    1.24
  -1  -1 -11   30.92    1.35
  -1  -1 -11   32.54    1.31
  -1  -1 -11   30.57    1.21
  -1   1 -11   30.78    1.26
  -1   1 -11   29.52    1.32
   1   1  11   31.81    1.29
  -1   1 -11   30.81    1.16
  -1   1 -11   30.96    1.32
  -1   1 -11   30.09    1.31
  -1   1 -11   31.27    1.21
  -2  -1 -11    2.01    0.30
  -2  -1 -11    1.48    0.24
  -2  -1 -11    1.74    0.29
  -2  -1 -11    1.41    0.21
   2  -1  11    1.69    0.25
  -2   1 -11    1.72    0.26
  -2   1 -11    1.88    0.26
  -2   1 -11    1.44    0.27
  -2   1 -11    1.13    0.28
  -2   1 -11    1.58    0.22
   2   1  11    1.68    0.29
  -2   1 -11    1.64    0.25
  -3  -1 -11    2.96    0.34
  -3  -1 -11    2.59    0.36
  -3  -1 -11    2.60    0.37
  -3  -1 -11    2.78    0.36
   3  -1  11    1.99    0.31
  -3   1 -11    2.93    0.35
  -3   1 -11    2.95    0.38
  -3   1 -11    2.17    0.31
   3   1  11    3.01    0.42
  -3   1 -11    2.67    0.41
  -3   1 -11    2.86    0.40
  -3   1 -11    2.47    0.32
  -4  -1 -11   13.49    0.86
  -4  -1 -11   14.54    0.84
   4  -1  11   15.31    0.90
  -4  -1 -11   15.18    0.85
  -4   1 -11   14.09    0.76
  -4   1 -11   15.18    0.87
   4   1  11   14.81    0.94
  -4   1 -11   13.99    0.86
  -4   1 -11   14.99    0.83
  -4   1 -11   13.43    0.83
  -5  -1 -11    0.01    0.18
  -5  -1 -11   -0.01    0.21
  -5  -1 -11   -0.10    0.22
   5  -1  11   -0.48    0.27
  -5  -1 -11   -0.08    0.18
   5   1  11    0.08    0.34
  -5   1 -11    0.16    0.25
  -5   1 -11    0.05    0.22
  -5   1 -11    0.23    0.24
  -5   1 -11    0.20    0.23
  -6  -1 -11    0.89    0.34
  -6  -1 -11    0.85    0.30
  -6  -1 -11    0.56    0.32
   6   1  11    0.03    0.37
  -6   1 -11    0.79    0.34
  -6   1 -11    0.79    0.32
  -6   1 -11    1.00    0.39
  -6   1 -11    0.93    0.34
  -7  -1 -11   22.25    1.41
  -7  -1 -11   26.25    1.45
  -7   1 -11   20.72    1.34
   7   1  11   21.27    1.54
  -7   1 -11   25.70    1.43
  -7   1 -11   28.51    1.51
  -7  -2  11    1.88    0.77
  -7  -2  11    1.53    0.62
  -7  -2  11    1.92    0.43
  -7   2  11    2.15    0.47
  -7   2  11    3.17    0.84
  -7   2  11    1.41    0.54
   7   2 -11    1.52    0.55
  -6  -2  11    1.76    0.71
   6  -2 -11    1.92    0.47
  -6  -2  11    1.02    0.33
  -6  -2  11    1.66    0.50
   6   2 -11    1.25    0.44
  -6   2  11    1.83    0.39
  -6   2  11    0.50    0.43
  -6   2  11    2.23    0.73
  -5  -2  11    1.91    0.68
   5  -2 -11    1.95    0.42
  -5  -2  11    1.20    0.30
  -5  -2  11    1.00    0.46
  -5   2  11    1.41    0.43
  -5   2  11    0.94    0.28
  -5   2  11    1.56    0.70
   5   2 -11    1.35    0.42
  -4  -2  11    0.39    0.45
   4  -2 -11    0.25    0.16
  -4  -2  11    0.14    0.19
   4  -2 -11    0.36    0.27
  -4  -2  11    0.36    0.37
  -4   2  11    0.12    0.52
   4   2 -11    0.40    0.31
  -4   2  11    0.22    0.18
   4   2 -11    0.27    0.20
  -4   2  11   -0.09    0.28
  -3  -2  11    1.78    0.41
  -3  -2  11    2.49    0.29
   3  -2 -11    2.59    0.30
   3  -2 -11    2.13    0.35
  -3  -2  11    1.77    0.37
   3   2 -11    2.31    0.27
   3   2 -11    2.34    0.39
   3   2 -11    2.88    0.29
  -3   2  11    2.33    0.37
  -3   2  11    2.71    0.28
  -3   2  11    2.48    0.61
  -2  -2  11    4.97    0.30
  -2  -2  11    4.89    0.44
   2  -2 -11    5.19    0.41
   2  -2 -11    4.81    0.42
  -2   2  11    5.31    0.30
  -2   2  11    5.34    0.68
   2   2 -11    5.63    0.40
   2   2 -11    5.17    0.37
   2   2 -11    4.82    0.47
   2   2 -11    5.53    0.34
  -2   2  11    5.15    0.43
  -1  -2  11   78.48    2.82
   1  -2 -11   79.02    2.86
   1  -2 -11   77.82    2.80
   1  -2 -11   71.56    2.88
  -1   2  11   76.44    2.92
   1   2 -11   78.39    2.82
  -1   2  11   75.93    2.85
   1   2 -11   72.83    2.82
   1   2 -11   75.21    2.83
   0  -2 -11  100.45    3.66
   0  -2  11   96.46    3.64
   0  -2 -11  104.73    3.73
   0  -2 -11  101.27    3.79
   0   2 -11  107.72    3.80
   0   2  11  100.74    3.69
   0   2 -11  101.41    3.67
   0   2  11  103.94    3.72
   0   2 -11   99.22    3.73
   1  -2  11   10.33    0.53
  -1  -2 -11   10.25    0.61
  -1  -2 -11   11.57    0.70
  -1  -2 -11   10.40    0.56
  -1   2 -11   11.37    0.66
   1   2  11   11.51    0.63
  -1   2 -11   11.88    0.58
  -1   2 -11   11.32    0.69
  -1   2 -11   11.38    0.57
  -2  -2 -11    6.07    0.45
  -2  -2 -11    5.79    0.35
  -2  -2 -11    6.15    0.46
   2  -2  11    6.46    0.40
  -2   2 -11    5.13    0.37
  -2   2 -11    5.61    0.54
  -2   2 -11    6.27    0.46
   2   2  11    5.41    0.47
  -2   2 -11    5.44    0.40
  -2   2 -11    6.12    0.58
  -3  -2 -11   70.76    2.75
   3  -2  11   71.39    2.71
  -3  -2 -11   71.80    2.81
  -3   2 -11   64.82    2.81
  -3   2 -11   71.47    2.73
   3   2  11   76.97    2.85
  -3   2 -11   73.81    2.73
  -3   2 -11   68.17    2.86
  -3   2 -11   77.15    2.81
  -4  -2 -11   30.47    1.45
  -4  -2 -11   30.57    1.40
  -4   2 -11   32.73    1.39
   4   2  11   30.07    1.50
  -4   2 -11   28.53    1.35
  -4   2 -11   31.21    1.44
  -4   2 -11   27.89    1.43
  -5  -2 -11    1.98    0.43
  -5  -2 -11    1.96    0.39
  -5  -2 -11    2.24    0.44
  -5   2 -11    1.69    0.39
  -5   2 -11    1.58    0.38
  -5   2 -11    2.86    0.45
  -5   2 -11    2.78    0.41
   5   2  11    2.26    0.49
  -6  -2 -11   14.06    1.03
  -6  -2 -11   14.43    0.98
  -6   2 -11   13.75    0.94
  -6   2 -11   13.89    1.00
  -6   2 -11   15.15    1.01
  -6   2 -11   17.31    1.03
   6   2  11   13.74    1.13
  -7  -3  11    1.97    0.45
  -7  -3  11    0.99    0.59
  -7  -3  11    0.89    0.68
  -7   3  11    1.11    0.52
   7   3 -11    0.80    0.49
  -7   3  11    1.54    0.69
  -6  -3  11    4.18    0.73
  -6  -3  11    5.32    0.60
  -6  -3  11    5.24    0.91
  -6   3  11    5.68    0.64
   6   3 -11    4.92    0.71
  -6   3  11    3.45    0.64
  -6   3  11    4.36    0.86
  -5  -3  11   35.11    1.81
  -5  -3  11   33.93    1.91
  -5  -3  11   36.90    1.62
  -5   3  11   34.83    1.60
  -5   3  11   36.01    1.75
   5   3 -11   36.65    1.76
  -5   3  11   40.71    2.13
  -4  -3  11    8.92    0.84
  -4  -3  11   11.59    0.87
   4  -3 -11    9.91    0.71
  -4  -3  11    9.60    0.62
  -4   3  11    9.57    0.63
  -4   3  11    8.99    1.02
   4   3 -11    8.96    0.75
  -4   3  11    9.59    0.74
   4   3 -11   11.06    0.64
  -3  -3  11   -0.33    0.27
   3  -3 -11    0.05    0.13
   3  -3 -11    0.08    0.21
  -3  -3  11   -0.32    0.25
  -3  -3  11    0.17    0.15
   3   3 -11   -0.12    0.25
  -3   3  11   -0.14    0.22
  -3   3  11   -0.17    0.13
  -3   3  11    0.42    0.49
   3   3 -11   -0.01    0.14
   3   3 -11    0.14    0.21
   2  -3 -11    5.94    0.46
   2  -3 -11    5.59    0.45
  -2  -3  11    5.39    0.33
  -2  -3  11    6.34    0.52
   2   3 -11    4.87    0.42
   2   3 -11    4.78    0.37
  -2   3  11    6.05    0.46
  -2   3  11    5.36    0.39
  -2   3  11    4.89    0.66
   2   3 -11    5.33    0.50
   2   3 -11    5.46    0.48
  -1  -3  11    0.91    0.11
   1  -3 -11    0.99    0.21
   1  -3 -11    0.88    0.21
  -1  -3  11    0.96    0.22
   1  -3 -11    0.72    0.23
   1   3 -11    0.51    0.24
   1   3 -11    0.98    0.24
   1   3 -11    0.91    0.30
  -1   3  11    1.08    0.22
   1   3 -11    0.78    0.22
  -1   3  11    0.75    0.36
   1   3 -11    0.90    0.22
   0  -3 -11   31.51    1.28
   0  -3  11   29.98    1.20
   0  -3 -11   31.19    1.30
   0   3 -11   29.75    1.38
   0   3 -11   31.31    1.35
   0   3 -11   30.03    1.22
   0   3 -11   28.88    1.32
   0   3  11   31.12    1.29
   0   3 -11   29.91    1.39
   0   3  11   29.59    1.30
  -1  -3 -11    0.05    0.14
   1  -3  11    0.10    0.10
  -1  -3 -11    0.15    0.16
  -1   3 -11    0.01    0.10
   1   3  11    0.23    0.17
   1   3  11   -0.06    0.16
  -1   3 -11    0.21    0.23
  -1   3 -11   -0.13    0.14
  -1   3 -11    0.36    0.24
  -1   3 -11    0.04    0.16
  -2  -3 -11    0.00    0.16
  -2  -3 -11    0.12    0.17
  -2   3 -11   -0.04    0.18
  -2   3 -11    0.38    0.23
   2   3  11    0.01    0.19
  -2   3 -11    0.15    0.26
  -2   3 -11    0.03    0.09
  -3  -3 -11    6.93    0.56
  -3  -3 -11    5.88    0.51
  -3   3 -11    6.09    0.64
   3   3  11    5.83    0.58
  -3   3 -11    5.72    0.42
  -3   3 -11    5.32    0.54
  -4  -3 -11    8.61    0.67
  -4  -3 -11   10.25    0.74
  -4   3 -11    8.98    0.77
  -4   3 -11    9.63    0.73
   4   3  11   10.52    0.82
  -4   3 -11    9.74    0.62
  -5  -3 -11    1.32    0.38
  -5  -3 -11    1.56    0.39
  -5   3 -11    1.92    0.42
  -5   3 -11    1.12    0.30
  -5   3 -11    2.15    0.47
   5   3  11    1.28    0.40
  -6  -3 -11    2.30    0.49
  -6  -3 -11    3.37    0.54
   6   3  11    2.38    0.54
  -6   3 -11    3.23    0.48
  -6   3 -11    2.92    0.54
  -6   3 -11    3.90    0.62
  -6  -4  11   -0.14    0.60
   6   4 -11    0.20    0.42
  -6   4  11    0.48    0.41
  -6   4  11    0.18    0.49
  -5  -4  11   34.93    1.92
   5   4 -11   33.88    1.75
  -5   4  11   38.05    1.67
  -5   4  11   38.29    2.04
  -5   4  11   36.13    1.76
  -4  -4  11   12.24    0.84
  -4  -4  11   12.09    0.92
   4   4 -11   11.01    0.72
  -4   4  11   10.67    0.79
  -4   4  11   11.68    1.04
  -4   4  11   10.91    0.70
   4   4 -11   10.07    0.81
  -3  -4  11   12.60    0.69
   3  -4 -11   12.50    0.72
   3   4 -11   12.32    0.79
  -3   4  11   11.48    0.74
   3   4 -11   13.31    0.78
  -3   4  11   12.38    1.03
   3   4 -11   13.01    0.80
  -3   4  11   12.26    0.69
   3   4 -11   11.46    0.74
   2  -4 -11    1.06    0.25
   2  -4 -11    1.72    0.31
   2  -4 -11    1.82    0.34
  -2  -4  11    1.68    0.31
   2   4 -11    1.89    0.33
   2   4 -11    1.64    0.34
   2   4 -11    1.50    0.37
   2   4 -11    1.44    0.27
   2   4 -11    1.45    0.31
  -2   4  11    1.29    0.27
  -2   4  11    2.07    0.46
  -2   4  11    1.38    0.26
   1  -4 -11   71.39    2.68
   1  -4 -11   73.18    2.71
   1   4 -11   69.28    2.63
  -1   4  11   65.60    2.75
  -1   4  11   70.71    2.68
   1   4 -11   75.38    2.84
   1   4 -11   67.43    2.70
   1   4 -11   69.13    2.80
   1   4 -11   71.47    2.77
  -1   4  11   70.31    2.72
   0  -4  11   95.83    3.48
   0  -4 -11   98.40    3.64
   0  -4 -11  102.92    3.66
   0   4 -11   97.72    3.70
   0   4 -11  103.09    3.54
   0   4 -11  100.04    3.79
   0   4  11   98.83    3.63
   0   4  11   92.83    3.58
   0   4 -11   95.07    3.71
   0   4 -11   95.12    3.77
  -1  -4 -11   14.92    0.77
   1  -4  11   13.01    0.58
  -1  -4 -11   13.28    0.74
  -1   4 -11   15.34    0.89
   1   4  11   12.42    0.74
  -1   4 -11   13.81    0.62
  -1   4 -11   15.78    0.96
  -1   4 -11   11.71    0.89
  -1   4 -11   12.80    0.79
  -2  -4 -11   11.32    0.72
  -2  -4 -11   12.26    0.73
  -2   4 -11   12.50    0.83
  -2   4 -11   13.57    0.58
  -2   4 -11   11.25    0.85
  -2   4 -11   11.36    0.90
  -2   4 -11   10.96    0.75
   2   4  11   11.61    0.74
  -3  -4 -11    7.68    0.59
  -3  -4 -11    7.22    0.59
  -3   4 -11    6.27    0.68
  -3   4 -11    6.48    0.76
  -3   4 -11    6.70    0.42
   3   4  11    7.14    0.66
  -3   4 -11    6.81    0.60
  -4  -4 -11   44.72    1.88
  -4  -4 -11   43.33    1.89
  -4   4 -11   41.81    1.69
  -4   4 -11   37.31    1.87
  -4   4 -11   43.56    2.04
   4   4  11   38.89    1.90
  -4   4 -11   41.73    1.96
  -5  -4 -11   30.44    1.54
  -5  -4 -11   29.93    1.49
   5   4  11   25.15    1.51
  -5   4 -11   29.80    1.34
  -5   4 -11   32.56    1.66
  -5   4 -11   26.57    1.51
  -5   4 -11   29.80    1.58
  -6  -4 -11    7.33    0.81
  -6  -4 -11    6.39    0.79
  -6   4 -11    7.06    0.82
  -6   4 -11    7.90    0.91
  -6   4 -11    8.35    0.95
   6   4  11    5.54    0.82
  -6   4 -11    6.65    0.60
  -6   5  11    1.00    0.54
  -6   5  11    1.17    0.51
   6   5 -11    0.85    0.51
  -5   5  11   41.56    2.19
   5   5 -11   44.68    2.02
  -5   5  11   40.34    1.95
  -4  -5  11   65.86    2.83
   4   5 -11   72.21    2.83
   4   5 -11   70.03    2.82
  -4   5  11   66.14    2.75
  -4   5  11   67.73    3.00
  -4   5  11   67.76    2.80
   4   5 -11   67.25    2.80
   3  -5 -11   13.69    0.82
   3   5 -11   14.83    0.91
  -3   5  11   13.00    0.80
  -3   5  11   12.10    0.94
   3   5 -11   13.40    0.87
   3   5 -11   14.82    0.90
   3   5 -11   13.69    0.90
   2  -5 -11    4.22    0.50
   2   5 -11    4.07    0.45
   2   5 -11    4.62    0.47
   2   5 -11    3.90    0.51
  -2   5  11    3.90    0.42
  -2   5  11    4.49    0.46
   2   5 -11    4.25    0.58
   2   5 -11    4.92    0.59
  -2   5  11    4.98    0.58
   1  -5 -11   24.33    1.16
  -1   5  11   23.74    1.10
   1   5 -11   24.02    1.04
   1   5 -11   24.30    1.27
   1   5 -11   24.15    1.23
  -1   5  11   23.99    1.14
   1   5 -11   24.27    1.17
   1   5 -11   22.52    1.27
  -1   5  11   22.19    1.16
   0  -5 -11   24.98    1.20
   0   5  11   24.26    1.28
   0   5 -11   25.49    1.28
   0   5  11   25.82    1.17
   0   5 -11   24.14    1.35
   0   5 -11   26.69    1.38
   0   5 -11   25.77    1.02
   0   5 -11   25.26    1.28
  -1  -5 -11   -0.08    0.18
  -1   5 -11    0.27    0.21
  -1   5 -11    0.13    0.31
  -1   5 -11    0.06    0.27
  -1   5 -11    0.03    0.27
   1   5  11   -0.02    0.16
  -2  -5 -11    6.55    0.56
  -2  -5 -11    5.80    0.59
  -2   5 -11    7.59    0.71
  -2   5 -11    6.23    0.75
  -2   5 -11    7.98    0.63
  -2   5 -11    6.56    0.70
   2   5  11    6.99    0.57
  -3  -5 -11    0.52    0.28
  -3  -5 -11    0.33    0.22
  -3   5 -11    0.72    0.29
  -3   5 -11    0.85    0.36
  -3   5 -11    1.11    0.46
   3   5  11   -0.04    0.22
  -4  -5 -11   11.97    0.83
  -4  -5 -11   10.76    0.81
   4   5  11   11.23    0.87
  -4   5 -11   12.08    0.89
  -4   5 -11   12.86    1.04
  -4   5 -11   11.87    0.98
  -5  -5 -11    5.16    0.71
  -5  -5 -11    6.63    0.75
  -5   5 -11    7.20    0.79
  -5   5 -11    6.06    0.78
   5   5  11    3.98    0.61
  -5   5 -11    6.22    0.87
  -5   6  11    0.35    0.38
   5   6 -11    0.23    0.41
  -5   6  11    0.43    0.37
   4   6 -11    1.58    0.44
   4   6 -11    1.65    0.41
  -4   6  11    2.05    0.48
  -4   6  11    2.07    0.41
   3  -6 -11    1.48    0.37
  -3   6  11    2.89    0.50
  -3   6  11    1.94    0.34
   3   6 -11    1.49    0.39
   3   6 -11    1.50    0.38
   3   6 -11    1.76    0.48
   3   6 -11    1.11    0.36
   2  -6 -11    0.24    0.23
   2   6 -11    0.00    0.23
   2   6 -11   -0.25    0.21
   2   6 -11    0.09    0.36
   2   6 -11    0.10    0.28
  -2   6  11    0.43    0.20
   2   6 -11    0.03    0.22
  -2   6  11    0.21    0.22
   1  -6 -11    3.42    0.49
   1   6 -11    2.82    0.45
  -1   6  11    3.93    0.53
  -1   6  11    3.03    0.36
   1   6 -11    3.42    0.60
   1   6 -11    4.81    0.68
   1   6 -11    3.28    0.50
   0  -6 -11    0.04    0.20
   0   6  11    0.05    0.26
   0   6 -11   -0.04    0.26
   0   6  11    0.10    0.16
   0   6 -11    0.39    0.26
   0   6 -11    0.14    0.37
   0   6 -11   -0.09    0.33
  -1  -6 -11    0.47    0.26
  -1   6 -11    0.01    0.39
  -1   6 -11   -0.13    0.19
  -1   6 -11    0.30    0.33
   1   6  11    0.70    0.24
   1   6  11   -0.03    0.29
  -1   6 -11   -0.04    0.37
  -2  -6 -11   20.80    1.15
  -2   6 -11   20.39    1.29
   2   6  11   22.68    1.34
  -2   6 -11   24.64    1.47
  -2   6 -11   23.13    1.25
   2   6  11   20.90    1.12
  -3  -6 -11   13.42    0.91
  -3   6 -11   13.64    0.98
  -3   6 -11   14.18    1.15
   3   6  11   16.17    1.13
  -3   6 -11   13.21    1.06
   3   6  11   13.83    0.90
  -4  -6 -11    6.36    0.72
  -4   6 -11    5.29    0.76
   4   6  11    5.68    0.67
  -4   6 -11    7.28    0.81
   4  -7 -11   14.46    1.04
   4   7 -11   16.78    1.14
   4   7 -11   15.19    1.00
   3  -7 -11    3.20    0.53
   3   7 -11    3.05    0.64
   3   7 -11    3.02    0.57
   2  -7 -11    3.65    0.53
   2   7 -11    3.95    0.65
   2   7 -11    3.91    0.61
  -2   7  11    3.01    0.48
  -2   7  11    4.22    0.43
   2   7 -11    3.80    0.69
   1  -7 -11   16.54    0.98
   1   7 -11   14.02    1.13
  -1   7  11   14.98    1.01
   1   7 -11   13.47    0.96
  -1   7  11   16.19    0.83
   1   7 -11   15.54    1.05
   1   7 -11   13.74    1.14
   0  -7 -11   13.16    0.89
   0   7  11   14.61    1.04
   0   7  11   13.05    0.76
   0   7 -11   12.25    0.94
   0   7 -11   13.11    1.06
   0   7 -11   14.31    1.01
  -1  -7 -11   10.41    0.79
  -1   7 -11   10.74    0.91
   1   7  11   11.23    0.97
   1   7  11   10.87    0.71
  -1   7 -11   10.56    0.87
  -1   7 -11   12.64    1.10
  -2  -7 -11    0.02    0.25
  -2   7 -11    0.20    0.43
   2   7  11   -0.02    0.19
  -2   7 -11    0.07    0.23
  -2   7 -11   -0.76    0.28
   2   7  11   -0.27    0.32
  -3  -7 -11    2.74    0.50
   3   7  11    2.52    0.57
  -3   7 -11    2.50    0.60
   3   7  11    2.28    0.42
  -3   7 -11    2.83    0.67
  -3   7 -11    2.70    0.51
   1  -8 -11    0.17    0.27
   1   8 -11    0.30    0.34
   1   8 -11    0.94    0.49
   1   8 -11    0.33    0.31
  -1   8  11    0.39    0.34
   0  -8 -11    8.52    0.84
   0   8 -11    8.26    0.88
   0   8 -11    8.72    1.05
   0   8 -11    8.09    0.86
   0   8  11    8.58    0.89
  -1  -8 -11    8.85    0.90
  -1   8 -11   11.14    1.10
   1   8  11   11.90    1.12
  -1   8 -11   10.18    1.16
  -1   8 -11   11.07    0.95
   1   8  11    9.77    0.71
  -7   0  12   -0.08    0.61
   7   0 -12    0.24    0.41
  -7   0  12   -0.45    0.39
   6   0 -12    8.37    0.84
  -6   0  12    8.75    1.19
  -6   0  12    9.03    0.95
  -5   0  12    0.65    0.39
   5   0 -12    0.36    0.34
  -5   0  12    0.17    0.61
  -4   0  12  226.59    7.97
   4   0 -12  219.01    7.93
  -4   0  12  214.05    8.16
  -3   0  12  172.43    6.30
  -3   0  12  175.37    6.17
   3   0 -12  162.82    6.15
   2   0 -12    0.78    0.20
   2   0 -12    0.46    0.19
  -2   0  12    0.16    0.24
  -2   0  12    0.17    0.18
   1   0 -12  352.87   12.50
   1   0 -12  359.63   12.66
  -1   0  12  370.26   12.64
   1   0 -12  369.13   12.72
   0   0 -12  437.34   15.43
   0   0 -12  446.16   15.53
   0   0 -12  436.49   15.45
   0   0  12  460.32   15.45
  -1   0 -12   17.32    0.84
  -1   0 -12   19.25    0.86
  -1   0 -12   17.15    0.73
   1   0  12   18.60    0.83
  -1   0 -12   17.19    0.74
  -1   0 -12   18.17    0.90
  -2   0 -12   11.41    0.61
   2   0  12   12.22    0.67
  -2   0 -12   13.11    0.70
  -2   0 -12   12.94    0.69
  -2   0 -12   12.69    0.72
  -2   0 -12   13.37    0.64
  -3   0 -12    0.42    0.19
  -3   0 -12    0.44    0.21
  -3   0 -12    0.56    0.25
  -3   0 -12    0.08    0.17
  -3   0 -12    0.64    0.21
   3   0  12    0.60    0.23
  -4   0 -12   72.24    2.79
   4   0  12   74.31    2.87
  -4   0 -12   72.30    2.79
  -4   0 -12   67.19    2.81
  -4   0 -12   68.63    2.82
  -5   0 -12   10.65    0.80
   5   0  12   10.09    0.87
  -5   0 -12   11.84    0.79
  -5   0 -12   11.56    0.78
  -6   0 -12    0.78    0.33
  -6   0 -12    0.01    0.28
  -6   0 -12    0.70    0.31
   6   0  12   -0.55    0.35
  -7   0 -12   -0.33    0.25
  -7   0 -12    0.31    0.34
  -7  -1  12    5.20    1.00
  -7  -1  12    5.35    0.87
   7  -1 -12    5.13    0.75
  -7   1  12    5.60    1.06
  -7   1  12    4.99    0.82
   7   1 -12    4.74    0.75
  -6  -1  12    0.72    0.30
  -6  -1  12    0.23    0.68
   6  -1 -12    2.27    0.49
  -6  -1  12    1.02    0.52
   6   1 -12    0.59    0.40
  -6   1  12    1.53    0.53
  -6   1  12    1.57    0.69
  -5  -1  12   63.59    2.99
  -5  -1  12   66.39    2.79
  -5  -1  12   67.91    2.65
   5  -1 -12   64.80    2.70
   5   1 -12   62.52    2.70
  -5   1  12   65.65    3.08
  -5   1  12   64.23    2.75
   4  -1 -12  113.67    4.26
  -4  -1  12  111.67    4.45
  -4  -1  12  116.88    4.33
  -4   1  12  110.43    4.59
   4   1 -12  109.74    4.27
  -4   1  12  114.72    4.29
   3  -1 -12    2.25    0.30
  -3  -1  12    2.22    0.40
  -3  -1  12    1.99    0.43
   3  -1 -12    1.80    0.32
  -3   1  12    1.93    0.36
  -3   1  12    2.03    0.57
   3   1 -12    2.13    0.20
   3   1 -12    2.50    0.22
   3   1 -12    2.10    0.38
  -2  -1  12    3.59    0.38
   2  -1 -12    2.99    0.34
   2  -1 -12    3.70    0.40
   2   1 -12    3.40    0.39
  -2   1  12    3.48    0.38
  -2   1  12    3.55    0.51
   2   1 -12    3.10    0.26
  -2   1  12    3.20    0.20
   1  -1 -12    8.29    0.42
   1  -1 -12    8.30    0.53
  -1  -1  12    9.54    0.53
   1  -1 -12    8.48    0.52
  -1   1  12    8.11    0.51
   1   1 -12    8.94    0.53
  -1   1  12    7.68    0.55
   1   1 -12    7.94    0.32
   0  -1  12    8.61    0.49
   0  -1 -12    9.15    0.57
   0  -1 -12    9.15    0.53
   0  -1 -12    9.14    0.44
   0   1 -12    8.71    0.51
   0   1  12    8.86    0.52
   0   1 -12    8.74    0.57
   0   1 -12    8.96    0.53
   1  -1  12    0.76    0.18
  -1  -1 -12    0.60    0.19
  -1  -1 -12    0.40    0.19
  -1  -1 -12    0.55    0.15
  -1   1 -12    0.30    0.17
   1   1  12    0.49    0.19
  -1   1 -12    0.29    0.17
  -1   1 -12    0.37    0.14
  -1   1 -12    0.44    0.11
  -1   1 -12    0.66    0.20
  -1   1 -12    0.43    0.16
   2  -1  12    2.29    0.30
  -2  -1 -12    1.94    0.27
  -2  -1 -12    1.93    0.31
  -2  -1 -12    2.04    0.26
  -2  -1 -12    2.00    0.31
   2   1  12    2.52    0.35
  -2   1 -12    2.56    0.34
  -2   1 -12    2.31    0.35
  -2   1 -12    2.12    0.26
  -2   1 -12    2.27    0.29
  -2   1 -12    2.23    0.37
  -2   1 -12    1.48    0.25
  -3  -1 -12    0.14    0.18
  -3  -1 -12    0.21    0.19
  -3  -1 -12    0.22    0.20
  -3  -1 -12    0.19    0.20
   3  -1  12    0.09    0.20
   3   1  12    0.30    0.25
  -3   1 -12   -0.01    0.24
  -3   1 -12    0.13    0.20
  -3   1 -12    0.25    0.18
  -3   1 -12    0.19    0.17
  -3   1 -12    0.02    0.18
  -3   1 -12    0.16    0.15
  -4  -1 -12    8.80    0.68
  -4  -1 -12   10.24    0.70
   4  -1  12   10.99    0.74
  -4  -1 -12    9.84    0.68
  -4   1 -12    9.53    0.65
   4   1  12   10.16    0.76
  -4   1 -12    9.08    0.69
  -4   1 -12   10.61    0.73
  -4   1 -12   10.34    0.63
  -4   1 -12    9.78    0.67
  -5  -1 -12   18.39    1.01
   5  -1  12   18.52    1.20
  -5  -1 -12   16.63    1.00
  -5  -1 -12   17.38    1.08
  -5  -1 -12   19.99    1.07
  -5   1 -12   17.74    1.04
  -5   1 -12   18.90    1.07
  -5   1 -12   19.53    1.09
  -5   1 -12   19.19    1.05
   5   1  12   18.24    1.17
  -6  -1 -12    2.32    0.49
  -6  -1 -12    2.36    0.43
  -6  -1 -12    2.16    0.46
   6   1  12    2.29    0.56
  -6   1 -12    3.06    0.55
  -6   1 -12    2.21    0.45
  -6   1 -12    3.55    0.52
  -6   1 -12    1.74    0.42
  -7  -2  12    0.01    0.48
  -7  -2  12   -0.08    0.62
  -7  -2  12    0.34    0.28
   7   2 -12    0.43    0.45
  -7   2  12    0.04    0.44
  -7   2  12   -0.02    0.61
  -6  -2  12   23.33    1.68
   6  -2 -12   21.07    1.27
  -6  -2  12   25.45    1.26
  -6  -2  12   20.40    1.41
  -6   2  12   23.76    1.71
   6   2 -12   20.60    1.29
  -6   2  12   23.03    1.19
  -6   2  12   22.34    1.43
   5  -2 -12    4.39    0.57
  -5  -2  12    2.68    0.72
  -5  -2  12    4.52    0.51
  -5  -2  12    3.90    0.63
  -5   2  12    4.39    0.62
  -5   2  12    4.50    0.92
   5   2 -12    3.72    0.56
  -5   2  12    3.39    0.42
  -4  -2  12   14.45    1.04
   4  -2 -12   12.88    0.84
  -4  -2  12   13.44    0.73
   4  -2 -12   13.00    0.69
  -4  -2  12   13.20    0.94
  -4   2  12   11.44    0.68
  -4   2  12   13.03    0.87
  -4   2  12   12.65    1.15
   4   2 -12   12.63    0.86
  -3  -2  12   27.04    1.11
  -3  -2  12   27.12    1.29
  -3  -2  12   26.36    1.33
   3  -2 -12   25.95    1.17
   3  -2 -12   25.78    1.23
   3   2 -12   26.88    1.12
  -3   2  12   26.58    1.08
  -3   2  12   22.44    1.47
   3   2 -12   26.92    1.08
  -3   2  12   26.57    1.25
   3   2 -12   27.06    1.27
   2  -2 -12    0.70    0.21
  -2  -2  12    0.73    0.25
   2  -2 -12    0.50    0.22
  -2   2  12    0.65    0.42
   2   2 -12    0.47    0.16
   2   2 -12    0.97    0.18
   2   2 -12    0.71    0.22
  -2   2  12    0.95    0.13
  -2   2  12    0.50    0.23
   2   2 -12    0.70    0.23
  -1  -2  12   36.38    1.45
   1  -2 -12   34.61    1.53
   1  -2 -12   37.01    1.43
   1  -2 -12   37.08    1.49
   1   2 -12   36.82    1.47
  -1   2  12   35.32    1.48
  -1   2  12   34.68    1.54
   1   2 -12   36.03    1.47
   1   2 -12   33.94    1.44
   0  -2 -12  146.51    5.20
   0  -2 -12  148.77    5.28
   0  -2 -12  140.80    5.34
   0  -2  12  149.94    5.21
   0   2 -12  145.17    5.22
   0   2  12  150.09    5.27
   0   2 -12  147.31    5.34
   0   2 -12  144.73    5.28
   0   2  12  144.87    5.25
  -1  -2 -12   39.55    1.61
  -1  -2 -12   38.40    1.52
  -1  -2 -12   37.30    1.66
   1  -2  12   39.11    1.51
  -1   2 -12   38.39    1.63
  -1   2 -12   36.69    1.64
  -1   2 -12   38.31    1.53
   1   2  12   40.09    1.60
  -1   2 -12   39.48    1.53
  -2  -2 -12    5.17    0.54
  -2  -2 -12    4.08    0.32
  -2  -2 -12    4.20    0.45
  -2  -2 -12    4.12    0.41
   2  -2  12    3.92    0.34
  -2   2 -12    4.04    0.47
   2   2  12    4.03    0.45
  -2   2 -12    4.90    0.38
  -2   2 -12    3.86    0.32
  -2   2 -12    5.15    0.57
  -2   2 -12    4.70    0.44
  -3  -2 -12   -0.02    0.17
  -3  -2 -12    0.04    0.21
  -3  -2 -12   -0.12    0.18
   3  -2  12    0.16    0.17
  -3   2 -12    0.05    0.14
  -3   2 -12   -0.13    0.19
  -3   2 -12    0.17    0.19
   3   2  12    0.18    0.22
  -3   2 -12    0.19    0.16
  -3   2 -12    0.34    0.30
  -4  -2 -12    0.11    0.25
  -4  -2 -12    0.36    0.26
  -4  -2 -12    1.06    0.30
  -4   2 -12    0.10    0.23
  -4   2 -12    0.36    0.20
  -4   2 -12    0.53    0.26
  -4   2 -12    0.38    0.20
   4   2  12    0.57    0.30
  -5  -2 -12    1.73    0.39
  -5  -2 -12    1.43    0.37
  -5  -2 -12    1.57    0.40
  -5   2 -12    1.96    0.41
  -5   2 -12    2.27    0.39
  -5   2 -12    1.41    0.34
  -5   2 -12    1.75    0.40
   5   2  12    2.79    0.56
  -6  -2 -12    1.04    0.41
  -6  -2 -12    1.63    0.43
  -6  -2 -12    0.71    0.30
  -6   2 -12    1.70    0.40
   6   2  12    1.15    0.50
  -6   2 -12    0.96    0.37
  -6   2 -12    0.80    0.34
  -6   2 -12    1.07    0.35
  -6  -3  12   -0.57    0.60
  -6  -3  12    1.13    0.51
   6   3 -12    0.45    0.40
  -6   3  12    1.20    0.68
  -6   3  12    0.66    0.44
  -5  -3  12   18.95    1.40
  -5  -3  12   19.13    1.02
  -5  -3  12   20.21    1.27
   5   3 -12   19.97    1.19
  -5   3  12   18.52    1.01
  -5   3  12   21.10    1.53
  -5   3  12   17.82    1.15
  -4  -3  12  110.28    4.03
  -4  -3  12  112.03    4.24
  -4  -3  12  106.88    4.24
   4  -3 -12  109.02    4.13
  -4   3  12  101.82    4.43
   4   3 -12  112.62    4.18
  -4   3  12  105.66    4.15
  -4   3  12  108.39    4.02
   4   3 -12  113.38    4.03
   3  -3 -12    3.13    0.36
   3  -3 -12    2.89    0.40
  -3  -3  12    4.20    0.52
  -3  -3  12    2.83    0.47
  -3  -3  12    3.63    0.35
   3   3 -12    3.51    0.39
  -3   3  12    3.60    0.35
   3   3 -12    3.44    0.47
  -3   3  12    3.01    0.66
   3   3 -12    4.12    0.42
  -3   3  12    3.71    0.45
  -2  -3  12    1.12    0.29
  -2  -3  12    0.89    0.15
   2  -3 -12    0.60    0.22
   2  -3 -12    1.17    0.26
   2   3 -12    0.97    0.23
  -2   3  12    0.84    0.24
   2   3 -12    1.42    0.30
   2   3 -12    0.72    0.18
   2   3 -12    1.04    0.30
  -2   3  12    0.41    0.43
  -2   3  12    0.89    0.21
   1  -3 -12    4.96    0.41
   1  -3 -12    4.88    0.41
   1  -3 -12    6.17    0.52
  -1  -3  12    4.98    0.42
  -1   3  12    4.74    0.57
   1   3 -12    5.34    0.43
   1   3 -12    5.29    0.50
   1   3 -12    6.05    0.46
  -1   3  12    5.38    0.43
   1   3 -12    4.33    0.48
   1   3 -12    4.72    0.42
   0  -3 -12    1.83    0.28
   0  -3 -12    2.01    0.36
   0  -3  12    1.98    0.24
   0  -3 -12    1.65    0.26
   0   3  12    2.07    0.34
   0   3 -12    2.00    0.36
   0   3 -12    2.01    0.31
   0   3 -12    2.12    0.25
   0   3 -12    2.24    0.31
   0   3  12    1.56    0.26
  -1  -3 -12   18.33    0.87
  -1  -3 -12   17.29    0.90
   1  -3  12   18.01    0.78
   1   3  12   17.28    0.89
  -1   3 -12   17.49    0.88
  -1   3 -12   17.09    1.00
  -1   3 -12   18.31    0.81
  -1   3 -12   19.10    0.97
   1   3  12   18.13    0.80
  -2  -3 -12   36.82    1.55
  -2  -3 -12   36.40    1.58
  -2   3 -12   36.82    1.66
   2   3  12   35.60    1.59
  -2   3 -12   39.22    1.73
  -2   3 -12   36.85    1.56
  -2   3 -12   35.30    1.45
  -3  -3 -12   52.51    2.08
  -3  -3 -12   46.63    1.99
   3   3  12   48.36    2.06
  -3   3 -12   48.40    2.11
  -3   3 -12   48.61    2.04
  -3   3 -12   47.78    1.92
  -4  -3 -12   23.79    1.26
  -4  -3 -12   25.68    1.25
  -4   3 -12   24.63    1.15
   4   3  12   24.43    1.32
  -4   3 -12   24.23    1.27
  -4   3 -12   23.72    1.32
  -5  -3 -12   10.87    0.86
  -5  -3 -12   11.25    0.82
   5   3  12   11.48    0.93
  -5   3 -12   12.48    0.89
  -5   3 -12   12.24    0.77
  -5   3 -12   11.64    0.90
  -6  -3 -12    4.14    0.59
  -6  -3 -12    4.43    0.64
  -6   3 -12    3.69    0.59
  -6   3 -12    3.89    0.54
  -6   3 -12    5.73    0.71
   6   3  12    4.98    0.76
  -6  -4  12   -1.08    0.57
   6   4 -12    0.06    0.41
  -6   4  12   -0.35    0.35
  -6   4  12    0.55    0.56
  -5  -4  12   -0.60    0.46
  -5   4  12    1.18    0.57
   5   4 -12    0.06    0.34
  -5   4  12    0.72    0.38
  -4  -4  12    8.60    0.83
  -4   4  12   10.73    1.04
   4   4 -12   10.96    0.71
   4   4 -12   11.05    0.83
  -4   4  12   10.60    0.79
   3  -4 -12    1.52    0.29
   3   4 -12    1.50    0.35
   3   4 -12    1.42    0.35
   3   4 -12    1.44    0.34
   3   4 -12    1.14    0.29
  -3   4  12    1.54    0.32
  -3   4  12    0.90    0.24
  -3   4  12    1.40    0.48
   2  -4 -12    1.50    0.28
   2  -4 -12    1.60    0.34
   2  -4 -12    1.32    0.28
   2   4 -12    1.34    0.35
   2   4 -12    1.51    0.32
   2   4 -12    1.38    0.26
   2   4 -12    1.52    0.39
  -2   4  12    1.65    0.30
  -2   4  12    1.75    0.30
   2   4 -12    1.74    0.32
  -2   4  12    1.55    0.46
   1  -4 -12    6.14    0.48
   1  -4 -12    5.78    0.45
  -1   4  12    5.47    0.46
   1   4 -12    4.34    0.54
   1   4 -12    6.36    0.47
  -1   4  12    6.21    0.55
   1   4 -12    5.68    0.49
  -1   4  12    5.10    0.59
   1   4 -12    6.15    0.64
   1   4 -12    5.08    0.53
   0  -4 -12   20.19    0.95
   0  -4 -12   19.41    0.94
   0   4  12   18.39    0.93
   0   4 -12   16.57    1.03
   0   4 -12   19.90    1.02
   0   4 -12   19.49    0.85
   0   4 -12   19.66    1.09
   0   4  12   18.06    0.93
   0   4 -12   17.58    0.97
  -1  -4 -12   14.06    0.77
  -1   4 -12   11.81    0.90
  -1   4 -12   13.73    0.87
  -1   4 -12   12.38    0.87
  -1   4 -12   13.91    0.82
   1   4  12   13.12    0.76
  -1   4 -12   13.55    0.63
  -2  -4 -12    0.08    0.20
  -2  -4 -12    0.04    0.16
  -2   4 -12   -0.05    0.20
  -2   4 -12    0.25    0.29
  -2   4 -12    0.00    0.25
   2   4  12    0.13    0.19
  -2   4 -12   -0.02    0.31
  -3  -4 -12    1.60    0.33
  -3  -4 -12    1.61    0.35
  -3   4 -12    1.91    0.25
  -3   4 -12    1.62    0.36
  -3   4 -12    2.21    0.52
  -3   4 -12    2.15    0.45
   3   4  12    1.95    0.39
  -4  -4 -12    0.60    0.29
  -4  -4 -12    0.72    0.31
  -4   4 -12    0.26    0.16
  -4   4 -12    0.44    0.29
   4   4  12    0.40    0.31
  -4   4 -12    0.25    0.31
  -4   4 -12    0.40    0.38
  -5  -4 -12    0.13    0.28
  -5  -4 -12   -0.05    0.25
  -5   4 -12   -0.05    0.28
  -5   4 -12    0.03    0.17
  -5   4 -12    0.61    0.42
   5   4  12    0.15    0.34
  -5   4 -12    0.03    0.27
  -6  -4 -12   -0.06    0.29
  -6  -4 -12   -0.19    0.29
   6   4  12   -0.38    0.36
  -6   4 -12   -0.15    0.18
  -6   4 -12    0.42    0.38
  -6   4 -12    0.34    0.36
  -6   4 -12   -0.03    0.28
  -5   5  12    0.98    0.51
   5   5 -12    1.07    0.44
  -5   5  12    0.79    0.37
  -4  -5  12    4.32    0.63
   4   5 -12    3.72    0.53
   4   5 -12    3.71    0.54
  -4   5  12    3.21    0.49
   4   5 -12    3.14    0.52
  -4   5  12    3.37    0.62
   3  -5 -12   -0.14    0.16
   3   5 -12   -0.25    0.29
   3   5 -12    0.28    0.30
   3   5 -12   -0.12    0.19
  -3   5  12    0.29    0.35
   3   5 -12    0.20    0.23
  -3   5  12    0.29    0.23
   2  -5 -12   13.41    0.80
   2  -5 -12   14.32    0.88
   2   5 -12   13.21    0.77
   2   5 -12   12.62    0.87
  -2   5  12   12.13    0.75
   2   5 -12   11.62    0.74
   2   5 -12   12.47    0.83
  -2   5  12   12.99    0.87
   2   5 -12   13.00    0.88
  -2   5  12   11.42    0.72
   1  -5 -12    3.61    0.47
   1   5 -12    3.99    0.55
   1   5 -12    3.19    0.45
  -1   5  12    4.65    0.52
   1   5 -12    4.08    0.39
   1   5 -12    2.97    0.43
  -1   5  12    4.35    0.44
   1   5 -12    5.06    0.63
   0  -5 -12   20.55    1.04
   0   5 -12   20.91    1.20
   0   5 -12   19.86    1.21
   0   5 -12   19.35    0.86
   0   5  12   20.79    1.02
   0   5 -12   19.69    1.10
   0   5  12   21.05    1.13
   0   5 -12   19.70    1.10
  -1  -5 -12   19.00    0.99
   1   5  12   17.12    0.95
  -1   5 -12   17.32    1.03
  -1   5 -12   19.55    1.19
  -1   5 -12   18.33    1.15
  -1   5 -12   18.90    1.10
  -2  -5 -12    7.11    0.60
  -2  -5 -12    7.03    0.58
  -2   5 -12    7.72    0.65
  -2   5 -12    7.50    0.78
  -2   5 -12    7.51    0.84
  -2   5 -12    9.20    0.99
   2   5  12    7.48    0.60
  -3  -5 -12   14.00    0.88
  -3  -5 -12   13.66    0.86
   3   5  12   13.14    0.87
  -3   5 -12   12.83    0.98
  -3   5 -12   12.68    0.88
  -3   5 -12   12.99    1.05
  -4  -5 -12    4.35    0.56
  -4  -5 -12    5.64    0.65
   4   5  12    4.11    0.60
  -4   5 -12    6.17    0.74
  -4   5 -12    5.47    0.80
  -4   5 -12    6.12    0.71
  -5  -5 -12    2.94    0.61
  -5  -5 -12    2.56    0.50
   5   5  12    2.38    0.54
  -5   5 -12    3.03    0.56
  -5   5 -12    1.74    0.50
  -5   5 -12    2.10    0.55
  -5   6  12    7.40    0.77
  -5   6  12    8.64    1.00
   5   6 -12    7.34    0.82
   4   6 -12    5.09    0.64
   4   6 -12    4.62    0.62
  -4   6  12    4.96    0.57
  -4   6  12    5.58    0.77
   3  -6 -12   27.96    1.46
  -3   6  12   30.84    1.57
  -3   6  12   29.74    1.40
   3   6 -12   31.46    1.56
   3   6 -12   29.95    1.54
   3   6 -12   28.72    1.53
   3   6 -12   31.30    1.45
   2  -6 -12   40.48    1.79
   2   6 -12   41.71    1.92
  -2   6  12   37.44    1.74
   2   6 -12   41.30    1.89
   2   6 -12   40.16    1.89
  -2   6  12   37.28    1.67
   2   6 -12   39.70    1.67
   1  -6 -12   14.80    0.90
   1   6 -12   13.92    0.93
   1   6 -12   14.45    1.04
   1   6 -12   15.19    1.04
  -1   6  12   14.11    0.80
   1   6 -12   14.15    0.96
  -1   6  12   14.69    0.95
   0  -6 -12   44.36    1.94
   0   6 -12   46.27    2.05
   0   6  12   43.03    1.87
   0   6  12   45.44    2.05
   0   6 -12   46.44    2.15
   0   6 -12   45.54    2.15
   0   6 -12   43.73    2.05
  -1  -6 -12   23.56    1.24
  -1   6 -12   27.67    1.53
  -1   6 -12   25.13    1.33
   1   6  12   26.22    1.41
  -1   6 -12   22.27    1.40
  -1   6 -12   23.54    1.34
   1   6  12   23.88    1.19
  -2  -6 -12    4.10    0.55
   2   6  12    3.74    0.63
   2   6  12    3.26    0.45
  -2   6 -12    4.26    0.74
  -2   6 -12    3.38    0.50
  -2   6 -12    3.38    0.58
  -3  -6 -12    0.77    0.34
  -3   6 -12    0.29    0.38
  -3   6 -12    0.87    0.37
   3   6  12    0.87    0.31
  -3   6 -12    1.24    0.52
  -4  -6 -12    0.43    0.29
  -4   6 -12    0.04    0.38
  -4   6 -12   -0.25    0.31
  -4   6 -12   -0.19    0.29
   4   6  12    0.13    0.26
   3  -7 -12    7.66    0.79
  -3   7  12    8.56    0.90
   3   7 -12    5.35    0.78
   3   7 -12    5.75    0.76
   2  -7 -12    9.58    0.90
   2   7 -12    8.59    0.93
   2   7 -12   10.46    0.85
   2   7 -12    7.32    0.86
  -2   7  12    8.89    0.62
   1  -7 -12    7.41    0.76
   1   7 -12    8.30    0.96
  -1   7  12    7.67    0.78
   1   7 -12   10.43    0.96
   1   7 -12    7.26    0.76
   1   7 -12    8.72    0.88
  -1   7  12    7.58    0.57
   0  -7 -12    4.04    0.57
   0   7 -12    3.55    0.57
   0   7 -12    4.48    0.65
   0   7  12    3.66    0.58
   0   7 -12    3.79    0.71
   0   7  12    3.30    0.42
   0   7 -12    4.53    0.76
  -1  -7 -12    0.51    0.29
  -1   7 -12    0.17    0.41
   1   7  12    0.20    0.21
  -1   7 -12   -0.12    0.33
  -1   7 -12    0.22    0.26
   1   7  12    0.31    0.32
  -2  -7 -12    0.89    0.34
  -2   7 -12    0.45    0.29
  -2   7 -12    0.44    0.48
   2   7  12    1.06    0.45
  -2   7 -12    0.36    0.42
   2   7  12    0.68    0.26
  -3  -7 -12    3.76    0.59
  -3   7 -12    4.35    0.73
   3   7  12    3.86    0.69
   3   7  12    4.08    0.55
  -3   7 -12    4.76    0.80
   1  -8 -12   24.94    1.42
  -1   8  12   26.59    1.51
   1   8 -12   28.19    1.60
   1   8 -12   28.41    1.70
   0  -8 -12   11.67    0.92
   0   8 -12   12.93    1.22
   0   8 -12   13.19    1.04
   0   8 -12   11.45    0.99
   0   8  12   13.17    1.08
  -7   0  13   -0.90    0.41
   7   0 -13    0.86    0.47
  -7   0  13    0.41    0.69
  -6   0  13   -0.34    0.64
  -6   0  13    0.04    0.38
   6   0 -13   -0.21    0.34
  -5   0  13    0.51    0.37
  -5   0  13   -0.28    0.59
   5   0 -13   -0.56    0.27
  -4   0  13    0.26    0.55
   4   0 -13   -0.05    0.27
  -4   0  13    0.18    0.31
  -3   0  13    0.03    0.25
  -3   0  13    0.26    0.36
   3   0 -13   -0.19    0.19
  -2   0  13   -0.08    0.26
   2   0 -13    0.01    0.16
   2   0 -13   -0.08    0.14
  -2   0  13   -0.22    0.16
   1   0 -13    0.41    0.19
   1   0 -13   -0.02    0.07
   1   0 -13    0.18    0.15
  -1   0  13    0.21    0.16
   0   0 -13    0.71    0.18
   0   0 -13    0.47    0.17
   0   0  13    0.54    0.17
  -1   0 -13   -0.04    0.09
  -1   0 -13   -0.11    0.09
   1   0  13   -0.08    0.13
  -1   0 -13    0.11    0.13
  -1   0 -13   -0.16    0.14
  -1   0 -13   -0.05    0.14
  -2   0 -13   -0.09    0.12
  -2   0 -13   -0.01    0.15
   2   0  13    0.05    0.18
  -2   0 -13   -0.04    0.15
  -2   0 -13   -0.10    0.17
  -2   0 -13    0.24    0.17
  -3   0 -13    0.15    0.18
  -3   0 -13    0.01    0.15
  -3   0 -13    0.23    0.19
  -3   0 -13   -0.02    0.22
   3   0  13    0.13    0.23
  -3   0 -13    0.07    0.18
  -4   0 -13    0.32    0.22
  -4   0 -13   -0.10    0.13
   4   0  13    0.00    0.28
  -4   0 -13   -0.05    0.17
  -4   0 -13    0.03    0.20
   5   0  13   -0.19    0.31
  -5   0 -13    0.13    0.24
  -5   0 -13    0.19    0.24
  -5   0 -13   -0.13    0.21
  -6   0 -13   -0.19    0.22
  -6   0 -13   -0.38    0.21
   6   0  13   -0.60    0.35
  -6   0 -13   -0.10    0.24
   7  -1 -13    8.06    0.85
  -7  -1  13    7.16    0.95
  -7  -1  13    9.56    1.31
   7   1 -13    7.00    0.85
  -7   1  13    8.18    0.98
  -7   1  13    9.88    1.36
  -6  -1  13   19.23    1.62
  -6  -1  13   21.24    1.42
   6  -1 -13   19.29    1.24
  -6   1  13   21.99    1.39
   6   1 -13   21.12    1.26
  -6   1  13   24.62    1.75
   5  -1 -13    4.02    0.53
  -5  -1  13    5.32    0.89
  -5  -1  13    4.21    0.60
   5   1 -13    3.99    0.57
  -5   1  13    3.22    0.54
  -5   1  13    5.45    0.97
  -4  -1  13   66.00    2.87
  -4  -1  13   70.03    2.76
   4  -1 -13   67.97    2.69
   4   1 -13   64.81    2.67
  -4   1  13   64.72    2.70
  -4   1  13   62.35    2.95
  -3  -1  13   13.53    0.85
   3  -1 -13   14.79    0.84
   3  -1 -13   13.56    0.75
  -3  -1  13   12.72    0.92
   3   1 -13   13.59    0.61
   3   1 -13   13.10    0.83
  -3   1  13   14.12    1.09
  -3   1  13   14.06    0.84
   3   1 -13   13.58    0.60
   2  -1 -13   90.88    3.34
  -2  -1  13   90.62    3.32
   2  -1 -13   87.55    3.33
  -2   1  13   88.97    3.44
  -2   1  13   83.54    3.08
   2   1 -13   88.45    3.21
   2   1 -13   91.11    3.34
  -2   1  13   86.28    3.30
   1  -1 -13   11.24    0.66
  -1  -1  13   11.15    0.61
   1  -1 -13   11.44    0.53
   1  -1 -13   10.74    0.63
   1   1 -13   10.12    0.66
   1   1 -13   10.65    0.61
  -1   1  13   10.35    0.67
  -1   1  13   10.80    0.63
   0  -1 -13   93.71    3.30
   0  -1 -13   94.02    3.43
   0  -1 -13   91.07    3.49
   0  -1  13   92.24    3.37
   0   1 -13   90.83    3.40
   0   1 -13   88.16    3.41
   0   1 -13   95.82    3.51
   0   1  13   91.77    3.41
  -1  -1 -13   47.03    1.99
  -1  -1 -13   48.05    1.93
   1  -1  13   48.71    1.87
  -1  -1 -13   46.92    1.82
  -1   1 -13   46.57    1.89
   1   1  13   50.25    1.92
  -1   1 -13   49.28    1.99
  -1   1 -13   46.85    1.95
  -1   1 -13   49.20    1.76
  -1   1 -13   50.40    1.82
  -1   1 -13   46.54    1.95
  -2  -1 -13   32.64    1.48
  -2  -1 -13   35.89    1.58
  -2  -1 -13   38.18    1.64
   2  -1  13   37.49    1.53
  -2  -1 -13   37.78    1.51
  -2   1 -13   37.41    1.47
   2   1  13   38.21    1.58
  -2   1 -13   39.85    1.63
  -2   1 -13   36.27    1.54
  -2   1 -13   37.63    1.62
  -2   1 -13   40.17    1.52
  -2   1 -13   37.31    1.61
  -3  -1 -13   36.74    1.55
  -3  -1 -13   36.68    1.66
  -3  -1 -13   38.77    1.70
   3  -1  13   40.93    1.63
  -3  -1 -13   40.31    1.61
  -3   1 -13   38.03    1.64
  -3   1 -13   40.07    1.62
  -3   1 -13   37.58    1.69
   3   1  13   38.43    1.67
  -3   1 -13   39.61    1.59
  -3   1 -13   36.61    1.62
  -3   1 -13   35.04    1.67
  -4  -1 -13   13.51    0.81
  -4  -1 -13   11.02    0.80
   4  -1  13   12.88    0.82
  -4  -1 -13   13.21    0.80
  -4   1 -13   12.69    0.79
  -4   1 -13   11.77    0.74
  -4   1 -13   11.23    0.78
  -4   1 -13   13.75    0.83
  -4   1 -13   13.13    0.75
   4   1  13   12.81    0.88
  -5  -1 -13    5.40    0.65
  -5  -1 -13    6.56    0.57
  -5  -1 -13    6.83    0.60
  -5  -1 -13    7.27    0.71
  -5   1 -13    7.74    0.75
  -5   1 -13    7.38    0.63
  -5   1 -13    7.00    0.71
  -5   1 -13    6.59    0.68
   5   1  13    6.56    0.76
  -6  -1 -13    3.87    0.53
  -6  -1 -13    4.23    0.62
  -6  -1 -13    3.18    0.55
  -6   1 -13    3.41    0.57
  -6   1 -13    4.27    0.59
  -6   1 -13    3.45    0.54
  -6   1 -13    3.90    0.56
   6   1  13    1.96    0.56
  -7  -2  13   15.50    1.38
  -7  -2  13   19.07    1.42
  -7  -2  13   19.93    1.67
  -7   2  13   18.69    1.64
   7   2 -13   17.15    1.27
  -7   2  13   16.69    1.38
  -6  -2  13   17.88    1.30
   6  -2 -13   17.28    1.12
  -6  -2  13   18.99    1.07
  -6  -2  13   16.96    1.50
  -6   2  13   18.40    1.57
   6   2 -13   17.91    1.20
  -6   2  13   16.17    1.21
  -5  -2  13   -0.13    0.39
   5  -2 -13   -0.18    0.27
  -5  -2  13   -0.58    0.50
  -5  -2  13    0.14    0.20
  -5   2  13   -0.19    0.22
  -5   2  13   -0.09    0.60
  -5   2  13    0.30    0.35
   5   2 -13    0.33    0.35
  -4  -2  13   58.20    2.57
  -4  -2  13   61.38    2.31
   4  -2 -13   57.25    2.41
   4  -2 -13   56.52    2.28
  -4  -2  13   59.84    2.49
   4   2 -13   59.95    2.45
  -4   2  13   57.46    2.25
  -4   2  13   56.96    2.78
  -4   2  13   59.60    2.45
  -3  -2  13  194.79    6.80
  -3  -2  13  202.86    7.00
   3  -2 -13  193.70    6.96
  -3  -2  13  186.05    7.03
   3  -2 -13  201.62    6.93
   3   2 -13  200.11    6.83
  -3   2  13  188.47    6.76
  -3   2  13  177.88    7.19
   3   2 -13  186.03    6.96
  -3   2  13  192.28    6.97
   3   2 -13  198.04    6.78
   2  -2 -13    0.30    0.18
   2  -2 -13    0.07    0.14
  -2  -2  13   -0.23    0.19
   2   2 -13    0.15    0.13
   2   2 -13    0.29    0.14
  -2   2  13   -0.10    0.16
   2   2 -13    0.12    0.20
  -2   2  13   -0.05    0.38
  -2   2  13    0.19    0.09
   2   2 -13    0.17    0.20
   1  -2 -13    1.09    0.21
   1  -2 -13    0.58    0.21
   1  -2 -13    0.76    0.24
  -1  -2  13    0.94    0.21
  -1   2  13    1.26    0.25
   1   2 -13    1.14    0.24
   1   2 -13    0.92    0.21
  -1   2  13    1.15    0.34
   0  -2 -13   94.07    3.38
   0  -2  13   96.83    3.31
   0  -2 -13   87.38    3.44
   0  -2 -13   89.40    3.28
   0   2  13   86.94    3.33
   0   2 -13   82.95    3.40
   0   2 -13   92.45    3.32
   0   2 -13   90.25    3.38
   0   2  13   90.44    3.36
  -1  -2 -13   10.90    0.65
  -1  -2 -13   10.58    0.70
  -1  -2 -13   10.94    0.57
   1  -2  13   10.36    0.56
  -1   2 -13   10.02    0.66
   1   2  13    9.67    0.62
  -1   2 -13   10.96    0.58
  -1   2 -13   10.11    0.69
  -1   2 -13    9.84    0.57
  -2  -2 -13   11.27    0.70
  -2  -2 -13   11.68    0.58
  -2  -2 -13   12.24    0.79
  -2  -2 -13   11.15    0.64
   2  -2  13   11.41    0.61
  -2   2 -13   10.77    0.71
   2   2  13   12.01    0.72
  -2   2 -13   10.33    0.62
  -2   2 -13   12.02    0.66
  -2   2 -13   11.67    0.57
  -2   2 -13   11.36    0.79
  -3  -2 -13   66.88    2.69
  -3  -2 -13   65.04    2.61
  -3  -2 -13   65.63    2.74
   3  -2  13   68.45    2.59
   3   2  13   68.34    2.71
  -3   2 -13   66.43    2.75
  -3   2 -13   66.72    2.56
  -3   2 -13   67.95    2.73
  -3   2 -13   65.35    2.60
  -3   2 -13   71.90    2.67
  -4  -2 -13   20.04    1.13
  -4  -2 -13   20.55    1.12
  -4  -2 -13   21.16    1.07
   4   2  13   21.59    1.19
  -4   2 -13   18.55    1.11
  -4   2 -13   19.20    1.01
  -4   2 -13   20.32    1.09
  -4   2 -13   19.08    1.03
  -5  -2 -13    0.04    0.25
  -5  -2 -13    0.48    0.29
  -5  -2 -13   -0.29    0.23
  -5   2 -13    0.35    0.28
  -5   2 -13   -0.16    0.19
  -5   2 -13    0.08    0.21
  -5   2 -13   -0.18    0.26
   5   2  13    0.13    0.35
  -6  -2 -13    1.71    0.45
  -6  -2 -13    2.29    0.43
  -6  -2 -13    3.02    0.55
  -6   2 -13    3.23    0.52
  -6   2 -13    2.06    0.40
   6   2  13    2.62    0.61
  -6   2 -13    1.88    0.47
  -6   2 -13    1.74    0.42
  -6  -3  13    4.91    0.97
  -6  -3  13    4.12    0.74
  -6   3  13    4.00    0.67
  -6   3  13    5.49    0.95
   6   3 -13    4.71    0.67
  -5  -3  13    0.01    0.53
  -5  -3  13    0.88    0.48
   5   3 -13   -0.11    0.31
  -5   3  13    1.01    0.67
  -5   3  13    0.06    0.32
  -4  -3  13   13.01    0.96
   4  -3 -13   12.56    0.82
  -4  -3  13   11.55    0.95
  -4   3  13   12.70    0.86
   4   3 -13   12.60    0.88
  -4   3  13   14.12    1.24
   3  -3 -13   45.26    1.84
  -3  -3  13   45.05    1.94
  -3  -3  13   45.53    1.98
   3  -3 -13   43.23    1.87
   3   3 -13   45.23    1.78
  -3   3  13   44.14    1.89
   3   3 -13   42.81    1.81
   3   3 -13   43.55    1.90
  -3   3  13   45.02    2.21
  -3   3  13   44.40    1.87
   2  -3 -13    6.43    0.50
   2  -3 -13    6.01    0.50
  -2  -3  13    6.08    0.54
   2   3 -13    5.79    0.43
   2   3 -13    5.48    0.50
   2   3 -13    6.46    0.53
  -2   3  13    6.21    0.51
   2   3 -13    5.93    0.47
  -2   3  13    5.37    0.73
   1  -3 -13   45.99    1.79
  -1  -3  13   43.37    1.76
   1  -3 -13   42.85    1.89
   1  -3 -13   45.98    1.83
   1   3 -13   44.56    1.83
   1   3 -13   45.83    1.81
   1   3 -13   46.45    1.80
  -1   3  13   41.41    1.93
   1   3 -13   48.07    1.89
   1   3 -13   42.91    1.90
  -1   3  13   41.64    1.80
   0  -3 -13   37.72    1.56
   0  -3  13   36.80    1.46
   0  -3 -13   34.61    1.63
   0  -3 -13   37.27    1.51
   0   3  13   37.17    1.56
   0   3  13   35.77    1.54
   0   3 -13   36.94    1.49
   0   3 -13   36.06    1.64
   0   3 -13   36.74    1.59
   0   3 -13   37.18    1.59
  -1  -3 -13    1.34    0.27
  -1  -3 -13    0.90    0.25
   1   3  13    1.08    0.23
   1   3  13    1.66    0.30
  -1   3 -13    1.14    0.34
  -1   3 -13    1.03    0.25
  -1   3 -13    1.26    0.32
  -1   3 -13    1.11    0.19
  -2  -3 -13    1.69    0.33
  -2  -3 -13    1.47    0.30
  -2   3 -13    1.05    0.37
  -2   3 -13    1.79    0.25
  -2   3 -13    1.46    0.29
   2   3  13    1.39    0.32
  -2   3 -13    1.19    0.34
  -3  -3 -13    4.99    0.50
  -3  -3 -13    4.24    0.51
  -3   3 -13    4.25    0.62
   3   3  13    4.28    0.54
  -3   3 -13    4.46    0.56
  -3   3 -13    5.14    0.54
  -3   3 -13    4.83    0.40
  -4  -3 -13    9.29    0.71
  -4  -3 -13    9.19    0.69
  -4   3 -13    8.54    0.76
  -4   3 -13    9.24    0.61
   4   3  13    8.68    0.77
  -4   3 -13    7.98    0.70
  -5  -3 -13    0.42    0.38
  -5  -3 -13    0.75    0.33
  -5  -3 -13    0.55    0.29
  -5   3 -13    0.22    0.27
   5   3  13    0.11    0.31
  -5   3 -13    0.17    0.29
  -5   3 -13    0.44    0.24
  -6  -3 -13    1.94    0.47
  -6  -3 -13    1.53    0.45
  -6   3 -13    1.37    0.41
  -6   3 -13    1.52    0.37
   6   3  13    2.01    0.57
  -6   3 -13    1.37    0.45
  -6  -4  13    8.51    1.17
   6   4 -13    9.95    0.95
  -6   4  13    7.68    1.11
  -6   4  13    9.10    0.94
  -5  -4  13    9.19    1.01
   5   4 -13    6.73    0.75
  -5   4  13    8.34    1.03
  -5   4  13    6.63    0.74
  -4  -4  13   71.15    2.98
   4   4 -13   72.74    2.83
  -4   4  13   68.09    3.17
   4   4 -13   72.22    2.92
  -4   4  13   71.47    2.89
   3  -4 -13   52.29    2.10
   3   4 -13   48.44    2.11
   3   4 -13   52.38    2.08
  -3   4  13   47.78    2.35
   3   4 -13   52.74    2.20
   3   4 -13   51.37    2.12
  -3   4  13   49.07    2.10
   2  -4 -13    2.64    0.37
   2  -4 -13    2.62    0.40
   2  -4 -13    1.93    0.33
  -2   4  13    2.51    0.33
   2   4 -13    1.63    0.28
   2   4 -13    2.14    0.36
   2   4 -13    2.71    0.38
  -2   4  13    1.88    0.33
  -2   4  13    2.48    0.52
   2   4 -13    2.39    0.43
   2   4 -13    1.89    0.39
   1  -4 -13    1.95    0.31
   1  -4 -13    1.05    0.27
   1  -4 -13    1.58    0.37
  -1   4  13    1.37    0.41
   1   4 -13    1.37    0.38
   1   4 -13    1.08    0.25
   1   4 -13    0.96    0.37
  -1   4  13    1.49    0.30
   1   4 -13    1.39    0.31
   1   4 -13    1.06    0.27
   0  -4 -13    0.56    0.21
   0  -4 -13    0.47    0.22
   0   4 -13    0.31    0.21
   0   4 -13    0.37    0.35
   0   4  13    0.37    0.29
   0   4  13    0.52    0.21
   0   4 -13    0.95    0.36
   0   4 -13    0.41    0.26
   0   4 -13    0.51    0.18
  -1  -4 -13   -0.05    0.16
  -1  -4 -13   -0.06    0.18
  -1   4 -13   -0.04    0.21
  -1   4 -13    0.08    0.27
  -1   4 -13    0.03    0.12
  -1   4 -13   -0.14    0.24
   1   4  13    0.12    0.19
  -1   4 -13   -0.07    0.16
  -2  -4 -13    1.67    0.33
  -2  -4 -13    1.71    0.32
  -2   4 -13    1.88    0.23
  -2   4 -13    1.43    0.36
  -2   4 -13    1.57    0.33
  -2   4 -13    1.74    0.44
   2   4  13    2.21    0.37
  -2   4 -13    2.20    0.49
  -3  -4 -13   10.41    0.72
  -3  -4 -13   11.00    0.75
  -3   4 -13   10.68    0.58
  -3   4 -13   10.65    0.84
  -3   4 -13   10.98    0.88
   3   4  13   10.69    0.77
  -3   4 -13    9.83    0.74
  -4  -4 -13   15.58    0.96
  -4  -4 -13   15.65    0.93
  -4   4 -13   14.01    1.02
  -4   4 -13   13.81    0.76
  -4   4 -13   16.21    1.08
  -4   4 -13   13.60    0.93
   4   4  13   10.61    0.90
  -5  -4 -13    9.20    0.83
  -5  -4 -13   11.13    0.85
  -5   4 -13   10.35    0.87
  -5   4 -13   11.29    0.98
  -5   4 -13    9.72    0.96
   5   4  13   10.53    0.95
  -5   4 -13   11.37    0.71
   5   5 -13    0.59    0.41
  -5   5  13    0.98    0.41
  -5   5  13    1.42    0.58
  -4  -5  13    2.09    0.49
  -4   5  13    1.78    0.40
   4   5 -13    2.20    0.44
   4   5 -13    1.10    0.32
   4   5 -13    1.09    0.40
  -4   5  13    1.38    0.52
   3  -5 -13    0.57    0.26
   3  -5 -13    1.16    0.30
   3   5 -13    0.65    0.28
   3   5 -13    1.19    0.35
  -3   5  13    0.83    0.28
   3   5 -13    0.59    0.36
   3   5 -13    1.21    0.36
  -3   5  13    1.41    0.45
   2  -5 -13   29.60    1.41
   2  -5 -13   26.05    1.31
   2   5 -13   27.91    1.27
  -2   5  13   26.84    1.27
   2   5 -13   28.56    1.43
   2   5 -13   28.32    1.39
   2   5 -13   27.30    1.39
   2   5 -13   27.73    1.27
  -2   5  13   25.41    1.39
  -2   5  13   27.59    1.28
   1  -5 -13   44.09    1.90
   1   5 -13   44.86    1.93
   1   5 -13   46.26    2.06
   1   5 -13   43.86    2.02
   1   5 -13   44.46    1.79
  -1   5  13   46.45    1.94
  -1   5  13   46.06    1.88
   1   5 -13   42.98    1.97
   0  -5 -13   17.82    0.98
   0   5 -13   19.21    1.17
   0   5  13   18.59    1.08
   0   5 -13   18.63    1.17
   0   5 -13   19.29    1.07
   0   5 -13   18.41    1.07
   0   5  13   17.52    0.96
   0   5 -13   20.37    0.86
  -1  -5 -13   22.52    1.09
   1   5  13   19.45    1.05
  -1   5 -13   21.16    1.15
  -1   5 -13   21.42    1.28
  -1   5 -13   19.94    1.24
  -1   5 -13   19.89    1.15
  -2  -5 -13    2.18    0.38
  -2  -5 -13    1.71    0.38
  -2   5 -13    1.53    0.46
  -2   5 -13    2.05    0.53
   2   5  13    1.60    0.34
  -2   5 -13    2.04    0.45
  -3  -5 -13    1.34    0.37
  -3  -5 -13    1.04    0.31
  -3   5 -13    1.16    0.46
  -3   5 -13    1.87    0.40
  -3   5 -13    1.53    0.44
   3   5  13    1.04    0.33
  -4  -5 -13   11.96    0.87
  -4  -5 -13   11.65    0.86
   4   5  13   11.05    0.89
  -4   5 -13   11.63    0.95
  -4   5 -13   13.74    1.10
  -4   5 -13   12.55    0.91
  -5  -5 -13    5.44    0.77
  -5  -5 -13    8.03    0.81
   5   5  13    4.51    0.66
  -5   5 -13    6.52    0.77
  -5   5 -13    5.48    0.79
  -5   5 -13    7.96    0.97
  -4   6  13    0.54    0.31
   4   6 -13    0.29    0.36
  -4   6  13    0.83    0.40
   4   6 -13    0.40    0.31
   3  -6 -13   -0.06    0.21
  -3   6  13    0.49    0.24
   3   6 -13    0.18    0.27
   3   6 -13    0.23    0.36
   3   6 -13    0.03    0.25
   3   6 -13   -0.42    0.25
   2  -6 -13    0.13    0.30
   2  -6 -13    0.84    0.31
  -2   6  13    0.59    0.24
   2   6 -13    0.46    0.28
   2   6 -13    0.11    0.34
   2   6 -13    0.04    0.28
   2   6 -13    0.33    0.26
  -2   6  13    0.22    0.30
   1  -6 -13   10.42    0.76
  -1   6  13   11.59    0.72
   1   6 -13   11.55    0.95
   1   6 -13   11.38    0.93
   1   6 -13   11.89    0.86
   1   6 -13   11.59    0.84
  -1   6  13   11.16    0.83
   0  -6 -13    0.50    0.25
   0   6 -13   -0.02    0.28
   0   6  13    0.06    0.30
   0   6 -13    0.09    0.22
   0   6 -13    0.24    0.35
   0   6  13   -0.07    0.16
   0   6 -13    0.03    0.31
  -1  -6 -13    0.72    0.31
   1   6  13    0.37    0.36
  -1   6 -13    0.70    0.30
   1   6  13    0.50    0.25
  -1   6 -13    0.51    0.37
  -1   6 -13    0.38    0.41
  -1   6 -13    0.33    0.38
  -2  -6 -13    0.92    0.32
  -2   6 -13    0.99    0.40
   2   6  13    0.39    0.38
  -2   6 -13    0.40    0.25
  -2   6 -13    0.28    0.44
   2   6  13    0.82    0.29
  -3  -6 -13    4.38    0.59
  -3   6 -13    3.07    0.60
  -3   6 -13    3.47    0.67
   3   6  13    2.53    0.45
  -4  -6 -13    2.98    0.51
  -4   6 -13    2.33    0.56
   4   6  13    2.57    0.49
  -4   6 -13    2.96    0.68
  -4   6 -13    2.72    0.54
   3  -7 -13    7.24    0.79
   3   7 -13    7.28    0.88
  -3   7  13    8.29    0.65
   3   7 -13    6.64    0.80
   2  -7 -13   16.80    1.04
   2   7 -13   16.17    1.11
   2   7 -13   15.03    1.15
   2   7 -13   16.12    1.16
  -2   7  13   16.98    0.92
   1  -7 -13   59.78    2.65
   1   7 -13   65.68    2.87
   1   7 -13   61.27    2.85
  -1   7  13   65.69    2.76
   1   7 -13   63.01    2.71
  -1   7  13   63.72    2.54
   1   7 -13   66.11    2.83
   0  -7 -13   50.99    2.36
   0   7  13   56.58    2.52
   0   7 -13   55.62    2.49
   0   7 -13   54.93    2.51
   0   7  13   54.07    2.27
   0   7 -13   59.64    2.66
   0   7 -13   55.66    2.63
  -1  -7 -13   48.52    2.27
   1   7  13   49.75    2.21
  -1   7 -13   53.98    2.44
  -1   7 -13   55.36    2.49
   1   7  13   54.71    2.48
  -1   7 -13   55.82    2.61
  -2  -7 -13   33.64    1.70
   2   7  13   33.41    1.64
  -2   7 -13   37.71    1.86
  -2   7 -13   35.05    1.90
  -2   7 -13   35.65    1.98
   2   7  13   37.46    1.92
  -3  -7 -13    6.37    0.75
  -3   7 -13    6.33    0.86
   3   7  13    7.88    0.76
  -3   7 -13    8.68    1.09
   3   7  13    6.66    0.91
  -7   0  14   24.93    1.89
  -7   0  14   22.22    1.59
   7   0 -14   23.67    1.43
   6   0 -14   18.15    1.21
  -6   0  14   20.78    1.36
  -6   0  14   18.18    1.60
   5   0 -14    2.12    0.44
  -5   0  14    3.10    0.79
  -5   0  14    2.88    0.56
  -4   0  14    7.61    0.73
   4   0 -14    5.74    0.62
  -4   0  14    7.10    0.97
  -3   0  14   43.46    1.85
   3   0 -14   42.92    1.85
  -3   0  14   43.17    1.97
   2   0 -14    2.52    0.38
  -2   0  14    2.72    0.46
   2   0 -14    2.25    0.34
  -2   0  14    2.79    0.38
  -1   0  14  155.29    5.59
   1   0 -14  157.65    5.62
   1   0 -14  158.67    5.69
   1   0 -14  151.28    5.42
   0   0 -14   97.47    3.76
   0   0 -14  104.68    3.60
   0   0 -14   99.11    3.84
   0   0  14  106.88    3.76
  -1   0 -14    3.75    0.28
  -1   0 -14    3.99    0.45
  -1   0 -14    4.32    0.45
  -1   0 -14    4.30    0.43
   1   0  14    3.97    0.40
  -1   0 -14    3.78    0.28
  -2   0 -14   12.86    0.73
  -2   0 -14   14.83    0.77
  -2   0 -14   14.14    0.68
   2   0  14   13.74    0.73
  -2   0 -14   12.22    0.76
  -2   0 -14   11.71    0.64
  -3   0 -14   46.44    1.97
  -3   0 -14   48.99    2.08
  -3   0 -14   52.58    2.00
   3   0  14   52.25    2.07
  -3   0 -14   51.24    2.04
  -3   0 -14   48.63    2.06
  -3   0 -14   47.67    2.08
   4   0  14   90.94    3.40
  -4   0 -14   82.70    3.38
  -4   0 -14   81.33    3.36
  -4   0 -14   87.50    3.36
  -4   0 -14   87.44    3.31
   5   0  14   30.77    1.55
  -5   0 -14   29.81    1.43
  -5   0 -14   28.72    1.46
  -5   0 -14   26.52    1.44
  -6   0 -14    1.74    0.43
  -6   0 -14    2.69    0.50
  -6   0 -14    2.18    0.47
   7  -1 -14    4.58    0.72
  -7  -1  14    5.39    1.10
  -7  -1  14    3.96    0.79
  -7   1  14    3.61    0.78
  -7   1  14    5.09    1.10
   7   1 -14    3.63    0.68
  -6  -1  14    0.50    0.67
   6  -1 -14    0.07    0.34
  -6  -1  14    0.23    0.44
  -6   1  14    0.08    0.68
  -6   1  14    0.66    0.46
   6   1 -14    0.51    0.41
  -5  -1  14    9.89    0.94
  -5  -1  14    9.42    1.12
   5  -1 -14   10.17    0.81
  -5   1  14    8.00    0.86
   5   1 -14    8.91    0.80
  -5   1  14    8.52    1.18
  -4  -1  14    1.63    0.43
  -4  -1  14    0.28    0.46
   4  -1 -14    0.97    0.34
  -4   1  14    1.12    0.39
   4   1 -14    1.16    0.38
  -4   1  14    1.58    0.71
  -3  -1  14    0.74    0.37
   3  -1 -14    0.66    0.21
   3  -1 -14    0.66    0.29
  -3  -1  14    0.71    0.30
   3   1 -14    0.54    0.14
   3   1 -14    0.41    0.24
  -3   1  14    1.06    0.49
  -3   1  14    0.62    0.31
  -2  -1  14   11.16    0.70
   2  -1 -14   11.25    0.71
   2  -1 -14   11.02    0.68
   2   1 -14   12.20    0.60
  -2   1  14   11.29    0.70
  -2   1  14   11.56    0.84
   2   1 -14   10.99    0.71
  -1  -1  14    1.47    0.26
   1  -1 -14    1.70    0.30
   1  -1 -14    2.16    0.23
   1  -1 -14    1.50    0.29
   1   1 -14    1.84    0.31
   1   1 -14    1.90    0.29
  -1   1  14    2.12    0.32
  -1   1  14    1.44    0.32
   0  -1 -14   20.97    1.07
   0  -1 -14   22.10    1.03
   0  -1  14   21.99    0.98
   0  -1 -14   22.08    0.91
   0   1  14   21.96    1.02
   0   1 -14   22.20    1.01
   0   1 -14   20.58    1.01
   0   1 -14   23.77    1.12
  -1  -1 -14    0.17    0.13
   1  -1  14    0.26    0.17
  -1  -1 -14    0.08    0.16
  -1  -1 -14    0.41    0.20
   1   1  14    0.16    0.19
  -1   1 -14    0.14    0.10
  -1   1 -14    0.29    0.14
  -1   1 -14    0.27    0.18
  -1   1 -14    0.11    0.18
  -1   1 -14    0.30    0.17
  -1   1 -14    0.14    0.20
  -2  -1 -14    0.34    0.17
  -2  -1 -14   -0.03    0.15
  -2  -1 -14    0.26    0.18
   2  -1  14   -0.19    0.14
  -2  -1 -14   -0.21    0.13
   2   1  14   -0.27    0.18
  -2   1 -14    0.26    0.16
  -2   1 -14   -0.04    0.14
  -2   1 -14    0.07    0.22
  -2   1 -14   -0.24    0.14
  -2   1 -14    0.03    0.12
  -2   1 -14    0.06    0.17
  -3  -1 -14   -0.04    0.19
  -3  -1 -14   -0.06    0.19
  -3  -1 -14    0.49    0.22
   3  -1  14   -0.05    0.20
  -3  -1 -14    0.16    0.20
  -3   1 -14    0.24    0.18
   3   1  14    0.36    0.27
  -3   1 -14    0.23    0.19
  -3   1 -14    0.22    0.28
  -3   1 -14    0.36    0.19
  -3   1 -14    0.36    0.24
  -3   1 -14    0.27    0.21
   4  -1  14    0.03    0.26
  -4  -1 -14    0.02    0.22
  -4  -1 -14   -0.24    0.17
  -4  -1 -14   -0.01    0.18
  -4   1 -14    0.06    0.19
  -4   1 -14    0.06    0.20
  -4   1 -14   -0.08    0.20
  -4   1 -14    0.09    0.19
   4   1  14    0.05    0.26
  -4   1 -14    0.03    0.17
  -5  -1 -14    1.00    0.29
  -5  -1 -14    0.41    0.24
  -5  -1 -14    0.95    0.31
  -5  -1 -14    0.32    0.29
   5   1  14    0.80    0.38
  -5   1 -14    0.70    0.30
  -5   1 -14    0.52    0.26
  -5   1 -14    1.12    0.32
  -5   1 -14    1.18    0.35
  -6  -1 -14    0.14    0.23
  -6  -1 -14   -0.17    0.26
  -6  -1 -14    0.04    0.28
  -6   1 -14   -0.12    0.27
   6   1  14   -0.53    0.33
  -6   1 -14   -0.42    0.20
  -6   1 -14    0.24    0.27
  -6   1 -14    0.15    0.28
  -7  -2  14    1.58    0.86
  -7  -2  14    1.94    0.69
  -7   2  14    1.55    0.62
  -7   2  14    2.70    0.85
   7   2 -14    1.72    0.57
  -6  -2  14    0.05    0.45
   6  -2 -14    0.42    0.36
  -6  -2  14   -0.11    0.64
   6   2 -14    0.39    0.36
  -6   2  14   -0.02    0.39
  -6   2  14   -0.14    0.66
  -5  -2  14   18.33    1.40
  -5  -2  14   18.34    1.06
  -5  -2  14   17.55    1.17
   5  -2 -14   18.10    1.09
  -5   2  14   17.37    1.45
  -5   2  14   18.37    1.16
   5   2 -14   18.30    1.13
   4  -2 -14    4.51    0.41
  -4  -2  14    4.05    0.66
  -4  -2  14    4.54    0.44
   4  -2 -14    4.06    0.50
  -4  -2  14    4.30    0.57
  -4   2  14    5.14    0.89
  -4   2  14    3.52    0.49
   4   2 -14    3.18    0.48
   3  -2 -14    1.37    0.33
   3  -2 -14    1.26    0.27
  -3  -2  14    0.52    0.33
  -3  -2  14    0.73    0.34
   3   2 -14    0.42    0.29
  -3   2  14    1.40    0.62
   3   2 -14    1.07    0.28
  -3   2  14    0.62    0.30
   3   2 -14    1.30    0.23
  -2  -2  14   15.21    0.82
   2  -2 -14   15.15    0.82
   2  -2 -14   13.23    0.78
   2   2 -14   15.07    0.76
   2   2 -14   13.33    0.69
  -2   2  14   14.12    1.01
  -2   2  14   13.28    0.78
   2   2 -14   13.01    0.79
   2   2 -14   15.02    0.74
  -1  -2  14    0.80    0.21
   1  -2 -14    1.06    0.20
   1  -2 -14    0.74    0.23
   1  -2 -14    0.61    0.19
  -1   2  14    1.18    0.35
   1   2 -14    1.34    0.25
   1   2 -14    0.33    0.19
  -1   2  14    0.88    0.22
   0  -2 -14   39.27    1.78
   0  -2 -14   41.00    1.73
   0  -2 -14   42.07    1.63
   0  -2  14   41.68    1.65
   0   2 -14   42.68    1.68
   0   2  14   42.41    1.71
   0   2  14   40.92    1.72
   0   2 -14   41.33    1.72
   0   2 -14   42.07    1.79
  -1  -2 -14   80.51    2.98
  -1  -2 -14   79.78    3.16
  -1  -2 -14   79.36    3.07
   1  -2  14   84.59    2.99
  -1   2 -14   82.14    3.01
  -1   2 -14   76.28    3.12
   1   2  14   75.96    3.04
  -1   2 -14   80.41    3.10
  -1   2 -14   83.63    2.98
   2  -2  14   19.10    0.88
  -2  -2 -14   18.61    0.90
  -2  -2 -14   18.85    1.04
  -2  -2 -14   17.80    0.84
  -2  -2 -14   19.03    0.98
   2   2  14   17.16    0.96
  -2   2 -14   18.93    1.06
  -2   2 -14   19.70    1.03
  -2   2 -14   18.56    0.90
  -2   2 -14   19.26    0.82
  -2   2 -14   18.71    0.92
  -3  -2 -14   23.15    1.18
  -3  -2 -14   23.28    1.12
  -3  -2 -14   24.17    1.25
   3   2  14   24.72    1.22
  -3   2 -14   21.90    1.09
  -3   2 -14   21.92    1.25
  -3   2 -14   24.38    1.07
  -3   2 -14   23.35    1.15
  -3   2 -14   24.44    1.15
  -3   2 -14   22.02    1.21
  -4  -2 -14    9.00    0.72
  -4  -2 -14    9.57    0.68
  -4  -2 -14   10.11    0.74
  -4   2 -14    8.82    0.69
  -4   2 -14    8.75    0.65
   4   2  14    9.41    0.79
  -4   2 -14    8.43    0.73
  -4   2 -14    9.90    0.65
  -5  -2 -14    6.96    0.73
  -5  -2 -14    7.82    0.69
  -5  -2 -14    7.75    0.69
  -5   2 -14    7.42    0.64
  -5   2 -14    8.48    0.75
  -5   2 -14    7.52    0.77
  -5   2 -14    7.07    0.63
   5   2  14    7.27    0.82
  -6  -2 -14    2.13    0.43
  -6  -2 -14    1.18    0.40
  -6  -2 -14    2.12    0.48
  -6   2 -14    1.60    0.44
  -6   2 -14    2.85    0.51
  -6   2 -14    2.15    0.43
   6   2  14    1.40    0.48
  -6   2 -14    2.08    0.47
  -6  -3  14   27.13    1.64
  -6  -3  14   23.29    1.76
  -6   3  14   28.17    1.59
  -6   3  14   27.83    1.85
   6   3 -14   26.22    1.51
  -5  -3  14   32.90    1.70
  -5  -3  14   30.66    1.80
  -5   3  14   30.39    1.59
   5   3 -14   29.10    1.56
  -5   3  14   29.88    1.89
   4  -3 -14    6.20    0.62
  -4  -3  14    5.64    0.68
  -4  -3  14    5.56    0.71
  -4   3  14    4.54    0.58
  -4   3  14    5.45    0.90
   4   3 -14    5.13    0.58
   3  -3 -14   22.95    1.13
   3  -3 -14   22.80    1.09
  -3  -3  14   22.31    1.18
  -3   3  14   22.31    1.14
   3   3 -14   22.02    1.03
  -3   3  14   18.09    1.38
   3   3 -14   21.36    1.04
   3   3 -14   22.53    1.16
   2  -3 -14   30.99    1.40
  -2  -3  14   30.53    1.39
   2  -3 -14   30.56    1.35
   2  -3 -14   31.12    1.43
   2   3 -14   32.18    1.39
  -2   3  14   31.28    1.41
   2   3 -14   30.17    1.39
  -2   3  14   28.26    1.62
   2   3 -14   33.47    1.39
   2   3 -14   33.05    1.33
   1  -3 -14   35.21    1.54
   1  -3 -14   33.64    1.60
  -1  -3  14   35.43    1.48
   1  -3 -14   37.20    1.50
   1   3 -14   36.49    1.51
   1   3 -14   37.80    1.60
  -1   3  14   35.36    1.66
  -1   3  14   33.33    1.52
   1   3 -14   35.55    1.54
   1   3 -14   37.39    1.65
   1   3 -14   35.57    1.52
   0  -3 -14   78.21    2.84
   0  -3  14   71.46    2.79
   0  -3 -14   76.76    3.02
   0  -3 -14   74.51    2.90
   0   3  14   78.20    2.89
   0   3 -14   72.52    2.98
   0   3  14   70.34    2.88
   0   3 -14   78.12    2.94
   0   3 -14   76.48    2.83
  -1  -3 -14   28.52    1.32
  -1  -3 -14   28.61    1.25
  -1  -3 -14   29.37    1.44
  -1   3 -14   28.61    1.37
   1   3  14   27.12    1.29
   1   3  14   28.69    1.20
  -1   3 -14   28.31    1.21
  -1   3 -14   29.42    1.42
  -2  -3 -14    0.04    0.18
  -2  -3 -14    0.30    0.31
  -2  -3 -14    0.42    0.23
  -2   3 -14    0.06    0.24
   2   3  14    0.20    0.21
  -2   3 -14    0.19    0.19
  -2   3 -14   -0.21    0.28
  -2   3 -14    0.31    0.15
  -3  -3 -14   19.18    1.02
  -3  -3 -14   17.48    0.94
  -3  -3 -14   16.09    1.05
  -3   3 -14   18.68    1.07
   3   3  14   18.21    1.02
  -3   3 -14   14.07    1.02
  -3   3 -14   17.13    0.86
  -3   3 -14   17.60    0.98
  -4  -3 -14    6.85    0.60
  -4  -3 -14    5.36    0.61
  -4  -3 -14    6.41    0.74
  -4   3 -14    7.04    0.70
   4   3  14    5.55    0.67
  -4   3 -14    6.86    0.74
  -4   3 -14    5.83    0.51
  -5  -3 -14    0.13    0.26
  -5  -3 -14    0.03    0.24
  -5  -3 -14   -0.32    0.28
  -5   3 -14   -0.11    0.22
   5   3  14    0.22    0.37
  -5   3 -14    0.39    0.33
  -5   3 -14    0.29    0.22
  -6  -3 -14    0.72    0.36
  -6  -3 -14    0.91    0.39
  -6   3 -14    1.20    0.46
   6   3  14    0.39    0.42
  -6   3 -14    1.09    0.42
  -6   3 -14    1.06    0.33
  -6  -4  14    2.14    0.82
  -6   4  14    2.72    0.59
   6   4 -14    2.75    0.60
  -6   4  14    2.91    0.79
  -5  -4  14   -0.39    0.48
  -5   4  14    0.55    0.51
   5   4 -14    0.49    0.38
  -5   4  14    0.28    0.33
  -4  -4  14   -0.22    0.35
   4   4 -14    0.38    0.34
  -4   4  14   -0.13    0.45
   4   4 -14    0.10    0.20
  -4   4  14    0.04    0.26
   3  -4 -14   29.53    1.37
  -3   4  14   27.00    1.63
   3   4 -14   28.11    1.37
   3   4 -14   30.33    1.48
  -3   4  14   29.61    1.40
   3   4 -14   30.50    1.36
   3   4 -14   29.56    1.42
   2  -4 -14   13.38    0.78
   2  -4 -14   13.68    0.77
   2  -4 -14   13.03    0.82
  -2   4  14   13.13    0.73
   2   4 -14   12.14    0.81
   2   4 -14   13.00    0.79
   2   4 -14   12.00    0.70
   2   4 -14   12.47    0.85
  -2   4  14   12.60    0.78
  -2   4  14   12.03    0.96
   2   4 -14   11.60    0.76
   1  -4 -14   54.65    2.06
   1  -4 -14   50.16    2.17
   1  -4 -14   50.67    2.06
   1   4 -14   51.09    2.20
   1   4 -14   51.47    2.16
   1   4 -14   50.96    2.07
   1   4 -14   48.56    1.99
  -1   4  14   47.67    2.15
  -1   4  14   47.91    2.05
   1   4 -14   48.46    2.09
   0  -4 -14    0.15    0.26
   0  -4 -14   -0.05    0.16
   0  -4 -14    0.35    0.21
   0   4 -14    0.17    0.25
   0   4 -14    0.06    0.28
   0   4 -14    0.25    0.16
   0   4 -14    0.05    0.18
   0   4 -14   -0.06    0.30
   0   4  14    0.14    0.19
  -1  -4 -14    8.58    0.60
  -1  -4 -14    9.42    0.63
  -1   4 -14    7.79    0.68
  -1   4 -14    9.25    0.51
   1   4  14    7.81    0.60
  -1   4 -14    8.37    0.75
  -1   4 -14    8.26    0.78
  -2  -4 -14   11.04    0.74
  -2  -4 -14   12.44    0.74
   2   4  14   10.57    0.75
  -2   4 -14   12.87    0.85
  -2   4 -14   11.02    0.86
  -2   4 -14   12.32    0.91
  -2   4 -14   10.22    0.73
  -2   4 -14   12.28    0.62
  -3  -4 -14    8.52    0.66
  -3  -4 -14    7.96    0.64
   3   4  14    8.10    0.70
  -3   4 -14    8.89    0.86
  -3   4 -14    8.09    0.51
  -3   4 -14    8.34    0.67
  -4  -4 -14    4.02    0.55
  -4  -4 -14    3.72    0.53
   4   4  14    2.05    0.43
  -4   4 -14    4.51    0.67
  -4   4 -14    3.95    0.54
  -4   4 -14    4.32    0.43
  -5  -4 -14   -0.22    0.22
  -5  -4 -14   -0.09    0.26
  -5   4 -14    0.38    0.39
  -5   4 -14   -0.18    0.13
   5   4  14    0.03    0.29
  -5   4 -14   -0.10    0.23
  -5   4 -14    0.02    0.33
  -5  -5  14   26.30    1.66
  -5   5  14   28.76    1.54
  -5   5  14   28.25    1.77
   5   5 -14   28.50    1.55
  -4  -5  14   23.79    1.35
   4   5 -14   24.92    1.28
  -4   5  14   22.94    1.27
  -4   5  14   23.56    1.50
   4   5 -14   23.80    1.32
   4   5 -14   23.03    1.30
   3  -5 -14   94.64    3.72
   3  -5 -14   96.68    3.74
  -3   5  14   90.75    3.89
   3   5 -14  101.13    3.79
   3   5 -14  100.71    3.73
   3   5 -14   95.01    3.71
  -3   5  14   93.00    3.69
   3   5 -14   97.47    3.84
   2  -5 -14   11.92    0.79
   2  -5 -14   10.91    0.82
  -2   5  14   14.39    0.79
   2   5 -14   12.25    0.82
   2   5 -14   10.73    0.84
   2   5 -14   11.32    0.75
  -2   5  14   11.40    0.75
   2   5 -14   10.97    0.97
  -2   5  14   12.27    0.90
   2   5 -14   13.08    0.90
   1  -5 -14   23.34    1.20
   1  -5 -14   24.59    1.36
  -1   5  14   25.14    1.25
   1   5 -14   23.54    1.22
   1   5 -14   24.89    1.12
   1   5 -14   24.90    1.35
   1   5 -14   24.59    1.28
   1   5 -14   25.74    1.37
  -1   5  14   23.80    1.19
   0  -5 -14  104.77    3.90
   0   5 -14  100.18    4.08
   0   5 -14  106.07    3.73
   0   5 -14  103.91    4.10
   0   5 -14  100.00    3.97
   0   5  14  101.57    3.90
   0   5 -14  102.07    4.00
  -1  -5 -14    6.03    0.59
  -1   5 -14    5.05    0.62
   1   5  14    3.86    0.48
  -1   5 -14    4.93    0.72
  -1   5 -14    4.89    0.36
  -1   5 -14    4.80    0.60
  -1   5 -14    4.41    0.64
  -2  -5 -14    1.38    0.33
  -2  -5 -14    1.08    0.32
  -2   5 -14    1.24    0.47
  -2   5 -14    1.80    0.50
  -2   5 -14    0.91    0.34
   2   5  14    1.32    0.33
  -3  -5 -14    0.66    0.29
  -3  -5 -14    0.85    0.30
  -3   5 -14    0.69    0.31
  -3   5 -14    0.06    0.34
   3   5  14    0.66    0.32
  -3   5 -14    0.09    0.32
  -4  -5 -14    0.55    0.31
  -4  -5 -14    0.43    0.32
   4   5  14    0.84    0.36
  -4   5 -14    0.72    0.32
  -4   5 -14    0.56    0.42
  -4   5 -14    0.45    0.43
  -5  -5 -14    0.69    0.35
  -5  -5 -14    0.33    0.43
   5   5  14    0.01    0.33
  -5   5 -14   -0.10    0.36
  -5   5 -14    0.20    0.28
  -5   5 -14    0.35    0.41
   4  -6 -14    0.81    0.33
  -4   6  14    1.42    0.38
  -4   6  14    2.44    0.55
   4   6 -14    1.08    0.44
   4   6 -14    1.92    0.45
   3  -6 -14    3.24    0.50
   3   6 -14    2.93    0.53
   3   6 -14    3.16    0.49
  -3   6  14    3.96    0.49
   3   6 -14    4.27    0.63
   3   6 -14    3.60    0.69
   2  -6 -14   17.06    1.02
   2  -6 -14   16.98    1.09
   2   6 -14   18.80    0.96
  -2   6  14   18.16    0.97
   2   6 -14   15.96    1.10
   2   6 -14   16.95    1.11
   2   6 -14   16.12    1.07
   1  -6 -14   42.15    1.84
  -1   6  14   40.49    1.76
   1   6 -14   39.49    1.85
  -1   6  14   40.88    1.88
   1   6 -14   40.57    1.99
   1   6 -14   39.15    1.91
   1   6 -14   41.79    2.01
   0  -6 -14   22.02    1.19
   0   6 -14   23.22    1.40
   0   6 -14   23.28    1.40
   0   6  14   21.72    1.14
   0   6 -14   22.42    1.25
   0   6 -14   23.45    1.29
   0   6  14   23.26    1.31
  -1  -6 -14   15.33    0.96
  -1   6 -14   16.42    1.11
  -1   6 -14   18.80    1.26
  -1   6 -14   17.36    1.23
   1   6  14   14.90    0.92
  -1   6 -14   16.78    1.06
   1   6  14   14.53    1.07
  -2  -6 -14   32.64    1.59
  -2   6 -14   34.89    1.87
  -2   6 -14   32.51    1.73
   2   6  14   32.60    1.57
  -3  -6 -14   45.12    2.06
  -3   6 -14   45.71    2.26
   3   6  14   42.93    2.05
  -3   6 -14   49.83    2.40
  -4  -6 -14   11.25    0.91
  -4   6 -14   13.33    1.18
  -4   6 -14   11.20    1.13
   4   6  14   10.29    0.90
  -4   6 -14   10.76    0.92
   3  -7 -14    0.21    0.28
   3   7 -14    0.06    0.29
  -3   7  14    0.98    0.31
   2  -7 -14    8.93    0.78
   2  -7 -14    7.37    0.86
   2   7 -14   10.79    0.92
  -2   7  14   10.31    0.71
   2   7 -14   11.11    1.09
   2   7 -14   11.27    0.98
   1  -7 -14    0.34    0.28
  -1   7  14   -0.08    0.30
   1   7 -14    0.38    0.40
   1   7 -14   -0.05    0.34
   1   7 -14   -0.02    0.24
   1   7 -14    0.09    0.32
   0  -7 -14    0.80    0.33
   0   7 -14    1.58    0.45
   0   7 -14    0.97    0.51
   0   7  14    2.12    0.48
   0   7 -14    1.14    0.55
   0   7 -14    1.53    0.42
  -1  -7 -14   10.09    0.82
  -1   7 -14    9.62    0.98
   1   7  14   11.30    1.05
   1   7  14   10.40    0.77
  -1   7 -14   11.29    0.91
  -1   7 -14   12.46    1.12
  -2  -7 -14    1.79    0.43
   2   7  14    2.15    0.42
   2   7  14    3.37    0.63
  -2   7 -14    1.81    0.56
  -2   7 -14    2.14    0.49
  -2   7 -14    2.33    0.67
   7   0 -15    0.67    0.45
  -7   0  15   -0.33    0.46
  -7   0  15    0.34    0.76
  -6   0  15    0.25    0.43
   6   0 -15    0.08    0.32
  -6   0  15   -0.64    0.65
   5   0 -15   -0.17    0.30
  -5   0  15    1.02    0.67
  -5   0  15   -0.15    0.31
   4   0 -15   -0.26    0.23
  -4   0  15    0.33    0.31
  -4   0  15   -0.73    0.48
  -3   0  15   -0.04    0.25
  -3   0  15   -0.30    0.37
   3   0 -15    0.11    0.25
  -2   0  15   -0.38    0.26
   2   0 -15   -0.02    0.16
   2   0 -15   -0.08    0.18
  -2   0  15   -0.03    0.21
   1   0 -15   -0.10    0.08
   1   0 -15    0.12    0.18
  -1   0  15    0.16    0.18
   1   0 -15   -0.28    0.15
   0   0 -15    0.20    0.16
   0   0 -15    0.10    0.09
   0   0 -15    0.31    0.18
   0   0  15    0.07    0.16
  -1   0 -15   -0.04    0.14
  -1   0 -15   -0.08    0.14
   1   0  15    0.08    0.17
  -1   0 -15    0.07    0.11
  -1   0 -15    0.09    0.11
  -1   0 -15    0.00    0.16
  -2   0 -15    0.03    0.14
  -2   0 -15    0.14    0.20
  -2   0 -15    0.03    0.16
   2   0  15    0.13    0.19
  -2   0 -15    0.03    0.14
  -2   0 -15    0.04    0.15
  -3   0 -15   -0.02    0.17
  -3   0 -15    0.14    0.20
  -3   0 -15   -0.02    0.17
  -3   0 -15   -0.02    0.22
  -3   0 -15    0.02    0.18
   3   0  15   -0.19    0.20
  -3   0 -15   -0.01    0.18
  -4   0 -15    0.22    0.23
  -4   0 -15   -0.10    0.19
  -4   0 -15    0.18    0.19
  -4   0 -15    0.19    0.24
  -4   0 -15   -0.21    0.19
   4   0  15   -0.22    0.25
  -5   0 -15   -0.11    0.23
  -5   0 -15   -0.06    0.23
  -5   0 -15   -0.01    0.23
  -5   0 -15    0.04    0.22
   5   0  15   -0.18    0.29
  -6   0 -15   -0.11    0.26
  -6   0 -15   -0.11    0.23
  -6   0 -15    0.03    0.25
  -6   0 -15   -0.11    0.28
   7  -1 -15   -0.06    0.43
  -7  -1  15   -0.22    0.50
  -7  -1  15    0.16    0.75
  -7   1  15    1.20    0.82
  -7   1  15   -0.05    0.50
   7   1 -15    0.55    0.48
   6  -1 -15    3.86    0.60
  -6  -1  15    5.39    1.05
  -6  -1  15    5.04    0.79
  -6   1  15    4.83    1.04
  -6   1  15    3.69    0.65
   6   1 -15    4.23    0.64
   5  -1 -15    0.97    0.37
  -5  -1  15    0.66    0.41
  -5  -1  15    0.52    0.57
  -5   1  15    0.89    0.73
   5   1 -15    0.60    0.38
  -5   1  15    0.05    0.37
  -4  -1  15    1.91    0.43
   4  -1 -15    1.90    0.42
  -4  -1  15    2.63    0.62
  -4   1  15    2.67    0.76
   4   1 -15    1.63    0.39
  -4   1  15    1.64    0.42
   3  -1 -15   29.97    1.43
  -3  -1  15   29.63    1.52
  -3  -1  15   32.55    1.45
  -3   1  15   31.34    1.44
   3   1 -15   30.53    1.27
   3   1 -15   29.51    1.44
  -3   1  15   32.20    1.68
   2  -1 -15   13.77    0.82
  -2  -1  15   15.84    0.86
   2  -1 -15   16.37    0.88
  -2   1  15   15.46    0.98
  -2   1  15   14.94    0.84
   2   1 -15   14.92    0.74
   2   1 -15   14.93    0.84
   1  -1 -15   12.42    0.73
   1  -1 -15   14.02    0.79
  -1  -1  15   12.21    0.70
   1  -1 -15   13.07    0.60
   1   1 -15   13.58    0.81
  -1   1  15   12.91    0.73
   1   1 -15   11.71    0.71
  -1   1  15   11.13    0.76
   0  -1  15    8.21    0.52
   0  -1 -15    8.83    0.61
   0  -1 -15    8.13    0.44
   0  -1 -15    7.99    0.56
   0   1  15    8.46    0.57
   0   1 -15    7.22    0.52
   0   1 -15    7.99    0.61
   0   1 -15    7.34    0.53
  -1  -1 -15   36.17    1.49
  -1  -1 -15   38.80    1.70
   1  -1  15   39.47    1.57
  -1  -1 -15   41.06    1.43
  -1  -1 -15   40.32    1.65
  -1   1 -15   36.23    1.63
  -1   1 -15   37.16    1.42
   1   1  15   39.29    1.62
  -1   1 -15   36.14    1.67
  -1   1 -15   38.17    1.66
  -1   1 -15   36.91    1.59
  -1   1 -15   38.26    1.48
  -2  -1 -15   13.53    0.76
  -2  -1 -15   12.49    0.68
  -2  -1 -15   11.78    0.78
   2  -1  15   13.12    0.70
  -2  -1 -15   10.67    0.64
  -2   1 -15   11.61    0.76
  -2   1 -15   12.06    0.71
  -2   1 -15   12.16    0.61
  -2   1 -15   12.32    0.76
   2   1  15   12.38    0.75
  -2   1 -15   12.51    0.67
  -2   1 -15   11.59    0.76
  -3  -1 -15   84.00    3.45
   3  -1  15   93.72    3.43
  -3  -1 -15   88.54    3.52
  -3  -1 -15   86.82    3.35
  -3  -1 -15   95.01    3.39
  -3   1 -15   82.90    3.42
  -3   1 -15   96.71    3.42
   3   1  15   90.43    3.48
  -3   1 -15   91.29    3.35
  -3   1 -15   90.06    3.49
  -3   1 -15   88.40    3.47
  -3   1 -15   89.27    3.52
  -4  -1 -15   87.35    3.50
  -4  -1 -15   87.76    3.51
  -4  -1 -15   86.54    3.42
   4  -1  15   91.36    3.47
  -4   1 -15   90.99    3.44
  -4   1 -15   82.77    3.45
   4   1  15   88.44    3.53
  -4   1 -15   95.42    3.42
  -4   1 -15   88.29    3.53
  -4   1 -15   88.18    3.45
  -5  -1 -15    9.61    0.80
  -5  -1 -15   11.78    0.82
  -5  -1 -15   10.73    0.80
  -5  -1 -15   11.40    0.77
   5   1  15   10.20    0.87
  -5   1 -15    9.75    0.81
  -5   1 -15    9.07    0.76
  -5   1 -15   10.44    0.80
  -5   1 -15   10.74    0.76
  -6  -1 -15    3.19    0.57
  -6  -1 -15    2.53    0.50
  -6  -1 -15    2.60    0.48
  -6   1 -15    3.06    0.56
   6   1  15    2.62    0.60
  -6   1 -15    2.28    0.46
  -6   1 -15    2.93    0.49
  -6   1 -15    3.05    0.54
   6  -2 -15    2.23    0.49
  -6  -2  15    2.97    0.90
  -6  -2  15    2.03    0.57
  -6   2  15    3.76    0.95
  -6   2  15    2.72    0.59
   6   2 -15    1.68    0.50
  -5  -2  15   29.88    1.58
   5  -2 -15   25.76    1.40
  -5  -2  15   25.89    1.64
  -5   2  15   27.81    1.90
  -5   2  15   26.64    1.46
   5   2 -15   27.75    1.45
   4  -2 -15    0.82    0.32
  -4  -2  15    0.58    0.45
   4  -2 -15    0.64    0.23
  -4  -2  15    0.71    0.39
   4   2 -15    0.30    0.31
  -4   2  15    0.54    0.63
  -4   2  15    0.34    0.30
  -3  -2  15   -0.04    0.28
   3  -2 -15   -0.02    0.24
   3  -2 -15   -0.01    0.16
  -3  -2  15   -0.29    0.26
   3   2 -15    0.10    0.14
  -3   2  15    0.50    0.56
  -3   2  15   -0.19    0.25
   3   2 -15   -0.02    0.27
   2  -2 -15    1.39    0.30
  -2  -2  15    1.75    0.33
   2  -2 -15    1.47    0.31
  -2   2  15    1.60    0.52
   2   2 -15    1.54    0.30
   2   2 -15    1.66    0.25
  -2   2  15    1.40    0.31
   1  -2 -15   37.33    1.60
  -1  -2  15   39.31    1.56
   1  -2 -15   39.22    1.50
   1  -2 -15   35.25    1.63
   1   2 -15   36.99    1.56
   1   2 -15   37.45    1.58
  -1   2  15   35.53    1.64
  -1   2  15   36.30    1.59
   0  -2 -15  135.95    4.76
   0  -2  15  135.05    4.79
   0  -2 -15  134.94    4.88
   0  -2 -15  131.64    4.96
   0   2 -15  135.17    4.95
   0   2  15  126.85    4.83
   0   2 -15  133.52    4.82
   0   2  15  128.90    4.86
   0   2 -15  131.54    4.87
  -1  -2 -15    8.75    0.54
  -1  -2 -15    8.55    0.60
   1  -2  15   10.16    0.57
  -1  -2 -15    9.48    0.70
  -1   2 -15    9.00    0.63
   1   2  15    8.96    0.61
  -1   2 -15   10.11    0.55
  -1   2 -15    8.15    0.66
  -1   2 -15    8.99    0.56
  -2  -2 -15    1.07    0.24
  -2  -2 -15    1.21    0.32
  -2  -2 -15    0.83    0.21
  -2  -2 -15    0.92    0.26
   2  -2  15    0.87    0.21
  -2   2 -15    0.44    0.25
  -2   2 -15    0.95    0.34
   2   2  15    1.00    0.29
  -2   2 -15    0.65    0.23
  -2   2 -15    0.97    0.18
  -2   2 -15    0.77    0.21
  -3  -2 -15    5.48    0.48
  -3  -2 -15    6.40    0.66
  -3  -2 -15    4.05    0.50
  -3   2 -15    5.25    0.54
  -3   2 -15    5.16    0.47
   3   2  15    4.70    0.54
  -3   2 -15    4.53    0.60
  -3   2 -15    5.77    0.52
  -3   2 -15    4.87    0.56
  -3   2 -15    5.33    0.43
  -4  -2 -15    0.20    0.24
  -4  -2 -15    0.24    0.23
  -4  -2 -15    0.34    0.26
  -4   2 -15   -0.04    0.21
  -4   2 -15    0.13    0.20
  -4   2 -15   -0.14    0.20
   4   2  15    0.03    0.29
  -4   2 -15    0.12    0.18
  -5  -2 -15    0.19    0.28
  -5  -2 -15    0.86    0.33
  -5  -2 -15    0.49    0.27
  -5   2 -15   -0.04    0.26
  -5   2 -15    1.44    0.35
  -5   2 -15    0.41    0.25
  -5   2 -15    0.49    0.30
   5   2  15    0.73    0.39
  -6  -2 -15    1.13    0.39
  -6  -2 -15    1.02    0.41
  -6  -2 -15    1.27    0.36
  -6   2 -15    0.92    0.35
  -6   2 -15    0.67    0.31
  -6   2 -15    1.27    0.45
  -6   2 -15    0.69    0.34
   6   2  15    0.18    0.42
  -6  -3  15    7.92    1.19
  -6  -3  15   10.10    1.06
  -6   3  15    9.84    1.25
  -6   3  15    9.32    0.95
   6   3 -15    9.07    0.92
  -5  -3  15    4.62    0.83
  -5  -3  15    4.53    0.69
  -5   3  15    4.09    0.87
  -5   3  15    3.63    0.60
   5   3 -15    2.71    0.51
  -4  -3  15    4.62    0.67
   4  -3 -15    6.43    0.65
  -4  -3  15    6.38    0.75
  -4   3  15    6.10    0.65
  -4   3  15    5.67    0.95
   4   3 -15    6.31    0.68
   3  -3 -15   31.35    1.47
   3  -3 -15   30.40    1.48
  -3  -3  15   34.70    1.55
   3   3 -15   32.03    1.41
  -3   3  15   32.21    1.83
   3   3 -15   32.96    1.52
  -3   3  15   33.51    1.52
   2  -3 -15    1.11    0.29
   2  -3 -15    0.49    0.23
   2  -3 -15    1.33    0.27
  -2  -3  15    0.82    0.29
   2   3 -15    1.09    0.29
  -2   3  15    0.90    0.27
   2   3 -15    1.55    0.26
   2   3 -15    0.94    0.24
   2   3 -15    1.13    0.31
  -2   3  15    0.92    0.49
   1  -3 -15    4.99    0.55
   1  -3 -15    5.43    0.44
  -1  -3  15    5.00    0.47
   1  -3 -15    5.38    0.53
  -1   3  15    4.60    0.62
   1   3 -15    5.90    0.49
   1   3 -15    4.54    0.45
   1   3 -15    4.32    0.46
   1   3 -15    4.52    0.57
   1   3 -15    5.13    0.60
  -1   3  15    5.34    0.52
   0  -3 -15   14.30    0.89
   0  -3 -15   13.14    0.70
   0  -3 -15   12.58    0.76
   0   3  15   12.10    0.75
   0   3 -15   11.50    0.80
   0   3 -15   12.35    0.78
   0   3 -15   12.79    0.70
   0   3  15   11.94    0.77
  -1  -3 -15    5.50    0.56
  -1  -3 -15    5.13    0.45
  -1  -3 -15    4.15    0.55
   1   3  15    5.45    0.42
  -1   3 -15    4.58    0.53
  -1   3 -15    4.15    0.55
  -1   3 -15    4.76    0.40
   1   3  15    5.16    0.53
  -2  -3 -15    1.62    0.31
  -2  -3 -15    2.05    0.36
  -2  -3 -15    2.49    0.46
  -2   3 -15    1.49    0.34
  -2   3 -15    1.89    0.45
   2   3  15    1.25    0.32
  -2   3 -15    2.00    0.34
  -2   3 -15    1.50    0.25
  -3  -3 -15    2.16    0.44
  -3  -3 -15    1.56    0.34
  -3  -3 -15    1.85    0.38
   3   3  15    1.79    0.41
  -3   3 -15    1.35    0.43
  -3   3 -15    1.87    0.30
  -3   3 -15    1.64    0.33
  -3   3 -15    1.23    0.35
  -4  -3 -15    5.65    0.65
  -4  -3 -15    5.89    0.72
  -4  -3 -15    5.03    0.59
  -4   3 -15    5.13    0.68
  -4   3 -15    5.54    0.55
   4   3  15    5.43    0.70
  -4   3 -15    6.56    0.69
  -5  -3 -15    0.72    0.37
  -5  -3 -15    1.21    0.39
  -5  -3 -15    1.21    0.37
   5   3  15    1.35    0.47
  -5   3 -15    1.46    0.43
  -5   3 -15    0.63    0.25
  -5   3 -15    1.47    0.38
  -6  -4  15    6.83    1.14
  -6   4  15    5.89    0.81
  -6   4  15    9.33    1.22
   6   4 -15    7.51    0.86
  -5  -4  15   49.93    2.40
   5   4 -15   47.39    2.24
  -5   4  15   51.59    2.61
  -5   4  15   46.63    2.21
  -4  -4  15   19.86    1.24
  -4   4  15   17.17    1.39
  -4   4  15   19.45    1.11
   4   4 -15   19.24    1.15
   3  -4 -15   11.81    0.74
   3   4 -15   10.63    0.72
   3   4 -15   12.18    0.83
   3   4 -15    9.82    0.79
  -3   4  15   10.77    0.77
  -3   4  15   10.49    1.02
   2  -4 -15   87.68    3.38
   2  -4 -15   91.59    3.47
   2  -4 -15   89.87    3.37
   2   4 -15   89.39    3.51
   2   4 -15   84.11    3.29
  -2   4  15   84.36    3.57
   2   4 -15   89.23    3.41
   2   4 -15   91.10    3.37
  -2   4  15   82.26    3.28
   2   4 -15   87.97    3.41
  -2   4  15   87.56    3.38
   1  -4 -15   90.82    3.32
   1  -4 -15   90.66    3.29
   1  -4 -15   83.67    3.42
   1   4 -15   91.43    3.38
   1   4 -15   84.91    3.23
  -1   4  15   81.11    3.39
   1   4 -15   85.16    3.38
   1   4 -15   87.25    3.31
  -1   4  15   83.01    3.29
   1   4 -15   80.57    3.41
   0  -4 -15   50.04    1.94
   0  -4 -15   48.43    1.97
   0  -4 -15   47.91    2.12
   0   4 -15   48.80    2.10
   0   4 -15   42.11    2.05
   0   4 -15   45.00    1.85
   0   4 -15   45.83    2.01
   0   4  15   46.43    1.97
   0   4 -15   44.49    1.99
  -1  -4 -15   28.18    1.34
  -1  -4 -15   29.23    1.30
  -1   4 -15   27.92    1.48
  -1   4 -15   27.75    1.41
  -1   4 -15   25.76    1.43
   1   4  15   26.54    1.31
  -1   4 -15   29.14    1.20
  -2  -4 -15   15.99    0.88
  -2  -4 -15   14.74    0.91
  -2   4 -15   16.13    1.02
  -2   4 -15   16.31    1.09
  -2   4 -15   14.68    0.89
  -2   4 -15   16.00    0.77
   2   4  15   15.41    0.93
  -3  -4 -15   33.29    1.48
  -3  -4 -15   30.39    1.52
  -3   4 -15   31.54    1.33
  -3   4 -15   30.64    1.59
  -3   4 -15   29.71    1.67
  -3   4 -15   29.81    1.48
   3   4  15   30.78    1.53
  -4  -4 -15    4.87    0.62
  -4  -4 -15    6.26    0.65
   4   4  15    6.05    0.70
  -4   4 -15    5.58    0.47
  -4   4 -15    6.30    0.69
  -4   4 -15    4.84    0.67
  -5  -4 -15   -0.10    0.37
  -5  -4 -15    0.55    0.32
  -5  -4 -15    0.31    0.31
   5   4  15   -0.13    0.33
  -5   4 -15    0.84    0.34
  -5   4 -15    0.38    0.44
  -5   4 -15    0.03    0.17
  -5   4 -15    0.29    0.37
  -5  -5  15   11.74    1.14
  -5   5  15   13.83    1.04
   5   5 -15   14.80    1.05
  -5   5  15   11.41    1.26
  -4  -5  15    1.12    0.38
   4   5 -15    1.44    0.39
   4   5 -15   -0.19    0.33
  -4   5  15    0.80    0.33
  -4   5  15    1.04    0.50
   4   5 -15    0.62    0.29
   3  -5 -15    0.17    0.20
   3  -5 -15    0.15    0.22
  -3   5  15   -0.02    0.37
   3   5 -15    0.20    0.26
  -3   5  15    0.03    0.24
   3   5 -15    0.06    0.21
   3   5 -15   -0.23    0.26
   2  -5 -15   13.69    0.92
   2  -5 -15   12.18    0.82
   2   5 -15   15.53    0.85
  -2   5  15   12.63    0.95
   2   5 -15   13.38    0.95
   2   5 -15   15.69    0.94
   2   5 -15   13.39    0.95
  -2   5  15   12.97    0.83
   1  -5 -15    5.64    0.58
   1  -5 -15    4.63    0.63
   1   5 -15    4.60    0.55
  -1   5  15    4.79    0.52
   1   5 -15    4.50    0.64
  -1   5  15    4.48    0.54
   1   5 -15    4.47    0.63
   1   5 -15    5.25    0.47
   1   5 -15    6.05    0.65
   0  -5 -15   26.78    1.31
   0   5 -15   28.20    1.41
   0   5 -15   27.50    1.18
   0   5 -15   27.97    1.51
   0   5 -15   26.91    1.39
   0   5 -15   28.79    1.52
   0   5  15   25.43    1.30
  -1  -5 -15    0.75    0.28
  -1   5 -15    1.03    0.20
  -1   5 -15    0.87    0.41
   1   5  15    0.85    0.28
  -1   5 -15    0.73    0.28
  -1   5 -15    1.26    0.47
  -1   5 -15    0.59    0.34
  -2  -5 -15    0.54    0.27
  -2  -5 -15    0.16    0.21
  -2   5 -15   -0.18    0.35
  -2   5 -15    0.23    0.36
   2   5  15    0.25    0.24
  -2   5 -15   -0.05    0.29
  -3  -5 -15   23.23    1.24
  -3  -5 -15   23.77    1.27
  -3   5 -15   21.70    1.26
   3   5  15   21.14    1.24
  -3   5 -15   24.99    1.50
  -3   5 -15   24.88    1.41
  -4  -5 -15   24.80    1.38
  -4  -5 -15   25.84    1.36
  -4   5 -15   25.58    1.51
  -4   5 -15   28.56    1.64
  -4   5 -15   23.52    1.39
   4   5  15   23.22    1.39
   4  -6 -15    0.99    0.34
   4   6 -15    0.83    0.35
  -4   6  15    1.53    0.40
   4   6 -15    1.03    0.42
  -4   6  15    2.06    0.52
   3  -6 -15   12.77    0.94
   3   6 -15   16.01    1.09
   3   6 -15   16.74    0.99
  -3   6  15   14.86    0.94
   3   6 -15   16.51    1.07
   2  -6 -15   27.86    1.38
   2  -6 -15   25.67    1.43
   2   6 -15   27.44    1.27
   2   6 -15   25.39    1.47
  -2   6  15   26.99    1.31
   2   6 -15   26.86    1.45
   2   6 -15   26.85    1.47
   1  -6 -15    0.27    0.24
   1  -6 -15   -0.15    0.33
   1   6 -15   -0.23    0.26
   1   6 -15    0.60    0.30
   1   6 -15    0.63    0.37
  -1   6  15    0.63    0.24
   1   6 -15    0.44    0.41
  -1   6  15    0.12    0.28
   0  -6 -15   11.92    0.80
   0   6  15   10.28    0.74
   0   6 -15   10.26    0.83
   0   6  15   10.21    0.88
   0   6 -15   10.10    0.91
   0   6 -15    9.59    0.84
   0   6 -15   10.13    0.94
  -1  -6 -15   27.10    1.37
  -1   6 -15   29.24    1.66
  -1   6 -15   25.46    1.45
   1   6  15   27.21    1.36
  -1   6 -15   28.12    1.52
  -1   6 -15   27.42    1.62
   1   6  15   25.74    1.50
  -2  -6 -15    1.36    0.40
  -2   6 -15    0.67    0.37
  -2   6 -15    1.27    0.54
   2   6  15    1.40    0.34
  -3  -6 -15    0.67    0.32
  -3   6 -15   -0.19    0.35
  -3   6 -15    0.12    0.40
   3   6  15    0.06    0.23
   2  -7 -15   20.16    1.30
   2  -7 -15   19.38    1.20
   2   7 -15   22.84    1.36
  -2   7  15   20.52    1.11
   2   7 -15   22.45    1.40
   2   7 -15   21.47    1.37
   1  -7 -15    1.53    0.40
   1   7 -15    1.35    0.53
   1   7 -15    1.73    0.52
   1   7 -15    1.85    0.46
  -1   7  15    2.25    0.37
   1   7 -15    1.73    0.45
  -1   7  15    0.92    0.40
   0  -7 -15    0.42    0.29
   0   7  15    0.14    0.19
   0   7  15   -0.05    0.33
   0   7 -15   -0.03    0.39
   0   7 -15   -0.07    0.44
   0   7 -15    0.19    0.34
   0   7 -15   -0.08    0.25
  -1  -7 -15    0.85    0.35
   1   7  15    0.60    0.38
   1   7  15    0.76    0.28
  -1   7 -15    0.83    0.47
  -1   7 -15    0.96    0.47
  -1   7 -15    1.16    0.38
  -2  -7 -15   13.28    0.97
  -2   7 -15   14.61    1.27
  -2   7 -15   12.09    1.18
   2   7  15   11.87    0.88
   2   7  15   12.89    1.12
   6   0 -16    5.45    0.71
  -6   0  16    5.66    0.78
  -6   0  16    8.28    1.24
  -5   0  16   69.95    3.00
  -5   0  16   73.51    3.36
   5   0 -16   68.85    2.94
  -4   0  16   10.78    1.08
   4   0 -16   10.03    0.76
  -4   0  16   11.48    0.83
  -3   0  16    0.83    0.45
  -3   0  16    0.35    0.30
   3   0 -16    0.77    0.28
   2   0 -16   -0.01    0.16
  -2   0  16   -0.29    0.24
   2   0 -16    0.10    0.20
  -2   0  16   -0.18    0.21
  -1   0  16    8.91    0.60
   1   0 -16    9.51    0.63
   1   0 -16    9.29    0.43
   1   0 -16    8.39    0.65
   0   0 -16   15.03    0.64
   0   0 -16   15.69    0.83
   0   0 -16   15.27    0.89
   0   0  16   14.43    0.80
  -1   0 -16    1.26    0.29
   1   0  16    1.22    0.28
  -1   0 -16    1.53    0.31
  -1   0 -16    1.30    0.20
  -1   0 -16    1.30    0.18
  -1   0 -16    0.76    0.24
   2   0  16   54.80    2.21
  -2   0 -16   56.07    2.32
  -2   0 -16   54.98    2.22
  -2   0 -16   53.31    2.24
  -2   0 -16   52.68    2.10
  -2   0 -16   58.14    2.11
  -3   0 -16    3.76    0.47
   3   0  16    4.43    0.51
  -3   0 -16    4.88    0.48
  -3   0 -16    3.84    0.48
  -3   0 -16    4.90    0.47
  -3   0 -16    3.94    0.48
  -3   0 -16    4.10    0.52
  -4   0 -16   38.41    1.79
  -4   0 -16   39.38    1.74
  -4   0 -16   42.02    1.75
  -4   0 -16   40.25    1.84
   4   0  16   40.95    1.83
  -4   0 -16   35.58    1.77
  -5   0 -16   35.99    1.87
  -5   0 -16   37.39    1.88
  -5   0 -16   44.54    1.89
  -5   0 -16   43.93    1.89
   5   0  16   41.18    1.97
  -6   0 -16    9.74    0.83
  -6   0 -16    9.91    0.83
  -6   0 -16    7.74    0.84
  -6   0 -16    9.36    0.92
  -6  -1  16    0.90    0.52
  -6  -1  16    0.87    0.79
   6  -1 -16    1.71    0.47
  -6   1  16    1.53    0.84
  -6   1  16    1.03    0.46
   6   1 -16    1.23    0.45
   5  -1 -16    6.61    0.69
  -5  -1  16    7.71    0.81
  -5  -1  16    8.63    1.15
  -5   1  16    7.99    1.17
   5   1 -16    7.24    0.78
  -5   1  16    6.38    0.74
  -4  -1  16   28.38    1.46
  -4  -1  16   29.19    1.62
   4  -1 -16   28.45    1.45
   4   1 -16   29.99    1.47
  -4   1  16   29.83    1.82
  -4   1  16   29.77    1.48
   3  -1 -16    5.42    0.57
   3  -1 -16    5.89    0.49
  -3  -1  16    4.27    0.62
  -3  -1  16    5.31    0.56
   3   1 -16    4.37    0.53
  -3   1  16    5.71    0.61
  -3   1  16    5.84    0.81
   2  -1 -16   19.22    1.00
   2  -1 -16   20.86    1.04
  -2  -1  16   18.78    0.99
   2   1 -16   18.45    0.89
  -2   1  16   17.67    0.97
  -2   1  16   20.19    1.15
   2   1 -16   18.49    1.00
   1  -1 -16   50.54    2.10
   1  -1 -16   52.28    1.94
  -1  -1  16   52.95    2.07
   1  -1 -16   54.45    2.19
  -1   1  16   50.89    2.09
   1   1 -16   49.33    2.08
   1   1 -16   51.70    2.19
   1   1 -16   51.21    2.06
  -1   1  16   51.03    2.15
   0  -1 -16   23.09    1.12
   0  -1 -16   23.87    0.98
   0  -1  16   23.19    1.07
   0  -1 -16   21.90    1.16
   0   1 -16   24.24    1.11
   0   1  16   22.62    1.11
   0   1 -16   24.35    1.13
   0   1 -16   22.22    1.17
  -1  -1 -16   23.86    0.95
  -1  -1 -16   24.58    1.24
  -1  -1 -16   24.10    1.16
   1  -1  16   24.73    1.12
  -1  -1 -16   23.68    1.03
  -1   1 -16   24.53    1.21
  -1   1 -16   24.54    1.19
  -1   1 -16   23.65    0.95
   1   1  16   25.33    1.17
  -1   1 -16   24.26    1.14
  -1   1 -16   24.32    1.23
  -1   1 -16   24.95    1.02
  -2  -1 -16    5.66    0.60
  -2  -1 -16    5.15    0.44
  -2  -1 -16    5.23    0.45
  -2  -1 -16    4.20    0.48
   2  -1  16    5.64    0.52
  -2   1 -16    5.56    0.57
  -2   1 -16    5.13    0.57
   2   1  16    5.79    0.51
  -2   1 -16    4.85    0.56
  -2   1 -16    5.39    0.39
  -2   1 -16    5.47    0.47
  -2   1 -16    5.91    0.46
  -3  -1 -16   14.18    0.81
  -3  -1 -16   14.95    0.92
  -3  -1 -16   15.82    0.83
  -3  -1 -16   14.61    0.89
   3  -1  16   16.86    0.89
   3   1  16   15.11    0.91
  -3   1 -16   14.64    0.94
  -3   1 -16   15.21    0.87
  -3   1 -16   15.17    0.84
  -3   1 -16   16.47    0.93
  -3   1 -16   14.44    0.79
  -3   1 -16   15.13    0.93
   4  -1  16   38.39    1.83
  -4  -1 -16   34.98    1.74
  -4  -1 -16   37.54    1.75
  -4  -1 -16   40.11    1.71
  -4   1 -16   37.88    1.65
  -4   1 -16   38.15    1.72
  -4   1 -16   40.05    1.71
  -4   1 -16   36.28    1.77
  -4   1 -16   36.82    1.72
   4   1  16   36.98    1.79
  -5  -1 -16    2.80    0.48
  -5  -1 -16    2.75    0.47
  -5  -1 -16    3.13    0.47
  -5  -1 -16    2.42    0.45
  -5   1 -16    3.13    0.53
  -5   1 -16    2.26    0.42
  -5   1 -16    2.68    0.49
  -5   1 -16    2.71    0.45
   5   1  16    1.56    0.48
  -6  -1 -16    0.79    0.35
  -6  -1 -16    0.36    0.32
  -6  -1 -16    0.03    0.27
  -6   1 -16    0.28    0.31
  -6   1 -16    0.29    0.30
   6   1  16   -0.18    0.34
  -6   1 -16    0.70    0.32
  -6   1 -16    0.06    0.28
  -6  -2  16    7.13    1.16
  -6  -2  16    7.13    0.91
   6  -2 -16    6.53    0.74
   6   2 -16    6.88    0.81
  -6   2  16    6.19    0.81
  -6   2  16    8.44    1.26
   5  -2 -16   19.97    1.17
  -5  -2  16   19.13    1.47
  -5  -2  16   20.26    1.30
  -5   2  16   18.69    1.19
  -5   2  16   17.89    1.51
   5   2 -16   19.61    1.17
  -4  -2  16    1.31    0.44
  -4  -2  16    0.40    0.45
   4  -2 -16    1.25    0.28
   4  -2 -16    1.02    0.32
   4   2 -16    0.82    0.33
  -4   2  16    1.05    0.35
  -4   2  16    1.38    0.70
   3  -2 -16    5.96    0.50
  -3  -2  16    5.43    0.67
   3  -2 -16    5.20    0.57
  -3  -2  16    6.56    0.65
   3   2 -16    6.00    0.62
  -3   2  16    5.72    0.88
  -3   2  16    4.10    0.53
   2  -2 -16    3.70    0.39
  -2  -2  16    4.81    0.51
   2  -2 -16    4.89    0.53
   2  -2 -16    4.14    0.49
   2   2 -16    4.25    0.48
  -2   2  16    4.30    0.49
  -2   2  16    4.93    0.69
   2   2 -16    4.20    0.38
   1  -2 -16   16.39    0.78
   1  -2 -16   16.20    0.89
   1  -2 -16   15.35    0.91
  -1  -2  16   16.55    0.85
   1   2 -16   16.40    0.87
   1   2 -16   16.27    0.85
  -1   2  16   16.08    0.96
  -1   2  16   15.48    0.87
   0  -2 -16   61.97    2.59
   0  -2  16   63.88    2.43
   0  -2 -16   63.59    2.52
   0  -2 -16   64.06    2.39
   0   2  16   61.89    2.50
   0   2 -16   63.30    2.46
   0   2  16   61.32    2.48
   0   2 -16   62.39    2.51
   0   2 -16   65.75    2.60
   1  -2  16    3.50    0.37
  -1  -2 -16    3.10    0.36
  -1  -2 -16    3.48    0.48
  -1  -2 -16    2.48    0.36
   1   2  16    2.29    0.36
  -1   2 -16    2.83    0.44
  -1   2 -16    3.49    0.38
  -1   2 -16    3.26    0.35
  -1   2 -16    2.87    0.42
  -2  -2 -16   25.19    1.27
  -2  -2 -16   22.78    1.04
  -2  -2 -16   23.93    1.09
   2  -2  16   23.30    1.10
  -2  -2 -16   23.21    1.18
  -2   2 -16   23.73    1.21
   2   2  16   23.43    1.19
  -2   2 -16   23.13    1.10
  -2   2 -16   24.53    1.10
  -2   2 -16   23.71    1.23
  -2   2 -16   23.07    1.25
  -3  -2 -16    1.62    0.32
  -3  -2 -16    1.73    0.35
  -3  -2 -16    1.50    0.38
  -3   2 -16    1.99    0.41
  -3   2 -16    2.30    0.34
   3   2  16    2.31    0.41
  -3   2 -16    1.91    0.35
  -3   2 -16    1.85    0.36
  -3   2 -16    1.94    0.44
  -4  -2 -16    3.69    0.48
  -4  -2 -16    3.50    0.53
  -4  -2 -16    3.01    0.48
  -4   2 -16    4.16    0.57
  -4   2 -16    3.00    0.49
  -4   2 -16    3.00    0.43
   4   2  16    3.13    0.53
  -4   2 -16    4.16    0.53
  -5  -2 -16    5.93    0.68
  -5  -2 -16    7.40    0.67
  -5  -2 -16    6.86    0.77
  -5   2 -16    6.32    0.66
  -5   2 -16    6.16    0.85
  -5   2 -16    5.91    0.73
  -5   2 -16    5.45    0.64
   5   2  16    6.59    0.82
  -6  -2 -16    2.98    0.57
  -6  -2 -16    3.49    0.54
  -6  -2 -16    2.65    0.51
  -6   2 -16    3.95    0.65
  -6   2 -16    2.81    0.54
   6   2  16    1.99    0.59
  -6   2 -16    2.47    0.46
  -6  -3  16    4.12    0.97
  -6  -3  16    5.59    0.85
  -6   3  16    3.68    0.94
   6   3 -16    3.57    0.64
  -6   3  16    3.07    0.64
  -5  -3  16   17.28    1.21
  -5  -3  16   15.73    1.29
  -5   3  16   16.05    1.10
  -5   3  16   16.57    1.43
   5   3 -16   16.92    1.10
   4  -3 -16   26.69    1.37
  -4  -3  16   29.29    1.50
  -4  -3  16   25.52    1.50
  -4   3  16   26.41    1.39
  -4   3  16   27.65    1.81
   4   3 -16   28.03    1.43
  -3  -3  16    0.76    0.33
   3  -3 -16    0.65    0.24
   3  -3 -16    0.45    0.25
  -3   3  16    0.41    0.26
  -3   3  16    0.50    0.55
   3   3 -16    0.21    0.28
   3   3 -16    0.45    0.20
   2  -3 -16    2.74    0.37
   2  -3 -16    3.56    0.46
  -2  -3  16    4.05    0.47
   2  -3 -16    2.92    0.44
   2   3 -16    2.66    0.40
  -2   3  16    2.31    0.60
  -2   3  16    3.29    0.44
   2   3 -16    2.58    0.35
   2   3 -16    3.53    0.45
   2   3 -16    2.65    0.38
   1  -3 -16   46.07    1.81
   1  -3 -16   46.04    1.89
  -1  -3  16   43.24    1.84
   1  -3 -16   45.28    1.98
   1   3 -16   45.66    1.85
   1   3 -16   45.55    1.99
  -1   3  16   45.63    2.00
   1   3 -16   43.55    1.85
  -1   3  16   39.50    1.84
   1   3 -16   42.49    1.90
   0  -3 -16  176.80    6.32
   0  -3 -16  181.62    6.43
   0  -3 -16  179.43    6.54
   0   3 -16  175.00    6.52
   0   3  16  177.14    6.38
   0   3 -16  176.61    6.43
   0   3 -16  173.33    6.33
   0   3  16  171.40    6.41
  -1  -3 -16  131.82    5.06
  -1  -3 -16  137.02    4.84
  -1  -3 -16  135.20    4.95
   1   3  16  135.46    4.82
  -1   3 -16  137.26    5.00
  -1   3 -16  122.88    5.00
  -1   3 -16  132.31    4.83
   1   3  16  128.83    4.91
  -2  -3 -16    8.89    0.67
  -2  -3 -16    9.50    0.64
  -2  -3 -16    9.96    0.78
  -2   3 -16    9.38    0.60
  -2   3 -16   10.21    0.75
   2   3  16    9.63    0.69
  -2   3 -16   10.91    0.68
  -2   3 -16    9.60    0.81
  -3  -3 -16   23.16    1.28
  -3  -3 -16   21.99    1.11
  -3  -3 -16   22.73    1.20
  -3   3 -16   21.08    1.12
  -3   3 -16   22.19    1.23
  -3   3 -16   21.68    1.06
   3   3  16   21.28    1.18
  -3   3 -16   20.65    1.28
  -4  -3 -16   50.07    2.31
  -4  -3 -16   57.92    2.45
  -4  -3 -16   51.76    2.24
   4   3  16   51.30    2.35
  -4   3 -16   53.80    2.20
  -4   3 -16   50.53    2.27
  -4   3 -16   54.68    2.41
  -5  -3 -16    5.92    0.72
  -5  -3 -16    5.75    0.68
  -5  -3 -16    6.17    0.76
  -5   3 -16    5.89    0.77
  -5   3 -16    5.26    0.58
  -5   3 -16    6.50    0.72
   5   3  16    4.35    0.66
  -5  -4  16    0.69    0.56
  -5   4  16    1.31    0.43
   5   4 -16    0.82    0.41
  -5   4  16    1.68    0.68
  -4  -4  16    3.25    0.63
  -4   4  16    3.95    0.80
   4   4 -16    4.73    0.60
  -4   4  16    4.60    0.60
   3  -4 -16    9.26    0.68
   3  -4 -16   10.35    0.72
   3   4 -16   11.36    0.73
   3   4 -16    9.12    0.78
  -3   4  16   10.08    0.75
  -3   4  16   11.03    1.13
   3   4 -16   11.73    0.84
   2  -4 -16    1.59    0.33
   2  -4 -16    1.18    0.30
   2  -4 -16    0.99    0.29
   2   4 -16    1.35    0.32
   2   4 -16    0.60    0.31
  -2   4  16    0.86    0.47
  -2   4  16    1.25    0.31
   2   4 -16    1.28    0.38
   2   4 -16    0.99    0.26
   2   4 -16    1.28    0.32
   1  -4 -16    4.30    0.49
   1  -4 -16    3.35    0.43
   1  -4 -16    4.77    0.60
   1   4 -16    3.96    0.49
   1   4 -16    3.79    0.43
   1   4 -16    3.70    0.47
   1   4 -16    4.80    0.65
  -1   4  16    4.21    0.60
   1   4 -16    4.06    0.56
  -1   4  16    4.04    0.47
   0  -4 -16    2.45    0.47
   0  -4 -16    2.00    0.36
   0  -4 -16    1.91    0.33
   0   4 -16    2.27    0.31
   0   4 -16    1.57    0.36
   0   4 -16    2.42    0.50
   0   4  16    1.67    0.32
   0   4 -16    3.09    0.45
   0   4 -16    1.81    0.43
  -1  -4 -16    1.34    0.41
  -1  -4 -16    1.32    0.29
  -1  -4 -16    1.08    0.30
  -1   4 -16    1.39    0.36
  -1   4 -16    1.97    0.27
  -1   4 -16    1.55    0.43
  -1   4 -16    1.21    0.42
   1   4  16    1.07    0.30
  -2  -4 -16    1.56    0.36
  -2  -4 -16    1.13    0.39
  -2  -4 -16    1.11    0.32
  -2   4 -16    1.45    0.40
  -2   4 -16    1.12    0.32
   2   4  16    1.31    0.34
  -2   4 -16    1.20    0.41
  -2   4 -16    1.33    0.24
  -3  -4 -16    7.44    0.88
  -3  -4 -16    7.10    0.63
  -3  -4 -16    7.81    0.67
  -3   4 -16    5.61    0.80
  -3   4 -16    8.85    0.87
  -3   4 -16    7.24    0.66
   3   4  16    7.71    0.70
  -3   4 -16    7.63    0.53
  -4  -4 -16    8.12    0.89
  -4  -4 -16    7.05    0.75
  -4  -4 -16    6.96    0.74
  -4   4 -16    8.03    0.57
   4   4  16    7.20    0.76
  -4   4 -16    8.71    0.91
  -4   4 -16    7.26    0.75
  -5  -4 -16    1.32    0.39
  -5  -4 -16    0.80    0.42
  -5  -4 -16    0.90    0.35
  -5   4 -16    1.29    0.30
  -5   4 -16    1.13    0.39
  -5   4 -16    1.52    0.46
   5   4  16    1.01    0.43
  -5  -5  16    3.59    0.76
  -5   5  16    4.34    0.83
   5   5 -16    5.93    0.76
  -5   5  16    4.15    0.64
  -4  -5  16    2.44    0.50
   4   5 -16    1.05    0.40
   4   5 -16    1.18    0.35
  -4   5  16    1.26    0.39
  -4   5  16    1.41    0.53
   3  -5 -16    0.27    0.22
   3  -5 -16    0.41    0.25
  -3   5  16    0.03    0.38
   3   5 -16   -0.05    0.27
   3   5 -16    0.14    0.26
  -3   5  16    0.21    0.24
   3   5 -16   -0.11    0.20
   2  -5 -16    6.54    0.57
   2  -5 -16    4.22    0.56
   2   5 -16    4.91    0.58
   2   5 -16    5.13    0.55
   2   5 -16    5.91    0.71
  -2   5  16    4.73    0.53
   2   5 -16    4.49    0.64
   1  -5 -16   -0.16    0.19
   1  -5 -16   -0.03    0.26
  -1   5  16    0.13    0.21
   1   5 -16    0.23    0.33
   1   5 -16    0.04    0.20
   1   5 -16   -0.28    0.24
   1   5 -16    0.13    0.24
  -1   5  16    0.17    0.26
   1   5 -16    0.20    0.22
   0  -5 -16   12.13    0.93
   0  -5 -16   12.26    0.79
   0   5 -16   11.40    0.84
   0   5  16   12.23    0.79
   0   5 -16   10.40    0.93
   0   5 -16   12.03    0.84
   0   5 -16   12.30    0.67
   0   5 -16   11.70    0.94
  -1  -5 -16   25.48    1.31
  -1   5 -16   29.86    1.59
  -1   5 -16   25.76    1.41
  -1   5 -16   26.49    1.53
  -1   5 -16   28.79    1.17
   1   5  16   26.20    1.33
  -2  -5 -16    1.16    0.41
  -2  -5 -16    0.92    0.32
   2   5  16    0.55    0.27
  -2   5 -16    1.50    0.43
  -2   5 -16    0.86    0.46
  -2   5 -16    0.88    0.45
  -3  -5 -16    2.32    0.45
  -3  -5 -16    2.61    0.43
   3   5  16    3.08    0.50
  -3   5 -16    2.02    0.49
  -3   5 -16    2.89    0.49
  -3   5 -16    2.81    0.63
  -4  -5 -16    5.72    0.70
  -4  -5 -16    4.37    0.59
   4   5  16    4.87    0.64
  -4   5 -16    4.80    0.72
  -4   5 -16    5.69    0.84
  -4   5 -16    7.04    0.75
   4  -6 -16   32.66    1.70
   4   6 -16   34.05    1.70
  -4   6  16   34.08    1.70
   4   6 -16   38.65    1.81
   3  -6 -16    8.57    0.83
  -3   6  16    7.17    0.70
   3   6 -16    6.15    0.74
   3   6 -16    7.54    0.72
   3   6 -16    7.70    0.87
   2  -6 -16    0.15    0.30
   2  -6 -16    0.26    0.28
   2   6 -16    0.54    0.38
  -2   6  16    0.24    0.21
   2   6 -16    0.26    0.33
   2   6 -16    0.30    0.27
   2   6 -16    0.42    0.27
   1  -6 -16   33.98    1.79
   1  -6 -16   34.80    1.67
   1   6 -16   34.02    1.80
   1   6 -16   35.66    1.70
   1   6 -16   37.13    1.78
   1   6 -16   34.66    1.84
  -1   6  16   36.13    1.63
  -1   6  16   36.27    1.72
   0  -6 -16   16.82    1.03
   0   6 -16   17.31    1.22
   0   6 -16   18.75    1.14
   0   6  16   17.03    1.01
   0   6 -16   19.92    1.30
   0   6  16   17.00    1.12
   0   6 -16   17.96    1.13
  -1  -6 -16   -0.11    0.22
  -1   6 -16    0.15    0.39
  -1   6 -16    0.56    0.27
  -1   6 -16    0.66    0.41
  -1   6 -16    0.34    0.36
   1   6  16    0.17    0.22
  -2  -6 -16    0.24    0.28
  -2   6 -16   -0.49    0.28
  -2   6 -16    0.52    0.44
   2   6  16   -0.16    0.19
  -3  -6 -16    4.31    0.62
  -3   6 -16    6.77    0.96
  -3   6 -16    4.31    0.69
   3   6  16    3.66    0.56
   2  -7 -16   13.12    1.05
   2  -7 -16   12.92    0.96
   2   7 -16   16.67    1.13
  -2   7  16   16.04    0.94
   2   7 -16   15.72    1.18
   2   7 -16   15.03    1.15
   1  -7 -16   -0.03    0.42
   1  -7 -16    1.00    0.36
   1   7 -16    0.25    0.41
   1   7 -16    0.54    0.32
   1   7 -16    0.25    0.43
   1   7 -16    0.77    0.52
  -1   7  16    0.84    0.39
  -1   7  16    0.83    0.28
   0  -7 -16   12.54    0.93
   0   7 -16   15.54    1.24
   0   7  16   15.22    1.08
   0   7 -16   13.83    1.05
   0   7 -16   14.25    1.20
   0   7 -16   13.42    1.06
   0   7  16   14.02    0.91
  -1  -7 -16    1.87    0.45
  -1   7 -16    1.75    0.54
  -1   7 -16    1.20    0.37
  -1   7 -16    1.08    0.59
   1   7  16    1.61    0.38
  -1   7 -16    2.10    0.63
   6   0 -17    0.14    0.33
  -6   0  17   -0.44    0.38
  -6   0  17    0.04    0.65
  -5   0  17   -0.21    0.32
   5   0 -17    0.36    0.35
  -5   0  17   -0.11    0.58
  -4   0  17   -0.10    0.31
  -4   0  17   -0.50    0.45
   4   0 -17    0.20    0.29
  -3   0  17    0.17    0.24
  -3   0  17   -0.32    0.37
   3   0 -17   -0.06    0.23
  -2   0  17    0.29    0.33
   2   0 -17   -0.08    0.10
   2   0 -17   -0.15    0.17
   2   0 -17    0.23    0.23
  -2   0  17    0.14    0.23
  -1   0  17   -0.18    0.15
   1   0 -17    0.03    0.09
   1   0 -17   -0.14    0.16
   1   0 -17   -0.18    0.16
   0   0 -17    0.04    0.17
   0   0 -17   -0.03    0.14
   0   0  17   -0.02    0.16
   0   0 -17   -0.08    0.09
   1   0  17    0.07    0.19
  -1   0 -17    0.14    0.18
  -1   0 -17    0.02    0.18
  -1   0 -17   -0.12    0.18
  -1   0 -17    0.08    0.12
  -1   0 -17    0.03    0.11
  -2   0 -17    0.07    0.15
  -2   0 -17   -0.02    0.18
   2   0  17    0.07    0.22
  -2   0 -17    0.05    0.20
  -2   0 -17    0.05    0.17
  -2   0 -17   -0.03    0.15
  -3   0 -17    0.02    0.18
  -3   0 -17    0.28    0.20
  -3   0 -17    0.01    0.16
  -3   0 -17    0.09    0.18
   3   0  17   -0.08    0.21
  -3   0 -17   -0.01    0.22
  -3   0 -17   -0.17    0.17
   4   0  17   -0.26    0.25
  -4   0 -17    0.23    0.23
  -4   0 -17    0.18    0.22
  -4   0 -17   -0.22    0.18
  -4   0 -17   -0.10    0.23
  -4   0 -17   -0.11    0.21
  -5   0 -17   -0.16    0.21
  -5   0 -17   -0.19    0.23
  -5   0 -17   -0.20    0.22
  -5   0 -17   -0.21    0.24
   5   0  17    0.00    0.34
  -6   0 -17   -0.10    0.27
  -6   0 -17   -0.26    0.24
  -6   0 -17   -0.18    0.28
  -6   0 -17   -0.44    0.22
   6  -1 -17   10.95    0.95
  -6  -1  17   11.39    1.36
  -6  -1  17   12.84    1.15
  -6   1  17   13.17    1.51
   6   1 -17   11.51    1.00
  -6   1  17   13.25    1.12
  -5  -1  17   35.06    1.79
  -5  -1  17   34.73    2.01
   5  -1 -17   34.31    1.72
   5   1 -17   34.02    1.72
  -5   1  17   34.61    1.77
  -5   1  17   35.95    2.13
   4  -1 -17   33.03    1.58
  -4  -1  17   30.91    1.73
  -4  -1  17   33.49    1.63
   4   1 -17   30.59    1.58
  -4   1  17   34.81    1.62
  -4   1  17   32.52    1.93
  -3  -1  17   38.05    1.81
  -3  -1  17   38.58    1.71
   3  -1 -17   35.48    1.66
   3  -1 -17   38.44    1.68
   3   1 -17   36.45    1.68
  -3   1  17   35.79    1.88
  -3   1  17   34.60    1.67
   2  -1 -17   22.00    1.17
  -2  -1  17   25.07    1.18
   2  -1 -17   24.81    1.02
   2  -1 -17   25.07    1.22
   2   1 -17   22.71    1.06
  -2   1  17   23.89    1.31
  -2   1  17   22.59    1.17
   2   1 -17   21.68    1.16
   1  -1 -17    5.28    0.37
   1  -1 -17    4.80    0.51
   1  -1 -17    5.95    0.54
  -1  -1  17    5.67    0.49
  -1   1  17    6.05    0.57
   1   1 -17    5.87    0.51
   1   1 -17    5.50    0.47
   1   1 -17    5.03    0.58
  -1   1  17    6.36    0.51
   0  -1 -17   88.06    3.44
   0  -1 -17   88.95    3.53
   0  -1 -17   93.60    3.27
   0  -1  17   92.00    3.39
   0   1 -17   83.55    3.40
   0   1  17   92.11    3.44
   0   1 -17   90.06    3.44
   0   1 -17   92.00    3.55
  -1  -1 -17   98.40    3.82
  -1  -1 -17  101.28    3.65
  -1  -1 -17  101.19    3.91
   1  -1  17  106.18    3.77
  -1   1 -17   99.18    3.84
  -1   1 -17   98.82    3.89
   1   1  17   98.50    3.78
  -1   1 -17  101.48    3.84
  -1   1 -17  103.62    3.63
  -1   1 -17   95.60    3.77
  -2  -1 -17    0.73    0.25
  -2  -1 -17    0.67    0.26
  -2  -1 -17    0.93    0.21
  -2  -1 -17    0.85    0.22
   2  -1  17    0.50    0.22
  -2  -1 -17    1.08    0.28
  -2   1 -17    0.63    0.20
  -2   1 -17    0.76    0.24
  -2   1 -17    0.96    0.32
  -2   1 -17    0.68    0.25
  -2   1 -17    1.21    0.24
  -2   1 -17    0.52    0.24
   2   1  17    0.94    0.30
  -3  -1 -17    0.89    0.27
   3  -1  17    1.01    0.30
  -3  -1 -17    1.05    0.31
  -3  -1 -17    1.21    0.30
  -3  -1 -17    1.32    0.34
  -3   1 -17    1.30    0.34
  -3   1 -17    1.08    0.24
   3   1  17    0.74    0.29
  -3   1 -17    0.99    0.29
  -3   1 -17    1.86    0.38
  -3   1 -17    1.18    0.35
  -3   1 -17    1.60    0.30
  -4  -1 -17    0.49    0.25
  -4  -1 -17    0.58    0.26
  -4  -1 -17    0.26    0.23
  -4  -1 -17    0.56    0.27
  -4   1 -17    0.34    0.29
  -4   1 -17    0.48    0.25
  -4   1 -17    0.18    0.21
  -4   1 -17    0.79    0.30
   4   1  17    0.89    0.39
  -4   1 -17    0.60    0.26
  -5  -1 -17    4.67    0.64
  -5  -1 -17    5.75    0.67
  -5  -1 -17    6.36    0.69
  -5  -1 -17    5.18    0.63
  -5   1 -17    5.74    0.61
   5   1  17    3.51    0.59
  -5   1 -17    5.47    0.69
  -5   1 -17    4.13    0.56
  -5   1 -17    4.69    0.60
  -6  -1 -17    6.38    0.79
  -6  -1 -17    6.59    0.78
  -6  -1 -17    6.90    0.77
  -6   1 -17    6.39    0.71
  -6   1 -17    5.14    0.69
  -6   1 -17    6.50    0.76
  -6   1 -17    6.10    0.74
   6   1  17    6.23    0.84
  -6  -2  17    5.69    0.84
   6  -2 -17    7.59    0.82
  -6  -2  17    6.45    1.13
  -6   2  17    7.71    0.93
   6   2 -17    6.51    0.79
  -6   2  17    8.53    1.29
   5  -2 -17   10.75    0.83
  -5  -2  17    9.13    0.93
  -5  -2  17   10.33    1.17
  -5   2  17   10.22    1.32
   5   2 -17    6.87    0.76
  -5   2  17    7.92    0.83
  -4  -2  17   -0.26    0.43
  -4  -2  17    0.38    0.36
   4  -2 -17   -0.02    0.18
   4  -2 -17    0.52    0.31
   4   2 -17    0.56    0.30
  -4   2  17    0.05    0.30
  -4   2  17   -0.07    0.59
  -3  -2  17    5.45    0.67
  -3  -2  17    6.10    0.62
   3  -2 -17    5.51    0.58
   3  -2 -17    4.39    0.51
  -3   2  17    6.22    0.89
  -3   2  17    4.33    0.54
   3   2 -17    6.13    0.63
   2  -2 -17   34.50    1.56
   2  -2 -17   32.51    1.55
  -2  -2  17   33.74    1.52
   2  -2 -17   35.31    1.42
  -2   2  17   33.97    1.54
  -2   2  17   34.48    1.71
   2   2 -17   33.01    1.43
   2   2 -17   32.35    1.52
   1  -2 -17   14.81    0.90
  -1  -2  17   15.99    0.83
   1  -2 -17   15.50    0.76
   1  -2 -17   15.35    0.87
   1   2 -17   15.77    0.84
  -1   2  17   15.35    0.87
  -1   2  17   14.95    0.96
   1   2 -17   15.48    0.86
   0  -2 -17   37.76    1.51
   0  -2 -17   36.84    1.64
   0  -2  17   37.72    1.56
   0  -2 -17   37.62    1.72
   0   2  17   35.69    1.62
   0   2 -17   37.13    1.71
   0   2 -17   38.06    1.60
   0   2  17   36.90    1.61
   0   2 -17   35.91    1.63
  -1  -2 -17   95.70    3.61
   1  -2  17   97.90    3.50
  -1  -2 -17   90.44    3.69
  -1  -2 -17   91.58    3.46
  -1   2 -17   90.93    3.65
   1   2  17   88.85    3.56
  -1   2 -17   90.29    3.52
  -1   2 -17   97.08    3.64
  -1   2 -17   99.05    3.46
  -2  -2 -17   54.21    2.36
  -2  -2 -17   54.34    2.28
  -2  -2 -17   54.25    2.12
  -2  -2 -17   53.40    2.14
  -2   2 -17   51.68    2.18
  -2   2 -17   55.42    2.31
  -2   2 -17   56.98    2.15
  -2   2 -17   56.18    2.32
   2   2  17   51.41    2.24
  -2   2 -17   51.82    2.31
  -3  -2 -17   36.79    1.63
  -3  -2 -17   38.86    1.76
  -3  -2 -17   37.31    1.80
  -3   2 -17   37.46    1.73
  -3   2 -17   39.98    1.67
  -3   2 -17   35.64    1.77
  -3   2 -17   37.88    1.79
   3   2  17   38.09    1.75
  -3   2 -17   36.14    1.65
  -4  -2 -17   52.04    2.28
  -4  -2 -17   48.30    2.21
  -4  -2 -17   51.46    2.14
  -4   2 -17   47.49    2.12
   4   2  17   47.08    2.23
  -4   2 -17   50.79    2.26
  -4   2 -17   51.57    2.16
  -5  -2 -17   31.25    1.60
  -5  -2 -17   33.25    1.71
  -5  -2 -17   38.20    1.76
   5   2  17   31.06    1.75
  -5   2 -17   33.94    1.64
  -5   2 -17   30.85    1.68
  -5   2 -17   31.61    1.60
  -6  -3  17   -0.11    0.71
  -6   3  17    0.27    0.44
  -6   3  17    1.07    0.79
   6   3 -17    1.08    0.48
  -5  -3  17    1.40    0.50
  -5  -3  17    2.01    0.66
   5   3 -17    1.60    0.47
  -5   3  17    2.25    0.78
  -5   3  17    2.25    0.51
   4  -3 -17    1.03    0.36
  -4  -3  17    1.52    0.54
  -4  -3  17    1.43    0.45
  -4   3  17    2.09    0.76
  -4   3  17    1.05    0.38
   4   3 -17    1.20    0.40
   3  -3 -17    0.34    0.26
   3  -3 -17    0.79    0.26
  -3  -3  17    0.70    0.33
   3   3 -17    0.67    0.32
  -3   3  17    0.26    0.55
  -3   3  17    0.98    0.32
   3   3 -17    0.89    0.24
  -2  -3  17   29.11    1.44
   2  -3 -17   30.32    1.44
   2  -3 -17   30.44    1.31
   2  -3 -17   29.38    1.39
   2   3 -17   27.75    1.28
   2   3 -17   29.71    1.38
  -2   3  17   25.76    1.58
   2   3 -17   29.27    1.35
  -2   3  17   28.55    1.38
   1  -3 -17   19.09    0.91
   1  -3 -17   19.69    1.01
   1  -3 -17   16.95    1.02
   1   3 -17   19.25    0.97
   1   3 -17   18.03    1.02
  -1   3  17   16.10    1.06
  -1   3  17   16.07    0.94
   1   3 -17   16.67    0.94
   1   3 -17   18.75    1.08
   0  -3 -17   46.93    1.98
   0  -3 -17   45.56    2.07
   0  -3 -17   48.46    1.89
   0   3  17   43.40    1.95
   0   3 -17   45.61    2.06
   0   3  17   44.84    1.94
   0   3 -17   46.79    1.99
   0   3 -17   47.10    1.90
  -1  -3 -17    7.15    0.52
  -1  -3 -17    5.72    0.67
  -1  -3 -17    5.77    0.53
  -1   3 -17    6.39    0.49
   1   3  17    7.39    0.58
  -1   3 -17    5.42    0.60
  -1   3 -17    5.90    0.69
  -2  -3 -17   -0.05    0.19
  -2  -3 -17    0.17    0.22
  -2  -3 -17    0.09    0.23
  -2   3 -17    0.12    0.15
   2   3  17    0.27    0.24
  -2   3 -17    0.04    0.19
  -2   3 -17    0.10    0.28
  -2   3 -17    0.04    0.24
  -3  -3 -17   -0.07    0.19
  -3  -3 -17    0.16    0.22
  -3  -3 -17    0.33    0.28
   3   3  17    0.22    0.27
  -3   3 -17    0.07    0.16
  -3   3 -17    0.01    0.23
  -3   3 -17    0.16    0.32
  -3   3 -17    0.14    0.23
  -4  -3 -17    2.05    0.40
  -4  -3 -17    1.46    0.35
  -4  -3 -17    2.76    0.52
  -4   3 -17    1.78    0.40
  -4   3 -17    1.52    0.42
   4   3  17    0.89    0.36
  -4   3 -17    1.34    0.31
  -5  -3 -17    6.63    0.77
  -5  -3 -17    6.61    0.75
  -5  -3 -17    7.04    0.79
   5   3  17    7.06    0.84
  -5   3 -17    8.71    0.84
  -5   3 -17    6.83    0.85
  -5   3 -17    6.72    0.61
  -5  -4  17   -0.23    0.52
  -5   4  17    0.37    0.34
  -5   4  17    0.35    0.57
   5   4 -17   -0.28    0.35
  -4  -4  17    0.34    0.36
  -4   4  17    0.51    0.56
  -4   4  17   -0.16    0.27
   4   4 -17    0.31    0.34
   3  -4 -17    3.29    0.47
   3  -4 -17    3.52    0.47
   3   4 -17    2.56    0.40
   3   4 -17    2.93    0.52
  -3   4  17    2.75    0.45
   3   4 -17    3.47    0.52
  -3   4  17    3.80    0.75
   2  -4 -17   14.81    0.96
   2  -4 -17   15.67    0.90
   2  -4 -17   16.35    0.94
  -2   4  17   15.83    0.94
   2   4 -17   15.18    0.92
  -2   4  17   12.97    1.10
   2   4 -17   16.90    0.98
   2   4 -17   17.84    1.08
   2   4 -17   16.92    0.94
   1  -4 -17   47.19    1.89
   1  -4 -17   45.56    1.94
   1  -4 -17   45.83    2.05
   1   4 -17   43.76    1.86
   1   4 -17   46.28    2.02
  -1   4  17   39.82    1.90
   1   4 -17   45.47    2.08
  -1   4  17   40.51    2.02
   1   4 -17   45.83    1.97
   1   4 -17   46.16    1.94
   0  -4 -17    4.09    0.50
   0  -4 -17    4.08    0.59
   0  -4 -17    4.25    0.53
   0   4 -17    4.12    0.62
   0   4 -17    4.15    0.59
   0   4  17    4.18    0.51
   0   4 -17    5.28    0.60
   0   4 -17    4.12    0.43
  -1  -4 -17    4.52    0.65
  -1  -4 -17    4.56    0.55
  -1  -4 -17    6.03    0.60
   1   4  17    5.45    0.57
  -1   4 -17    5.50    0.65
  -1   4 -17    5.44    0.44
  -1   4 -17    5.57    0.72
  -1   4 -17    4.41    0.63
  -2  -4 -17   32.40    1.58
  -2  -4 -17   35.02    1.75
  -2  -4 -17   33.14    1.52
  -2   4 -17   31.63    1.72
  -2   4 -17   34.56    1.43
  -2   4 -17   32.54    1.53
  -2   4 -17   34.58    1.69
   2   4  17   31.22    1.57
  -3  -4 -17   17.71    1.19
  -3  -4 -17   17.31    1.04
  -3  -4 -17   18.08    1.00
  -3   4 -17   14.68    1.08
  -3   4 -17   16.25    1.00
   3   4  17   15.81    1.03
  -3   4 -17   16.79    0.87
  -3   4 -17   14.36    1.14
  -4  -4 -17   42.31    1.97
  -4  -4 -17   43.66    2.06
  -4  -4 -17   46.49    2.21
  -4   4 -17   44.79    1.86
  -4   4 -17   43.16    2.01
   4   4  17   41.13    2.06
  -4   4 -17   44.57    2.15
[truncated: 93,185 more chars]
