# Supplementary material for: Carbopalladation of C–C σ-bonds enabled by strained boronate complexes
Source: Springer Nature journal article supplement (doi:10.1038/s41557-018-0181-x), 2018-11-27
Supplement: 41557_2018_181_MOESM45_ESM.mol [file 41557_2018_181_MOESM45_ESM.mol]

nchem.18071374C-comp15.mol
  ChemDraw10241814292D

 27 30  0  0  0  0  0  0  0  0999 V2000
   -0.9057    0.6638    0.0000 C   0  0  0  0  0  0  0  0  0  0  0  0
   -0.9116   -0.1612    0.0000 C   0  0  0  0  0  0  0  0  0  0  0  0
   -0.0866   -0.1671    0.0000 C   0  0  0  0  0  0  0  0  0  0  0  0
   -0.0807    0.6579    0.0000 C   0  0  0  0  0  0  0  0  0  0  0  0
   -0.0206   -0.9895    0.0000 C   0  0  0  0  0  0  0  0  0  0  0  0
    0.7347   -0.2449    0.0000 B   0  0  0  0  0  0  0  0  0  0  0  0
   -1.4849    1.2513    0.0000 C   0  0  0  0  0  0  0  0  0  0  0  0
   -1.2656    2.0466    0.0000 C   0  0  0  0  0  0  0  0  0  0  0  0
   -1.8448    2.6342    0.0000 C   0  0  0  0  0  0  0  0  0  0  0  0
   -2.6432    2.4264    0.0000 C   0  0  0  0  0  0  0  0  0  0  0  0
   -2.8624    1.6310    0.0000 C   0  0  0  0  0  0  0  0  0  0  0  0
   -2.2833    1.0435    0.0000 C   0  0  0  0  0  0  0  0  0  0  0  0
   -0.6998   -1.4578    0.0000 C   0  0  0  0  0  0  0  0  0  0  0  0
   -0.6338   -2.2802    0.0000 C   0  0  0  0  0  0  0  0  0  0  0  0
    0.1114   -2.6342    0.0000 C   0  0  0  0  0  0  0  0  0  0  0  0
    0.7906   -2.1658    0.0000 C   0  0  0  0  0  0  0  0  0  0  0  0
    0.7246   -1.3435    0.0000 C   0  0  0  0  0  0  0  0  0  0  0  0
    1.1545   -0.9551    0.0000 O   0  0  0  0  0  0  0  0  0  0  0  0
    1.9597   -0.7753    0.0000 C   0  0  0  0  0  0  0  0  0  0  0  0
    2.0375    0.0461    0.0000 C   0  0  0  0  0  0  0  0  0  0  0  0
    1.2804    0.3739    0.0000 O   0  0  0  0  0  0  0  0  0  0  0  0
    2.1675   -1.5737    0.0000 C   0  0  0  0  0  0  0  0  0  0  0  0
    2.7550   -0.9945    0.0000 C   0  0  0  0  0  0  0  0  0  0  0  0
    2.8624    0.0546    0.0000 C   0  0  0  0  0  0  0  0  0  0  0  0
    2.4426    0.7647    0.0000 C   0  0  0  0  0  0  0  0  0  0  0  0
   -2.5025    0.2481    0.0000 C   0  0  0  0  0  0  0  0  0  0  0  0
   -0.4672    2.2545    0.0000 C   0  0  0  0  0  0  0  0  0  0  0  0
  1  2  1  0      
  2  3  1  0      
  3  4  1  0      
  4  1  1  0      
  3  5  1  1      
  3  6  1  6      
  1  7  1  1      
  7  8  2  0      
  8  9  1  0      
  9 10  2  0      
 10 11  1  0      
 11 12  2  0      
 12  7  1  0      
  5 13  1  0      
 13 14  1  0      
 14 15  1  0      
 15 16  1  0      
 16 17  1  0      
 17  5  1  0      
  6 18  1  0      
 18 19  1  0      
 19 20  1  0      
 20 21  1  0      
 21  6  1  0      
 19 22  1  0      
 19 23  1  0      
 20 24  1  0      
 20 25  1  0      
 12 26  1  0      
  8 27  1  0      
M  END
